# Supplementary material for: Navigating the archaeal frontier: insights and projections from bioinformatic pipelines
Source: Front Microbiol. 2024 Sep 23;15:1433224. doi: 10.3389/fmicb.2024.1433224 (PMC11459464; doi:10.3389/fmicb.2024.1433224)
Supplement: Supplementary file 8 [file Table_7.XLSX]

## Sheet: archaea_STANDARD_ORIGINAL
Module completeness for archaea with STANDARD KEGG cutoffs and ORIGINAL KEGG modules
Module	#_KOs_in_module	#Reactions_in_module	0%_present	<50%_present	>=50%-<75%_present	>=75%-<100%_present	100%_present	KO_cutoffs	Taxonomy_(Class)_0%_present	Taxonomy_(Class)_<50%_present	Taxonomy_(Class)_>=50%-<75%_present	Taxonomy_(Class)_>=75%-<100%_present	Taxonomy_(Class)_100%_present
M00005|PRPP_biosynthesis_ribose_5P_=>_PRPP	1	1	641	0	0	0	2337	K00948:67.53	Unclassified_Nitrososphaerota:106|Unclassified_Archaea:101|Unclassified_Euryarchaeota:77|Halobacteria:42|Unclassified_Thermoproteota:38|Unclassified_Candidatus_Aenigmatarchaeota:32|Thermoprotei:25|Unclassified_Candidatus_Parvarchaeota:24|Methanomicrobia:23|Methanobacteria:22|Unclassified_Candidatus_Bathyarchaeota:19|Nitrososphaeria:16|Unclassified_Candidatus_Micrarchaeota:15|Thermoplasmata:15|Unc…	-	-	-	Halobacteria:616|Methanomicrobia:300|Thermoprotei:286|Methanobacteria:235|Unclassified_Nitrososphaerota:158|Unclassified_Archaea:92|Thermococci:84|Unclassified_Euryarchaeota:81|Thermoplasmata:73|Unclassified_Thermoproteota:51|Methanococci:45|Nitrososphaeria:41|Unclassified_Candidatus_Micrarchaeota:34|Archaeoglobi:33|Unclassified_Candidatus_Bathyarchaeota:33|Unclassified_Candidatus_Woesearchaeota:…
M00052|Pyrimidine_ribonucleotide_biosynthesis_UMP_=>_UDP/UTPCDP/CTP	6	3	217	366	558	0	1837	K13800,K13809,K09903:268.87,113.47,90.90|K00940,K18533:143.63,278.87|K01937:103.37	Unclassified_Euryarchaeota:47|Unclassified_Nitrososphaerota:41|Unclassified_Archaea:38|Unclassified_Thermoproteota:16|Unclassified_Nanoarchaeota:11|Unclassified_Candidatus_Bathyarchaeota:9|Methanomicrobia:8|Thermoplasmata:6|Unclassified_Candidatus_Parvarchaeota:6|Unclassified_Candidatus_Woesearchaeota:5|Unclassified_Candidatus_Aenigmatarchaeota:5|Nitrososphaeria:4|Archaeoglobi:4|Thermoprotei:3|Ca…	Unclassified_Archaea:65|Unclassified_Nitrososphaerota:57|Unclassified_Euryarchaeota:43|Unclassified_Thermoproteota:31|Thermoprotei:20|Methanomicrobia:19|Unclassified_Candidatus_Micrarchaeota:15|Unclassified_Candidatus_Bathyarchaeota:15|Halobacteria:15|Unclassified_Candidatus_Aenigmatarchaeota:14|Nitrososphaeria:11|Thermoplasmata:10|Unclassified_Candidatus_Parvarchaeota:10|Unclassified_Candidatus_…	Unclassified_Nitrososphaerota:78|Thermoprotei:64|Unclassified_Archaea:55|Halobacteria:50|Unclassified_Euryarchaeota:36|Methanobacteria:30|Methanomicrobia:27|Unclassified_Candidatus_Micrarchaeota:23|Unclassified_Candidatus_Bathyarchaeota:22|Thermoplasmata:20|Unclassified_Candidatus_Woesearchaeota:18|Unclassified_Candidatus_Aenigmatarchaeota:18|Unclassified_Thermoproteota:16|Unclassified_Candidatus…	-	Halobacteria:592|Methanomicrobia:269|Methanobacteria:225|Thermoprotei:224|Unclassified_Nitrososphaerota:88|Thermococci:81|Thermoplasmata:52|Methanococci:45|Nitrososphaeria:37|Unclassified_Archaea:35|Unclassified_Euryarchaeota:32|Archaeoglobi:28|Unclassified_Thermoproteota:26|Candidatus_Poseidoniia:13|Unclassified_Candidatus_Woesearchaeota:11|Unclassified_Candidatus_Micrarchaeota:11|Unclassified_C…
M00916|Pyridoxal-P_biosynthesis_R5P_+_glyceraldehyde-3P_+_glutamine_=>_pyridoxal-P	2	1	980	0	162	0	1836	K06215+K08681:139.37+82.77	Unclassified_Archaea:156|Unclassified_Nitrososphaerota:119|Methanobacteria:105|Thermoprotei:79|Unclassified_Euryarchaeota:68|Unclassified_Thermoproteota:59|Unclassified_Candidatus_Bathyarchaeota:44|Unclassified_Candidatus_Micrarchaeota:41|Unclassified_Candidatus_Aenigmatarchaeota:41|Unclassified_Candidatus_Woesearchaeota:39|Unclassified_Candidatus_Parvarchaeota:26|Methanomicrobia:20|Thermoplasmat…	-	Unclassified_Euryarchaeota:35|Halobacteria:35|Methanomicrobia:20|Unclassified_Nitrososphaerota:15|Candidatus_Poseidoniia:12|Thermoplasmata:12|Thermoprotei:6|Unclassified_Candidatus_Altiarchaeota:6|Unclassified_Archaea:4|Unclassified_Candidatus_Micrarchaeota:4|Methanobacteria:3|Unclassified_Candidatus_Woesearchaeota:3|Hadesarchaea:1|Methanococci:1|Candidatus_Methanoliparia:1|Unclassified_Candidatu…	-	Halobacteria:606|Methanomicrobia:283|Thermoprotei:226|Methanobacteria:149|Unclassified_Nitrososphaerota:130|Thermococci:75|Thermoplasmata:57|Unclassified_Euryarchaeota:55|Methanococci:44|Nitrososphaeria:40|Unclassified_Archaea:33|Unclassified_Thermoproteota:30|Archaeoglobi:29|Unclassified_Candidatus_Altiarchaeota:12|Unclassified_Candidatus_Marsarchaeota:8|Candidatus_Poseidoniia:8|Unclassified_Can…
M00844|Arginine_biosynthesis_ornithine_=>_arginine	4	3	517	453	308	0	1700	K00611:367.07|K01940:125.93|K01755,K14681:178.73,965.53	Unclassified_Archaea:105|Unclassified_Euryarchaeota:80|Unclassified_Nitrososphaerota:52|Unclassified_Candidatus_Woesearchaeota:31|Unclassified_Thermoproteota:31|Unclassified_Candidatus_Aenigmatarchaeota:30|Unclassified_Candidatus_Parvarchaeota:26|Unclassified_Candidatus_Micrarchaeota:25|Unclassified_Nanoarchaeota:17|Thermoprotei:16|Thermoplasmata:16|Halobacteria:15|Unclassified_Candidatus_Bathyar…	Thermococci:70|Thermoprotei:64|Unclassified_Nitrososphaerota:47|Unclassified_Euryarchaeota:37|Unclassified_Archaea:35|Thermoplasmata:32|Unclassified_Thermoproteota:30|Candidatus_Poseidoniia:18|Unclassified_Candidatus_Micrarchaeota:15|Methanomicrobia:14|Halobacteria:12|Nitrososphaeria:11|Unclassified_Candidatus_Bathyarchaeota:9|Unclassified_Candidatus_Aenigmatarchaeota:8|Unclassified_Candidatus_Th…	Unclassified_Nitrososphaerota:63|Halobacteria:47|Methanomicrobia:31|Unclassified_Archaea:27|Methanobacteria:25|Thermoprotei:23|Unclassified_Candidatus_Bathyarchaeota:16|Nitrososphaeria:13|Thermoplasmata:13|Unclassified_Euryarchaeota:12|Unclassified_Candidatus_Altiarchaeota:8|Unclassified_Thermoproteota:6|Archaeoglobi:4|Unclassified_Candidatus_Micrarchaeota:4|Unclassified_Candidatus_Woesearchaeota…	-	Halobacteria:584|Methanomicrobia:271|Methanobacteria:228|Thermoprotei:208|Unclassified_Nitrososphaerota:102|Methanococci:45|Unclassified_Euryarchaeota:29|Thermoplasmata:27|Nitrososphaeria:27|Unclassified_Archaea:26|Archaeoglobi:26|Unclassified_Thermoproteota:22|Unclassified_Candidatus_Bathyarchaeota:14|Thermococci:14|Unclassified_Candidatus_Altiarchaeota:8|Unclassified_Candidatus_Marsarchaeota:8|…
M00049|Adenine_ribonucleotide_biosynthesis_IMP_=>_ADPATP	7	4	215	352	325	435	1651	K01939:97.97|K01756:306.23|K00939,K18532,K18533,K00944:189.13,64.63,278.87,360.37|K00940:143.63	Unclassified_Archaea:45|Unclassified_Nitrososphaerota:41|Unclassified_Euryarchaeota:37|Unclassified_Thermoproteota:27|Unclassified_Candidatus_Aenigmatarchaeota:8|Unclassified_Nanoarchaeota:8|Nitrososphaeria:8|Unclassified_Candidatus_Parvarchaeota:6|Unclassified_Candidatus_Woesearchaeota:5|Thermoprotei:5|Unclassified_Candidatus_Micrarchaeota:4|Thermoplasmata:4|Unclassified_Candidatus_Diapherotrite…	Unclassified_Archaea:66|Unclassified_Nitrososphaerota:58|Thermoprotei:41|Unclassified_Euryarchaeota:40|Unclassified_Candidatus_Aenigmatarchaeota:20|Unclassified_Candidatus_Parvarchaeota:18|Unclassified_Candidatus_Micrarchaeota:16|Unclassified_Thermoproteota:13|Unclassified_Candidatus_Woesearchaeota:12|Methanomicrobia:11|Unclassified_Candidatus_Bathyarchaeota:10|Archaeoglobi:6|Halobacteria:6|Uncla…	Thermoprotei:52|Unclassified_Nitrososphaerota:42|Unclassified_Archaea:36|Unclassified_Candidatus_Micrarchaeota:21|Unclassified_Euryarchaeota:21|Unclassified_Candidatus_Woesearchaeota:15|Halobacteria:15|Thermoplasmata:15|Methanomicrobia:12|Unclassified_Thermoproteota:11|Unclassified_Candidatus_Bathyarchaeota:11|Nitrososphaeria:8|Unclassified_Candidatus_Marsarchaeota:6|Methanobacteria:6|Unclassifie…	Unclassified_Nitrososphaerota:63|Halobacteria:60|Methanobacteria:35|Thermoprotei:35|Unclassified_Euryarchaeota:34|Methanomicrobia:34|Unclassified_Archaea:27|Unclassified_Candidatus_Bathyarchaeota:25|Unclassified_Thermoproteota:18|Thermoplasmata:18|Candidatus_Poseidoniia:11|Unclassified_Candidatus_Altiarchaeota:10|Unclassified_Candidatus_Woesearchaeota:8|Nitrososphaeria:6|Unclassified_Candidatus_L…	Halobacteria:575|Methanomicrobia:263|Methanobacteria:216|Thermoprotei:178|Thermococci:81|Unclassified_Nitrososphaerota:60|Thermoplasmata:45|Methanococci:44|Nitrososphaeria:34|Archaeoglobi:27|Unclassified_Euryarchaeota:26|Unclassified_Thermoproteota:20|Unclassified_Archaea:19|Candidatus_Methanofastidiosa:7|Candidatus_Poseidoniia:6|Unclassified_Candidatus_Aenigmatarchaeota:5|Candidatus_Methanolipar…
M00896|Thiamine_biosynthesis_archaea_AIR_(+_NAD+)_=>_TMP/TPP	1	1	1398	0	0	0	1580	K22699:265.90	Methanobacteria:176|Unclassified_Archaea:159|Unclassified_Nitrososphaerota:142|Unclassified_Euryarchaeota:126|Halobacteria:113|Thermoprotei:78|Unclassified_Thermoproteota:68|Thermoplasmata:68|Methanomicrobia:63|Unclassified_Candidatus_Micrarchaeota:49|Unclassified_Candidatus_Woesearchaeota:43|Unclassified_Candidatus_Aenigmatarchaeota:41|Unclassified_Candidatus_Bathyarchaeota:40|Unclassified_Candi…	-	-	-	Halobacteria:545|Methanomicrobia:260|Thermoprotei:233|Unclassified_Nitrososphaerota:122|Methanobacteria:81|Thermococci:61|Nitrososphaeria:47|Methanococci:44|Unclassified_Archaea:34|Unclassified_Euryarchaeota:32|Archaeoglobi:28|Unclassified_Thermoproteota:21|Thermoplasmata:20|Unclassified_Candidatus_Bathyarchaeota:12|Unclassified_Candidatus_Altiarchaeota:10|Hadesarchaea:6|Methanonatronarchaeia:3|U…
M00133|Polyamine_biosynthesis_arginine_=>_agmatine_=>_putrescine_=>_spermidine	5	2	587	0	838	0	1553	K01583,K01584,K01585,K02626:589.27,865.03,227.97,89.60|K01480:220.13	Unclassified_Archaea:103|Unclassified_Euryarchaeota:92|Unclassified_Nitrososphaerota:81|Thermoprotei:45|Unclassified_Thermoproteota:43|Unclassified_Candidatus_Aenigmatarchaeota:36|Unclassified_Candidatus_Woesearchaeota:30|Methanomicrobia:15|Halobacteria:14|Methanobacteria:13|Unclassified_Candidatus_Diapherotrites:12|Unclassified_Nanoarchaeota:12|Thermoplasmata:12|Candidatus_Poseidoniia:11|Unclass…	-	Thermoprotei:256|Unclassified_Nitrososphaerota:93|Methanomicrobia:83|Unclassified_Archaea:63|Halobacteria:50|Unclassified_Candidatus_Micrarchaeota:38|Unclassified_Thermoproteota:36|Unclassified_Euryarchaeota:31|Thermoplasmata:22|Unclassified_Candidatus_Bathyarchaeota:21|Unclassified_Candidatus_Parvarchaeota:18|Methanobacteria:18|Nitrososphaeria:15|Candidatus_Poseidoniia:12|Unclassified_Candidatus…	-	Halobacteria:594|Methanobacteria:226|Methanomicrobia:225|Unclassified_Nitrososphaerota:90|Thermococci:82|Thermoplasmata:54|Methanococci:44|Nitrososphaeria:36|Unclassified_Euryarchaeota:35|Archaeoglobi:28|Unclassified_Archaea:27|Unclassified_Candidatus_Bathyarchaeota:25|Thermoprotei:10|Unclassified_Thermoproteota:10|Candidatus_Methanofastidiosa:8|Unclassified_Candidatus_Marsarchaeota:8|Unclassifie…
M00880|Molybdenum_cofactor_biosynthesis_GTP_=>_molybdenum_cofactor	9	5	846	176	133	350	1473	K03639,K20967:135.00,714.63|K03637,K20967:68.13,714.63|K03635,K21142:35.20,201.63|K03831,K03638,K15376:219.20,160.30,392.17|K03750,K15376:184.13,392.17	Unclassified_Nitrososphaerota:203|Unclassified_Archaea:131|Unclassified_Euryarchaeota:74|Thermoplasmata:54|Unclassified_Candidatus_Micrarchaeota:49|Unclassified_Thermoproteota:49|Nitrososphaeria:45|Unclassified_Candidatus_Woesearchaeota:42|Unclassified_Candidatus_Aenigmatarchaeota:40|Unclassified_Candidatus_Parvarchaeota:27|Methanobacteria:21|Unclassified_Nanoarchaeota:17|Unclassified_Candidatus_…	Unclassified_Euryarchaeota:32|Halobacteria:22|Thermoprotei:22|Unclassified_Nitrososphaerota:17|Methanomicrobia:16|Unclassified_Archaea:15|Unclassified_Thermoproteota:11|Unclassified_Candidatus_Bathyarchaeota:9|Archaeoglobi:8|Candidatus_Poseidoniia:5|Methanobacteria:4|Thermoplasmata:3|Unclassified_Candidatus_Geoarchaeota:2|Unclassified_Candidatus_Thermoplasmatota:2|Unclassified_Candidatus_Marsarch…	Methanobacteria:19|Halobacteria:19|Thermoprotei:17|Methanomicrobia:16|Unclassified_Archaea:10|Unclassified_Euryarchaeota:10|Unclassified_Nitrososphaerota:9|Unclassified_Candidatus_Altiarchaeota:6|Unclassified_Thermoproteota:6|Unclassified_Candidatus_Bathyarchaeota:5|Candidatus_Poseidoniia:3|Thermoplasmata:3|Archaeoglobi:2|Conexivisphaeria:1|Nitrososphaeria:1|Unclassified_Candidatus_Geothermarchae…	Thermoprotei:91|Halobacteria:44|Methanobacteria:41|Methanomicrobia:32|Thermoplasmata:22|Unclassified_Euryarchaeota:21|Unclassified_Nitrososphaerota:17|Unclassified_Archaea:12|Unclassified_Thermoproteota:11|Nitrososphaeria:10|Unclassified_Candidatus_Bathyarchaeota:9|Unclassified_Candidatus_Altiarchaeota:6|Candidatus_Poseidoniia:6|Archaeoglobi:5|Methanococci:3|Hadesarchaea:3|Methanopyri:3|Thermococ…	Halobacteria:565|Methanomicrobia:251|Thermoprotei:176|Methanobacteria:172|Thermococci:82|Methanococci:42|Unclassified_Archaea:25|Unclassified_Candidatus_Bathyarchaeota:24|Archaeoglobi:23|Unclassified_Euryarchaeota:21|Unclassified_Nitrososphaerota:18|Unclassified_Thermoproteota:12|Candidatus_Poseidoniia:8|Unclassified_Candidatus_Marsarchaeota:7|Thermoplasmata:6|Unclassified_Candidatus_Korarchaeota…
M00019|Valine/isoleucine_biosynthesis_pyruvate_=>_valine_/_2-oxobutanoate_=>_isoleucine	6	4	613	374	394	329	1268	K01652+K11258,K01652+K01653:506.93+60.97,506.93+49.87|K00053:116.13|K01687:585.33|K00826:171.70	Unclassified_Archaea:113|Thermococci:79|Unclassified_Euryarchaeota:70|Thermoprotei:43|Unclassified_Candidatus_Aenigmatarchaeota:38|Thermoplasmata:35|Unclassified_Thermoproteota:34|Unclassified_Candidatus_Woesearchaeota:29|Unclassified_Nitrososphaerota:29|Unclassified_Candidatus_Parvarchaeota:26|Unclassified_Candidatus_Micrarchaeota:18|Unclassified_Nanoarchaeota:17|Unclassified_Candidatus_Bathyarc…	Unclassified_Nitrososphaerota:61|Thermoprotei:54|Unclassified_Euryarchaeota:50|Halobacteria:39|Unclassified_Archaea:28|Unclassified_Thermoproteota:23|Thermoplasmata:19|Unclassified_Candidatus_Micrarchaeota:18|Candidatus_Poseidoniia:15|Methanomicrobia:12|Unclassified_Candidatus_Woesearchaeota:9|Unclassified_Candidatus_Bathyarchaeota:9|Unclassified_Candidatus_Thorarchaeota:4|Unclassified_Candidatus…	Thermoprotei:177|Unclassified_Nitrososphaerota:55|Halobacteria:32|Methanomicrobia:17|Thermoplasmata:14|Nitrososphaeria:12|Methanobacteria:12|Unclassified_Thermoproteota:11|Unclassified_Archaea:10|Unclassified_Candidatus_Micrarchaeota:9|Unclassified_Candidatus_Bathyarchaeota:8|Thermococci:7|Unclassified_Euryarchaeota:5|Candidatus_Micrarchaeia:4|Archaeoglobi:4|Unclassified_Candidatus_Marsarchaeota:…	Halobacteria:50|Unclassified_Nitrososphaerota:49|Methanobacteria:44|Thermoprotei:37|Methanomicrobia:31|Unclassified_Euryarchaeota:21|Unclassified_Archaea:20|Unclassified_Thermoproteota:12|Unclassified_Candidatus_Bathyarchaeota:11|Thermoplasmata:10|Nitrososphaeria:9|Unclassified_Candidatus_Altiarchaeota:6|Candidatus_Methanofastidiosa:6|Archaeoglobi:4|Unclassified_Candidatus_Marsarchaeota:4|Candida…	Halobacteria:530|Methanomicrobia:255|Methanobacteria:201|Unclassified_Nitrososphaerota:70|Methanococci:44|Nitrososphaeria:33|Archaeoglobi:25|Unclassified_Archaea:22|Unclassified_Candidatus_Bathyarchaeota:12|Unclassified_Euryarchaeota:12|Thermoplasmata:10|Unclassified_Thermoproteota:9|Unclassified_Candidatus_Altiarchaeota:8|Unclassified_Candidatus_Verstraetearchaeota:6|Unclassified_Candidatus_Micr…
M00307|Pyruvate_oxidation_pyruvate_=>_acetyl-CoA	11	1	778	754	76	104	1266	K00163+K00627+K00382,K00169+K00170+K00171+K00172,K03737,K00169+K00170+K00171+K00189,K00161+K00162+K00627+K00382:346.10+484.27+457.27,290.13+313.30+100.10+151.70,427.13,290.13+313.30+100.10+295.23,431.83+491.50+484.27+457.27	Unclassified_Nitrososphaerota:219|Unclassified_Archaea:125|Unclassified_Euryarchaeota:70|Nitrososphaeria:55|Halobacteria:55|Unclassified_Thermoproteota:52|Unclassified_Candidatus_Aenigmatarchaeota:28|Unclassified_Candidatus_Parvarchaeota:26|Unclassified_Candidatus_Woesearchaeota:23|Thermoprotei:20|Unclassified_Candidatus_Micrarchaeota:16|Unclassified_Nanoarchaeota:16|Methanomicrobia:13|Thermoplas…	Halobacteria:589|Unclassified_Candidatus_Micrarchaeota:20|Unclassified_Archaea:19|Thermoplasmata:19|Unclassified_Euryarchaeota:16|Unclassified_Nitrososphaerota:15|Unclassified_Thermoproteota:10|Unclassified_Candidatus_Marsarchaeota:10|Candidatus_Poseidoniia:9|Methanobacteria:7|Thermoprotei:5|Methanomicrobia:5|Unclassified_Candidatus_Woesearchaeota:5|Candidatus_Nanohaloarchaea:4|Candidatus_Micrarc…	Unclassified_Euryarchaeota:26|Candidatus_Poseidoniia:10|Methanobacteria:6|Thermoplasmata:6|Unclassified_Archaea:5|Unclassified_Candidatus_Altiarchaeota:4|Thermoprotei:4|Methanomicrobia:2|Unclassified_Candidatus_Diapherotrites:2|Unclassified_Nitrososphaerota:2|Unclassified_Candidatus_Micrarchaeota:1|Candidatus_Methanomethylicia:1|Archaeoglobi:1|Hadesarchaea:1|Unclassified_Candidatus_Parvarchaeota:…	Methanobacteria:17|Thermoprotei:12|Methanomicrobia:10|Thermoplasmata:7|Archaeoglobi:7|Unclassified_Euryarchaeota:6|Unclassified_Nitrososphaerota:6|Unclassified_Candidatus_Woesearchaeota:5|Unclassified_Archaea:5|Unclassified_Candidatus_Bathyarchaeota:5|Unclassified_Candidatus_Altiarchaeota:4|Thermococci:3|Unclassified_Candidatus_Diapherotrites:3|Unclassified_Candidatus_Lokiarchaeota:2|Hadesarchaea…	Methanomicrobia:293|Thermoprotei:270|Methanobacteria:224|Thermococci:82|Methanococci:45|Thermoplasmata:43|Unclassified_Euryarchaeota:40|Unclassified_Archaea:39|Unclassified_Candidatus_Bathyarchaeota:34|Archaeoglobi:26|Unclassified_Thermoproteota:25|Unclassified_Nitrososphaerota:22|Halobacteria:14|Unclassified_Candidatus_Micrarchaeota:11|Unclassified_Candidatus_Woesearchaeota:10|Unclassified_Candi…
M00031|Lysine_biosynthesis_mediated_by_LysW_2-aminoadipate_=>_lysine	1	1	1726	0	0	0	1252	K05826:36.47	Methanomicrobia:323|Methanobacteria:257|Unclassified_Euryarchaeota:152|Unclassified_Archaea:147|Unclassified_Nitrososphaerota:93|Thermoplasmata:79|Thermoprotei:73|Thermococci:66|Unclassified_Candidatus_Micrarchaeota:49|Unclassified_Thermoproteota:48|Methanococci:45|Halobacteria:45|Unclassified_Candidatus_Aenigmatarchaeota:41|Unclassified_Candidatus_Woesearchaeota:40|Archaeoglobi:38|Unclassified_C…	-	-	-	Halobacteria:613|Thermoprotei:238|Unclassified_Nitrososphaerota:171|Unclassified_Archaea:46|Nitrososphaeria:41|Unclassified_Thermoproteota:41|Unclassified_Candidatus_Bathyarchaeota:23|Thermococci:20|Thermoplasmata:9|Candidatus_Methanofastidiosa:8|Unclassified_Euryarchaeota:6|Unclassified_Candidatus_Verstraetearchaeota:6|Candidatus_Methanomethylicia:5|Unclassified_Candidatus_Korarchaeota:5|Unclass…
M00763|Ornithine_biosynthesis_mediated_by_LysW_glutamate_=>_ornithine	1	1	1726	0	0	0	1252	K05826:36.47	Methanomicrobia:323|Methanobacteria:257|Unclassified_Euryarchaeota:152|Unclassified_Archaea:147|Unclassified_Nitrososphaerota:93|Thermoplasmata:79|Thermoprotei:73|Thermococci:66|Unclassified_Candidatus_Micrarchaeota:49|Unclassified_Thermoproteota:48|Methanococci:45|Halobacteria:45|Unclassified_Candidatus_Aenigmatarchaeota:41|Unclassified_Candidatus_Woesearchaeota:40|Archaeoglobi:38|Unclassified_C…	-	-	-	Halobacteria:613|Thermoprotei:238|Unclassified_Nitrososphaerota:171|Unclassified_Archaea:46|Nitrososphaeria:41|Unclassified_Thermoproteota:41|Unclassified_Candidatus_Bathyarchaeota:23|Thermococci:20|Thermoplasmata:9|Candidatus_Methanofastidiosa:8|Unclassified_Euryarchaeota:6|Unclassified_Candidatus_Verstraetearchaeota:6|Candidatus_Methanomethylicia:5|Unclassified_Candidatus_Korarchaeota:5|Unclass…
M00002|Glycolysis_core_module_involving_three-carbon_compounds	12	6	157	427	545	610	1239	K01803:29.33|K00134,K00150,K11389:425.43,334.77,626.87|K00927,K11389:204.47,626.87|K01834,K15633,K15634,K15635:147.67,78.67,200.73,119.13|K01689:70.27|K00873,K12406:45.70,1009.83	Unclassified_Euryarchaeota:39|Unclassified_Archaea:26|Unclassified_Candidatus_Micrarchaeota:21|Unclassified_Nitrososphaerota:16|Unclassified_Candidatus_Aenigmatarchaeota:9|Unclassified_Thermoproteota:9|Unclassified_Candidatus_Woesearchaeota:6|Thermoplasmata:4|Candidatus_Micrarchaeia:4|Unclassified_Candidatus_Parvarchaeota:4|Nitrososphaeria:3|Unclassified_Nanoarchaeota:3|Candidatus_Poseidoniia:3|A…	Unclassified_Nitrososphaerota:101|Unclassified_Archaea:78|Unclassified_Euryarchaeota:55|Unclassified_Thermoproteota:27|Nitrososphaeria:16|Methanomicrobia:15|Thermoprotei:15|Unclassified_Candidatus_Aenigmatarchaeota:14|Thermoplasmata:14|Unclassified_Candidatus_Bathyarchaeota:13|Unclassified_Candidatus_Woesearchaeota:10|Halobacteria:9|Unclassified_Nanoarchaeota:8|Unclassified_Candidatus_Diapherotri…	Unclassified_Nitrososphaerota:128|Unclassified_Archaea:48|Methanomicrobia:43|Halobacteria:42|Unclassified_Euryarchaeota:34|Thermoprotei:32|Nitrososphaeria:26|Unclassified_Thermoproteota:24|Thermoplasmata:21|Methanobacteria:21|Unclassified_Candidatus_Parvarchaeota:16|Unclassified_Candidatus_Micrarchaeota:13|Candidatus_Poseidoniia:13|Unclassified_Candidatus_Woesearchaeota:10|Unclassified_Candidatus…	Methanobacteria:157|Methanomicrobia:88|Halobacteria:85|Thermoprotei:37|Unclassified_Archaea:27|Thermoplasmata:27|Unclassified_Candidatus_Bathyarchaeota:23|Unclassified_Euryarchaeota:23|Archaeoglobi:19|Unclassified_Candidatus_Woesearchaeota:15|Unclassified_Thermoproteota:12|Nitrososphaeria:11|Methanococci:11|Unclassified_Nitrososphaerota:9|Unclassified_Candidatus_Aenigmatarchaeota:9|Unclassified_C…	Halobacteria:521|Thermoprotei:226|Methanomicrobia:176|Thermococci:83|Methanobacteria:79|Methanococci:34|Thermoplasmata:22|Unclassified_Thermoproteota:17|Unclassified_Archaea:14|Unclassified_Nitrososphaerota:10|Unclassified_Euryarchaeota:7|Archaeoglobi:6|Unclassified_Candidatus_Marsarchaeota:6|Unclassified_Candidatus_Bathyarchaeota:5|Unclassified_Candidatus_Lokiarchaeota:5|Unclassified_Candidatus_…
M00580|Pentose_phosphate_pathway_archaea_fructose_6P_=>_ribose_5P	5	3	618	1071	221	0	1068	K08094,K13831:102.50,309.07|K08093,K13812,K13831:169.87,352.77,309.07|K01807:51.03	Unclassified_Archaea:121|Unclassified_Nitrososphaerota:101|Unclassified_Euryarchaeota:68|Unclassified_Candidatus_Woesearchaeota:42|Unclassified_Candidatus_Micrarchaeota:42|Unclassified_Thermoproteota:42|Unclassified_Candidatus_Aenigmatarchaeota:38|Halobacteria:33|Unclassified_Candidatus_Parvarchaeota:24|Unclassified_Nanoarchaeota:17|Nitrososphaeria:13|Thermoplasmata:13|Methanomicrobia:8|Nanohaloa…	Halobacteria:624|Unclassified_Nitrososphaerota:148|Unclassified_Archaea:45|Unclassified_Euryarchaeota:45|Nitrososphaeria:41|Thermoplasmata:29|Unclassified_Candidatus_Bathyarchaeota:21|Candidatus_Poseidoniia:20|Thermoprotei:18|Unclassified_Thermoproteota:16|Unclassified_Candidatus_Marsarchaeota:9|Unclassified_Candidatus_Diapherotrites:7|Methanococci:6|Unclassified_Candidatus_Thorarchaeota:5|Unclas…	Thermoprotei:43|Methanobacteria:32|Methanomicrobia:20|Unclassified_Thermoproteota:18|Unclassified_Archaea:15|Unclassified_Euryarchaeota:15|Unclassified_Candidatus_Bathyarchaeota:13|Unclassified_Nitrososphaerota:11|Thermoplasmata:8|Unclassified_Candidatus_Verstraetearchaeota:6|Candidatus_Methanoliparia:5|Unclassified_Candidatus_Lokiarchaeota:3|Candidatus_Methanomethylicia:3|Thermococci:3|Unclassif…	-	Methanomicrobia:291|Thermoprotei:245|Methanobacteria:223|Thermococci:82|Methanococci:39|Thermoplasmata:38|Unclassified_Euryarchaeota:30|Archaeoglobi:30|Unclassified_Thermoproteota:13|Unclassified_Candidatus_Bathyarchaeota:13|Unclassified_Candidatus_Altiarchaeota:12|Unclassified_Archaea:12|Candidatus_Methanofastidiosa:8|Unclassified_Nitrososphaerota:4|Unclassified_Candidatus_Thermoplasmatota:3|Met…
M00159|V/A-type_ATPase_prokaryotes	9	1	514	402	391	650	1021	K02117+K02118+K02119+K02120+K02121+K02122+K02107+K02123+K02124:816.57+701.50+114.40+161.70+96.63+59.03+41.80+309.70+58.17	Unclassified_Archaea:115|Unclassified_Nitrososphaerota:68|Unclassified_Euryarchaeota:61|Unclassified_Thermoproteota:42|Unclassified_Candidatus_Aenigmatarchaeota:39|Unclassified_Candidatus_Woesearchaeota:32|Unclassified_Candidatus_Bathyarchaeota:29|Thermoprotei:18|Unclassified_Nanoarchaeota:16|Methanobacteria:14|Thermoplasmata:10|Unclassified_Candidatus_Parvarchaeota:10|Halobacteria:9|Unclassified…	Thermoprotei:130|Unclassified_Nitrososphaerota:65|Unclassified_Archaea:32|Methanobacteria:26|Unclassified_Euryarchaeota:21|Unclassified_Thermoproteota:20|Halobacteria:20|Methanomicrobia:17|Unclassified_Candidatus_Bathyarchaeota:16|Nitrososphaeria:11|Unclassified_Candidatus_Altiarchaeota:7|Unclassified_Candidatus_Lokiarchaeota:6|Thermoplasmata:5|Unclassified_Candidatus_Woesearchaeota:4|Unclassifie…	Thermoprotei:142|Halobacteria:42|Unclassified_Nitrososphaerota:36|Methanobacteria:22|Thermoplasmata:22|Unclassified_Archaea:21|Unclassified_Euryarchaeota:15|Unclassified_Thermoproteota:15|Unclassified_Candidatus_Parvarchaeota:12|Methanomicrobia:10|Unclassified_Candidatus_Altiarchaeota:8|Unclassified_Candidatus_Verstraetearchaeota:6|Unclassified_Candidatus_Micrarchaeota:5|Nitrososphaeria:4|Unclass…	Halobacteria:106|Methanomicrobia:88|Unclassified_Nitrososphaerota:66|Unclassified_Euryarchaeota:51|Methanobacteria:51|Thermoplasmata:46|Methanococci:35|Unclassified_Candidatus_Micrarchaeota:29|Unclassified_Archaea:24|Nitrososphaeria:23|Thermoprotei:21|Candidatus_Poseidoniia:14|Unclassified_Thermoproteota:10|Candidatus_Methanofastidiosa:7|Thermococci:7|Archaeoglobi:6|Unclassified_Candidatus_Bathya…	Halobacteria:481|Methanomicrobia:203|Methanobacteria:144|Thermococci:78|Unclassified_Nitrososphaerota:29|Archaeoglobi:23|Nitrososphaeria:14|Unclassified_Euryarchaeota:10|Methanococci:9|Thermoplasmata:5|Unclassified_Candidatus_Micrarchaeota:4|Candidatus_Methanoliparia:3|Unclassified_Thermoproteota:2|Theionarchaea:2|Unclassified_Candidatus_Thorarchaeota:2|Nanohaloarchaea:2|Candidatus_Nanohaloarchae…
M00378|F420_biosynthesis_archaea	2	1	1133	244	282	334	985	K11780+K11781:409.80+478.87	Thermoprotei:298|Unclassified_Archaea:133|Unclassified_Euryarchaeota:128|Thermoplasmata:87|Thermococci:85|Unclassified_Nitrososphaerota:51|Unclassified_Candidatus_Micrarchaeota:48|Unclassified_Thermoproteota:46|Unclassified_Candidatus_Woesearchaeota:43|Unclassified_Candidatus_Aenigmatarchaeota:41|Unclassified_Candidatus_Parvarchaeota:27|Candidatus_Poseidoniia:23|Unclassified_Candidatus_Altiarchae…	Unclassified_Nitrososphaerota:61|Unclassified_Candidatus_Bathyarchaeota:31|Methanomicrobia:20|Unclassified_Archaea:18|Unclassified_Thermoproteota:14|Unclassified_Euryarchaeota:12|Thermoprotei:11|Halobacteria:11|Unclassified_Candidatus_Marsarchaeota:8|Unclassified_Candidatus_Lokiarchaeota:7|Unclassified_Candidatus_Verstraetearchaeota:6|Unclassified_Candidatus_Thorarchaeota:5|Methanobacteria:5|Cand…	Unclassified_Nitrososphaerota:61|Methanomicrobia:41|Unclassified_Archaea:32|Halobacteria:32|Methanobacteria:29|Unclassified_Thermoproteota:24|Nitrososphaeria:15|Unclassified_Euryarchaeota:8|Archaeoglobi:8|Candidatus_Methanofastidiosa:7|Unclassified_Candidatus_Bathyarchaeota:6|Unclassified_Candidatus_Marsarchaeota:4|Methanonatronarchaeia:3|Theionarchaea:2|Thermoprotei:2|Conexivisphaeria:1|Unclassi…	Methanobacteria:174|Methanomicrobia:57|Halobacteria:47|Unclassified_Nitrososphaerota:16|Archaeoglobi:11|Nitrososphaeria:8|Methanococci:7|Candidatus_Methanoliparia:4|Unclassified_Euryarchaeota:3|Unclassified_Archaea:2|Candidatus_Hadarchaeia:2|Hadesarchaea:1|Candidatus_Bathyarchaeia:1|Unclassified_Candidatus_Geoarchaeota:1	Halobacteria:564|Methanomicrobia:196|Unclassified_Nitrososphaerota:75|Methanobacteria:49|Methanococci:38|Nitrososphaeria:24|Archaeoglobi:13|Unclassified_Archaea:8|Unclassified_Euryarchaeota:7|Unclassified_Thermoproteota:5|Methanopyri:3|Candidatus_Hydrothermarchaeia:1|Unclassified_Candidatus_Hydrothermarchaeota:1|Hadesarchaea:1
M00899|Thiamine_salvage_pathway_HMP/HET_=>_TMP	1	1	2120	0	0	0	858	K00878:88.60	Halobacteria:388|Thermoprotei:271|Unclassified_Nitrososphaerota:263|Unclassified_Archaea:190|Unclassified_Euryarchaeota:146|Methanomicrobia:96|Unclassified_Thermoproteota:86|Thermoplasmata:71|Methanobacteria:63|Nitrososphaeria:57|Unclassified_Candidatus_Bathyarchaeota:52|Thermococci:50|Unclassified_Candidatus_Micrarchaeota:44|Unclassified_Candidatus_Woesearchaeota:43|Unclassified_Candidatus_Aenig…	-	-	-	Halobacteria:270|Methanomicrobia:227|Methanobacteria:194|Thermoprotei:40|Thermococci:36|Methanococci:30|Thermoplasmata:17|Archaeoglobi:14|Unclassified_Euryarchaeota:12|Unclassified_Candidatus_Micrarchaeota:5|Unclassified_Candidatus_Marsarchaeota:4|Unclassified_Thermoproteota:3|Unclassified_Archaea:3|Unclassified_Candidatus_Thermoplasmatota:1|Unclassified_Nitrososphaerota:1|Unclassified_Candidatus…
M00913|Pantothenate_biosynthesis_2-oxoisovalerate/spermine_=>_pantothenate	2	2	1282	0	861	0	835	K00606:98.07|K00077:78.27	Methanomicrobia:213|Unclassified_Archaea:163|Unclassified_Nitrososphaerota:150|Methanobacteria:118|Unclassified_Euryarchaeota:81|Unclassified_Thermoproteota:66|Thermoprotei:65|Unclassified_Candidatus_Micrarchaeota:48|Thermoplasmata:47|Unclassified_Candidatus_Woesearchaeota:40|Unclassified_Candidatus_Aenigmatarchaeota:34|Unclassified_Candidatus_Bathyarchaeota:32|Halobacteria:29|Unclassified_Candid…	-	Thermoprotei:173|Methanobacteria:139|Unclassified_Nitrososphaerota:111|Methanomicrobia:109|Unclassified_Euryarchaeota:56|Halobacteria:51|Nitrososphaeria:42|Thermoplasmata:38|Archaeoglobi:29|Methanococci:21|Unclassified_Archaea:20|Unclassified_Candidatus_Bathyarchaeota:15|Candidatus_Methanofastidiosa:8|Unclassified_Candidatus_Aenigmatarchaeota:7|Unclassified_Thermoproteota:7|Hadesarchaea:6|Unclass…	-	Halobacteria:578|Thermococci:83|Thermoprotei:73|Unclassified_Euryarchaeota:21|Unclassified_Thermoproteota:16|Candidatus_Poseidoniia:16|Unclassified_Archaea:10|Unclassified_Candidatus_Lokiarchaeota:7|Unclassified_Candidatus_Heimdallarchaeota:5|Unclassified_Candidatus_Bathyarchaeota:5|Unclassified_Candidatus_Thorarchaeota:4|Unclassified_Nitrososphaerota:3|Candidatus_Methanomethylicia:3|Thermoplasma…
M00968|Pentose_bisphosphate_pathway_(nucleoside_degradation)_archaea_nucleoside/NMP_=>_3-PGA/glycerone_phosphate	10	5	1356	539	152	103	828	K00757,K26211,K26212,K18931:94.10,494.20,343.13,590.27|K21056,K26208,K18931:309.67,261.47,590.27|K18237:287.60|K01601,K26210:330.63,285.20|K01601,K01636:330.63,274.77	Methanobacteria:251|Unclassified_Nitrososphaerota:224|Thermoprotei:184|Unclassified_Euryarchaeota:122|Unclassified_Archaea:107|Unclassified_Thermoproteota:69|Thermoplasmata:60|Nitrososphaeria:53|Methanomicrobia:37|Unclassified_Candidatus_Micrarchaeota:37|Unclassified_Candidatus_Aenigmatarchaeota:33|Unclassified_Candidatus_Woesearchaeota:25|Unclassified_Candidatus_Parvarchaeota:23|Candidatus_Posei…	Halobacteria:184|Thermoprotei:85|Unclassified_Archaea:66|Methanococci:32|Unclassified_Nitrososphaerota:29|Unclassified_Euryarchaeota:18|Unclassified_Candidatus_Woesearchaeota:16|Unclassified_Candidatus_Bathyarchaeota:16|Unclassified_Thermoproteota:10|Unclassified_Candidatus_Diapherotrites:7|Methanomicrobia:7|Archaeoglobi:6|Methanobacteria:6|Unclassified_Candidatus_Thorarchaeota:5|Unclassified_Can…	Halobacteria:75|Methanomicrobia:22|Thermoprotei:10|Unclassified_Archaea:9|Archaeoglobi:8|Unclassified_Euryarchaeota:4|Unclassified_Thermoproteota:3|Thermoplasmata:3|Unclassified_Candidatus_Heimdallarchaeota:2|Unclassified_Candidatus_Altiarchaeota:2|Methanococci:2|Unclassified_Nitrososphaerota:2|Thermococci:2|Unclassified_Candidatus_Bathyarchaeota:2|Unclassified_Candidatus_Diapherotrites:1|Unclass…	Halobacteria:41|Unclassified_Euryarchaeota:11|Methanomicrobia:9|Unclassified_Candidatus_Micrarchaeota:5|Unclassified_Archaea:5|Unclassified_Nitrososphaerota:4|Unclassified_Candidatus_Aenigmatarchaeota:3|Thermoprotei:3|Unclassified_Candidatus_Lokiarchaeota:3|Unclassified_Candidatus_Woesearchaeota:2|Candidatus_Methanofastidiosa:2|Thermoplasmata:2|Unclassified_Candidatus_Altiarchaeota:2|Unclassified…	Halobacteria:348|Methanomicrobia:248|Thermococci:81|Thermoprotei:29|Thermoplasmata:20|Archaeoglobi:18|Unclassified_Candidatus_Bathyarchaeota:13|Methanococci:11|Unclassified_Candidatus_Verstraetearchaeota:6|Unclassified_Archaea:6|Unclassified_Candidatus_Micrarchaeota:6|Candidatus_Methanofastidiosa:5|Unclassified_Nitrososphaerota:5|Unclassified_Thermoproteota:5|Candidatus_Methanomethylicia:5|Unclas…
M00086|beta-Oxidation_acyl-CoA_synthesis	2	1	2282	0	0	0	696	K01897,K15013:453.70,652.90	Methanomicrobia:317|Thermoprotei:297|Methanobacteria:257|Unclassified_Nitrososphaerota:254|Unclassified_Archaea:183|Unclassified_Euryarchaeota:147|Halobacteria:104|Thermococci:86|Unclassified_Thermoproteota:78|Thermoplasmata:73|Nitrososphaeria:57|Unclassified_Candidatus_Micrarchaeota:49|Unclassified_Candidatus_Bathyarchaeota:45|Methanococci:45|Unclassified_Candidatus_Aenigmatarchaeota:41|Unclassi…	-	-	-	Halobacteria:554|Archaeoglobi:29|Thermoplasmata:15|Thermoprotei:14|Unclassified_Euryarchaeota:11|Unclassified_Thermoproteota:11|Unclassified_Archaea:10|Unclassified_Nitrososphaerota:10|Unclassified_Candidatus_Bathyarchaeota:7|Methanomicrobia:6|Unclassified_Candidatus_Thorarchaeota:4|Unclassified_Candidatus_Heimdallarchaeota:4|Candidatus_Poseidoniia:4|Unclassified_Candidatus_Geothermarchaeota:3|Ca…
M00847|Heme_biosynthesis_archaea_siroheme_=>_heme	5	3	1432	615	256	0	675	K22225:120.27|K22226:356.80|K00435,K25033,K22227:267.80,655.70,373.00	Methanobacteria:257|Unclassified_Archaea:164|Unclassified_Euryarchaeota:143|Unclassified_Nitrososphaerota:126|Thermococci:76|Thermoplasmata:72|Unclassified_Thermoproteota:57|Methanomicrobia:54|Thermoprotei:53|Unclassified_Candidatus_Micrarchaeota:45|Methanococci:45|Unclassified_Candidatus_Woesearchaeota:43|Unclassified_Candidatus_Bathyarchaeota:40|Unclassified_Candidatus_Aenigmatarchaeota:40|Halo…	Halobacteria:169|Unclassified_Nitrososphaerota:137|Thermoprotei:93|Nitrososphaeria:42|Unclassified_Thermoproteota:29|Unclassified_Archaea:24|Methanomicrobia:22|Thermoplasmata:16|Unclassified_Candidatus_Bathyarchaeota:11|Thermococci:10|Unclassified_Euryarchaeota:8|Unclassified_Candidatus_Marsarchaeota:8|Unclassified_Candidatus_Verstraetearchaeota:6|Archaeoglobi:6|Candidatus_Methanomethylicia:5|Unc…	Halobacteria:128|Thermoprotei:57|Methanomicrobia:47|Archaeoglobi:10|Unclassified_Euryarchaeota:3|Unclassified_Archaea:3|Conexivisphaeria:1|Unclassified_Candidatus_Geothermarchaeota:1|Unclassified_Nitrososphaerota:1|Unclassified_Candidatus_Thermoplasmatota:1|Methanonatronarchaeia:1|Unclassified_Candidatus_Korarchaeota:1|Unclassified_Thermoproteota:1|Nitrososphaeria:1	-	Halobacteria:332|Methanomicrobia:200|Thermoprotei:108|Archaeoglobi:19|Unclassified_Euryarchaeota:4|Methanonatronarchaeia:2|Unclassified_Archaea:2|Unclassified_Thermoproteota:2|Unclassified_Candidatus_Geoarchaeota:1|Unclassified_Candidatus_Bathyarchaeota:1|Unclassified_Candidatus_Hydrothermarchaeota:1|Unclassified_Candidatus_Lokiarchaeota:1|Unclassified_Candidatus_Geothermarchaeota:1|Candidatus_Ba…
M00570|Isoleucine_biosynthesis_threonine_=>_2-oxobutanoate_=>_isoleucine	8	5	518	534	507	762	657	K17989,K01754:252.37,261.00|K01652+K01653,K01652+K11258:506.93+49.87,506.93+60.97|K00053:116.13|K01687:585.33|K00826:171.70	Unclassified_Archaea:108|Thermococci:71|Unclassified_Euryarchaeota:66|Unclassified_Candidatus_Aenigmatarchaeota:38|Unclassified_Candidatus_Woesearchaeota:29|Unclassified_Candidatus_Parvarchaeota:26|Thermoplasmata:25|Thermoprotei:21|Unclassified_Thermoproteota:19|Unclassified_Candidatus_Micrarchaeota:18|Unclassified_Nitrososphaerota:18|Unclassified_Nanoarchaeota:14|Unclassified_Candidatus_Bathyarc…	Unclassified_Nitrososphaerota:101|Thermoprotei:62|Unclassified_Euryarchaeota:55|Unclassified_Thermoproteota:39|Unclassified_Archaea:37|Halobacteria:36|Thermoplasmata:31|Unclassified_Candidatus_Micrarchaeota:27|Methanomicrobia:23|Candidatus_Poseidoniia:20|Unclassified_Candidatus_Woesearchaeota:12|Nitrososphaeria:11|Unclassified_Candidatus_Bathyarchaeota:11|Methanobacteria:9|Thermococci:8|Archaeogl…	Thermoprotei:194|Methanobacteria:47|Unclassified_Nitrososphaerota:45|Halobacteria:42|Methanomicrobia:33|Unclassified_Euryarchaeota:22|Thermoplasmata:22|Unclassified_Thermoproteota:16|Unclassified_Candidatus_Bathyarchaeota:16|Unclassified_Archaea:13|Nitrososphaeria:8|Thermococci:7|Unclassified_Candidatus_Altiarchaeota:6|Candidatus_Methanofastidiosa:6|Archaeoglobi:5|Unclassified_Candidatus_Lokiarch…	Methanomicrobia:230|Methanobacteria:201|Halobacteria:50|Unclassified_Nitrososphaerota:45|Methanococci:44|Thermoprotei:34|Unclassified_Archaea:32|Archaeoglobi:23|Unclassified_Euryarchaeota:14|Unclassified_Thermoproteota:13|Unclassified_Candidatus_Bathyarchaeota:12|Thermoplasmata:10|Unclassified_Candidatus_Altiarchaeota:8|Nitrososphaeria:7|Unclassified_Candidatus_Verstraetearchaeota:6|Unclassified_…	Halobacteria:527|Unclassified_Nitrososphaerota:55|Nitrososphaeria:31|Methanomicrobia:29|Unclassified_Candidatus_Marsarchaeota:4|Unclassified_Archaea:3|Unclassified_Candidatus_Bathyarchaeota:2|Unclassified_Thermoproteota:2|Archaeoglobi:2|Candidatus_Hydrothermarchaeia:1|Unclassified_Euryarchaeota:1
M00119|Pantothenate_biosynthesis_valine/L-aspartate_=>_pantothenate	3	3	586	1026	715	0	651	K00826:171.70|K00606:98.07|K00077:78.27	Unclassified_Archaea:122|Unclassified_Nitrososphaerota:65|Unclassified_Euryarchaeota:58|Unclassified_Thermoproteota:45|Thermoprotei:42|Unclassified_Candidatus_Woesearchaeota:32|Unclassified_Candidatus_Aenigmatarchaeota:32|Unclassified_Candidatus_Parvarchaeota:27|Thermoplasmata:22|Methanomicrobia:21|Unclassified_Candidatus_Micrarchaeota:17|Unclassified_Nanoarchaeota:16|Unclassified_Candidatus_Bath…	Methanomicrobia:203|Thermoprotei:191|Methanobacteria:122|Unclassified_Nitrososphaerota:98|Unclassified_Euryarchaeota:55|Unclassified_Archaea:53|Thermoplasmata:49|Halobacteria:32|Unclassified_Candidatus_Micrarchaeota:32|Unclassified_Candidatus_Bathyarchaeota:30|Methanococci:24|Unclassified_Thermoproteota:23|Nitrososphaeria:18|Unclassified_Candidatus_Altiarchaeota:13|Unclassified_Candidatus_Marsarc…	Methanobacteria:128|Unclassified_Nitrososphaerota:100|Methanomicrobia:99|Thermococci:83|Halobacteria:60|Thermoprotei:54|Nitrososphaeria:38|Unclassified_Euryarchaeota:30|Archaeoglobi:26|Methanococci:21|Thermoplasmata:15|Unclassified_Thermoproteota:11|Unclassified_Candidatus_Bathyarchaeota:10|Unclassified_Archaea:9|Candidatus_Poseidoniia:6|Candidatus_Methanoliparia:5|Hadesarchaea:4|Unclassified_Can…	-	Halobacteria:559|Thermoprotei:24|Unclassified_Euryarchaeota:15|Candidatus_Poseidoniia:12|Unclassified_Thermoproteota:10|Unclassified_Archaea:9|Unclassified_Candidatus_Lokiarchaeota:6|Unclassified_Candidatus_Thorarchaeota:3|Unclassified_Candidatus_Heimdallarchaeota:3|Candidatus_Methanomethylicia:3|Unclassified_Candidatus_Geoarchaeota:2|Thermoplasmata:2|Unclassified_Nitrososphaerota:1|Archaeoglobi:…
M00028|Ornithine_biosynthesis_glutamate_=>_ornithine	14	5	1493	752	29	76	628	K00618,K00619,K14681,K14682,K00620,K22477,K22478:390.30,164.57,965.53,230.97,174.70,79.60,518.53|K00930,K22478,K12659:221.20,518.53,668.57|K00145,K12659:124.50,668.57|K00818,K00821:577.33,499.57|K01438,K14677,K00620:291.07,199.60,174.70	Thermoprotei:273|Unclassified_Nitrososphaerota:247|Unclassified_Archaea:168|Unclassified_Euryarchaeota:111|Halobacteria:99|Thermococci:86|Unclassified_Thermoproteota:76|Thermoplasmata:58|Nitrososphaeria:55|Unclassified_Candidatus_Micrarchaeota:42|Unclassified_Candidatus_Woesearchaeota:39|Unclassified_Candidatus_Aenigmatarchaeota:38|Unclassified_Candidatus_Bathyarchaeota:31|Unclassified_Candidatus…	Halobacteria:559|Thermoprotei:38|Unclassified_Candidatus_Bathyarchaeota:21|Unclassified_Archaea:19|Unclassified_Euryarchaeota:19|Unclassified_Nitrososphaerota:17|Unclassified_Thermoproteota:13|Methanomicrobia:10|Thermoplasmata:8|Methanobacteria:6|Unclassified_Candidatus_Altiarchaeota:5|Archaeoglobi:5|Unclassified_Candidatus_Thorarchaeota:4|Unclassified_Candidatus_Lokiarchaeota:4|Unclassified_Cand…	Methanobacteria:9|Methanomicrobia:8|Unclassified_Candidatus_Altiarchaeota:3|Unclassified_Euryarchaeota:3|Methanococci:1|Unclassified_Archaea:1|Candidatus_Methanofastidiosa:1|Thermoplasmata:1|Archaeoglobi:1|Unclassified_Candidatus_Hydrothermarchaeota:1	Methanomicrobia:29|Methanobacteria:25|Archaeoglobi:7|Unclassified_Candidatus_Altiarchaeota:3|Thermoplasmata:3|Unclassified_Euryarchaeota:3|Unclassified_Candidatus_Micrarchaeota:2|Unclassified_Archaea:2|Methanonatronarchaeia:1|Candidatus_Methanoliparia:1	Methanomicrobia:267|Methanobacteria:216|Methanococci:44|Archaeoglobi:22|Unclassified_Euryarchaeota:22|Thermoplasmata:18|Candidatus_Methanofastidiosa:7|Unclassified_Candidatus_Altiarchaeota:6|Hadesarchaea:5|Candidatus_Methanoliparia:4|Unclassified_Candidatus_Woesearchaeota:3|Unclassified_Archaea:3|Methanopyri:3|Unclassified_Candidatus_Lokiarchaeota:2|Methanonatronarchaeia:2|Unclassified_Candidatus…
M00621|Glycine_cleavage_system	5	3	1615	232	461	44	626	K00281,K00282+K00283:639.33,402.20+528.47|K00605:320.33|K00382:457.27	Methanomicrobia:312|Methanobacteria:257|Unclassified_Nitrososphaerota:231|Unclassified_Archaea:146|Unclassified_Euryarchaeota:94|Thermoprotei:92|Unclassified_Thermoproteota:52|Nitrososphaeria:48|Methanococci:45|Unclassified_Candidatus_Woesearchaeota:38|Unclassified_Candidatus_Aenigmatarchaeota:38|Archaeoglobi:37|Thermoplasmata:28|Unclassified_Candidatus_Parvarchaeota:27|Unclassified_Candidatus_Mi…	Halobacteria:37|Unclassified_Euryarchaeota:26|Unclassified_Candidatus_Micrarchaeota:20|Unclassified_Archaea:19|Thermoprotei:17|Unclassified_Nitrososphaerota:17|Thermoplasmata:14|Unclassified_Candidatus_Bathyarchaeota:14|Unclassified_Thermoproteota:13|Methanomicrobia:10|Candidatus_Poseidoniia:8|Candidatus_Nanohaloarchaea:4|Candidatus_Micrarchaeia:4|Unclassified_Candidatus_Woesearchaeota:3|Unclassi…	Thermoprotei:181|Thermococci:84|Halobacteria:46|Unclassified_Euryarchaeota:29|Thermoplasmata:24|Unclassified_Archaea:18|Unclassified_Candidatus_Bathyarchaeota:14|Unclassified_Thermoproteota:11|Unclassified_Nitrososphaerota:8|Candidatus_Poseidoniia:8|Nitrososphaeria:7|Unclassified_Candidatus_Korarchaeota:5|Unclassified_Candidatus_Thorarchaeota:4|Unclassified_Candidatus_Thermoplasmatota:4|Unclassif…	Halobacteria:40|Unclassified_Candidatus_Geoarchaeota:1|Unclassified_Euryarchaeota:1|Unclassified_Candidatus_Lokiarchaeota:1|Unclassified_Archaea:1	Halobacteria:515|Thermoplasmata:22|Thermoprotei:21|Unclassified_Thermoproteota:13|Unclassified_Archaea:9|Unclassified_Euryarchaeota:8|Unclassified_Nitrososphaerota:8|Unclassified_Candidatus_Marsarchaeota:8|Unclassified_Candidatus_Lokiarchaeota:5|Unclassified_Candidatus_Verstraetearchaeota:4|Unclassified_Candidatus_Heimdallarchaeota:3|Candidatus_Poseidoniia:3|Unclassified_Candidatus_Geoarchaeota:3…
M00846|Siroheme_biosynthesis_glutamyl-tRNA_=>_siroheme	17	8	743	338	306	1062	529	K02492:72.33|K01845:313.37|K01698:79.50|K01749:125.47|K01719,K13542,K13543:43.90,402.40,433.60|K02302,K00589,K02303,K02496,K13542,K13543:429.43,494.00,253.10,58.27,402.40,433.60|K02302,K02304,K24866:429.43,173.87,159.07|K02302,K02304,K03794,K03795,K01772,K02190:429.43,173.87,138.33,121.23,89.67,139.47	Unclassified_Archaea:135|Unclassified_Euryarchaeota:95|Thermococci:86|Unclassified_Nitrososphaerota:45|Unclassified_Candidatus_Aenigmatarchaeota:41|Unclassified_Candidatus_Woesearchaeota:39|Unclassified_Candidatus_Micrarchaeota:38|Thermoplasmata:36|Thermoprotei:34|Unclassified_Thermoproteota:30|Unclassified_Candidatus_Bathyarchaeota:24|Candidatus_Poseidoniia:23|Unclassified_Candidatus_Parvarchaeo…	Unclassified_Nitrososphaerota:68|Unclassified_Thermoproteota:36|Unclassified_Archaea:32|Thermoprotei:32|Unclassified_Euryarchaeota:28|Unclassified_Candidatus_Bathyarchaeota:23|Methanomicrobia:18|Halobacteria:18|Unclassified_Candidatus_Micrarchaeota:11|Nitrososphaeria:9|Thermoplasmata:9|Unclassified_Candidatus_Parvarchaeota:8|Unclassified_Candidatus_Altiarchaeota:6|Unclassified_Candidatus_Lokiarch…	Halobacteria:59|Unclassified_Nitrososphaerota:42|Thermoprotei:36|Methanobacteria:32|Methanomicrobia:31|Unclassified_Euryarchaeota:18|Thermoplasmata:18|Unclassified_Archaea:15|Unclassified_Thermoproteota:12|Nitrososphaeria:9|Candidatus_Methanofastidiosa:7|Archaeoglobi:5|Unclassified_Candidatus_Marsarchaeota:5|Methanococci:3|Unclassified_Candidatus_Geoarchaeota:3|Unclassified_Candidatus_Geothermarc…	Methanomicrobia:239|Methanobacteria:223|Thermoprotei:209|Unclassified_Nitrososphaerota:109|Halobacteria:82|Methanococci:42|Nitrososphaeria:38|Archaeoglobi:26|Thermoplasmata:25|Unclassified_Euryarchaeota:16|Unclassified_Thermoproteota:11|Unclassified_Archaea:10|Unclassified_Candidatus_Verstraetearchaeota:5|Candidatus_Methanomethylicia:4|Unclassified_Candidatus_Bathyarchaeota:3|Methanonatronarchaei…	Halobacteria:495|Methanomicrobia:31|Unclassified_Euryarchaeota:1|Nitrososphaeria:1|Unclassified_Archaea:1
M00741|Propanoyl-CoA_metabolism_propanoyl-CoA_=>_succinyl-CoA	13	3	1484	332	447	190	525	K01965+K01966,K11263+K18472,K11263+K19312+K22568,K01964+K15036+K15037:853.50+915.80,797.07+607.23,797.07+922.17+60.40,976.17+1071.07+123.63|K05606:74.00|K01847,K01848+K01849:754.27,798.50+169.47	Methanomicrobia:319|Methanobacteria:257|Unclassified_Archaea:154|Unclassified_Euryarchaeota:105|Unclassified_Nitrososphaerota:101|Thermoprotei:63|Unclassified_Candidatus_Micrarchaeota:47|Methanococci:45|Thermoplasmata:45|Unclassified_Candidatus_Woesearchaeota:43|Unclassified_Thermoproteota:43|Unclassified_Candidatus_Aenigmatarchaeota:41|Unclassified_Candidatus_Bathyarchaeota:34|Unclassified_Candi…	Thermoprotei:83|Unclassified_Nitrososphaerota:50|Thermoplasmata:35|Unclassified_Thermoproteota:25|Halobacteria:25|Unclassified_Archaea:24|Unclassified_Euryarchaeota:22|Unclassified_Candidatus_Marsarchaeota:10|Unclassified_Candidatus_Bathyarchaeota:9|Unclassified_Candidatus_Lokiarchaeota:7|Archaeoglobi:7|Nitrososphaeria:6|Candidatus_Poseidoniia:6|Candidatus_Methanoliparia:4|Methanomicrobia:4|Uncla…	Unclassified_Nitrososphaerota:113|Thermococci:83|Halobacteria:54|Nitrososphaeria:42|Thermoprotei:29|Unclassified_Euryarchaeota:27|Archaeoglobi:22|Unclassified_Thermoproteota:20|Candidatus_Poseidoniia:13|Unclassified_Archaea:10|Candidatus_Methanofastidiosa:8|Unclassified_Candidatus_Bathyarchaeota:6|Unclassified_Candidatus_Thorarchaeota:5|Thermoplasmata:5|Unclassified_Candidatus_Thermoplasmatota:3|…	Halobacteria:157|Thermoprotei:18|Unclassified_Euryarchaeota:4|Thermoplasmata:3|Unclassified_Archaea:3|Unclassified_Candidatus_Bathyarchaeota:3|Unclassified_Candidatus_Thermoplasmatota:1|Unclassified_Candidatus_Micrarchaeota:1	Halobacteria:404|Thermoprotei:118|Unclassified_Archaea:2|Unclassified_Thermoproteota:1
M00003|Gluconeogenesis_oxaloacetate_=>_fructose-6P	20	8	151	426	565	1326	510	K01596,K01610:230.00,86.17|K01689:70.27|K01834,K15633,K15634,K15635:147.67,78.67,200.73,119.13|K00927:204.47|K00134,K00150:425.43,334.77|K01803:29.33|K01623,K01624,K11645,K01622:34.20,96.33,281.50,127.77|K03841,K02446,K11532,K01086,K04041,K01622:213.93,473.30,482.13,582.87,542.77,127.77	Unclassified_Euryarchaeota:33|Unclassified_Archaea:30|Unclassified_Candidatus_Micrarchaeota:24|Unclassified_Nitrososphaerota:14|Unclassified_Candidatus_Aenigmatarchaeota:9|Unclassified_Thermoproteota:9|Unclassified_Candidatus_Woesearchaeota:6|Candidatus_Micrarchaeia:4|Unclassified_Candidatus_Parvarchaeota:4|Thermoplasmata:3|Unclassified_Nanoarchaeota:3|Unclassified_Candidatus_Bathyarchaeota:2|Can…	Unclassified_Archaea:85|Unclassified_Nitrososphaerota:84|Unclassified_Euryarchaeota:56|Unclassified_Thermoproteota:30|Thermoplasmata:17|Thermoprotei:17|Methanomicrobia:16|Unclassified_Candidatus_Aenigmatarchaeota:14|Nitrososphaeria:12|Unclassified_Candidatus_Woesearchaeota:12|Halobacteria:11|Unclassified_Candidatus_Parvarchaeota:10|Archaeoglobi:8|Unclassified_Candidatus_Diapherotrites:7|Unclassif…	Methanomicrobia:142|Unclassified_Nitrososphaerota:70|Halobacteria:48|Unclassified_Archaea:43|Thermoprotei:33|Unclassified_Euryarchaeota:29|Methanobacteria:28|Unclassified_Thermoproteota:25|Unclassified_Candidatus_Woesearchaeota:15|Unclassified_Candidatus_Micrarchaeota:15|Unclassified_Candidatus_Bathyarchaeota:14|Unclassified_Candidatus_Parvarchaeota:13|Candidatus_Poseidoniia:13|Unclassified_Candi…	Halobacteria:402|Methanobacteria:228|Methanomicrobia:159|Thermoprotei:111|Unclassified_Nitrososphaerota:93|Methanococci:45|Thermoplasmata:43|Unclassified_Euryarchaeota:37|Unclassified_Archaea:30|Archaeoglobi:28|Nitrososphaeria:25|Unclassified_Candidatus_Bathyarchaeota:19|Unclassified_Thermoproteota:18|Unclassified_Candidatus_Woesearchaeota:10|Unclassified_Candidatus_Lokiarchaeota:6|Unclassified_C…	Halobacteria:196|Thermoprotei:149|Thermococci:81|Thermoplasmata:14|Unclassified_Candidatus_Bathyarchaeota:10|Nitrososphaeria:8|Unclassified_Thermoproteota:7|Hadesarchaea:5|Unclassified_Archaea:5|Methanomicrobia:5|Unclassified_Candidatus_Thermoplasmatota:4|Unclassified_Candidatus_Altiarchaeota:4|Unclassified_Candidatus_Korarchaeota:4|Unclassified_Euryarchaeota:3|Candidatus_Methanoliparia:3|Unclass…
M00048|De_novo_purine_biosynthesis_PRPP_+_glutamine_=>_IMP	24	11	388	474	326	1291	499	K00764:184.20|K01945,K11787,K11788,K13713:118.10,1105.03,1158.03,913.07|K00601,K11175,K08289,K11787,K01492:247.93,194.90,263.30,1105.03,905.60|K01952,K23269+K23264+K23265,K23270+K23265:632.50,715.20+40.47+217.03,861.73+217.03|K01933,K11787,K11788:192.23,1105.03,1158.03|K01933,K11787,K01587,K11808,K01589:192.23,1105.03,323.20,651.30,270.67|K01933,K11787,K01587,K11808,K01588:192.23,1105.03,323.20,6…	Unclassified_Archaea:81|Thermoprotei:61|Unclassified_Nitrososphaerota:38|Unclassified_Candidatus_Micrarchaeota:35|Unclassified_Euryarchaeota:32|Unclassified_Candidatus_Aenigmatarchaeota:22|Unclassified_Candidatus_Parvarchaeota:21|Unclassified_Candidatus_Woesearchaeota:17|Unclassified_Nanoarchaeota:16|Unclassified_Thermoproteota:15|Nanohaloarchaea:7|Candidatus_Nanohaloarchaea:5|Nitrososphaeria:5|C…	Unclassified_Nitrososphaerota:95|Unclassified_Archaea:65|Unclassified_Euryarchaeota:56|Thermoprotei:44|Unclassified_Thermoproteota:38|Unclassified_Candidatus_Woesearchaeota:20|Unclassified_Candidatus_Aenigmatarchaeota:18|Unclassified_Candidatus_Bathyarchaeota:18|Methanomicrobia:13|Thermoplasmata:13|Halobacteria:13|Unclassified_Candidatus_Marsarchaeota:9|Archaeoglobi:9|Thermococci:7|Hadesarchaea:6…	Unclassified_Nitrososphaerota:49|Halobacteria:45|Thermoprotei:36|Methanomicrobia:29|Unclassified_Euryarchaeota:28|Methanobacteria:25|Unclassified_Candidatus_Bathyarchaeota:19|Nitrososphaeria:16|Unclassified_Archaea:14|Thermoplasmata:12|Unclassified_Thermoproteota:11|Archaeoglobi:8|Unclassified_Candidatus_Altiarchaeota:7|Candidatus_Poseidoniia:4|Unclassified_Candidatus_Woesearchaeota:3|Unclassifie…	Halobacteria:472|Methanobacteria:230|Thermoprotei:170|Unclassified_Nitrososphaerota:82|Methanomicrobia:63|Thermoplasmata:38|Nitrososphaeria:31|Thermococci:29|Unclassified_Euryarchaeota:29|Unclassified_Archaea:28|Archaeoglobi:21|Unclassified_Thermoproteota:19|Candidatus_Poseidoniia:11|Unclassified_Candidatus_Bathyarchaeota:10|Candidatus_Methanofastidiosa:8|Unclassified_Candidatus_Altiarchaeota:6|C…	Methanomicrobia:217|Halobacteria:126|Thermococci:50|Methanococci:44|Thermoplasmata:24|Unclassified_Euryarchaeota:13|Unclassified_Thermoproteota:6|Unclassified_Archaea:5|Unclassified_Candidatus_Thermoplasmatota:3|Unclassified_Candidatus_Micrarchaeota:3|Unclassified_Candidatus_Altiarchaeota:3|Candidatus_Poseidoniia:3|Unclassified_Candidatus_Bathyarchaeota:1|Unclassified_Candidatus_Lokiarchaeota:1
M00015|Proline_biosynthesis_glutamate_=>_proline	4	3	1986	449	65	0	478	K00931,K12657:286.67,617.93|K00147,K12657:552.37,617.93|K00286:133.23	Halobacteria:376|Unclassified_Nitrososphaerota:240|Methanobacteria:219|Unclassified_Archaea:175|Thermoprotei:134|Unclassified_Euryarchaeota:116|Methanomicrobia:91|Unclassified_Thermoproteota:75|Nitrososphaeria:57|Thermoplasmata:50|Thermococci:47|Unclassified_Candidatus_Micrarchaeota:45|Methanococci:45|Unclassified_Candidatus_Aenigmatarchaeota:41|Unclassified_Candidatus_Woesearchaeota:40|Archaeogl…	Thermoprotei:177|Methanomicrobia:56|Thermococci:39|Methanobacteria:38|Unclassified_Euryarchaeota:20|Unclassified_Nitrososphaerota:19|Unclassified_Candidatus_Bathyarchaeota:15|Thermoplasmata:15|Unclassified_Thermoproteota:12|Unclassified_Archaea:12|Archaeoglobi:12|Halobacteria:7|Candidatus_Poseidoniia:6|Unclassified_Candidatus_Lokiarchaeota:4|Unclassified_Candidatus_Woesearchaeota:3|Unclassified_C…	Halobacteria:18|Methanomicrobia:16|Unclassified_Euryarchaeota:8|Unclassified_Nitrososphaerota:5|Thermoplasmata:4|Unclassified_Candidatus_Micrarchaeota:4|Unclassified_Archaea:3|Unclassified_Candidatus_Bathyarchaeota:2|Unclassified_Candidatus_Lokiarchaeota:1|Unclassified_Thermoproteota:1|Unclassified_Candidatus_Verstraetearchaeota:1|Unclassified_Candidatus_Diapherotrites:1|Hadesarchaea:1	-	Halobacteria:257|Methanomicrobia:160|Thermoplasmata:19|Unclassified_Euryarchaeota:14|Unclassified_Candidatus_Bathyarchaeota:9|Candidatus_Methanomethylicia:4|Unclassified_Candidatus_Verstraetearchaeota:3|Candidatus_Methanofastidiosa:3|Unclassified_Archaea:3|Hadesarchaea:3|Candidatus_Hadarchaeia:2|Unclassified_Thermoproteota:1
M00053|Deoxyribonucleotide_biosynthesis_ADP/GDP/CDP/UDP_=>_dATP/dGTP/dCTP/dUTP	6	2	431	265	624	1186	472	K00525+K00526,K10807+K10808:363.03+46.53,1517.07+645.77|K00940,K18533:143.63,278.87	Unclassified_Nitrososphaerota:73|Unclassified_Euryarchaeota:69|Unclassified_Archaea:49|Thermoprotei:41|Unclassified_Thermoproteota:36|Methanomicrobia:19|Unclassified_Candidatus_Bathyarchaeota:19|Methanobacteria:16|Halobacteria:16|Unclassified_Candidatus_Micrarchaeota:11|Unclassified_Candidatus_Parvarchaeota:11|Thermoplasmata:10|Unclassified_Candidatus_Woesearchaeota:8|Unclassified_Candidatus_Aeni…	Unclassified_Archaea:43|Unclassified_Nitrososphaerota:27|Unclassified_Candidatus_Bathyarchaeota:24|Thermoprotei:20|Unclassified_Thermoproteota:19|Unclassified_Euryarchaeota:18|Halobacteria:16|Unclassified_Candidatus_Parvarchaeota:14|Methanomicrobia:12|Unclassified_Candidatus_Aenigmatarchaeota:10|Unclassified_Candidatus_Micrarchaeota:8|Nitrososphaeria:8|Unclassified_Candidatus_Woesearchaeota:7|Unc…	Methanobacteria:212|Methanomicrobia:58|Unclassified_Archaea:46|Methanococci:45|Halobacteria:41|Unclassified_Nitrososphaerota:40|Unclassified_Euryarchaeota:32|Thermoprotei:27|Thermoplasmata:19|Unclassified_Candidatus_Altiarchaeota:12|Unclassified_Candidatus_Woesearchaeota:9|Nitrososphaeria:9|Unclassified_Candidatus_Aenigmatarchaeota:8|Unclassified_Candidatus_Verstraetearchaeota:7|Unclassified_Ther…	Methanomicrobia:234|Halobacteria:233|Unclassified_Nitrososphaerota:124|Thermoprotei:123|Thermococci:83|Thermoplasmata:53|Unclassified_Archaea:52|Nitrososphaeria:35|Unclassified_Euryarchaeota:32|Archaeoglobi:28|Methanobacteria:28|Unclassified_Thermoproteota:26|Unclassified_Candidatus_Micrarchaeota:24|Unclassified_Candidatus_Woesearchaeota:19|Unclassified_Candidatus_Aenigmatarchaeota:16|Candidatus_…	Halobacteria:352|Thermoprotei:100|Unclassified_Euryarchaeota:7|Unclassified_Archaea:3|Unclassified_Candidatus_Geoarchaeota:2|Thermoplasmata:2|Nanohaloarchaea:2|Candidatus_Nanohaloarchaea:1|Unclassified_Candidatus_Micrarchaeota:1|Candidatus_Poseidoniia:1|Unclassified_Thermoproteota:1
M00567|Methanogenesis_CO2_=>_methane	34	8	845	1431	158	168	376	K00200+K00201+K00202+K00203+K00205,K00200+K00201+K00202+K00203+K11260,K00200+K00201+K00202+K00203+K00204:423.47+175.73+193.20+122.17+204.53,423.47+175.73+193.20+122.17+76.63,423.47+175.73+193.20+122.17+171.57|K00672:197.80|K01499:288.83|K00319,K13942:339.40,575.00|K00320:219.43|K00577+K00578+K00579+K00580+K00581+K00584:133.07+79.93+202.23+258.10+372.47+288.83|K00399+K00401+K00402:784.63+509.60+35…	Unclassified_Nitrososphaerota:144|Unclassified_Archaea:128|Thermoprotei:105|Thermococci:62|Unclassified_Euryarchaeota:60|Unclassified_Thermoproteota:54|Unclassified_Candidatus_Micrarchaeota:49|Unclassified_Candidatus_Aenigmatarchaeota:41|Unclassified_Candidatus_Woesearchaeota:39|Unclassified_Candidatus_Parvarchaeota:27|Nitrososphaeria:24|Thermoplasmata:24|Unclassified_Nanoarchaeota:17|Unclassifie…	Halobacteria:650|Thermoprotei:205|Unclassified_Nitrososphaerota:118|Unclassified_Euryarchaeota:91|Thermoplasmata:64|Unclassified_Archaea:47|Nitrososphaeria:33|Methanomicrobia:30|Unclassified_Candidatus_Bathyarchaeota:30|Unclassified_Thermoproteota:27|Thermococci:24|Unclassified_Candidatus_Altiarchaeota:17|Candidatus_Poseidoniia:15|Archaeoglobi:12|Methanobacteria:9|Candidatus_Methanofastidiosa:8|U…	Methanobacteria:47|Methanomicrobia:27|Archaeoglobi:24|Unclassified_Candidatus_Bathyarchaeota:18|Unclassified_Archaea:16|Unclassified_Candidatus_Lokiarchaeota:4|Unclassified_Euryarchaeota:4|Unclassified_Candidatus_Thorarchaeota:2|Unclassified_Nitrososphaerota:2|Unclassified_Candidatus_Geothermarchaeota:2|Unclassified_Thermoproteota:2|Methanonatronarchaeia:2|Theionarchaea:2|Unclassified_Candidatus_…	Methanobacteria:90|Methanomicrobia:50|Unclassified_Thermoproteota:6|Candidatus_Methanoliparia:5|Unclassified_Candidatus_Thorarchaeota:3|Archaeoglobi:2|Methanococci:2|Candidatus_Hadarchaeia:2|Unclassified_Candidatus_Nezhaarchaeota:2|Unclassified_Candidatus_Bathyarchaeota:2|Candidatus_Hydrothermarchaeia:1|Methanonatronarchaeia:1|Unclassified_Euryarchaeota:1|Unclassified_Archaea:1	Methanomicrobia:216|Methanobacteria:111|Methanococci:43|Methanopyri:3|Unclassified_Euryarchaeota:2|Unclassified_Archaea:1
M00021|Cysteine_biosynthesis_serine_=>_cysteine	5	2	2039	0	563	0	376	K00640,K23304:93.47,350.03|K01738,K13034,K17069:432.17,607.50,810.93	Thermoprotei:311|Unclassified_Nitrososphaerota:261|Halobacteria:203|Unclassified_Archaea:184|Methanomicrobia:155|Unclassified_Euryarchaeota:136|Unclassified_Thermoproteota:87|Thermococci:86|Thermoplasmata:64|Nitrososphaeria:57|Unclassified_Candidatus_Micrarchaeota:48|Unclassified_Candidatus_Bathyarchaeota:44|Methanococci:44|Unclassified_Candidatus_Woesearchaeota:42|Archaeoglobi:38|Unclassified_Ca…	-	Halobacteria:423|Methanomicrobia:85|Methanobacteria:13|Thermoplasmata:11|Unclassified_Archaea:8|Unclassified_Euryarchaeota:6|Unclassified_Candidatus_Aenigmatarchaeota:5|Unclassified_Nitrososphaerota:3|Theionarchaea:2|Unclassified_Candidatus_Diapherotrites:2|Unclassified_Candidatus_Woesearchaeota:1|Unclassified_Candidatus_Bathyarchaeota:1|Unclassified_Candidatus_Micrarchaeota:1|Unclassified_Thermo…	-	Methanobacteria:214|Methanomicrobia:83|Halobacteria:32|Unclassified_Euryarchaeota:16|Thermoplasmata:13|Unclassified_Candidatus_Bathyarchaeota:7|Unclassified_Candidatus_Lokiarchaeota:4|Methanonatronarchaeia:3|Unclassified_Archaea:1|Unclassified_Candidatus_Odinarchaeota:1|Unclassified_Thermoproteota:1|Methanococci:1
M00422|Acetyl-CoA_pathway_CO2_=>_acetyl-CoA	5	2	2430	79	54	54	361	K00192+K00195:697.87+97.87|K00193+K00197+K00194:619.67+334.03+275.80	Halobacteria:658|Thermoprotei:307|Unclassified_Nitrososphaerota:258|Methanobacteria:202|Unclassified_Archaea:168|Unclassified_Euryarchaeota:124|Thermococci:86|Methanomicrobia:75|Thermoplasmata:75|Unclassified_Thermoproteota:73|Nitrososphaeria:57|Unclassified_Candidatus_Micrarchaeota:49|Unclassified_Candidatus_Woesearchaeota:43|Unclassified_Candidatus_Aenigmatarchaeota:41|Unclassified_Candidatus_P…	Methanomicrobia:27|Unclassified_Euryarchaeota:19|Thermoplasmata:13|Unclassified_Candidatus_Lokiarchaeota:3|Unclassified_Candidatus_Altiarchaeota:3|Unclassified_Candidatus_Bathyarchaeota:3|Unclassified_Archaea:3|Methanobacteria:2|Unclassified_Candidatus_Hydrothermarchaeota:2|Unclassified_Thermoproteota:2|Unclassified_Nitrososphaerota:1|Hadesarchaea:1	Methanomicrobia:13|Unclassified_Candidatus_Altiarchaeota:9|Unclassified_Euryarchaeota:9|Unclassified_Thermoproteota:6|Unclassified_Candidatus_Bathyarchaeota:4|Thermoprotei:3|Unclassified_Archaea:2|Unclassified_Candidatus_Lokiarchaeota:2|Unclassified_Nitrososphaerota:2|Unclassified_Candidatus_Thorarchaeota:1|Methanobacteria:1|Candidatus_Methanoliparia:1|Unclassified_Candidatus_Hydrothermarchaeota:1	Methanomicrobia:28|Unclassified_Archaea:8|Unclassified_Candidatus_Bathyarchaeota:6|Archaeoglobi:3|Unclassified_Thermoproteota:1|Candidatus_Methanoliparia:1|Unclassified_Euryarchaeota:1|Theionarchaea:1|Methanobacteria:1|Unclassified_Candidatus_Lokiarchaeota:1|Thermoprotei:1|Unclassified_Candidatus_Altiarchaeota:1|Unclassified_Nitrososphaerota:1	Methanomicrobia:180|Methanobacteria:51|Methanococci:39|Archaeoglobi:27|Unclassified_Candidatus_Bathyarchaeota:19|Unclassified_Archaea:12|Unclassified_Thermoproteota:7|Unclassified_Euryarchaeota:5|Candidatus_Methanoliparia:3|Methanopyri:3|Unclassified_Nitrososphaerota:2|Unclassified_Candidatus_Geothermarchaeota:2|Hadesarchaea:2|Candidatus_Hadarchaeia:2|Unclassified_Candidatus_Thorarchaeota:2|Uncla…
M00308|Semi-phosphorylative_Entner-Doudoroff_pathway_gluconate_=>_glycerate-3P	7	5	568	1689	195	179	347	K05308:423.10|K00874:237.90|K01625:191.60|K00134,K00131,K18978:425.43,480.63,555.07|K00927,K00131,K18978:204.47,480.63,555.07	Unclassified_Archaea:109|Unclassified_Nitrososphaerota:93|Unclassified_Euryarchaeota:84|Unclassified_Thermoproteota:35|Unclassified_Candidatus_Micrarchaeota:29|Thermoprotei:21|Unclassified_Candidatus_Aenigmatarchaeota:19|Thermoplasmata:19|Methanomicrobia:18|Nitrososphaeria:14|Unclassified_Candidatus_Woesearchaeota:13|Unclassified_Nanoarchaeota:13|Halobacteria:11|Archaeoglobi:11|Methanobacteria:10…	Methanomicrobia:305|Methanobacteria:247|Thermoprotei:165|Unclassified_Nitrososphaerota:165|Halobacteria:82|Thermococci:81|Unclassified_Archaea:79|Unclassified_Euryarchaeota:73|Thermoplasmata:69|Unclassified_Thermoproteota:50|Methanococci:44|Nitrososphaeria:43|Unclassified_Candidatus_Bathyarchaeota:39|Unclassified_Candidatus_Woesearchaeota:30|Archaeoglobi:27|Unclassified_Candidatus_Aenigmatarchaeo…	Thermoprotei:123|Halobacteria:51|Unclassified_Nitrososphaerota:5|Thermococci:4|Unclassified_Thermoproteota:4|Unclassified_Candidatus_Bathyarchaeota:3|Unclassified_Archaea:2|Unclassified_Euryarchaeota:1|Unclassified_Candidatus_Lokiarchaeota:1|Hadesarchaea:1	Halobacteria:167|Unclassified_Candidatus_Thorarchaeota:4|Unclassified_Archaea:3|Thermoprotei:2|Unclassified_Candidatus_Lokiarchaeota:2|Unclassified_Nitrososphaerota:1	Halobacteria:347
M00001|Glycolysis_(Embden-Meyerhof_pathway)_glucose_=>_pyruvate	31	10	132	631	1186	689	340	K00844,K12407,K00845,K25026,K00886,K08074,K00918:103.40,758.20,116.37,270.83,146.57,264.70,231.30|K01810,K06859,K13810,K15916:180.10,111.23,642.23,164.00|K00850,K16370,K21071,K00918:351.60,317.20,354.00,231.30|K01623,K01624,K11645,K16305,K16306:34.20,96.33,281.50,409.73,331.27|K01803:29.33|K00134,K00150,K11389:425.43,334.77,626.87|K00927,K11389:204.47,626.87|K01834,K15633,K15634,K15635:147.67,78.…	Unclassified_Euryarchaeota:33|Unclassified_Archaea:24|Unclassified_Candidatus_Micrarchaeota:20|Unclassified_Nitrososphaerota:11|Unclassified_Candidatus_Aenigmatarchaeota:7|Unclassified_Thermoproteota:7|Unclassified_Candidatus_Woesearchaeota:6|Candidatus_Micrarchaeia:4|Unclassified_Candidatus_Parvarchaeota:4|Unclassified_Nanoarchaeota:3|Candidatus_Poseidoniia:3|Thermoplasmata:2|Unclassified_Candid…	Unclassified_Nitrososphaerota:145|Unclassified_Archaea:102|Unclassified_Euryarchaeota:75|Unclassified_Thermoproteota:43|Thermoprotei:28|Thermoplasmata:25|Unclassified_Candidatus_Aenigmatarchaeota:23|Nitrososphaeria:22|Methanomicrobia:17|Unclassified_Candidatus_Woesearchaeota:16|Unclassified_Candidatus_Bathyarchaeota:15|Unclassified_Candidatus_Micrarchaeota:13|Unclassified_Nanoarchaeota:13|Halobac…	Methanobacteria:253|Thermoprotei:231|Halobacteria:142|Unclassified_Nitrososphaerota:103|Methanomicrobia:80|Unclassified_Archaea:56|Unclassified_Euryarchaeota:43|Thermoplasmata:35|Nitrososphaeria:34|Unclassified_Thermoproteota:27|Archaeoglobi:22|Unclassified_Candidatus_Bathyarchaeota:20|Unclassified_Candidatus_Woesearchaeota:18|Candidatus_Poseidoniia:14|Unclassified_Candidatus_Parvarchaeota:13|Unc…	Halobacteria:460|Methanomicrobia:69|Thermoprotei:39|Thermoplasmata:24|Unclassified_Candidatus_Bathyarchaeota:15|Unclassified_Thermoproteota:12|Methanococci:11|Unclassified_Archaea:9|Archaeoglobi:4|Unclassified_Candidatus_Lokiarchaeota:4|Unclassified_Candidatus_Micrarchaeota:4|Unclassified_Nitrososphaerota:4|Unclassified_Candidatus_Marsarchaeota:4|Thermococci:4|Unclassified_Euryarchaeota:4|Unclass…	Methanomicrobia:157|Thermococci:81|Halobacteria:44|Methanococci:34|Thermoprotei:12|Unclassified_Euryarchaeota:3|Unclassified_Archaea:2|Thermoplasmata:2|Archaeoglobi:1|Unclassified_Candidatus_Woesearchaeota:1|Unclassified_Nitrososphaerota:1|Unclassified_Candidatus_Micrarchaeota:1|Unclassified_Candidatus_Bathyarchaeota:1
M00793|dTDP-L-rhamnose_biosynthesis	5	4	1591	489	420	149	329	K00973:240.80|K01710:474.13|K01790,K23987:204.90,466.13|K00067,K23987:301.37,466.13	Halobacteria:326|Unclassified_Nitrososphaerota:189|Unclassified_Archaea:150|Unclassified_Euryarchaeota:127|Methanomicrobia:118|Thermoprotei:105|Unclassified_Thermoproteota:68|Thermoplasmata:52|Nitrososphaeria:42|Unclassified_Candidatus_Bathyarchaeota:42|Thermococci:40|Unclassified_Candidatus_Micrarchaeota:36|Unclassified_Candidatus_Aenigmatarchaeota:34|Methanococci:30|Unclassified_Candidatus_Woes…	Halobacteria:252|Unclassified_Nitrososphaerota:45|Thermoprotei:44|Methanomicrobia:25|Unclassified_Euryarchaeota:20|Unclassified_Archaea:16|Unclassified_Thermoproteota:13|Thermoplasmata:13|Nitrososphaeria:8|Unclassified_Candidatus_Micrarchaeota:7|Methanobacteria:6|Unclassified_Candidatus_Marsarchaeota:5|Unclassified_Candidatus_Woesearchaeota:5|Unclassified_Candidatus_Aenigmatarchaeota:5|Archaeoglo…	Thermoprotei:159|Halobacteria:79|Methanomicrobia:43|Unclassified_Nitrososphaerota:24|Unclassified_Archaea:21|Methanobacteria:16|Thermoplasmata:16|Unclassified_Candidatus_Woesearchaeota:10|Archaeoglobi:9|Unclassified_Candidatus_Bathyarchaeota:8|Unclassified_Thermoproteota:8|Unclassified_Euryarchaeota:6|Nitrososphaeria:6|Unclassified_Candidatus_Micrarchaeota:4|Unclassified_Candidatus_Diapherotrites…	Methanobacteria:47|Methanomicrobia:33|Methanococci:14|Unclassified_Candidatus_Altiarchaeota:9|Unclassified_Archaea:6|Unclassified_Nitrososphaerota:6|Thermococci:6|Archaeoglobi:5|Thermoplasmata:5|Thermoprotei:3|Unclassified_Euryarchaeota:3|Unclassified_Candidatus_Parvarchaeota:3|Unclassified_Candidatus_Lokiarchaeota:2|Unclassified_Candidatus_Micrarchaeota:2|Candidatus_Micrarchaeia:1|Candidatus_Met…	Methanobacteria:181|Methanomicrobia:104|Thermococci:39|Unclassified_Euryarchaeota:2|Thermoplasmata:2|Unclassified_Candidatus_Thermoplasmatota:1
M00155|Cytochrome_c_oxidase_prokaryotes	4	1	2330	57	263	0	328	K02275+K02274+K02276,K02275+K15408:208.07+770.30+186.20,208.07+896.07	Methanomicrobia:323|Thermoprotei:311|Methanobacteria:257|Unclassified_Nitrososphaerota:254|Unclassified_Archaea:185|Unclassified_Euryarchaeota:149|Unclassified_Thermoproteota:87|Thermococci:85|Thermoplasmata:82|Nitrososphaeria:56|Unclassified_Candidatus_Bathyarchaeota:52|Halobacteria:50|Unclassified_Candidatus_Micrarchaeota:49|Methanococci:45|Unclassified_Candidatus_Woesearchaeota:43|Unclassified…	Halobacteria:30|Unclassified_Nitrososphaerota:9|Unclassified_Euryarchaeota:7|Unclassified_Archaea:5|Unclassified_Candidatus_Heimdallarchaeota:3|Thermococci:1|Thermoplasmata:1|Unclassified_Thermoproteota:1	Halobacteria:252|Thermoplasmata:4|Unclassified_Archaea:3|Unclassified_Euryarchaeota:2|Nitrososphaeria:1|Unclassified_Thermoproteota:1	-	Halobacteria:326|Unclassified_Nitrososphaerota:1|Thermoplasmata:1
M00045|Histidine_degradation_histidine_=>_N-formiminoglutamate_=>_glutamate	8	5	2371	135	119	40	313	K01745:422.73|K01712:369.33|K01468:208.30|K01479,K00603,K13990,K05603:199.53,400.83,501.57,340.93|K01479,K00603,K13990,K01458:199.53,400.83,501.57,180.23	Halobacteria:338|Methanomicrobia:316|Unclassified_Nitrososphaerota:257|Methanobacteria:257|Thermoprotei:250|Unclassified_Archaea:177|Unclassified_Euryarchaeota:107|Thermococci:85|Unclassified_Thermoproteota:72|Nitrososphaeria:57|Unclassified_Candidatus_Micrarchaeota:46|Methanococci:45|Unclassified_Candidatus_Woesearchaeota:42|Unclassified_Candidatus_Aenigmatarchaeota:40|Unclassified_Candidatus_Ba…	Thermoprotei:39|Halobacteria:19|Unclassified_Euryarchaeota:15|Thermoplasmata:14|Unclassified_Candidatus_Bathyarchaeota:10|Unclassified_Archaea:6|Candidatus_Poseidoniia:6|Unclassified_Nitrososphaerota:4|Unclassified_Candidatus_Micrarchaeota:3|Unclassified_Thermoproteota:3|Unclassified_Candidatus_Marsarchaeota:2|Unclassified_Candidatus_Geoarchaeota:2|Theionarchaea:2|Unclassified_Candidatus_Thorarch…	Halobacteria:29|Unclassified_Euryarchaeota:24|Thermoprotei:17|Candidatus_Poseidoniia:14|Thermoplasmata:8|Unclassified_Candidatus_Marsarchaeota:8|Unclassified_Archaea:7|Unclassified_Thermoproteota:3|Unclassified_Candidatus_Bathyarchaeota:3|Unclassified_Candidatus_Lokiarchaeota:2|Unclassified_Nitrososphaerota:2|Unclassified_Candidatus_Heimdallarchaeota:1|Unclassified_Candidatus_Thorarchaeota:1	Halobacteria:16|Thermoplasmata:7|Unclassified_Euryarchaeota:5|Unclassified_Thermoproteota:4|Thermoprotei:4|Unclassified_Candidatus_Heimdallarchaeota:2|Unclassified_Archaea:1|Unclassified_Candidatus_Thorarchaeota:1	Halobacteria:256|Thermoplasmata:21|Methanomicrobia:7|Unclassified_Euryarchaeota:7|Unclassified_Thermoproteota:7|Unclassified_Candidatus_Thermoplasmatota:4|Unclassified_Candidatus_Thorarchaeota:2|Unclassified_Candidatus_Lokiarchaeota:2|Unclassified_Archaea:2|Unclassified_Candidatus_Heimdallarchaeota:2|Unclassified_Candidatus_Geoarchaeota:1|Unclassified_Nitrososphaerota:1|Thermoprotei:1
M00010|Citrate_cycle_first_carbon_oxidation_oxaloacetate_=>_2-oxoglutarate	6	3	1372	575	780	0	251	K01647,K05942:368.13,340.50|K01681,K01682:1310.87,675.17|K00031,K00030:155.37,430.30	Methanobacteria:257|Unclassified_Archaea:162|Methanomicrobia:145|Unclassified_Nitrososphaerota:115|Unclassified_Euryarchaeota:100|Thermococci:81|Unclassified_Thermoproteota:62|Thermoprotei:50|Methanococci:45|Unclassified_Candidatus_Bathyarchaeota:43|Unclassified_Candidatus_Aenigmatarchaeota:41|Unclassified_Candidatus_Woesearchaeota:38|Thermoplasmata:34|Unclassified_Candidatus_Micrarchaeota:29|Hal…	Unclassified_Nitrososphaerota:144|Thermoprotei:99|Halobacteria:64|Unclassified_Euryarchaeota:36|Nitrososphaeria:36|Methanomicrobia:34|Thermoplasmata:34|Unclassified_Archaea:18|Unclassified_Thermoproteota:17|Candidatus_Poseidoniia:14|Unclassified_Candidatus_Micrarchaeota:8|Unclassified_Candidatus_Bathyarchaeota:8|Candidatus_Methanofastidiosa:7|Unclassified_Candidatus_Verstraetearchaeota:5|Unclassi…	Halobacteria:367|Methanomicrobia:144|Thermoprotei:142|Archaeoglobi:26|Unclassified_Euryarchaeota:21|Thermoplasmata:11|Unclassified_Candidatus_Micrarchaeota:11|Unclassified_Archaea:9|Unclassified_Candidatus_Parvarchaeota:9|Unclassified_Thermoproteota:7|Candidatus_Poseidoniia:7|Unclassified_Nitrososphaerota:5|Thermococci:4|Unclassified_Candidatus_Lokiarchaeota:3|Methanonatronarchaeia:3|Unclassified…	-	Halobacteria:203|Thermoprotei:20|Thermoplasmata:9|Unclassified_Candidatus_Marsarchaeota:7|Unclassified_Archaea:4|Unclassified_Thermoproteota:3|Unclassified_Candidatus_Geoarchaeota:2|Unclassified_Candidatus_Micrarchaeota:1|Unclassified_Candidatus_Geothermarchaeota:1|Unclassified_Euryarchaeota:1
M00018|Threonine_biosynthesis_aspartate_=>_homoserine_=>_threonine	10	5	520	571	584	1053	250	K00928,K12524,K12525,K12526:352.37,750.40,770.90,465.37|K00133:218.23|K00003,K12524,K12525:287.93,750.40,770.90|K00872,K02204,K02203:170.47,137.60,162.80|K01733:256.33	Unclassified_Archaea:118|Unclassified_Euryarchaeota:74|Unclassified_Candidatus_Micrarchaeota:39|Unclassified_Candidatus_Woesearchaeota:36|Unclassified_Thermoproteota:34|Unclassified_Candidatus_Aenigmatarchaeota:30|Unclassified_Candidatus_Parvarchaeota:27|Thermoprotei:26|Thermoplasmata:26|Unclassified_Nitrososphaerota:24|Unclassified_Nanoarchaeota:16|Unclassified_Candidatus_Bathyarchaeota:10|Uncla…	Unclassified_Nitrososphaerota:88|Thermoprotei:72|Unclassified_Euryarchaeota:54|Thermococci:49|Methanobacteria:45|Halobacteria:42|Unclassified_Archaea:35|Thermoplasmata:30|Unclassified_Thermoproteota:28|Methanomicrobia:20|Unclassified_Candidatus_Bathyarchaeota:20|Candidatus_Poseidoniia:18|Unclassified_Candidatus_Aenigmatarchaeota:10|Archaeoglobi:6|Nitrososphaeria:6|Unclassified_Candidatus_Altiarch…	Methanobacteria:212|Thermoprotei:130|Halobacteria:67|Unclassified_Nitrososphaerota:39|Methanomicrobia:35|Unclassified_Archaea:14|Nitrososphaeria:10|Thermoplasmata:10|Unclassified_Euryarchaeota:9|Unclassified_Thermoproteota:9|Unclassified_Candidatus_Bathyarchaeota:7|Thermococci:7|Archaeoglobi:6|Unclassified_Candidatus_Altiarchaeota:4|Unclassified_Candidatus_Micrarchaeota:4|Candidatus_Methanofastid…	Halobacteria:547|Methanomicrobia:243|Thermoprotei:82|Unclassified_Nitrososphaerota:41|Thermococci:27|Archaeoglobi:23|Unclassified_Archaea:14|Unclassified_Thermoproteota:9|Unclassified_Euryarchaeota:8|Unclassified_Candidatus_Altiarchaeota:8|Nitrososphaeria:7|Unclassified_Candidatus_Bathyarchaeota:7|Unclassified_Candidatus_Marsarchaeota:6|Candidatus_Methanofastidiosa:5|Thermoplasmata:5|Candidatus_M…	Unclassified_Nitrososphaerota:72|Methanococci:45|Nitrososphaeria:32|Methanomicrobia:21|Thermoplasmata:17|Unclassified_Euryarchaeota:13|Unclassified_Archaea:12|Unclassified_Thermoproteota:9|Unclassified_Candidatus_Bathyarchaeota:8|Unclassified_Candidatus_Verstraetearchaeota:4|Methanopyri:3|Unclassified_Candidatus_Korarchaeota:3|Candidatus_Methanomethylicia:2|Methanonatronarchaeia:2|Unclassified_Ca…
M00011|Citrate_cycle_second_carbon_oxidation_2-oxoglutarate_=>_oxaloacetate	30	5	372	1251	809	313	233	K01616+K00382,K00164+K00658+K00382,K00174+K00175:1321.43+457.27,1210.03+450.77+457.27,258.93+235.40|K01902+K01903,K01899+K01900,K18118:361.23+499.70,574.47+593.50,689.17|K00234+K00235+K00236+K00237,K00234+K00235+K00236+K25801,K00239+K00240+K00241,K00244+K00245+K00246:1147.23+472.50+138.30+94.90,1147.23+472.50+138.30+82.07,651.07+140.63+56.13,688.90+294.07+55.07|K01676,K01679,K01677+K01678:353.47,…	Unclassified_Archaea:99|Unclassified_Euryarchaeota:52|Unclassified_Nitrososphaerota:44|Unclassified_Candidatus_Woesearchaeota:24|Unclassified_Thermoproteota:23|Unclassified_Candidatus_Aenigmatarchaeota:20|Unclassified_Candidatus_Micrarchaeota:15|Methanomicrobia:13|Unclassified_Candidatus_Diapherotrites:12|Unclassified_Candidatus_Altiarchaeota:11|Unclassified_Candidatus_Parvarchaeota:10|Unclassifi…	Thermoprotei:221|Unclassified_Nitrososphaerota:207|Methanomicrobia:119|Thermococci:84|Unclassified_Archaea:71|Unclassified_Euryarchaeota:70|Halobacteria:64|Thermoplasmata:59|Nitrososphaeria:52|Unclassified_Thermoproteota:49|Methanobacteria:45|Unclassified_Candidatus_Bathyarchaeota:38|Unclassified_Candidatus_Aenigmatarchaeota:21|Unclassified_Candidatus_Woesearchaeota:19|Unclassified_Candidatus_Mic…	Methanobacteria:212|Methanomicrobia:191|Thermoprotei:83|Halobacteria:77|Methanococci:45|Unclassified_Euryarchaeota:26|Unclassified_Archaea:21|Archaeoglobi:21|Thermoplasmata:21|Unclassified_Candidatus_Micrarchaeota:16|Unclassified_Nitrososphaerota:13|Unclassified_Thermoproteota:12|Unclassified_Candidatus_Parvarchaeota:10|Candidatus_Poseidoniia:10|Unclassified_Candidatus_Marsarchaeota:8|Unclassifie…	Halobacteria:283|Unclassified_Euryarchaeota:10|Candidatus_Poseidoniia:8|Unclassified_Thermoproteota:5|Unclassified_Archaea:2|Unclassified_Candidatus_Geoarchaeota:1|Thermoplasmata:1|Unclassified_Candidatus_Heimdallarchaeota:1|Unclassified_Candidatus_Micrarchaeota:1|Archaeoglobi:1	Halobacteria:233
M00358|Coenzyme_M_biosynthesis	5	4	2173	458	78	47	222	K08097:101.27|K05979:57.20|K05884:362.57|K13039+K06034:218.50+178.87	Halobacteria:440|Thermoprotei:300|Unclassified_Nitrososphaerota:249|Methanomicrobia:246|Unclassified_Archaea:175|Unclassified_Euryarchaeota:140|Unclassified_Thermoproteota:71|Thermococci:70|Thermoplasmata:56|Unclassified_Candidatus_Micrarchaeota:47|Unclassified_Candidatus_Woesearchaeota:43|Nitrososphaeria:43|Unclassified_Candidatus_Aenigmatarchaeota:41|Archaeoglobi:36|Unclassified_Candidatus_Bath…	Halobacteria:192|Methanomicrobia:72|Methanobacteria:26|Thermoplasmata:26|Thermococci:16|Unclassified_Archaea:15|Unclassified_Euryarchaeota:15|Unclassified_Thermoproteota:15|Nitrososphaeria:14|Unclassified_Nitrososphaerota:12|Unclassified_Candidatus_Bathyarchaeota:10|Thermoprotei:10|Unclassified_Candidatus_Korarchaeota:5|Unclassified_Candidatus_Marsarchaeota:5|Unclassified_Candidatus_Thermoplasmat…	Halobacteria:24|Methanobacteria:16|Unclassified_Candidatus_Bathyarchaeota:8|Thermoplasmata:6|Candidatus_Methanoliparia:5|Methanomicrobia:4|Unclassified_Thermoproteota:3|Unclassified_Nitrososphaerota:3|Unclassified_Euryarchaeota:3|Unclassified_Candidatus_Lokiarchaeota:2|Unclassified_Archaea:2|Thermoprotei:1|Unclassified_Candidatus_Heimdallarchaeota:1	Methanobacteria:34|Methanococci:4|Methanopyri:3|Halobacteria:2|Methanomicrobia:1|Unclassified_Candidatus_Lokiarchaeota:1|Unclassified_Archaea:1|Unclassified_Candidatus_Bathyarchaeota:1	Methanobacteria:181|Methanococci:41
M00356|Methanogenesis_methanol_=>_methane	19	3	1535	831	355	40	217	K14080+K04480+K14081:376.70+575.90+301.40|K00399+K00401+K00402:784.63+509.60+353.13|K22480+K22481+K22482,K03388+K03389+K03390,K08264+K08265,K03388+K03389+K03390+K14127+K14126+K14128,K03388+K03389+K03390+K14127+K22516+K00125:1091.73+317.13+173.50,476.07+319.40+119.33,326.40+221.27,476.07+319.40+119.33+214.77+614.10+249.53,476.07+319.40+119.33+214.77+974.67+197.07	Halobacteria:450|Unclassified_Nitrososphaerota:250|Unclassified_Archaea:162|Thermoprotei:114|Unclassified_Euryarchaeota:79|Unclassified_Thermoproteota:73|Thermococci:62|Nitrososphaeria:57|Unclassified_Candidatus_Micrarchaeota:49|Unclassified_Candidatus_Aenigmatarchaeota:41|Unclassified_Candidatus_Woesearchaeota:39|Unclassified_Candidatus_Parvarchaeota:27|Thermoplasmata:25|Unclassified_Nanoarchaeo…	Halobacteria:208|Thermoprotei:197|Unclassified_Euryarchaeota:65|Methanobacteria:51|Unclassified_Candidatus_Bathyarchaeota:42|Thermoplasmata:42|Methanomicrobia:40|Archaeoglobi:36|Unclassified_Archaea:30|Thermococci:24|Candidatus_Poseidoniia:15|Unclassified_Nitrososphaerota:14|Unclassified_Thermoproteota:11|Unclassified_Candidatus_Altiarchaeota:10|Unclassified_Candidatus_Lokiarchaeota:7|Unclassifie…	Methanobacteria:134|Methanomicrobia:129|Methanococci:45|Candidatus_Methanofastidiosa:8|Thermoplasmata:6|Unclassified_Candidatus_Verstraetearchaeota:6|Unclassified_Thermoproteota:5|Candidatus_Methanoliparia:5|Candidatus_Methanomethylicia:4|Methanopyri:3|Candidatus_Hadarchaeia:2|Unclassified_Candidatus_Nezhaarchaeota:2|Unclassified_Candidatus_Bathyarchaeota:2|Archaeoglobi:1|Hadesarchaea:1|Unclassif…	Methanomicrobia:11|Methanobacteria:9|Thermoplasmata:8|Unclassified_Euryarchaeota:7|Unclassified_Candidatus_Korarchaeota:2|Archaeoglobi:1|Candidatus_Methanomethylicia:1|Methanonatronarchaeia:1	Methanomicrobia:140|Methanobacteria:62|Thermoplasmata:7|Unclassified_Euryarchaeota:6|Methanonatronarchaeia:2
M00175|Nitrogen_fixation_nitrogen_=>_ammonia	7	1	2562	176	28	0	212	K02588+K02586+K02591,K22896+K22897+K22898+K22899:378.37+550.13+441.60,895.30+845.47+144.63+558.63	Halobacteria:657|Thermoprotei:311|Unclassified_Nitrososphaerota:264|Unclassified_Archaea:189|Methanobacteria:187|Unclassified_Euryarchaeota:145|Unclassified_Thermoproteota:89|Thermococci:86|Thermoplasmata:74|Methanomicrobia:68|Nitrososphaeria:57|Unclassified_Candidatus_Bathyarchaeota:51|Unclassified_Candidatus_Micrarchaeota:49|Unclassified_Candidatus_Woesearchaeota:43|Unclassified_Candidatus_Aeni…	Methanomicrobia:105|Methanobacteria:22|Methanococci:13|Thermoplasmata:12|Unclassified_Euryarchaeota:12|Candidatus_Methanoliparia:3|Methanopyri:3|Archaeoglobi:2|Theionarchaea:2|Halobacteria:1|Unclassified_Candidatus_Bathyarchaeota:1	Methanobacteria:14|Methanomicrobia:8|Methanococci:4|Unclassified_Archaea:1|Archaeoglobi:1	-	Methanomicrobia:142|Methanobacteria:34|Methanococci:28|Unclassified_Archaea:3|Thermoplasmata:2|Candidatus_Methanoliparia:2|Unclassified_Euryarchaeota:1
M00950|Biotin_biosynthesis_BioU_pathway_pimeloyl-ACP/CoA_=>_biotin	4	4	2203	268	240	59	208	K00652:464.80|K25570:511.13|K01935:117.40|K01012:168.67	Halobacteria:337|Methanomicrobia:301|Thermoprotei:300|Unclassified_Archaea:184|Unclassified_Euryarchaeota:151|Unclassified_Nitrososphaerota:129|Methanobacteria:125|Thermococci:85|Thermoplasmata:84|Unclassified_Thermoproteota:71|Unclassified_Candidatus_Micrarchaeota:48|Unclassified_Candidatus_Bathyarchaeota:47|Unclassified_Candidatus_Aenigmatarchaeota:41|Unclassified_Candidatus_Woesearchaeota:39|A…	Methanobacteria:102|Halobacteria:68|Unclassified_Nitrososphaerota:23|Thermoprotei:11|Methanomicrobia:10|Unclassified_Thermoproteota:8|Nitrososphaeria:8|Unclassified_Candidatus_Bathyarchaeota:5|Unclassified_Archaea:5|Unclassified_Euryarchaeota:4|Thermoplasmata:4|Unclassified_Candidatus_Woesearchaeota:4|Methanococci:2|Unclassified_Candidatus_Geothermarchaeota:2|Unclassified_Candidatus_Korarchaeota:…	Unclassified_Nitrososphaerota:111|Nitrososphaeria:39|Methanococci:39|Halobacteria:19|Methanobacteria:15|Unclassified_Thermoproteota:10|Unclassified_Euryarchaeota:3|Unclassified_Archaea:3|Methanomicrobia:1	Halobacteria:26|Methanobacteria:15|Methanomicrobia:11|Methanococci:4|Archaeoglobi:1|Unclassified_Nitrososphaerota:1|Unclassified_Archaea:1	Halobacteria:208
M00938|Pyrimidine_deoxyribonucleotide_biosynthesis_UDP_=>_dTTP	11	5	191	610	1442	529	206	K00525+K00526,K10807+K10808:363.03+46.53,1517.07+645.77|K00940,K18533:143.63,278.87|K01520:46.83|K00560,K13998,K03465:87.77,629.83,66.73|K00943:93.83	Unclassified_Nitrososphaerota:49|Unclassified_Euryarchaeota:32|Unclassified_Thermoproteota:32|Unclassified_Archaea:21|Unclassified_Nanoarchaeota:7|Unclassified_Candidatus_Parvarchaeota:7|Unclassified_Candidatus_Woesearchaeota:4|Unclassified_Candidatus_Aenigmatarchaeota:4|Archaeoglobi:4|Methanomicrobia:4|Thermoprotei:4|Unclassified_Candidatus_Bathyarchaeota:4|Thermoplasmata:4|Unclassified_Candidat…	Unclassified_Nitrososphaerota:94|Unclassified_Archaea:85|Unclassified_Euryarchaeota:59|Methanomicrobia:58|Thermoprotei:54|Unclassified_Candidatus_Bathyarchaeota:31|Halobacteria:28|Methanobacteria:25|Unclassified_Candidatus_Micrarchaeota:20|Unclassified_Candidatus_Parvarchaeota:19|Unclassified_Thermoproteota:18|Unclassified_Candidatus_Woesearchaeota:18|Nitrososphaeria:17|Unclassified_Candidatus_Ae…	Methanomicrobia:260|Thermoprotei:154|Halobacteria:151|Methanobacteria:140|Unclassified_Nitrososphaerota:120|Thermococci:85|Unclassified_Archaea:73|Thermoplasmata:64|Unclassified_Euryarchaeota:54|Methanococci:45|Unclassified_Thermoproteota:38|Nitrososphaeria:37|Archaeoglobi:29|Unclassified_Candidatus_Micrarchaeota:27|Unclassified_Candidatus_Aenigmatarchaeota:20|Unclassified_Candidatus_Bathyarchaeo…	Halobacteria:280|Thermoprotei:99|Methanobacteria:91|Unclassified_Archaea:13|Candidatus_Poseidoniia:11|Unclassified_Euryarchaeota:8|Unclassified_Candidatus_Woesearchaeota:6|Candidatus_Methanofastidiosa:3|Thermoplasmata:3|Unclassified_Candidatus_Diapherotrites:3|Unclassified_Candidatus_Heimdallarchaeota:2|Unclassified_Candidatus_Geoarchaeota:2|Nanohaloarchaea:2|Unclassified_Candidatus_Thorarchaeota…	Halobacteria:199|Unclassified_Euryarchaeota:5|Unclassified_Archaea:1|Candidatus_Poseidoniia:1
M00836|Coenzyme_F430_biosynthesis_sirohydrochlorin_=>_coenzyme_F430	5	4	2294	84	144	289	167	K22011:123.27|K22012:613.50|K21610+K21611:411.23+427.10|K21612:199.07	Halobacteria:657|Thermoprotei:311|Unclassified_Nitrososphaerota:264|Unclassified_Archaea:191|Unclassified_Euryarchaeota:146|Unclassified_Thermoproteota:87|Thermococci:86|Thermoplasmata:70|Nitrososphaeria:57|Unclassified_Candidatus_Bathyarchaeota:52|Unclassified_Candidatus_Micrarchaeota:49|Unclassified_Candidatus_Woesearchaeota:43|Unclassified_Candidatus_Aenigmatarchaeota:41|Archaeoglobi:35|Unclas…	Methanobacteria:27|Methanomicrobia:26|Thermoplasmata:9|Unclassified_Euryarchaeota:8|Methanopyri:3|Unclassified_Candidatus_Korarchaeota:2|Unclassified_Thermoproteota:2|Unclassified_Candidatus_Verstraetearchaeota:1|Candidatus_Hydrothermarchaeia:1|Candidatus_Methanomethylicia:1|Halobacteria:1|Methanonatronarchaeia:1|Archaeoglobi:1|Methanococci:1	Methanobacteria:48|Methanococci:44|Methanomicrobia:18|Thermoplasmata:9|Candidatus_Methanofastidiosa:8|Unclassified_Candidatus_Verstraetearchaeota:6|Candidatus_Methanomethylicia:4|Archaeoglobi:2|Unclassified_Euryarchaeota:2|Methanonatronarchaeia:1|Unclassified_Archaea:1|Candidatus_Methanoliparia:1	Methanobacteria:181|Methanomicrobia:101|Candidatus_Methanoliparia:4|Unclassified_Euryarchaeota:2|Methanonatronarchaeia:1	Methanomicrobia:166|Unclassified_Archaea:1
M00432|Leucine_biosynthesis_2-oxoisovalerate_=>_2-oxoisocaproate	5	3	840	1035	910	29	164	K01649:466.33|K01702,K01703+K01704:1087.70,461.53+130.77|K00052:435.77	Unclassified_Archaea:134|Unclassified_Euryarchaeota:97|Unclassified_Nitrososphaerota:74|Thermoprotei:69|Thermococci:68|Unclassified_Thermoproteota:49|Unclassified_Candidatus_Micrarchaeota:44|Unclassified_Candidatus_Aenigmatarchaeota:40|Halobacteria:38|Unclassified_Candidatus_Woesearchaeota:35|Thermoplasmata:33|Unclassified_Candidatus_Parvarchaeota:26|Candidatus_Poseidoniia:23|Unclassified_Candida…	Halobacteria:618|Methanomicrobia:70|Unclassified_Nitrososphaerota:69|Thermoprotei:54|Thermoplasmata:34|Unclassified_Archaea:30|Unclassified_Thermoproteota:29|Methanobacteria:24|Unclassified_Euryarchaeota:21|Nitrososphaeria:14|Thermococci:11|Unclassified_Candidatus_Bathyarchaeota:7|Unclassified_Candidatus_Woesearchaeota:6|Unclassified_Candidatus_Thorarchaeota:5|Unclassified_Candidatus_Altiarchaeot…	Methanomicrobia:208|Methanobacteria:179|Thermoprotei:174|Unclassified_Nitrososphaerota:120|Nitrososphaeria:35|Unclassified_Euryarchaeota:26|Unclassified_Archaea:24|Thermoplasmata:21|Archaeoglobi:18|Unclassified_Candidatus_Bathyarchaeota:17|Methanococci:16|Unclassified_Candidatus_Altiarchaeota:11|Unclassified_Thermoproteota:11|Unclassified_Candidatus_Marsarchaeota:7|Unclassified_Candidatus_Verstra…	Methanobacteria:12|Thermoprotei:6|Unclassified_Euryarchaeota:2|Methanomicrobia:2|Archaeoglobi:2|Unclassified_Archaea:2|Unclassified_Candidatus_Bathyarchaeota:2|Unclassified_Candidatus_Woesearchaeota:1	Methanobacteria:38|Methanomicrobia:33|Methanococci:28|Unclassified_Euryarchaeota:12|Archaeoglobi:10|Thermoprotei:8|Unclassified_Candidatus_Bathyarchaeota:7|Thermococci:7|Candidatus_Methanofastidiosa:4|Candidatus_Methanoliparia:3|Unclassified_Archaea:3|Unclassified_Candidatus_Altiarchaeota:2|Hadesarchaea:2|Unclassified_Candidatus_Woesearchaeota:1|Unclassified_Candidatus_Lokiarchaeota:1|Methanonatr…
M00935|Methanofuran_biosynthesis	3	3	2129	176	511	0	162	K09733:165.13|K19793:439.00|K07144:96.33	Halobacteria:594|Thermoprotei:295|Unclassified_Nitrososphaerota:259|Unclassified_Archaea:167|Unclassified_Euryarchaeota:138|Thermoplasmata:86|Thermococci:86|Unclassified_Thermoproteota:75|Nitrososphaeria:57|Unclassified_Candidatus_Micrarchaeota:48|Unclassified_Candidatus_Woesearchaeota:43|Unclassified_Candidatus_Aenigmatarchaeota:41|Unclassified_Candidatus_Bathyarchaeota:39|Unclassified_Candidatu…	Halobacteria:64|Methanobacteria:33|Methanomicrobia:23|Thermoprotei:10|Unclassified_Archaea:9|Unclassified_Candidatus_Marsarchaeota:9|Unclassified_Euryarchaeota:7|Archaeoglobi:5|Unclassified_Candidatus_Altiarchaeota:5|Unclassified_Candidatus_Lokiarchaeota:3|Thermoplasmata:2|Candidatus_Methanoliparia:2|Unclassified_Thermoproteota:2|Unclassified_Candidatus_Bathyarchaeota:1|Unclassified_Candidatus_Mi…	Methanobacteria:222|Methanomicrobia:134|Methanococci:36|Archaeoglobi:25|Unclassified_Archaea:16|Unclassified_Euryarchaeota:13|Unclassified_Thermoproteota:12|Unclassified_Candidatus_Bathyarchaeota:12|Unclassified_Candidatus_Altiarchaeota:8|Thermoprotei:6|Unclassified_Nitrososphaerota:5|Candidatus_Methanoliparia:3|Methanopyri:3|Unclassified_Candidatus_Lokiarchaeota:2|Unclassified_Candidatus_Geother…	-	Methanomicrobia:149|Methanococci:9|Unclassified_Candidatus_Altiarchaeota:1|Archaeoglobi:1|Unclassified_Candidatus_Hydrothermarchaeota:1|Unclassified_Archaea:1
M00051|De_novo_pyrimidine_biosynthesis_glutamine_(+_PRPP)_=>_UMP	15	6	392	749	763	922	152	K11540,K11541,K01954,K01955+K01956:3271.17,3398.70,2248.03,1495.57+511.87|K11540,K01465,K00609+K00610,K00608:3271.17,323.30,246.83+111.00,794.43|K11540,K01465:3271.17,323.30|K00226,K00254,K17828:257.90,178.00,251.07|K13421,K00762:368.93,117.67|K13421,K01591:368.93,115.93	Unclassified_Archaea:84|Unclassified_Nitrososphaerota:48|Unclassified_Euryarchaeota:44|Unclassified_Thermoproteota:30|Unclassified_Candidatus_Aenigmatarchaeota:25|Unclassified_Candidatus_Micrarchaeota:23|Thermoprotei:22|Unclassified_Candidatus_Parvarchaeota:20|Unclassified_Candidatus_Woesearchaeota:14|Unclassified_Nanoarchaeota:14|Nitrososphaeria:10|Methanomicrobia:7|Nanohaloarchaea:7|Candidatus_…	Thermoprotei:233|Unclassified_Nitrososphaerota:127|Unclassified_Archaea:63|Unclassified_Euryarchaeota:49|Methanomicrobia:32|Unclassified_Thermoproteota:28|Thermoplasmata:24|Unclassified_Candidatus_Bathyarchaeota:24|Halobacteria:23|Nitrososphaeria:18|Unclassified_Candidatus_Micrarchaeota:17|Unclassified_Candidatus_Woesearchaeota:16|Unclassified_Candidatus_Aenigmatarchaeota:14|Methanobacteria:14|Un…	Halobacteria:191|Unclassified_Nitrososphaerota:87|Methanobacteria:78|Thermoprotei:56|Thermococci:50|Unclassified_Euryarchaeota:43|Thermoplasmata:37|Unclassified_Archaea:32|Methanomicrobia:28|Nitrososphaeria:25|Unclassified_Thermoproteota:24|Unclassified_Candidatus_Bathyarchaeota:14|Unclassified_Candidatus_Woesearchaeota:10|Candidatus_Poseidoniia:10|Unclassified_Candidatus_Marsarchaeota:9|Candidat…	Halobacteria:441|Methanomicrobia:147|Methanobacteria:133|Methanococci:45|Thermococci:34|Archaeoglobi:23|Thermoplasmata:22|Unclassified_Euryarchaeota:17|Unclassified_Candidatus_Bathyarchaeota:11|Unclassified_Archaea:10|Unclassified_Thermoproteota:7|Nitrososphaeria:4|Unclassified_Candidatus_Altiarchaeota:3|Candidatus_Methanoliparia:3|Methanopyri:3|Unclassified_Candidatus_Woesearchaeota:2|Unclassifi…	Methanomicrobia:109|Methanobacteria:31|Unclassified_Euryarchaeota:5|Unclassified_Archaea:4|Unclassified_Candidatus_Woesearchaeota:1|Hadesarchaea:1|Candidatus_Methanoliparia:1
M00527|Lysine_biosynthesis_DAP_aminotransferase_pathway_aspartate_=>_lysine	10	7	709	946	696	476	151	K00928,K12524,K12525,K12526:352.37,750.40,770.90,465.37|K00133:218.23|K01714:258.37|K00215:136.13|K10206:377.70|K01778:65.70|K01586,K12526:305.00,465.37	Unclassified_Archaea:117|Unclassified_Euryarchaeota:100|Unclassified_Nitrososphaerota:84|Thermoprotei:53|Thermoplasmata:45|Unclassified_Candidatus_Aenigmatarchaeota:40|Unclassified_Thermoproteota:40|Unclassified_Candidatus_Micrarchaeota:39|Unclassified_Candidatus_Woesearchaeota:35|Unclassified_Candidatus_Parvarchaeota:27|Thermococci:25|Candidatus_Poseidoniia:23|Unclassified_Nanoarchaeota:16|Uncla…	Thermoprotei:258|Unclassified_Nitrososphaerota:180|Halobacteria:80|Unclassified_Archaea:67|Thermococci:61|Nitrososphaeria:49|Unclassified_Thermoproteota:42|Unclassified_Euryarchaeota:36|Unclassified_Candidatus_Bathyarchaeota:29|Thermoplasmata:22|Methanomicrobia:20|Unclassified_Candidatus_Marsarchaeota:12|Methanobacteria:9|Candidatus_Methanofastidiosa:8|Archaeoglobi:8|Unclassified_Candidatus_Verst…	Halobacteria:573|Methanobacteria:46|Methanomicrobia:23|Unclassified_Euryarchaeota:9|Unclassified_Candidatus_Bathyarchaeota:8|Hadesarchaea:5|Unclassified_Candidatus_Altiarchaeota:4|Unclassified_Candidatus_Micrarchaeota:4|Unclassified_Archaea:4|Archaeoglobi:3|Thermoplasmata:3|Unclassified_Candidatus_Woesearchaeota:2|Unclassified_Candidatus_Lokiarchaeota:2|Unclassified_Candidatus_Korarchaeota:2|Uncl…	Methanobacteria:202|Methanomicrobia:168|Methanococci:45|Thermoplasmata:18|Unclassified_Euryarchaeota:11|Unclassified_Candidatus_Altiarchaeota:8|Unclassified_Thermoproteota:6|Unclassified_Archaea:3|Methanopyri:3|Unclassified_Candidatus_Bathyarchaeota:3|Unclassified_Candidatus_Geoarchaeota:2|Unclassified_Candidatus_Diapherotrites:2|Unclassified_Candidatus_Woesearchaeota:1|Methanonatronarchaeia:1|Ca…	Methanomicrobia:111|Archaeoglobi:25|Unclassified_Candidatus_Altiarchaeota:3|Candidatus_Methanoliparia:3|Unclassified_Candidatus_Bathyarchaeota:2|Methanonatronarchaeia:2|Unclassified_Archaea:2|Unclassified_Euryarchaeota:2|Candidatus_Hydrothermarchaeia:1
M00007|Pentose_phosphate_pathway_non-oxidative_phase_fructose_6P_=>_ribose_5P	6	4	518	1685	391	235	149	K00615:206.03|K00616,K13810:143.47,642.23|K01783:256.80|K01807,K01808:51.03,179.10	Unclassified_Archaea:98|Unclassified_Euryarchaeota:66|Unclassified_Nitrososphaerota:55|Unclassified_Candidatus_Aenigmatarchaeota:39|Halobacteria:31|Unclassified_Thermoproteota:31|Unclassified_Candidatus_Micrarchaeota:29|Methanomicrobia:23|Unclassified_Candidatus_Parvarchaeota:21|Unclassified_Nanoarchaeota:16|Thermoprotei:15|Unclassified_Candidatus_Woesearchaeota:12|Thermoplasmata:10|Methanobacter…	Halobacteria:604|Methanomicrobia:279|Methanobacteria:247|Thermoprotei:98|Thermococci:83|Unclassified_Nitrososphaerota:73|Unclassified_Archaea:59|Unclassified_Euryarchaeota:40|Unclassified_Thermoproteota:33|Archaeoglobi:32|Unclassified_Candidatus_Bathyarchaeota:32|Unclassified_Candidatus_Woesearchaeota:10|Unclassified_Candidatus_Micrarchaeota:8|Unclassified_Candidatus_Altiarchaeota:7|Nitrososphaer…	Thermoprotei:196|Unclassified_Nitrososphaerota:43|Unclassified_Thermoproteota:16|Halobacteria:16|Nitrososphaeria:14|Unclassified_Euryarchaeota:14|Candidatus_Poseidoniia:12|Unclassified_Candidatus_Woesearchaeota:11|Thermoplasmata:11|Unclassified_Archaea:10|Methanomicrobia:8|Unclassified_Candidatus_Bathyarchaeota:8|Unclassified_Candidatus_Micrarchaeota:5|Unclassified_Candidatus_Altiarchaeota:4|Cand…	Unclassified_Nitrososphaerota:89|Nitrososphaeria:29|Unclassified_Archaea:24|Thermoplasmata:22|Unclassified_Euryarchaeota:12|Unclassified_Thermoproteota:9|Unclassified_Candidatus_Marsarchaeota:8|Unclassified_Candidatus_Woesearchaeota:7|Methanomicrobia:7|Unclassified_Candidatus_Bathyarchaeota:7|Unclassified_Candidatus_Micrarchaeota:7|Unclassified_Candidatus_Altiarchaeota:5|Thermoprotei:2|Unclassifi…	Methanococci:45|Thermoplasmata:38|Unclassified_Euryarchaeota:26|Methanomicrobia:6|Halobacteria:6|Unclassified_Candidatus_Thermoplasmatota:4|Candidatus_Methanofastidiosa:4|Unclassified_Nitrososphaerota:4|Unclassified_Candidatus_Woesearchaeota:3|Unclassified_Candidatus_Thorarchaeota:3|Hadesarchaea:2|Candidatus_Hadarchaeia:2|Unclassified_Archaea:2|Nitrososphaeria:2|Candidatus_Poseidoniia:1|Unclassif…
M00357|Methanogenesis_acetate_=>_methane	28	6	699	1677	266	187	149	K00925,K01895:134.27,781.30|K00625,K01895:378.60,781.30|K00193+K00197+K00194:619.67+334.03+275.80|K00577+K00578+K00579+K00580+K00581+K00584:133.07+79.93+202.23+258.10+372.47+288.83|K00399+K00401+K00402:784.63+509.60+353.13|K22480+K22481+K22482,K03388+K03389+K03390,K08264+K08265,K03388+K03389+K03390+K14127+K14126+K14128,K03388+K03389+K03390+K14127+K22516+K00125:1091.73+317.13+173.50,476.07+319.40+…	Unclassified_Archaea:108|Unclassified_Nitrososphaerota:98|Thermoprotei:60|Thermococci:58|Halobacteria:57|Unclassified_Euryarchaeota:55|Unclassified_Candidatus_Micrarchaeota:48|Unclassified_Thermoproteota:44|Unclassified_Candidatus_Aenigmatarchaeota:29|Unclassified_Candidatus_Parvarchaeota:23|Unclassified_Candidatus_Woesearchaeota:22|Unclassified_Nanoarchaeota:16|Thermoplasmata:13|Unclassified_Can…	Halobacteria:601|Thermoprotei:251|Unclassified_Nitrososphaerota:166|Methanobacteria:103|Unclassified_Euryarchaeota:93|Unclassified_Archaea:82|Thermoplasmata:62|Nitrososphaeria:47|Methanomicrobia:41|Unclassified_Thermoproteota:40|Unclassified_Candidatus_Bathyarchaeota:34|Thermococci:28|Unclassified_Candidatus_Woesearchaeota:20|Candidatus_Poseidoniia:15|Archaeoglobi:14|Unclassified_Candidatus_Altia…	Methanobacteria:98|Methanomicrobia:37|Archaeoglobi:24|Methanococci:18|Unclassified_Candidatus_Bathyarchaeota:15|Thermoplasmata:11|Unclassified_Euryarchaeota:8|Candidatus_Methanofastidiosa:7|Unclassified_Candidatus_Lokiarchaeota:6|Unclassified_Thermoproteota:5|Unclassified_Candidatus_Altiarchaeota:5|Unclassified_Candidatus_Thorarchaeota:4|Methanonatronarchaeia:3|Unclassified_Candidatus_Verstraetea…	Methanomicrobia:164|Methanobacteria:13|Methanococci:4|Candidatus_Hadarchaeia:2|Thermoplasmata:2|Hadesarchaea:1|Unclassified_Candidatus_Bathyarchaeota:1	Methanomicrobia:80|Methanobacteria:42|Methanococci:23|Unclassified_Euryarchaeota:2|Candidatus_Methanoliparia:1|Unclassified_Archaea:1
M00563|Methanogenesis_methylamine/dimethylamine/trimethylamine_=>_methane	20	4	1518	931	348	45	136	K14082:438.03|K16177,K16179,K14084:325.90,276.27,283.87|K00399+K00401+K00402:784.63+509.60+353.13|K22480+K22481+K22482,K03388+K03389+K03390,K08264+K08265,K03388+K03389+K03390+K14127+K03388+K03389+K03390+K14127+K14126+K14128,K03388+K03389+K03390+K14127+K22516+K00125:1091.73+317.13+173.50,476.07+319.40+119.33,326.40+221.27,476.07+319.40+119.33+214.77+476.07+319.40+119.33+214.77+614.10+249.53,476.07…	Halobacteria:450|Unclassified_Nitrososphaerota:247|Unclassified_Archaea:155|Thermoprotei:110|Unclassified_Euryarchaeota:80|Unclassified_Thermoproteota:73|Thermococci:62|Nitrososphaeria:57|Unclassified_Candidatus_Micrarchaeota:49|Unclassified_Candidatus_Aenigmatarchaeota:41|Unclassified_Candidatus_Woesearchaeota:39|Unclassified_Candidatus_Parvarchaeota:27|Thermoplasmata:25|Unclassified_Nanoarchaeo…	Halobacteria:208|Thermoprotei:201|Methanobacteria:79|Methanomicrobia:70|Unclassified_Euryarchaeota:68|Thermoplasmata:52|Archaeoglobi:38|Unclassified_Candidatus_Bathyarchaeota:38|Unclassified_Archaea:37|Thermococci:24|Unclassified_Nitrososphaerota:17|Candidatus_Poseidoniia:15|Unclassified_Thermoproteota:12|Unclassified_Candidatus_Altiarchaeota:10|Candidatus_Methanofastidiosa:8|Unclassified_Candida…	Methanobacteria:177|Methanomicrobia:104|Methanococci:16|Unclassified_Candidatus_Bathyarchaeota:9|Unclassified_Euryarchaeota:8|Thermoplasmata:7|Unclassified_Candidatus_Verstraetearchaeota:6|Candidatus_Methanoliparia:5|Unclassified_Thermoproteota:4|Methanopyri:3|Methanonatronarchaeia:2|Candidatus_Hadarchaeia:2|Unclassified_Candidatus_Nezhaarchaeota:2|Candidatus_Hydrothermarchaeia:1|Unclassified_Can…	Methanococci:29|Methanomicrobia:10|Thermoplasmata:4|Unclassified_Euryarchaeota:2	Methanomicrobia:136
M00926|Heme_biosynthesis_bacteria_glutamyl-tRNA_=>_coproporphyrin_III_=>_heme	15	9	703	578	1370	195	132	K02492:72.33|K01845:313.37|K01698:79.50|K01749:125.47|K01719,K13542:43.90,402.40|K01599:182.23|K00231:142.47|K03795,K03794,K01772,K02190:121.23,138.33,89.67,139.47|K00435,K25033,K22227:267.80,655.70,373.00	Unclassified_Archaea:134|Unclassified_Euryarchaeota:94|Thermococci:75|Unclassified_Nitrososphaerota:47|Unclassified_Candidatus_Aenigmatarchaeota:40|Unclassified_Candidatus_Woesearchaeota:39|Unclassified_Candidatus_Micrarchaeota:36|Thermoplasmata:33|Thermoprotei:30|Unclassified_Thermoproteota:28|Candidatus_Poseidoniia:23|Unclassified_Nanoarchaeota:17|Unclassified_Candidatus_Parvarchaeota:16|Unclas…	Unclassified_Nitrososphaerota:110|Unclassified_Thermoproteota:50|Methanobacteria:50|Thermoprotei:47|Methanomicrobia:44|Unclassified_Euryarchaeota:37|Unclassified_Archaea:37|Halobacteria:36|Unclassified_Candidatus_Bathyarchaeota:33|Thermoplasmata:18|Nitrososphaeria:17|Unclassified_Candidatus_Parvarchaeota:11|Thermococci:11|Unclassified_Candidatus_Micrarchaeota:10|Archaeoglobi:7|Candidatus_Methanof…	Halobacteria:367|Methanomicrobia:271|Thermoprotei:232|Methanobacteria:207|Unclassified_Nitrososphaerota:94|Methanococci:42|Nitrososphaeria:37|Archaeoglobi:26|Unclassified_Euryarchaeota:23|Unclassified_Archaea:15|Thermoplasmata:15|Unclassified_Thermoproteota:9|Candidatus_Methanomethylicia:4|Candidatus_Methanoliparia:4|Methanopyri:3|Unclassified_Candidatus_Micrarchaeota:3|Unclassified_Candidatus_Ba…	Halobacteria:121|Thermoplasmata:22|Unclassified_Nitrososphaerota:13|Unclassified_Candidatus_Marsarchaeota:7|Unclassified_Archaea:6|Methanomicrobia:5|Unclassified_Candidatus_Verstraetearchaeota:4|Unclassified_Euryarchaeota:3|Unclassified_Thermoproteota:2|Thermoprotei:2|Unclassified_Candidatus_Heimdallarchaeota:2|Archaeoglobi:2|Methanonatronarchaeia:1|Unclassified_Candidatus_Bathyarchaeota:1|Candid…	Halobacteria:129|Candidatus_Hydrothermarchaeia:1|Unclassified_Euryarchaeota:1|Unclassified_Archaea:1
M00364|C10-C20_isoprenoid_biosynthesis_bacteria	4	2	1282	0	1565	0	131	K01823:45.03|K00795,K13789,K13787:399.73,364.53,296.43	Thermoprotei:195|Methanomicrobia:166|Unclassified_Archaea:146|Unclassified_Nitrososphaerota:123|Unclassified_Euryarchaeota:111|Thermoplasmata:64|Unclassified_Thermoproteota:47|Methanobacteria:46|Unclassified_Candidatus_Bathyarchaeota:32|Archaeoglobi:31|Unclassified_Candidatus_Micrarchaeota:31|Methanococci:30|Unclassified_Candidatus_Woesearchaeota:29|Halobacteria:29|Unclassified_Candidatus_Parvarc…	-	Halobacteria:576|Methanobacteria:211|Methanomicrobia:155|Thermoprotei:116|Unclassified_Nitrososphaerota:85|Thermococci:84|Unclassified_Euryarchaeota:47|Unclassified_Archaea:45|Unclassified_Thermoproteota:40|Thermoplasmata:24|Unclassified_Candidatus_Bathyarchaeota:20|Unclassified_Candidatus_Aenigmatarchaeota:19|Candidatus_Poseidoniia:19|Unclassified_Candidatus_Micrarchaeota:17|Nitrososphaeria:17|M…	-	Unclassified_Nitrososphaerota:56|Halobacteria:53|Nitrososphaeria:15|Unclassified_Thermoproteota:2|Methanomicrobia:2|Unclassified_Archaea:2|Unclassified_Candidatus_Micrarchaeota:1
M00365|C10-C20_isoprenoid_biosynthesis_archaea	2	2	1284	0	1563	0	131	K01823:45.03|K13787:296.43	Thermoprotei:195|Methanomicrobia:166|Unclassified_Archaea:146|Unclassified_Nitrososphaerota:123|Unclassified_Euryarchaeota:113|Thermoplasmata:64|Unclassified_Thermoproteota:47|Methanobacteria:46|Unclassified_Candidatus_Bathyarchaeota:32|Archaeoglobi:31|Unclassified_Candidatus_Micrarchaeota:31|Methanococci:30|Unclassified_Candidatus_Woesearchaeota:29|Halobacteria:29|Unclassified_Candidatus_Parvarc…	-	Halobacteria:576|Methanobacteria:211|Methanomicrobia:155|Thermoprotei:116|Unclassified_Nitrososphaerota:85|Thermococci:84|Unclassified_Archaea:45|Unclassified_Euryarchaeota:45|Unclassified_Thermoproteota:40|Thermoplasmata:24|Unclassified_Candidatus_Bathyarchaeota:20|Unclassified_Candidatus_Aenigmatarchaeota:19|Candidatus_Poseidoniia:19|Unclassified_Candidatus_Micrarchaeota:17|Nitrososphaeria:17|M…	-	Unclassified_Nitrososphaerota:56|Halobacteria:53|Nitrososphaeria:15|Unclassified_Thermoproteota:2|Methanomicrobia:2|Unclassified_Archaea:2|Unclassified_Candidatus_Micrarchaeota:1
M00091|Phosphatidylcholine_(PC)_biosynthesis_PE_=>_PC	4	2	2864	0	0	0	114	K00551,K16369,K00570:84.83,518.80,98.03|K00551,K00550,K00570:84.83,77.30,98.03	Halobacteria:617|Thermoprotei:311|Methanomicrobia:288|Unclassified_Nitrososphaerota:264|Methanobacteria:257|Unclassified_Archaea:193|Unclassified_Euryarchaeota:157|Unclassified_Thermoproteota:89|Thermoplasmata:88|Nitrososphaeria:56|Unclassified_Candidatus_Bathyarchaeota:52|Thermococci:52|Unclassified_Candidatus_Micrarchaeota:49|Methanococci:45|Unclassified_Candidatus_Woesearchaeota:41|Unclassifie…	-	-	-	Halobacteria:41|Methanomicrobia:35|Thermococci:34|Unclassified_Candidatus_Woesearchaeota:2|Unclassified_Euryarchaeota:1|Nitrososphaeria:1
M00023|Tryptophan_biosynthesis_chorismate_=>_tryptophan	15	5	732	512	982	640	112	K01657+K01658,K13503,K13501,K01656,K13497:469.00+241.67,480.50,965.23,772.20,577.50|K00766,K13497:143.90,577.50|K01817,K24017,K13498,K13501:205.57,288.73,421.87,965.23|K01656,K01609,K13498,K13501:772.20,321.20,421.87,965.23|K01695+K01696,K01695+K06001,K01694:85.93+630.77,85.93+458.60,873.43	Unclassified_Archaea:129|Unclassified_Euryarchaeota:95|Unclassified_Nitrososphaerota:87|Thermoprotei:45|Unclassified_Candidatus_Woesearchaeota:41|Unclassified_Candidatus_Aenigmatarchaeota:40|Unclassified_Candidatus_Micrarchaeota:39|Thermoplasmata:39|Unclassified_Thermoproteota:36|Unclassified_Candidatus_Parvarchaeota:26|Candidatus_Poseidoniia:23|Thermococci:19|Unclassified_Nanoarchaeota:17|Unclas…	Thermoprotei:63|Thermococci:54|Methanomicrobia:47|Unclassified_Nitrososphaerota:47|Unclassified_Thermoproteota:34|Halobacteria:33|Thermoplasmata:31|Unclassified_Archaea:29|Unclassified_Euryarchaeota:26|Unclassified_Candidatus_Bathyarchaeota:23|Methanobacteria:21|Archaeoglobi:15|Unclassified_Candidatus_Altiarchaeota:11|Unclassified_Candidatus_Marsarchaeota:8|Candidatus_Methanofastidiosa:7|Candidat…	Thermoprotei:203|Halobacteria:198|Methanomicrobia:132|Unclassified_Nitrososphaerota:123|Methanobacteria:94|Methanococci:44|Nitrososphaeria:44|Unclassified_Archaea:26|Unclassified_Euryarchaeota:25|Unclassified_Thermoproteota:18|Archaeoglobi:16|Thermococci:13|Unclassified_Candidatus_Bathyarchaeota:8|Thermoplasmata:8|Unclassified_Candidatus_Micrarchaeota:6|Candidatus_Methanoliparia:4|Unclassified_Ca…	Halobacteria:421|Methanomicrobia:135|Methanobacteria:42|Unclassified_Archaea:8|Unclassified_Nitrososphaerota:7|Unclassified_Candidatus_Bathyarchaeota:7|Unclassified_Euryarchaeota:5|Unclassified_Candidatus_Altiarchaeota:3|Methanopyri:3|Hadesarchaea:3|Candidatus_Hydrothermarchaeia:1|Methanococci:1|Unclassified_Thermoproteota:1|Unclassified_Candidatus_Diapherotrites:1|Candidatus_Bathyarchaeia:1|Ther…	Methanobacteria:94|Thermoplasmata:9|Unclassified_Euryarchaeota:7|Unclassified_Archaea:1|Methanomicrobia:1
M00309|Non-phosphorylative_Entner-Doudoroff_pathway_gluconate/galactonate_=>_glycerate	8	3	1400	950	507	10	111	K05308:423.10|K11395,K18127:320.23,308.03|K18020+K18021+K18022,K18128,K03738:1222.67+398.67+283.80,939.33,304.73	Methanobacteria:257|Unclassified_Nitrososphaerota:244|Unclassified_Archaea:134|Unclassified_Euryarchaeota:121|Methanomicrobia:91|Unclassified_Thermoproteota:62|Nitrososphaeria:57|Thermoplasmata:55|Halobacteria:48|Methanococci:45|Unclassified_Candidatus_Micrarchaeota:44|Unclassified_Candidatus_Woesearchaeota:40|Unclassified_Candidatus_Aenigmatarchaeota:35|Unclassified_Candidatus_Parvarchaeota:27|T…	Methanomicrobia:232|Halobacteria:179|Thermoprotei:108|Thermococci:85|Unclassified_Archaea:54|Unclassified_Candidatus_Bathyarchaeota:45|Unclassified_Euryarchaeota:37|Archaeoglobi:37|Unclassified_Thermoproteota:25|Thermoplasmata:23|Unclassified_Nitrososphaerota:20|Candidatus_Methanofastidiosa:8|Unclassified_Candidatus_Marsarchaeota:7|Unclassified_Candidatus_Verstraetearchaeota:7|Unclassified_Candid…	Halobacteria:431|Thermoprotei:58|Thermoplasmata:9|Unclassified_Archaea:4|Unclassified_Candidatus_Marsarchaeota:3|Unclassified_Thermoproteota:2	Thermoprotei:10	Thermoprotei:109|Thermoplasmata:1|Unclassified_Archaea:1
M00020|Serine_biosynthesis_glycerate-3P_=>_serine	6	3	667	875	1325	0	111	K00058:325.70|K00831:130.07|K01079,K02203,K22305,K25528:126.90,162.80,223.70,233.87	Unclassified_Archaea:118|Unclassified_Nitrososphaerota:76|Unclassified_Euryarchaeota:63|Thermoprotei:47|Unclassified_Candidatus_Micrarchaeota:44|Unclassified_Thermoproteota:44|Unclassified_Candidatus_Aenigmatarchaeota:39|Thermoplasmata:37|Unclassified_Candidatus_Woesearchaeota:33|Unclassified_Candidatus_Parvarchaeota:25|Methanomicrobia:24|Halobacteria:19|Unclassified_Candidatus_Bathyarchaeota:15|…	Thermoprotei:260|Methanomicrobia:118|Unclassified_Nitrososphaerota:101|Unclassified_Euryarchaeota:72|Halobacteria:44|Unclassified_Archaea:43|Unclassified_Thermoproteota:36|Thermoplasmata:29|Methanobacteria:29|Unclassified_Candidatus_Bathyarchaeota:28|Nitrososphaeria:17|Thermococci:14|Unclassified_Candidatus_Woesearchaeota:9|Candidatus_Poseidoniia:8|Candidatus_Methanofastidiosa:8|Archaeoglobi:8|Un…	Halobacteria:595|Methanobacteria:226|Methanomicrobia:87|Unclassified_Nitrososphaerota:87|Thermococci:71|Methanococci:45|Unclassified_Archaea:32|Nitrososphaeria:32|Archaeoglobi:26|Unclassified_Euryarchaeota:21|Thermoplasmata:16|Unclassified_Candidatus_Altiarchaeota:11|Unclassified_Candidatus_Bathyarchaeota:9|Unclassified_Thermoproteota:9|Unclassified_Candidatus_Marsarchaeota:8|Unclassified_Candida…	-	Methanomicrobia:94|Thermoplasmata:6|Candidatus_Poseidoniia:5|Unclassified_Candidatus_Thorarchaeota:4|Unclassified_Euryarchaeota:2
M00633|Semi-phosphorylative_Entner-Doudoroff_pathway_gluconate/galactonate_=>_glycerate-3P	4	4	2008	581	241	39	109	K05308:423.10|K18126:404.33|K11395:320.23|K18978:555.07	Methanomicrobia:321|Methanobacteria:257|Unclassified_Nitrososphaerota:243|Unclassified_Archaea:166|Unclassified_Euryarchaeota:153|Thermoprotei:77|Thermoplasmata:77|Halobacteria:74|Unclassified_Thermoproteota:70|Thermococci:60|Nitrososphaeria:57|Unclassified_Candidatus_Bathyarchaeota:49|Unclassified_Candidatus_Micrarchaeota:48|Methanococci:45|Unclassified_Candidatus_Woesearchaeota:43|Unclassified_…	Halobacteria:389|Thermoprotei:63|Thermococci:26|Unclassified_Archaea:18|Unclassified_Thermoproteota:17|Unclassified_Candidatus_Parvarchaeota:16|Unclassified_Nitrososphaerota:15|Thermoplasmata:10|Unclassified_Candidatus_Marsarchaeota:5|Unclassified_Euryarchaeota:5|Unclassified_Candidatus_Geoarchaeota:3|Unclassified_Candidatus_Bathyarchaeota:3|Methanomicrobia:2|Unclassified_Nanoarchaeota:2|Candidat…	Halobacteria:195|Thermoprotei:32|Unclassified_Nitrososphaerota:6|Unclassified_Archaea:5|Thermoplasmata:1|Unclassified_Thermoproteota:1|Unclassified_Candidatus_Marsarchaeota:1	Thermoprotei:31|Unclassified_Archaea:3|Unclassified_Candidatus_Marsarchaeota:3|Unclassified_Thermoproteota:1|Unclassified_Candidatus_Geoarchaeota:1	Thermoprotei:108|Unclassified_Archaea:1
M00009|Citrate_cycle_(TCA_cycle_Krebs_cycle)	36	8	340	1527	493	513	105	K01647,K05942:368.13,340.50|K01681,K01682:1310.87,675.17|K00031,K00030:155.37,430.30|K00164+K00658+K00382,K01616+K00382,K00174+K00175:1210.03+450.77+457.27,1321.43+457.27,258.93+235.40|K01902+K01903,K01899+K01900,K18118:361.23+499.70,574.47+593.50,689.17|K00234+K00235+K00236+K00237,K00234+K00235+K00236+K25801,K00239+K00240+K00241,K00244+K00245+K00246:1147.23+472.50+138.30+94.90,1147.23+472.50+138…	Unclassified_Archaea:98|Unclassified_Euryarchaeota:47|Unclassified_Nitrososphaerota:37|Unclassified_Candidatus_Woesearchaeota:22|Unclassified_Thermoproteota:22|Unclassified_Candidatus_Aenigmatarchaeota:20|Unclassified_Candidatus_Micrarchaeota:15|Unclassified_Candidatus_Diapherotrites:12|Unclassified_Candidatus_Altiarchaeota:10|Unclassified_Candidatus_Parvarchaeota:10|Methanomicrobia:8|Unclassifie…	Methanobacteria:254|Unclassified_Nitrososphaerota:214|Methanomicrobia:166|Thermoprotei:149|Thermococci:84|Unclassified_Archaea:79|Unclassified_Euryarchaeota:79|Halobacteria:67|Thermoplasmata:55|Unclassified_Thermoproteota:53|Nitrososphaeria:52|Unclassified_Candidatus_Bathyarchaeota:45|Methanococci:45|Unclassified_Candidatus_Aenigmatarchaeota:21|Unclassified_Candidatus_Woesearchaeota:21|Unclassifi…	Thermoprotei:131|Methanomicrobia:128|Halobacteria:77|Thermoplasmata:23|Unclassified_Euryarchaeota:22|Unclassified_Archaea:13|Unclassified_Candidatus_Micrarchaeota:13|Unclassified_Nitrososphaerota:13|Candidatus_Poseidoniia:12|Unclassified_Thermoproteota:11|Unclassified_Candidatus_Parvarchaeota:10|Archaeoglobi:9|Unclassified_Candidatus_Korarchaeota:4|Unclassified_Candidatus_Lokiarchaeota:3|Candidat…	Halobacteria:408|Thermoprotei:29|Methanomicrobia:21|Archaeoglobi:14|Unclassified_Euryarchaeota:10|Unclassified_Candidatus_Micrarchaeota:6|Unclassified_Candidatus_Marsarchaeota:6|Candidatus_Poseidoniia:6|Thermoplasmata:3|Unclassified_Archaea:3|Unclassified_Thermoproteota:3|Unclassified_Candidatus_Geothermarchaeota:1|Unclassified_Candidatus_Geoarchaeota:1|Unclassified_Candidatus_Heimdallarchaeota:1…	Halobacteria:105
M00168|CAM_(Crassulacean_acid_metabolism)_dark	4	2	1729	0	1145	0	104	K01595:46.33|K00025,K00026,K00024:534.00,515.87,371.37	Methanobacteria:238|Unclassified_Nitrososphaerota:233|Unclassified_Archaea:164|Methanomicrobia:137|Unclassified_Euryarchaeota:125|Halobacteria:92|Thermoprotei:89|Unclassified_Thermoproteota:74|Thermoplasmata:65|Nitrososphaeria:57|Thermococci:48|Unclassified_Candidatus_Micrarchaeota:46|Methanococci:43|Unclassified_Candidatus_Bathyarchaeota:42|Unclassified_Candidatus_Aenigmatarchaeota:41|Unclassifi…	-	Halobacteria:566|Thermoprotei:222|Methanomicrobia:85|Thermococci:38|Unclassified_Euryarchaeota:32|Unclassified_Nitrososphaerota:31|Unclassified_Archaea:29|Thermoplasmata:23|Methanobacteria:19|Archaeoglobi:18|Candidatus_Poseidoniia:16|Unclassified_Thermoproteota:15|Unclassified_Candidatus_Bathyarchaeota:10|Unclassified_Candidatus_Woesearchaeota:9|Unclassified_Candidatus_Verstraetearchaeota:3|Uncla…	-	Methanomicrobia:101|Unclassified_Candidatus_Woesearchaeota:1|Unclassified_Candidatus_Heimdallarchaeota:1|Unclassified_Euryarchaeota:1
M00035|Methionine_degradation	8	4	463	683	1138	625	69	K00789:18.20|K00552,K00558,K17398,K17399:207.00,162.13,1022.20,1159.93|K01251:76.33|K01697,K10150:449.77,436.80	Methanobacteria:80|Unclassified_Archaea:77|Unclassified_Euryarchaeota:68|Unclassified_Nitrososphaerota:51|Unclassified_Candidatus_Aenigmatarchaeota:27|Unclassified_Thermoproteota:21|Methanomicrobia:17|Unclassified_Candidatus_Parvarchaeota:17|Unclassified_Nanoarchaeota:13|Unclassified_Candidatus_Woesearchaeota:12|Thermoplasmata:12|Unclassified_Candidatus_Micrarchaeota:9|Halobacteria:8|Unclassified…	Methanomicrobia:113|Unclassified_Nitrososphaerota:100|Methanobacteria:98|Halobacteria:70|Unclassified_Archaea:52|Unclassified_Euryarchaeota:36|Unclassified_Candidatus_Micrarchaeota:24|Unclassified_Thermoproteota:24|Thermoplasmata:23|Archaeoglobi:18|Thermoprotei:18|Unclassified_Candidatus_Bathyarchaeota:15|Candidatus_Poseidoniia:13|Nitrososphaeria:12|Unclassified_Candidatus_Woesearchaeota:9|Unclas…	Halobacteria:367|Methanomicrobia:155|Unclassified_Nitrososphaerota:94|Methanobacteria:69|Unclassified_Archaea:53|Unclassified_Euryarchaeota:46|Thermococci:46|Methanococci:40|Thermoplasmata:39|Thermoprotei:32|Nitrososphaeria:30|Unclassified_Candidatus_Bathyarchaeota:27|Unclassified_Thermoproteota:20|Unclassified_Candidatus_Woesearchaeota:18|Unclassified_Candidatus_Micrarchaeota:13|Archaeoglobi:12|…	Halobacteria:213|Thermoprotei:211|Methanomicrobia:38|Thermococci:32|Unclassified_Thermoproteota:17|Unclassified_Nitrososphaerota:16|Thermoplasmata:14|Methanobacteria:10|Unclassified_Archaea:9|Nitrososphaeria:8|Unclassified_Euryarchaeota:8|Unclassified_Candidatus_Aenigmatarchaeota:6|Unclassified_Candidatus_Woesearchaeota:4|Unclassified_Candidatus_Thorarchaeota:4|Archaeoglobi:4|Unclassified_Candida…	Thermoprotei:47|Unclassified_Thermoproteota:7|Thermococci:7|Unclassified_Nitrososphaerota:3|Unclassified_Archaea:2|Unclassified_Candidatus_Geothermarchaeota:2|Unclassified_Candidatus_Micrarchaeota:1
M00006|Pentose_phosphate_pathway_oxidative_phase_glucose_6P_=>_ribulose_5P	6	3	2239	135	538	0	66	K13937,K00036,K19243:473.93,370.97,263.87|K13937,K01057,K07404:473.93,114.33,129.30|K00033:145.90	Methanomicrobia:314|Thermoprotei:311|Methanobacteria:257|Unclassified_Nitrososphaerota:242|Unclassified_Archaea:170|Unclassified_Euryarchaeota:153|Thermoplasmata:88|Thermococci:86|Unclassified_Thermoproteota:82|Nitrososphaeria:51|Unclassified_Candidatus_Micrarchaeota:45|Unclassified_Candidatus_Bathyarchaeota:45|Methanococci:45|Unclassified_Candidatus_Aenigmatarchaeota:41|Archaeoglobi:38|Unclassif…	Halobacteria:59|Unclassified_Nitrososphaerota:22|Unclassified_Archaea:10|Methanomicrobia:9|Unclassified_Thermoproteota:7|Nitrososphaeria:5|Unclassified_Candidatus_Micrarchaeota:4|Unclassified_Euryarchaeota:4|Unclassified_Candidatus_Bathyarchaeota:4|Unclassified_Candidatus_Woesearchaeota:3|Unclassified_Candidatus_Heimdallarchaeota:2|Unclassified_Candidatus_Geoarchaeota:2|Unclassified_Nanoarchaeota…	Halobacteria:520|Unclassified_Archaea:9|Unclassified_Candidatus_Bathyarchaeota:3|Unclassified_Candidatus_Woesearchaeota:3|Nitrososphaeria:1|Unclassified_Euryarchaeota:1|Nanohaloarchaea:1	-	Halobacteria:60|Unclassified_Archaea:4|Unclassified_Candidatus_Heimdallarchaeota:1|Unclassified_Candidatus_Diapherotrites:1
M00554|Nucleotide_sugar_biosynthesis_galactose_=>_UDP-galactose	2	2	2176	0	755	0	47	K00849:371.37|K00965:116.17	Halobacteria:567|Methanobacteria:257|Thermoprotei:213|Methanomicrobia:162|Unclassified_Euryarchaeota:145|Unclassified_Archaea:143|Unclassified_Nitrososphaerota:112|Thermoplasmata:83|Unclassified_Thermoproteota:51|Methanococci:45|Thermococci:45|Archaeoglobi:38|Unclassified_Candidatus_Aenigmatarchaeota:38|Unclassified_Candidatus_Woesearchaeota:29|Unclassified_Candidatus_Micrarchaeota:26|Unclassifie…	-	Methanomicrobia:161|Unclassified_Nitrososphaerota:152|Thermoprotei:98|Halobacteria:80|Unclassified_Archaea:50|Nitrososphaeria:40|Unclassified_Thermoproteota:38|Unclassified_Candidatus_Bathyarchaeota:27|Unclassified_Candidatus_Micrarchaeota:23|Unclassified_Candidatus_Parvarchaeota:14|Unclassified_Candidatus_Woesearchaeota:14|Unclassified_Euryarchaeota:13|Unclassified_Candidatus_Marsarchaeota:9|The…	-	Thermococci:32|Halobacteria:11|Unclassified_Candidatus_Lokiarchaeota:2|Thermoplasmata:1|Unclassified_Candidatus_Altiarchaeota:1
M00851|Carbapenem_resistance	21	1	2931	0	0	0	47	K18768,K18970,K19316,K22346,K18794,K19318,K18971,K18793,K19319,K19320,K19321,K19322,K18972,K19211,K18976,K21277,K18782,K18781,K18780,K19099,K19216:675.47,661.73,629.60,693.83,636.40,596.87,609.70,599.43,601.00,627.53,655.90,652.10,673.03,554.87,602.23,597.33,508.77,544.13,601.60,-,509.27	Halobacteria:651|Methanomicrobia:323|Thermoprotei:308|Unclassified_Nitrososphaerota:264|Methanobacteria:236|Unclassified_Archaea:193|Unclassified_Euryarchaeota:157|Unclassified_Thermoproteota:89|Thermoplasmata:88|Thermococci:81|Nitrososphaeria:57|Unclassified_Candidatus_Bathyarchaeota:51|Unclassified_Candidatus_Micrarchaeota:49|Methanococci:45|Unclassified_Candidatus_Woesearchaeota:43|Unclassifie…	-	-	-	Methanobacteria:21|Halobacteria:7|Thermococci:5|Thermoprotei:3|Unclassified_Candidatus_Altiarchaeota:3|Candidatus_Methanomethylicia:2|Unclassified_Candidatus_Geothermarchaeota:1|Archaeoglobi:1|Unclassified_Candidatus_Odinarchaeota:1|Unclassified_Candidatus_Verstraetearchaeota:1|Unclassified_Candidatus_Bathyarchaeota:1|Unclassified_Euryarchaeota:1
M00338|Cysteine_biosynthesis_homocysteine_+_serine_=>_cysteine	3	2	2455	0	485	0	38	K01697,K10150:449.77,436.80|K01758:593.53	Methanomicrobia:320|Halobacteria:296|Thermoprotei:261|Methanobacteria:257|Unclassified_Nitrososphaerota:255|Unclassified_Archaea:171|Unclassified_Euryarchaeota:146|Unclassified_Thermoproteota:77|Thermoplasmata:76|Thermococci:65|Nitrososphaeria:57|Unclassified_Candidatus_Bathyarchaeota:49|Unclassified_Candidatus_Micrarchaeota:47|Methanococci:45|Unclassified_Candidatus_Woesearchaeota:43|Unclassifie…	-	Halobacteria:362|Thermoprotei:48|Unclassified_Archaea:16|Thermoplasmata:12|Unclassified_Euryarchaeota:11|Unclassified_Thermoproteota:10|Unclassified_Nitrososphaerota:9|Candidatus_Poseidoniia:7|Unclassified_Candidatus_Bathyarchaeota:3|Unclassified_Candidatus_Heimdallarchaeota:2|Conexivisphaeria:1|Thermococci:1|Archaeoglobi:1|Methanomicrobia:1|Unclassified_Candidatus_Micrarchaeota:1	-	Thermococci:20|Unclassified_Archaea:6|Unclassified_Thermoproteota:2|Unclassified_Candidatus_Geothermarchaeota:2|Thermoprotei:2|Methanomicrobia:2|Unclassified_Candidatus_Micrarchaeota:1|Archaeoglobi:1|Unclassified_Euryarchaeota:1|Unclassified_Candidatus_Marsarchaeota:1
M00854|Glycogen_biosynthesis_glucose-1P_=>_glycogen/starch	11	3	1972	843	130	0	33	K00963,K00975:77.70,194.97|K00693+K00750,K16150,K16153,K13679,K20812,K00703,K13679,K20812:410.87+183.70,293.33,1748.47,652.50,772.20,129.90,652.50,772.20|K00700,K16149:282.43,331.50	Halobacteria:621|Methanomicrobia:252|Unclassified_Nitrososphaerota:248|Unclassified_Archaea:149|Unclassified_Euryarchaeota:133|Thermoprotei:68|Unclassified_Thermoproteota:59|Nitrososphaeria:57|Thermoplasmata:57|Unclassified_Candidatus_Micrarchaeota:39|Archaeoglobi:35|Unclassified_Candidatus_Aenigmatarchaeota:33|Unclassified_Candidatus_Parvarchaeota:26|Candidatus_Poseidoniia:23|Unclassified_Candid…	Thermoprotei:241|Methanobacteria:216|Methanomicrobia:59|Unclassified_Archaea:38|Halobacteria:37|Thermoplasmata:31|Methanococci:29|Unclassified_Candidatus_Bathyarchaeota:28|Unclassified_Thermoproteota:27|Unclassified_Candidatus_Woesearchaeota:21|Unclassified_Euryarchaeota:20|Unclassified_Nitrososphaerota:16|Unclassified_Candidatus_Marsarchaeota:10|Unclassified_Candidatus_Micrarchaeota:10|Unclassif…	Thermococci:47|Methanobacteria:18|Methanococci:15|Methanomicrobia:12|Unclassified_Archaea:6|Unclassified_Candidatus_Altiarchaeota:6|Candidatus_Methanomethylicia:5|Unclassified_Euryarchaeota:5|Unclassified_Candidatus_Lokiarchaeota:4|Unclassified_Thermoproteota:3|Unclassified_Candidatus_Heimdallarchaeota:2|Thermoprotei:2|Unclassified_Candidatus_Diapherotrites:2|Unclassified_Candidatus_Verstraetearc…	-	Thermococci:33
M00881|Lipoic_acid_biosynthesis_plants_and_bacteria_octanoyl-ACP_=>_dihydrolipoyl-E2/H	2	2	2052	0	894	0	32	K03801:256.77|K03644:131.40	Methanomicrobia:311|Methanobacteria:257|Unclassified_Nitrososphaerota:241|Thermoprotei:186|Unclassified_Archaea:170|Unclassified_Euryarchaeota:123|Thermococci:85|Unclassified_Thermoproteota:79|Halobacteria:65|Nitrososphaeria:51|Unclassified_Candidatus_Bathyarchaeota:51|Thermoplasmata:47|Methanococci:45|Unclassified_Candidatus_Micrarchaeota:42|Unclassified_Candidatus_Aenigmatarchaeota:41|Unclassif…	-	Halobacteria:593|Thermoprotei:123|Thermoplasmata:39|Unclassified_Euryarchaeota:33|Candidatus_Poseidoniia:18|Unclassified_Archaea:16|Unclassified_Nitrososphaerota:14|Methanomicrobia:12|Unclassified_Thermoproteota:10|Unclassified_Candidatus_Micrarchaeota:7|Nitrososphaeria:6|Unclassified_Candidatus_Woesearchaeota:5|Unclassified_Candidatus_Geoarchaeota:4|Unclassified_Candidatus_Heimdallarchaeota:3|Un…	-	Unclassified_Candidatus_Marsarchaeota:10|Unclassified_Nitrososphaerota:9|Unclassified_Archaea:7|Unclassified_Euryarchaeota:2|Thermoprotei:2|Thermoplasmata:2
M00026|Histidine_biosynthesis_PRPP_=>_histidine	17	8	820	651	605	877	25	K00765:40.97|K01523,K11755,K14152:127.03,207.03,851.77|K01496,K11755,K14152:196.93,207.03,851.77|K01814,K24017:252.83,288.73|K02501+K02500,K01663:241.33+342.97,364.60|K01693,K01089:292.07,318.33|K00817,K01089,K04486,K05602,K18649:283.50,318.33,122.60,257.53,402.33|K00013,K14152:519.97,851.77	Unclassified_Archaea:128|Unclassified_Euryarchaeota:101|Unclassified_Nitrososphaerota:96|Thermoprotei:77|Unclassified_Thermoproteota:56|Thermoplasmata:51|Unclassified_Candidatus_Micrarchaeota:43|Thermococci:41|Unclassified_Candidatus_Aenigmatarchaeota:38|Unclassified_Candidatus_Woesearchaeota:33|Unclassified_Candidatus_Parvarchaeota:26|Candidatus_Poseidoniia:23|Unclassified_Candidatus_Bathyarchae…	Thermoprotei:234|Unclassified_Nitrososphaerota:108|Unclassified_Archaea:48|Nitrososphaeria:35|Methanomicrobia:32|Halobacteria:26|Unclassified_Thermoproteota:24|Unclassified_Euryarchaeota:23|Methanobacteria:17|Unclassified_Candidatus_Altiarchaeota:13|Unclassified_Candidatus_Bathyarchaeota:12|Unclassified_Candidatus_Marsarchaeota:10|Unclassified_Candidatus_Woesearchaeota:9|Thermoplasmata:8|Archaeog…	Methanobacteria:181|Halobacteria:88|Methanomicrobia:77|Unclassified_Nitrososphaerota:60|Methanococci:44|Thermococci:40|Unclassified_Euryarchaeota:18|Unclassified_Candidatus_Bathyarchaeota:17|Thermoplasmata:15|Archaeoglobi:12|Nitrososphaeria:12|Unclassified_Archaea:8|Unclassified_Candidatus_Altiarchaeota:5|Unclassified_Thermoproteota:5|Unclassified_Candidatus_Micrarchaeota:3|Methanopyri:3|Unclassi…	Halobacteria:517|Methanomicrobia:213|Methanobacteria:59|Archaeoglobi:16|Unclassified_Euryarchaeota:16|Thermoplasmata:14|Unclassified_Archaea:8|Candidatus_Methanofastidiosa:7|Unclassified_Candidatus_Verstraetearchaeota:5|Candidatus_Methanomethylicia:4|Unclassified_Thermoproteota:4|Methanonatronarchaeia:3|Unclassified_Candidatus_Bathyarchaeota:3|Candidatus_Methanoliparia:2|Candidatus_Hydrothermarch…	Halobacteria:24|Unclassified_Archaea:1
M00149|Succinate_dehydrogenase_prokaryotes	6	1	1537	270	578	571	22	K00241+K00242+K00239+K00240,K00241+K18859+K00239+K00240,K00241+K18860+K00239+K00240:56.13+58.73+651.07+140.63,56.13+144.17+651.07+140.63,56.13+127.53+651.07+140.63	Methanomicrobia:276|Methanobacteria:201|Unclassified_Archaea:163|Unclassified_Euryarchaeota:115|Unclassified_Nitrososphaerota:112|Thermococci:85|Unclassified_Thermoproteota:68|Thermoprotei:64|Thermoplasmata:50|Methanococci:45|Unclassified_Candidatus_Bathyarchaeota:43|Unclassified_Candidatus_Woesearchaeota:42|Unclassified_Candidatus_Aenigmatarchaeota:41|Halobacteria:29|Unclassified_Candidatus_Micr…	Unclassified_Nitrososphaerota:56|Thermoprotei:53|Methanobacteria:43|Halobacteria:26|Unclassified_Archaea:14|Nitrososphaeria:13|Unclassified_Euryarchaeota:12|Unclassified_Thermoproteota:10|Methanomicrobia:9|Unclassified_Candidatus_Bathyarchaeota:8|Thermoplasmata:6|Archaeoglobi:5|Unclassified_Candidatus_Marsarchaeota:3|Candidatus_Poseidoniia:3|Unclassified_Candidatus_Micrarchaeota:2|Unclassified_Ca…	Thermoprotei:167|Unclassified_Nitrososphaerota:96|Halobacteria:78|Methanomicrobia:33|Nitrososphaeria:31|Unclassified_Euryarchaeota:25|Thermoplasmata:23|Unclassified_Candidatus_Micrarchaeota:19|Candidatus_Poseidoniia:16|Unclassified_Archaea:13|Unclassified_Candidatus_Parvarchaeota:13|Methanobacteria:13|Archaeoglobi:11|Unclassified_Thermoproteota:11|Unclassified_Candidatus_Marsarchaeota:8|Unclassif…	Halobacteria:513|Thermoprotei:27|Archaeoglobi:11|Thermoplasmata:9|Unclassified_Archaea:3|Unclassified_Euryarchaeota:2|Nitrososphaeria:2|Unclassified_Candidatus_Heimdallarchaeota:1|Unclassified_Candidatus_Geoarchaeota:1|Unclassified_Candidatus_Geothermarchaeota:1|Unclassified_Candidatus_Thermoplasmatota:1	Halobacteria:12|Methanomicrobia:5|Unclassified_Euryarchaeota:4|Unclassified_Candidatus_Heimdallarchaeota:1
M00033|Ectoine_biosynthesis_aspartate_=>_ectoine	5	5	909	1978	42	27	22	K00928:352.37|K00133:218.23|K00836:447.70|K06718:90.57|K06720:90.50	Unclassified_Archaea:133|Unclassified_Euryarchaeota:111|Unclassified_Nitrososphaerota:87|Thermoprotei:78|Unclassified_Thermoproteota:56|Thermococci:52|Thermoplasmata:45|Unclassified_Candidatus_Micrarchaeota:44|Unclassified_Candidatus_Aenigmatarchaeota:40|Unclassified_Candidatus_Woesearchaeota:38|Halobacteria:30|Unclassified_Candidatus_Parvarchaeota:27|Unclassified_Candidatus_Bathyarchaeota:24|Can…	Halobacteria:628|Methanomicrobia:273|Thermoprotei:233|Methanobacteria:219|Unclassified_Nitrososphaerota:167|Unclassified_Archaea:60|Nitrososphaeria:46|Methanococci:45|Unclassified_Euryarchaeota:41|Thermoplasmata:39|Thermococci:34|Archaeoglobi:33|Unclassified_Thermoproteota:32|Unclassified_Candidatus_Bathyarchaeota:28|Unclassified_Candidatus_Altiarchaeota:14|Unclassified_Candidatus_Marsarchaeota:1…	Methanomicrobia:25|Unclassified_Euryarchaeota:6|Candidatus_Methanofastidiosa:4|Thermoplasmata:4|Unclassified_Candidatus_Altiarchaeota:1|Methanobacteria:1|Unclassified_Nitrososphaerota:1	Methanobacteria:17|Methanomicrobia:7|Unclassified_Nitrososphaerota:2|Candidatus_Methanoliparia:1	Methanomicrobia:9|Unclassified_Nitrososphaerota:7|Nitrososphaeria:3|Candidatus_Methanoliparia:2|Unclassified_Thermoproteota:1
M00123|Biotin_biosynthesis_pimeloyl-ACP/CoA_=>_biotin	6	4	2197	266	66	428	21	K00652:464.80|K00833,K19563,K19562:419.63,784.47,545.97|K01935,K19562:117.40,545.97|K01012:168.67	Halobacteria:337|Methanomicrobia:301|Thermoprotei:300|Unclassified_Archaea:182|Unclassified_Euryarchaeota:151|Unclassified_Nitrososphaerota:128|Methanobacteria:122|Thermococci:85|Thermoplasmata:84|Unclassified_Thermoproteota:71|Unclassified_Candidatus_Micrarchaeota:48|Unclassified_Candidatus_Bathyarchaeota:47|Unclassified_Candidatus_Aenigmatarchaeota:41|Unclassified_Candidatus_Woesearchaeota:39|A…	Methanobacteria:104|Halobacteria:73|Unclassified_Nitrososphaerota:16|Thermoprotei:11|Methanomicrobia:10|Unclassified_Thermoproteota:8|Nitrososphaeria:6|Unclassified_Archaea:6|Unclassified_Candidatus_Bathyarchaeota:5|Unclassified_Euryarchaeota:4|Thermoplasmata:4|Unclassified_Candidatus_Woesearchaeota:4|Unclassified_Candidatus_Geothermarchaeota:2|Unclassified_Candidatus_Korarchaeota:2|Methanopyri:2…	Halobacteria:23|Unclassified_Nitrososphaerota:18|Methanobacteria:8|Unclassified_Thermoproteota:7|Nitrososphaeria:6|Unclassified_Archaea:2|Methanococci:1|Unclassified_Euryarchaeota:1	Halobacteria:225|Unclassified_Nitrososphaerota:101|Methanococci:39|Nitrososphaeria:35|Methanomicrobia:11|Methanobacteria:8|Unclassified_Archaea:3|Unclassified_Thermoproteota:3|Unclassified_Euryarchaeota:2|Archaeoglobi:1	Methanobacteria:15|Methanococci:4|Unclassified_Nitrososphaerota:1|Methanomicrobia:1
M00150|Fumarate_reductase_prokaryotes	4	1	2855	95	4	3	21	K00244+K00245+K00246+K00247:688.90+294.07+55.07+38.67	Halobacteria:655|Methanomicrobia:323|Thermoprotei:285|Methanobacteria:257|Unclassified_Nitrososphaerota:229|Unclassified_Archaea:185|Unclassified_Euryarchaeota:152|Thermococci:86|Thermoplasmata:79|Unclassified_Thermoproteota:74|Unclassified_Candidatus_Bathyarchaeota:52|Nitrososphaeria:50|Unclassified_Candidatus_Micrarchaeota:49|Methanococci:45|Unclassified_Candidatus_Woesearchaeota:43|Unclassifie…	Unclassified_Nitrososphaerota:35|Thermoprotei:26|Thermoplasmata:9|Nitrososphaeria:7|Archaeoglobi:5|Halobacteria:3|Unclassified_Archaea:3|Unclassified_Thermoproteota:2|Unclassified_Candidatus_Geoarchaeota:2|Conexivisphaeria:1|Unclassified_Candidatus_Thermoplasmatota:1|Unclassified_Candidatus_Korarchaeota:1	Unclassified_Thermoproteota:2|Archaeoglobi:1|Unclassified_Candidatus_Geoarchaeota:1	Unclassified_Archaea:1|Unclassified_Thermoproteota:1|Unclassified_Euryarchaeota:1	Unclassified_Thermoproteota:10|Unclassified_Euryarchaeota:5|Unclassified_Archaea:4|Unclassified_Candidatus_Geoarchaeota:2
M00579|Phosphate_acetyltransferase-acetate_kinase_pathway_acetyl-CoA_=>_acetate	4	2	2826	0	131	0	21	K00625,K13788,K15024:378.60,568.80,265.27|K00925:134.27	Halobacteria:656|Thermoprotei:308|Unclassified_Nitrososphaerota:263|Methanobacteria:257|Methanomicrobia:215|Unclassified_Archaea:182|Unclassified_Euryarchaeota:155|Unclassified_Thermoproteota:89|Thermoplasmata:88|Thermococci:86|Nitrososphaeria:57|Unclassified_Candidatus_Micrarchaeota:49|Unclassified_Candidatus_Bathyarchaeota:47|Methanococci:45|Unclassified_Candidatus_Aenigmatarchaeota:41|Archaeog…	-	Methanomicrobia:94|Unclassified_Candidatus_Woesearchaeota:12|Unclassified_Archaea:8|Unclassified_Candidatus_Bathyarchaeota:4|Unclassified_Candidatus_Parvarchaeota:4|Thermoprotei:3|Halobacteria:2|Unclassified_Euryarchaeota:2|Unclassified_Candidatus_Heimdallarchaeota:1|Candidatus_Bathyarchaeia:1	-	Methanomicrobia:14|Unclassified_Archaea:3|Unclassified_Candidatus_Woesearchaeota:1|Unclassified_Euryarchaeota:1|Unclassified_Candidatus_Bathyarchaeota:1|Unclassified_Nitrososphaerota:1
M00577|Biotin_biosynthesis_BioW_pathway_pimelate_=>_pimeloyl-CoA_=>_biotin	6	5	2196	327	375	62	18	K01906:157.73|K00652:464.80|K00833,K19563:419.63,784.47|K01935:117.40|K01012:168.67	Halobacteria:337|Methanomicrobia:301|Thermoprotei:300|Unclassified_Archaea:182|Unclassified_Euryarchaeota:151|Unclassified_Nitrososphaerota:128|Methanobacteria:121|Thermococci:85|Thermoplasmata:84|Unclassified_Thermoproteota:71|Unclassified_Candidatus_Micrarchaeota:48|Unclassified_Candidatus_Bathyarchaeota:47|Unclassified_Candidatus_Aenigmatarchaeota:41|Unclassified_Candidatus_Woesearchaeota:39|A…	Methanobacteria:109|Halobacteria:95|Unclassified_Nitrososphaerota:34|Unclassified_Thermoproteota:15|Nitrososphaeria:12|Thermoprotei:11|Methanomicrobia:10|Unclassified_Archaea:8|Unclassified_Euryarchaeota:5|Unclassified_Candidatus_Bathyarchaeota:5|Thermoplasmata:4|Unclassified_Candidatus_Woesearchaeota:4|Unclassified_Candidatus_Geothermarchaeota:2|Unclassified_Candidatus_Korarchaeota:2|Methanopyri…	Halobacteria:225|Unclassified_Nitrososphaerota:101|Nitrososphaeria:35|Methanobacteria:4|Unclassified_Thermoproteota:3|Unclassified_Euryarchaeota:2|Unclassified_Archaea:2|Archaeoglobi:1|Methanococci:1|Methanomicrobia:1	Methanococci:39|Methanobacteria:10|Methanomicrobia:10|Unclassified_Nitrososphaerota:1|Halobacteria:1|Unclassified_Archaea:1	Methanobacteria:13|Methanococci:4|Methanomicrobia:1
M00596|Dissimilatory_sulfate_reduction_sulfate_=>_H2S	10	4	2357	530	47	26	18	K00958:259.60|K00394+K00395:426.80+84.63|K11180+K11181:342.83+359.90|K27187+K27188+K27189+K27190+K27191:171.30+513.43+92.23+263.27+290.50	Halobacteria:636|Methanomicrobia:302|Methanobacteria:257|Unclassified_Archaea:172|Unclassified_Euryarchaeota:144|Unclassified_Nitrososphaerota:133|Thermoprotei:110|Unclassified_Thermoproteota:77|Thermoplasmata:70|Unclassified_Candidatus_Micrarchaeota:49|Unclassified_Candidatus_Bathyarchaeota:44|Unclassified_Candidatus_Woesearchaeota:42|Methanococci:38|Unclassified_Candidatus_Aenigmatarchaeota:37|…	Thermoprotei:164|Unclassified_Nitrososphaerota:126|Thermococci:51|Nitrososphaeria:42|Halobacteria:22|Methanomicrobia:21|Unclassified_Archaea:15|Thermoplasmata:14|Unclassified_Euryarchaeota:13|Unclassified_Thermoproteota:11|Archaeoglobi:8|Unclassified_Candidatus_Bathyarchaeota:8|Methanococci:5|Unclassified_Candidatus_Aenigmatarchaeota:4|Unclassified_Candidatus_Thermoplasmatota:4|Unclassified_Candi…	Thermoprotei:18|Unclassified_Candidatus_Marsarchaeota:9|Unclassified_Archaea:6|Thermoplasmata:4|Archaeoglobi:4|Unclassified_Nitrososphaerota:4|Methanococci:2	Thermoprotei:19|Archaeoglobi:3|Unclassified_Nitrososphaerota:1|Candidatus_Hydrothermarchaeia:1|Unclassified_Euryarchaeota:1|Unclassified_Thermoproteota:1	Archaeoglobi:18
M00883|Lipoic_acid_biosynthesis_animals_and_bacteria_octanoyl-ACP_=>_dihydrolipoyl-H_=>_dihydrolipoyl-E2	5	3	1997	403	562	0	16	K23735,K23734:270.37,217.87|K03644:131.40|K10105,K16869:329.90,112.90	Methanomicrobia:311|Methanobacteria:257|Unclassified_Nitrososphaerota:241|Thermoprotei:186|Unclassified_Archaea:168|Unclassified_Euryarchaeota:124|Thermococci:85|Unclassified_Thermoproteota:75|Nitrososphaeria:50|Methanococci:45|Thermoplasmata:45|Unclassified_Candidatus_Micrarchaeota:42|Unclassified_Candidatus_Bathyarchaeota:41|Unclassified_Candidatus_Aenigmatarchaeota:41|Halobacteria:40|Archaeogl…	Thermoprotei:120|Halobacteria:74|Thermoplasmata:35|Unclassified_Euryarchaeota:33|Unclassified_Archaea:20|Unclassified_Nitrososphaerota:20|Candidatus_Poseidoniia:18|Unclassified_Thermoproteota:14|Unclassified_Candidatus_Marsarchaeota:12|Methanomicrobia:11|Unclassified_Candidatus_Bathyarchaeota:10|Unclassified_Candidatus_Woesearchaeota:5|Unclassified_Candidatus_Heimdallarchaeota:4|Unclassified_Cand…	Halobacteria:528|Thermoplasmata:8|Unclassified_Archaea:5|Thermoprotei:5|Nitrososphaeria:4|Unclassified_Candidatus_Micrarchaeota:3|Unclassified_Candidatus_Woesearchaeota:3|Unclassified_Nitrososphaerota:3|Unclassified_Candidatus_Bathyarchaeota:1|Unclassified_Euryarchaeota:1|Methanomicrobia:1	-	Halobacteria:16
M00345|Formaldehyde_assimilation_ribulose_monophosphate_pathway	8	4	1415	385	1006	157	15	K08093,K13812,K13831:169.87,352.77,309.07|K08094,K13831:102.50,309.07|K00850,K16370,K21071:351.60,317.20,354.00|K01624:96.33	Halobacteria:519|Unclassified_Nitrososphaerota:240|Unclassified_Archaea:140|Unclassified_Euryarchaeota:87|Unclassified_Thermoproteota:56|Nitrososphaeria:54|Thermoplasmata:40|Unclassified_Candidatus_Micrarchaeota:38|Unclassified_Candidatus_Aenigmatarchaeota:38|Unclassified_Candidatus_Woesearchaeota:30|Unclassified_Candidatus_Parvarchaeota:26|Candidatus_Poseidoniia:23|Unclassified_Nanoarchaeota:17|…	Halobacteria:138|Thermoprotei:37|Unclassified_Archaea:35|Unclassified_Euryarchaeota:30|Methanobacteria:25|Unclassified_Nitrososphaerota:18|Unclassified_Thermoproteota:18|Unclassified_Candidatus_Bathyarchaeota:17|Unclassified_Candidatus_Woesearchaeota:11|Unclassified_Candidatus_Micrarchaeota:8|Methanomicrobia:6|Unclassified_Candidatus_Verstraetearchaeota:6|Thermoplasmata:5|Unclassified_Candidatus_…	Thermoprotei:232|Methanomicrobia:215|Methanobacteria:215|Thermococci:83|Methanococci:39|Unclassified_Euryarchaeota:36|Archaeoglobi:33|Thermoplasmata:31|Unclassified_Candidatus_Bathyarchaeota:23|Unclassified_Thermoproteota:15|Unclassified_Archaea:15|Unclassified_Candidatus_Altiarchaeota:11|Candidatus_Methanofastidiosa:8|Unclassified_Nitrososphaerota:5|Unclassified_Candidatus_Korarchaeota:5|Candida…	Methanomicrobia:83|Thermoprotei:28|Methanobacteria:17|Thermoplasmata:11|Unclassified_Euryarchaeota:5|Unclassified_Candidatus_Altiarchaeota:4|Unclassified_Archaea:3|Unclassified_Candidatus_Lokiarchaeota:2|Unclassified_Candidatus_Bathyarchaeota:2|Unclassified_Nitrososphaerota:1|Hadesarchaea:1	Methanomicrobia:10|Unclassified_Candidatus_Bathyarchaeota:2|Thermoplasmata:1|Unclassified_Candidatus_Lokiarchaeota:1|Unclassified_Candidatus_Heimdallarchaeota:1
M00140|C1-unit_interconversion_prokaryotes	5	4	595	1184	114	1075	10	K00600:83.83|K01491,K00300:410.60,354.87|K01491,K01500:410.60,203.97|K01938:879.67	Unclassified_Archaea:105|Unclassified_Euryarchaeota:69|Unclassified_Nitrososphaerota:67|Unclassified_Thermoproteota:42|Methanococci:35|Thermoprotei:31|Unclassified_Candidatus_Micrarchaeota:28|Unclassified_Candidatus_Woesearchaeota:26|Unclassified_Candidatus_Aenigmatarchaeota:25|Thermoplasmata:23|Unclassified_Candidatus_Parvarchaeota:22|Methanomicrobia:21|Unclassified_Candidatus_Bathyarchaeota:21|…	Thermoprotei:279|Methanobacteria:253|Unclassified_Nitrososphaerota:93|Thermococci:86|Unclassified_Archaea:69|Halobacteria:36|Unclassified_Thermoproteota:35|Thermoplasmata:33|Archaeoglobi:32|Unclassified_Euryarchaeota:30|Unclassified_Candidatus_Bathyarchaeota:30|Methanomicrobia:29|Unclassified_Candidatus_Micrarchaeota:21|Nitrososphaeria:18|Unclassified_Candidatus_Aenigmatarchaeota:15|Unclassified_…	Unclassified_Nitrososphaerota:29|Unclassified_Euryarchaeota:25|Thermoplasmata:14|Methanomicrobia:13|Halobacteria:12|Nitrososphaeria:4|Candidatus_Poseidoniia:4|Unclassified_Archaea:4|Unclassified_Candidatus_Heimdallarchaeota:2|Unclassified_Candidatus_Thorarchaeota:1|Thermoprotei:1|Unclassified_Candidatus_Parvarchaeota:1|Candidatus_Methanofastidiosa:1|Unclassified_Candidatus_Bathyarchaeota:1|Candid…	Halobacteria:600|Methanomicrobia:259|Unclassified_Nitrososphaerota:75|Unclassified_Euryarchaeota:28|Nitrososphaeria:27|Thermoplasmata:16|Unclassified_Archaea:15|Unclassified_Thermoproteota:12|Unclassified_Candidatus_Altiarchaeota:10|Candidatus_Poseidoniia:10|Candidatus_Methanofastidiosa:6|Unclassified_Candidatus_Woesearchaeota:6|Unclassified_Candidatus_Diapherotrites:4|Unclassified_Candidatus_Lok…	Unclassified_Euryarchaeota:6|Thermoplasmata:2|Methanomicrobia:1|Halobacteria:1
M00022|Shikimate_pathway_phosphoenolpyruvate_+_erythrose-4P_=>_chorismate	14	7	761	1262	916	32	7	K01626,K03856,K13853:154.43,450.47,462.80|K01735,K13829,K13830:307.47,533.13,952.27|K03785,K03786,K13832,K13830:185.43,186.37,358.50,952.27|K00014,K13832,K13830:275.37,358.50,952.27|K00891,K13829,K13830:126.63,533.13,952.27|K00800,K24018,K13830:143.20,754.87,952.27|K01736:284.77	Unclassified_Archaea:132|Unclassified_Euryarchaeota:76|Thermoprotei:65|Unclassified_Nitrososphaerota:65|Thermococci:59|Unclassified_Thermoproteota:48|Unclassified_Candidatus_Aenigmatarchaeota:39|Unclassified_Candidatus_Micrarchaeota:37|Thermoplasmata:36|Unclassified_Candidatus_Woesearchaeota:35|Unclassified_Candidatus_Parvarchaeota:26|Unclassified_Candidatus_Bathyarchaeota:20|Unclassified_Nanoarc…	Halobacteria:436|Unclassified_Nitrososphaerota:199|Methanomicrobia:107|Unclassified_Euryarchaeota:76|Methanobacteria:72|Thermoprotei:65|Nitrososphaeria:44|Unclassified_Archaea:43|Thermoplasmata:43|Unclassified_Thermoproteota:29|Archaeoglobi:28|Unclassified_Candidatus_Bathyarchaeota:21|Candidatus_Poseidoniia:19|Unclassified_Candidatus_Marsarchaeota:12|Unclassified_Candidatus_Micrarchaeota:11|Uncla…	Halobacteria:215|Methanomicrobia:208|Methanobacteria:185|Thermoprotei:181|Methanococci:38|Unclassified_Archaea:14|Unclassified_Thermoproteota:10|Thermococci:10|Thermoplasmata:9|Unclassified_Candidatus_Bathyarchaeota:8|Unclassified_Candidatus_Altiarchaeota:7|Unclassified_Euryarchaeota:6|Hadesarchaea:4|Candidatus_Methanomethylicia:3|Unclassified_Candidatus_Geothermarchaeota:2|Unclassified_Candidatu…	Thermococci:17|Unclassified_Archaea:4|Unclassified_Candidatus_Bathyarchaeota:3|Unclassified_Candidatus_Lokiarchaeota:2|Unclassified_Thermoproteota:2|Methanomicrobia:2|Unclassified_Candidatus_Woesearchaeota:1|Candidatus_Methanofastidiosa:1	Candidatus_Methanofastidiosa:7
M00617|Methanogen	4	1	602	618	682	1071	5	M00567,M00357,M00356,M00563:-,-,-,-	Unclassified_Archaea:104|Unclassified_Nitrososphaerota:78|Thermococci:58|Thermoprotei:56|Unclassified_Candidatus_Micrarchaeota:48|Unclassified_Euryarchaeota:48|Unclassified_Thermoproteota:42|Unclassified_Candidatus_Aenigmatarchaeota:29|Unclassified_Candidatus_Parvarchaeota:23|Unclassified_Candidatus_Woesearchaeota:22|Unclassified_Nanoarchaeota:16|Thermoplasmata:13|Unclassified_Candidatus_Diaphero…	Unclassified_Nitrososphaerota:160|Halobacteria:87|Thermoprotei:68|Unclassified_Euryarchaeota:51|Unclassified_Archaea:43|Nitrososphaeria:41|Unclassified_Thermoproteota:33|Thermococci:27|Thermoplasmata:22|Unclassified_Candidatus_Woesearchaeota:19|Candidatus_Poseidoniia:15|Unclassified_Candidatus_Aenigmatarchaeota:12|Unclassified_Candidatus_Marsarchaeota:8|Unclassified_Candidatus_Bathyarchaeota:6|Me…	Halobacteria:565|Thermoprotei:37|Unclassified_Nitrososphaerota:18|Unclassified_Archaea:15|Unclassified_Euryarchaeota:10|Nitrososphaeria:7|Unclassified_Candidatus_Bathyarchaeota:5|Thermoplasmata:4|Unclassified_Candidatus_Altiarchaeota:4|Unclassified_Candidatus_Thermoplasmatota:3|Unclassified_Thermoproteota:3|Unclassified_Candidatus_Heimdallarchaeota:2|Unclassified_Candidatus_Korarchaeota:2|Conexiv…	Methanomicrobia:316|Methanobacteria:255|Thermoprotei:150|Thermoplasmata:49|Unclassified_Euryarchaeota:48|Methanococci:45|Unclassified_Candidatus_Bathyarchaeota:40|Archaeoglobi:37|Unclassified_Archaea:31|Unclassified_Thermoproteota:11|Unclassified_Candidatus_Altiarchaeota:9|Candidatus_Methanofastidiosa:8|Unclassified_Nitrososphaerota:7|Unclassified_Candidatus_Lokiarchaeota:7|Unclassified_Candidatu…	Unclassified_Candidatus_Bathyarchaeota:1|Unclassified_Euryarchaeota:1|Methanomicrobia:1|Unclassified_Candidatus_Heimdallarchaeota:1|Unclassified_Nitrososphaerota:1
M00526|Lysine_biosynthesis_DAP_dehydrogenase_pathway_aspartate_=>_lysine	9	6	722	867	985	400	4	K00928,K12524,K12525,K12526:352.37,750.40,770.90,465.37|K00133:218.23|K01714:258.37|K00215:136.13|K03340:191.27|K01586,K12526:305.00,465.37	Unclassified_Archaea:121|Unclassified_Euryarchaeota:104|Unclassified_Nitrososphaerota:84|Thermoprotei:53|Thermoplasmata:45|Unclassified_Candidatus_Aenigmatarchaeota:40|Unclassified_Thermoproteota:40|Unclassified_Candidatus_Micrarchaeota:39|Unclassified_Candidatus_Woesearchaeota:35|Unclassified_Candidatus_Parvarchaeota:27|Thermococci:25|Candidatus_Poseidoniia:23|Unclassified_Nanoarchaeota:16|Uncla…	Thermoprotei:258|Unclassified_Nitrososphaerota:174|Unclassified_Archaea:62|Thermococci:61|Halobacteria:46|Nitrososphaeria:45|Unclassified_Thermoproteota:40|Unclassified_Euryarchaeota:30|Unclassified_Candidatus_Bathyarchaeota:25|Thermoplasmata:19|Methanomicrobia:13|Methanobacteria:11|Unclassified_Candidatus_Marsarchaeota:9|Candidatus_Methanofastidiosa:8|Unclassified_Candidatus_Verstraetearchaeota:…	Halobacteria:607|Methanobacteria:241|Methanomicrobia:46|Unclassified_Candidatus_Bathyarchaeota:13|Unclassified_Euryarchaeota:13|Unclassified_Candidatus_Altiarchaeota:6|Thermoplasmata:6|Unclassified_Nitrososphaerota:6|Archaeoglobi:5|Unclassified_Candidatus_Micrarchaeota:5|Unclassified_Archaea:5|Unclassified_Thermoproteota:4|Nitrososphaeria:4|Unclassified_Candidatus_Woesearchaeota:3|Unclassified_Ca…	Methanomicrobia:260|Methanococci:44|Archaeoglobi:25|Thermoplasmata:18|Unclassified_Euryarchaeota:11|Unclassified_Candidatus_Altiarchaeota:9|Unclassified_Archaea:5|Methanobacteria:5|Unclassified_Thermoproteota:5|Candidatus_Methanoliparia:3|Methanopyri:3|Unclassified_Candidatus_Bathyarchaeota:2|Methanonatronarchaeia:2|Unclassified_Candidatus_Geoarchaeota:2|Hadesarchaea:2|Unclassified_Candidatus_Dia…	Methanomicrobia:2|Hadesarchaea:1|Methanococci:1
M00169|CAM_(Crassulacean_acid_metabolism)_light	2	2	1755	0	1219	0	4	K00029:306.00|K01006:374.83	Thermoprotei:239|Methanobacteria:228|Unclassified_Archaea:159|Methanomicrobia:146|Unclassified_Euryarchaeota:138|Unclassified_Nitrososphaerota:126|Thermococci:85|Halobacteria:73|Thermoplasmata:60|Unclassified_Thermoproteota:49|Unclassified_Candidatus_Bathyarchaeota:48|Methanococci:45|Unclassified_Candidatus_Aenigmatarchaeota:41|Unclassified_Candidatus_Micrarchaeota:39|Archaeoglobi:37|Unclassified…	-	Halobacteria:585|Methanomicrobia:177|Unclassified_Nitrososphaerota:137|Thermoprotei:72|Unclassified_Thermoproteota:40|Nitrososphaeria:35|Unclassified_Archaea:34|Methanobacteria:29|Thermoplasmata:26|Unclassified_Euryarchaeota:20|Unclassified_Candidatus_Woesearchaeota:12|Unclassified_Candidatus_Micrarchaeota:10|Unclassified_Candidatus_Thermoplasmatota:5|Unclassified_Candidatus_Korarchaeota:5|Unclas…	-	Thermoplasmata:2|Unclassified_Candidatus_Woesearchaeota:1|Unclassified_Nitrososphaerota:1
M00930|Menaquinone_biosynthesis_futalosine_pathway	7	6	2530	244	188	13	3	K11782:124.10|K18285:443.13|K18286,K20810:371.83,308.77|K11783:109.97|K11784:438.10|K11785:254.10	Halobacteria:655|Methanomicrobia:293|Methanobacteria:257|Thermoprotei:253|Unclassified_Archaea:183|Unclassified_Euryarchaeota:114|Unclassified_Nitrososphaerota:101|Thermococci:86|Unclassified_Thermoproteota:76|Thermoplasmata:67|Unclassified_Candidatus_Bathyarchaeota:51|Unclassified_Candidatus_Micrarchaeota:49|Methanococci:45|Unclassified_Candidatus_Woesearchaeota:43|Unclassified_Candidatus_Aenigm…	Unclassified_Nitrososphaerota:81|Thermoprotei:58|Unclassified_Euryarchaeota:24|Thermoplasmata:21|Nitrososphaeria:15|Unclassified_Thermoproteota:11|Methanomicrobia:9|Candidatus_Poseidoniia:8|Unclassified_Archaea:6|Archaeoglobi:4|Unclassified_Candidatus_Altiarchaeota:4|Unclassified_Candidatus_Bathyarchaeota:1|Unclassified_Candidatus_Thermoplasmatota:1|Unclassified_Candidatus_Thorarchaeota:1	Unclassified_Nitrososphaerota:82|Nitrososphaeria:30|Archaeoglobi:25|Unclassified_Euryarchaeota:20|Candidatus_Poseidoniia:9|Methanomicrobia:8|Unclassified_Candidatus_Altiarchaeota:6|Unclassified_Archaea:3|Unclassified_Thermoproteota:2|Conexivisphaeria:1|Candidatus_Hydrothermarchaeia:1|Halobacteria:1	Methanomicrobia:10|Halobacteria:2|Unclassified_Archaea:1	Methanomicrobia:3
M00530|Dissimilatory_nitrate_reduction_nitrate_=>_ammonia	9	2	2755	179	40	1	3	K00370+K00371+K00374,K02567+K02568:821.20+381.67+166.57,719.30+33.17|K00362+K00363,K03385+K15876:1252.47+144.13,256.90+130.50	Halobacteria:512|Methanomicrobia:314|Thermoprotei:262|Unclassified_Nitrososphaerota:259|Methanobacteria:257|Unclassified_Archaea:190|Unclassified_Euryarchaeota:158|Unclassified_Thermoproteota:88|Thermoplasmata:86|Thermococci:86|Nitrososphaeria:57|Unclassified_Candidatus_Bathyarchaeota:52|Unclassified_Candidatus_Micrarchaeota:49|Methanococci:45|Unclassified_Candidatus_Woesearchaeota:43|Unclassifie…	Halobacteria:146|Thermoprotei:24|Unclassified_Nitrososphaerota:3|Unclassified_Archaea:2|Candidatus_Hydrothermarchaeia:1|Candidatus_Poseidoniia:1|Unclassified_Thermoproteota:1|Methanomicrobia:1	Thermoprotei:25|Methanomicrobia:5|Archaeoglobi:3|Thermoplasmata:2|Unclassified_Nitrososphaerota:2|Unclassified_Candidatus_Heimdallarchaeota:2|Unclassified_Archaea:1	Unclassified_Candidatus_Hydrothermarchaeota:1	Methanomicrobia:3
M00970|Proline_degradation_proline_=>_glutamate	3	2	2506	0	469	0	3	K00318,K13821:185.00,621.00|K00294,K13821:482.73,621.00	Methanomicrobia:322|Thermoprotei:307|Unclassified_Nitrososphaerota:263|Methanobacteria:257|Halobacteria:241|Unclassified_Archaea:191|Unclassified_Euryarchaeota:142|Unclassified_Thermoproteota:89|Thermococci:81|Thermoplasmata:80|Nitrososphaeria:57|Unclassified_Candidatus_Bathyarchaeota:52|Unclassified_Candidatus_Micrarchaeota:49|Methanococci:45|Unclassified_Candidatus_Woesearchaeota:41|Unclassifie…	-	Halobacteria:417|Unclassified_Euryarchaeota:15|Candidatus_Poseidoniia:12|Thermoplasmata:7|Thermococci:5|Thermoprotei:4|Unclassified_Candidatus_Thermoplasmatota:2|Unclassified_Candidatus_Woesearchaeota:2|Unclassified_Archaea:2|Methanomicrobia:1|Unclassified_Candidatus_Heimdallarchaeota:1|Unclassified_Candidatus_Lokiarchaeota:1	-	Unclassified_Euryarchaeota:1|Thermoplasmata:1|Unclassified_Nitrososphaerota:1
M00632|Galactose_degradation_Leloir_pathway_galactose_=>_alpha-D-glucose-1P	4	4	886	1614	420	56	2	K01785:47.53|K00849:371.37|K00965:116.17|K01784:261.73	Halobacteria:145|Unclassified_Euryarchaeota:110|Unclassified_Archaea:104|Unclassified_Nitrososphaerota:85|Methanomicrobia:56|Thermoplasmata:49|Thermoprotei:46|Unclassified_Thermoproteota:36|Unclassified_Candidatus_Aenigmatarchaeota:30|Unclassified_Candidatus_Micrarchaeota:23|Candidatus_Poseidoniia:22|Archaeoglobi:21|Unclassified_Candidatus_Bathyarchaeota:20|Unclassified_Candidatus_Woesearchaeota:…	Halobacteria:464|Methanobacteria:250|Thermoprotei:183|Methanomicrobia:126|Unclassified_Nitrososphaerota:118|Unclassified_Archaea:66|Unclassified_Thermoproteota:44|Thermococci:44|Methanococci:43|Unclassified_Euryarchaeota:41|Thermoplasmata:35|Nitrososphaeria:30|Unclassified_Candidatus_Bathyarchaeota:20|Unclassified_Candidatus_Micrarchaeota:19|Unclassified_Candidatus_Woesearchaeota:18|Unclassified_…	Methanomicrobia:141|Thermoprotei:66|Unclassified_Nitrososphaerota:61|Halobacteria:43|Unclassified_Archaea:23|Nitrososphaeria:13|Unclassified_Candidatus_Bathyarchaeota:12|Unclassified_Thermoproteota:9|Unclassified_Candidatus_Woesearchaeota:8|Unclassified_Candidatus_Micrarchaeota:7|Unclassified_Candidatus_Marsarchaeota:7|Unclassified_Euryarchaeota:7|Thermococci:7|Unclassified_Candidatus_Altiarchaeo…	Thermococci:32|Thermoprotei:16|Halobacteria:6|Unclassified_Candidatus_Lokiarchaeota:1|Thermoplasmata:1	Unclassified_Candidatus_Altiarchaeota:1|Unclassified_Candidatus_Lokiarchaeota:1
M00063|CMP-KDO_biosynthesis	4	4	2896	69	2	9	2	K06041:163.20|K01627:179.73|K03270:163.10|K00979:118.07	Halobacteria:641|Methanomicrobia:316|Thermoprotei:311|Methanobacteria:257|Unclassified_Nitrososphaerota:236|Unclassified_Archaea:188|Unclassified_Euryarchaeota:151|Unclassified_Thermoproteota:88|Thermoplasmata:86|Thermococci:86|Unclassified_Candidatus_Bathyarchaeota:51|Nitrososphaeria:50|Unclassified_Candidatus_Micrarchaeota:49|Methanococci:45|Unclassified_Candidatus_Woesearchaeota:42|Unclassifie…	Unclassified_Nitrososphaerota:28|Halobacteria:10|Nitrososphaeria:7|Unclassified_Archaea:5|Unclassified_Euryarchaeota:5|Methanomicrobia:4|Unclassified_Candidatus_Lokiarchaeota:2|Unclassified_Candidatus_Parvarchaeota:2|Unclassified_Candidatus_Bathyarchaeota:1|Unclassified_Thermoproteota:1|Unclassified_Candidatus_Woesearchaeota:1|Hadesarchaea:1|Unclassified_Candidatus_Altiarchaeota:1|Thermoplasmata:1	Methanomicrobia:1|Unclassified_Euryarchaeota:1	Halobacteria:7|Thermoplasmata:1|Unclassified_Euryarchaeota:1	Methanomicrobia:2
M00157|F-type_ATPase_prokaryotes_and_chloroplasts	8	1	2925	12	37	2	2	K02111+K02112+K02113+K02114+K02115+K02108+K02109+K02110:420.50+483.83+103.23+95.13+250.23+159.80+73.23+67.07	Halobacteria:657|Thermoprotei:309|Methanomicrobia:284|Unclassified_Nitrososphaerota:263|Methanobacteria:257|Unclassified_Archaea:193|Unclassified_Euryarchaeota:155|Unclassified_Thermoproteota:89|Thermoplasmata:88|Thermococci:86|Nitrososphaeria:55|Unclassified_Candidatus_Bathyarchaeota:51|Unclassified_Candidatus_Micrarchaeota:49|Methanococci:45|Unclassified_Candidatus_Woesearchaeota:42|Unclassifie…	Methanomicrobia:3|Nitrososphaeria:2|Thermoprotei:2|Unclassified_Candidatus_Woesearchaeota:1|Unclassified_Euryarchaeota:1|Unclassified_Candidatus_Hydrothermarchaeota:1|Hadesarchaea:1|Unclassified_Nitrososphaerota:1	Methanomicrobia:36|Unclassified_Euryarchaeota:1	Unclassified_Candidatus_Altiarchaeota:1|Halobacteria:1	Unclassified_Euryarchaeota:1|Unclassified_Candidatus_Bathyarchaeota:1
M00134|Polyamine_biosynthesis_arginine_=>_ornithine_=>_putrescine	2	2	2236	0	740	0	2	K01476:188.63|K01581:218.90	Thermoprotei:311|Unclassified_Nitrososphaerota:262|Methanobacteria:256|Unclassified_Archaea:188|Methanomicrobia:183|Unclassified_Euryarchaeota:157|Unclassified_Thermoproteota:88|Thermoplasmata:87|Thermococci:86|Halobacteria:77|Nitrososphaeria:54|Unclassified_Candidatus_Bathyarchaeota:51|Unclassified_Candidatus_Micrarchaeota:49|Methanococci:45|Unclassified_Candidatus_Aenigmatarchaeota:41|Unclassif…	-	Halobacteria:581|Methanomicrobia:138|Unclassified_Archaea:5|Unclassified_Candidatus_Woesearchaeota:4|Nitrososphaeria:3|Unclassified_Nitrososphaerota:2|Unclassified_Candidatus_Heimdallarchaeota:2|Unclassified_Euryarchaeota:1|Unclassified_Candidatus_Bathyarchaeota:1|Methanobacteria:1|Unclassified_Thermoproteota:1|Thermoplasmata:1	-	Methanomicrobia:2
M00093|Phosphatidylethanolamine_(PE)_biosynthesis_PA_=>_PS_=>_PE	4	3	2019	845	112	0	2	K00981:52.17|K00998,K17103:427.07,129.10|K01613:24.13	Thermoprotei:311|Unclassified_Nitrososphaerota:262|Methanobacteria:188|Unclassified_Archaea:181|Halobacteria:146|Unclassified_Euryarchaeota:130|Methanomicrobia:112|Unclassified_Thermoproteota:89|Thermococci:85|Thermoplasmata:67|Nitrososphaeria:57|Unclassified_Candidatus_Bathyarchaeota:52|Unclassified_Candidatus_Micrarchaeota:39|Unclassified_Candidatus_Aenigmatarchaeota:39|Unclassified_Candidatus_…	Halobacteria:511|Methanomicrobia:188|Methanobacteria:69|Methanococci:16|Thermoplasmata:12|Unclassified_Candidatus_Micrarchaeota:10|Unclassified_Euryarchaeota:10|Unclassified_Archaea:9|Unclassified_Candidatus_Woesearchaeota:4|Archaeoglobi:4|Candidatus_Methanofastidiosa:3|Unclassified_Candidatus_Heimdallarchaeota:3|Unclassified_Nitrososphaerota:2|Unclassified_Candidatus_Aenigmatarchaeota:1|Methanon…	Archaeoglobi:26|Methanomicrobia:23|Unclassified_Euryarchaeota:16|Thermoplasmata:9|Methanococci:8|Unclassified_Candidatus_Woesearchaeota:5|Candidatus_Methanofastidiosa:5|Unclassified_Candidatus_Lokiarchaeota:3|Unclassified_Archaea:3|Methanopyri:3|Unclassified_Candidatus_Heimdallarchaeota:2|Methanonatronarchaeia:2|Theionarchaea:2|Candidatus_Poseidoniia:1|Halobacteria:1|Thermococci:1|Unclassified_Ca…	-	Unclassified_Euryarchaeota:2
M00549|Nucleotide_sugar_biosynthesis_glucose_=>_UDP-glucose	10	3	2233	684	59	0	2	K00844,K00845,K25026,K12407,K00886:103.40,116.37,270.83,758.20,146.57|K01835,K15779,K15778:368.63,1002.87,482.37|K00963,K12447:77.70,380.43	Halobacteria:624|Thermoprotei:256|Unclassified_Nitrososphaerota:248|Methanomicrobia:244|Unclassified_Archaea:151|Unclassified_Euryarchaeota:120|Unclassified_Thermoproteota:71|Nitrososphaeria:56|Thermoplasmata:47|Unclassified_Candidatus_Micrarchaeota:42|Archaeoglobi:38|Thermococci:34|Methanococci:30|Unclassified_Candidatus_Bathyarchaeota:29|Unclassified_Candidatus_Parvarchaeota:27|Unclassified_Can…	Methanobacteria:221|Methanomicrobia:73|Thermoprotei:55|Thermoplasmata:41|Unclassified_Archaea:37|Unclassified_Euryarchaeota:36|Thermococci:35|Halobacteria:34|Unclassified_Candidatus_Aenigmatarchaeota:18|Unclassified_Thermoproteota:17|Unclassified_Candidatus_Bathyarchaeota:16|Methanococci:15|Unclassified_Candidatus_Woesearchaeota:13|Unclassified_Nitrososphaerota:13|Candidatus_Poseidoniia:12|Unclas…	Thermococci:17|Methanobacteria:12|Unclassified_Candidatus_Bathyarchaeota:7|Methanomicrobia:5|Unclassified_Archaea:5|Unclassified_Candidatus_Woesearchaeota:4|Unclassified_Nitrososphaerota:3|Unclassified_Euryarchaeota:2|Conexivisphaeria:1|Unclassified_Thermoproteota:1|Unclassified_Candidatus_Altiarchaeota:1|Unclassified_Candidatus_Aenigmatarchaeota:1	-	Methanomicrobia:1|Unclassified_Candidatus_Diapherotrites:1
M00849|C5_isoprenoid_biosynthesis_mevalonate_pathway_archaea	15	8	293	571	652	1461	1	K00626:489.07|K01641:159.53|K00021,K00054:205.50,301.87|K00869,K18689:154.27,325.60|K17942,K25517+K09128,K18690:395.30,343.07+113.00,259.80|K17942,K25518+K03186,K22813:395.30,480.17+148.63,428.50|K06981:105.90|K01823:45.03	Unclassified_Archaea:95|Unclassified_Euryarchaeota:35|Unclassified_Candidatus_Woesearchaeota:32|Unclassified_Candidatus_Parvarchaeota:22|Unclassified_Nitrososphaerota:21|Unclassified_Nanoarchaeota:15|Unclassified_Candidatus_Aenigmatarchaeota:12|Unclassified_Thermoproteota:10|Nanohaloarchaea:6|Thermoprotei:5|Candidatus_Nanohaloarchaea:5|Thermoplasmata:5|Unclassified_Candidatus_Diapherotrites:5|Can…	Thermoprotei:116|Unclassified_Nitrososphaerota:91|Unclassified_Euryarchaeota:65|Unclassified_Archaea:52|Unclassified_Thermoproteota:37|Unclassified_Candidatus_Micrarchaeota:24|Methanomicrobia:23|Unclassified_Candidatus_Aenigmatarchaeota:22|Unclassified_Candidatus_Bathyarchaeota:19|Halobacteria:17|Thermoplasmata:15|Nitrososphaeria:14|Unclassified_Candidatus_Woesearchaeota:11|Unclassified_Candidatu…	Thermoprotei:153|Methanobacteria:89|Unclassified_Nitrososphaerota:68|Methanomicrobia:50|Halobacteria:41|Unclassified_Archaea:35|Unclassified_Euryarchaeota:34|Unclassified_Thermoproteota:29|Thermoplasmata:28|Unclassified_Candidatus_Micrarchaeota:19|Unclassified_Candidatus_Bathyarchaeota:19|Candidatus_Poseidoniia:15|Nitrososphaeria:10|Unclassified_Candidatus_Aenigmatarchaeota:7|Unclassified_Candida…	Halobacteria:599|Methanomicrobia:248|Methanobacteria:163|Unclassified_Nitrososphaerota:84|Thermococci:81|Methanococci:44|Thermoplasmata:40|Thermoprotei:37|Nitrososphaeria:32|Archaeoglobi:26|Unclassified_Euryarchaeota:24|Unclassified_Thermoproteota:13|Unclassified_Candidatus_Bathyarchaeota:12|Unclassified_Archaea:10|Unclassified_Candidatus_Marsarchaeota:6|Candidatus_Methanofastidiosa:4|Unclassifie…	Unclassified_Archaea:1
M00050|Guanine_ribonucleotide_biosynthesis_IMP_=>_GDPGTP	5	4	270	530	901	1276	1	K00088:374.63|K01951:101.60|K00942:186.43|K00940,K18533:143.63,278.87	Unclassified_Archaea:51|Unclassified_Nitrososphaerota:48|Unclassified_Euryarchaeota:38|Unclassified_Thermoproteota:27|Unclassified_Nanoarchaeota:13|Unclassified_Candidatus_Aenigmatarchaeota:12|Unclassified_Candidatus_Bathyarchaeota:11|Thermoprotei:11|Unclassified_Candidatus_Parvarchaeota:10|Methanomicrobia:8|Unclassified_Candidatus_Woesearchaeota:8|Thermoplasmata:6|Unclassified_Candidatus_Diapher…	Unclassified_Archaea:84|Unclassified_Euryarchaeota:64|Unclassified_Nitrososphaerota:62|Thermoprotei:59|Unclassified_Candidatus_Bathyarchaeota:30|Unclassified_Candidatus_Micrarchaeota:28|Unclassified_Thermoproteota:24|Methanomicrobia:22|Unclassified_Candidatus_Aenigmatarchaeota:20|Unclassified_Candidatus_Parvarchaeota:16|Halobacteria:14|Unclassified_Candidatus_Woesearchaeota:13|Thermoplasmata:11|A…	Thermoprotei:224|Methanomicrobia:211|Unclassified_Nitrososphaerota:51|Thermoplasmata:48|Unclassified_Euryarchaeota:47|Halobacteria:47|Unclassified_Archaea:40|Methanobacteria:29|Unclassified_Thermoproteota:28|Archaeoglobi:25|Unclassified_Candidatus_Woesearchaeota:21|Unclassified_Candidatus_Micrarchaeota:15|Nitrososphaeria:14|Candidatus_Poseidoniia:12|Unclassified_Candidatus_Altiarchaeota:10|Unclas…	Halobacteria:594|Methanobacteria:222|Unclassified_Nitrososphaerota:103|Methanomicrobia:82|Thermococci:82|Methanococci:45|Nitrososphaeria:32|Thermoplasmata:23|Unclassified_Archaea:18|Thermoprotei:17|Unclassified_Thermoproteota:10|Unclassified_Euryarchaeota:8|Candidatus_Poseidoniia:6|Unclassified_Candidatus_Marsarchaeota:5|Unclassified_Candidatus_Thermoplasmatota:4|Unclassified_Candidatus_Geotherma…	Unclassified_Euryarchaeota:1
M00924|Cobalamin_biosynthesis_anaerobic_uroporphyrinogen_III_=>_sirohydrochlorin_=>_cobyrinate_ac-diamide	23	13	980	666	474	857	1	K02302,K02303,K13542:429.43,253.10,402.40|K02302,K02304,K24866:429.43,173.87,159.07|K02190,K03795,K22011,K03794,K01772:139.47,121.23,123.27,138.33,89.67|K03394:124.83|K05934,K13541,K21479:354.03,519.00,555.17|K05936:234.60|K02189,K13541:63.20,519.00|K02188:127.73|K05895:163.87|K02191,K00595:197.23,217.87|K03399,K00595:182.43,217.87|K06042:96.07|K02224:161.07	Unclassified_Archaea:164|Unclassified_Euryarchaeota:122|Thermococci:86|Unclassified_Nitrososphaerota:71|Thermoprotei:55|Unclassified_Candidatus_Micrarchaeota:49|Unclassified_Candidatus_Bathyarchaeota:46|Unclassified_Thermoproteota:45|Unclassified_Candidatus_Woesearchaeota:43|Halobacteria:42|Unclassified_Candidatus_Aenigmatarchaeota:41|Thermoplasmata:40|Unclassified_Candidatus_Parvarchaeota:27|Can…	Halobacteria:266|Thermoprotei:94|Unclassified_Nitrososphaerota:79|Methanomicrobia:45|Unclassified_Thermoproteota:31|Thermoplasmata:23|Unclassified_Euryarchaeota:21|Archaeoglobi:17|Unclassified_Archaea:17|Nitrososphaeria:16|Candidatus_Methanofastidiosa:8|Unclassified_Candidatus_Marsarchaeota:7|Unclassified_Candidatus_Verstraetearchaeota:7|Methanobacteria:7|Candidatus_Methanomethylicia:5|Unclassifi…	Thermoprotei:147|Methanomicrobia:105|Methanobacteria:79|Unclassified_Nitrososphaerota:39|Halobacteria:35|Archaeoglobi:18|Unclassified_Archaea:10|Nitrososphaeria:9|Unclassified_Thermoproteota:6|Thermoplasmata:6|Unclassified_Euryarchaeota:6|Unclassified_Candidatus_Marsarchaeota:4|Methanonatronarchaeia:3|Candidatus_Methanoliparia:3|Unclassified_Candidatus_Bathyarchaeota:2|Methanococci:1|Methanopyri:1	Halobacteria:315|Methanobacteria:171|Methanomicrobia:170|Unclassified_Nitrososphaerota:75|Methanococci:44|Nitrososphaeria:30|Thermoplasmata:19|Thermoprotei:15|Unclassified_Euryarchaeota:9|Unclassified_Thermoproteota:7|Unclassified_Archaea:2	Candidatus_Hydrothermarchaeia:1
M00958|Adenine_ribonucleotide_degradation_AMP_=>_Urate	23	4	1289	103	1568	17	1	K01490,K01081,K19970,K11751,K03787,K02566,K08693:219.10,153.07,624.60,479.47,155.90,258.37,760.30|K01081,K19970,K03787,K18550,K01488,K19572,K05810:153.07,624.60,155.90,218.73,338.67,258.80,54.00|K03783,K03784,K09913,K05810:169.67,228.80,49.33,54.00|K00106,K00087+K13479+K13480,K13481+K13482,K11177+K11178+K13483:1591.80,846.30+311.47+244.00,456.70+1086.53,651.33+249.90+250.67	Unclassified_Nitrososphaerota:234|Unclassified_Archaea:157|Thermoprotei:150|Unclassified_Euryarchaeota:131|Unclassified_Thermoproteota:79|Thermoplasmata:74|Nitrososphaeria:57|Unclassified_Candidatus_Bathyarchaeota:46|Unclassified_Candidatus_Micrarchaeota:43|Unclassified_Candidatus_Aenigmatarchaeota:41|Unclassified_Candidatus_Woesearchaeota:39|Methanomicrobia:37|Halobacteria:29|Unclassified_Candid…	Thermoprotei:68|Unclassified_Nitrososphaerota:11|Unclassified_Archaea:8|Unclassified_Candidatus_Bathyarchaeota:4|Unclassified_Candidatus_Marsarchaeota:3|Unclassified_Candidatus_Woesearchaeota:3|Theionarchaea:2|Hadesarchaea:1|Candidatus_Methanomethylicia:1|Unclassified_Thermoproteota:1|Candidatus_Bathyarchaeia:1	Halobacteria:616|Methanomicrobia:286|Methanobacteria:250|Thermoprotei:92|Thermococci:75|Methanococci:45|Unclassified_Archaea:28|Archaeoglobi:26|Unclassified_Euryarchaeota:26|Unclassified_Nitrososphaerota:19|Unclassified_Candidatus_Parvarchaeota:16|Candidatus_Poseidoniia:14|Thermoplasmata:12|Unclassified_Thermoproteota:9|Candidatus_Methanofastidiosa:8|Unclassified_Candidatus_Marsarchaeota:7|Unclas…	Halobacteria:13|Thermoplasmata:2|Thermoprotei:1|Unclassified_Candidatus_Woesearchaeota:1	Unclassified_Euryarchaeota:1
M00004|Pentose_phosphate_pathway_(Pentose_phosphate_cycle)	15	8	347	1759	856	15	1	K13937,K01057,K07404:473.93,114.33,129.30|K13937,K00036,K19243:473.93,370.97,263.87|K00033:145.90|K01783:256.80|K01807,K01808:51.03,179.10|K00615:206.03|K00616,K13810:143.47,642.23|K01810,K06859,K15916,K13810:180.10,111.23,164.00,642.23	Unclassified_Archaea:81|Unclassified_Euryarchaeota:52|Unclassified_Nitrososphaerota:34|Unclassified_Candidatus_Aenigmatarchaeota:26|Unclassified_Thermoproteota:24|Unclassified_Candidatus_Micrarchaeota:22|Unclassified_Nanoarchaeota:12|Methanomicrobia:10|Thermoprotei:9|Methanobacteria:9|Unclassified_Candidatus_Woesearchaeota:8|Unclassified_Candidatus_Parvarchaeota:8|Thermoplasmata:7|Candidatus_Nano…	Methanomicrobia:300|Thermoprotei:300|Methanobacteria:248|Unclassified_Nitrososphaerota:173|Halobacteria:98|Thermococci:86|Unclassified_Archaea:82|Unclassified_Euryarchaeota:71|Unclassified_Thermoproteota:61|Unclassified_Candidatus_Bathyarchaeota:41|Nitrososphaeria:36|Archaeoglobi:35|Thermoplasmata:26|Unclassified_Candidatus_Micrarchaeota:24|Unclassified_Candidatus_Woesearchaeota:23|Candidatus_Pos…	Halobacteria:549|Unclassified_Nitrososphaerota:56|Thermoplasmata:55|Methanococci:45|Unclassified_Euryarchaeota:35|Unclassified_Archaea:26|Nitrososphaeria:18|Unclassified_Candidatus_Woesearchaeota:12|Methanomicrobia:12|Unclassified_Candidatus_Marsarchaeota:8|Unclassified_Candidatus_Bathyarchaeota:8|Unclassified_Candidatus_Thorarchaeota:4|Unclassified_Candidatus_Thermoplasmatota:4|Candidatus_Methan…	Halobacteria:8|Unclassified_Archaea:3|Unclassified_Candidatus_Diapherotrites:2|Methanomicrobia:1|Unclassified_Nitrososphaerota:1	Unclassified_Archaea:1
M00064|ADP-L-glycero-D-manno-heptose_biosynthesis	6	5	2699	251	16	11	1	K03271:122.27|K03272,K21344:404.70,406.03|K03273:157.47|K03272,K21345:404.70,230.73|K03274:254.10	Halobacteria:658|Thermoprotei:309|Methanomicrobia:304|Methanobacteria:257|Unclassified_Nitrososphaerota:230|Unclassified_Archaea:161|Unclassified_Euryarchaeota:111|Thermococci:86|Unclassified_Thermoproteota:82|Unclassified_Candidatus_Bathyarchaeota:50|Nitrososphaeria:47|Unclassified_Candidatus_Micrarchaeota:44|Unclassified_Candidatus_Aenigmatarchaeota:38|Archaeoglobi:37|Thermoplasmata:37|Unclassi…	Thermoplasmata:51|Unclassified_Euryarchaeota:47|Unclassified_Nitrososphaerota:34|Unclassified_Archaea:26|Methanomicrobia:19|Candidatus_Poseidoniia:15|Unclassified_Candidatus_Woesearchaeota:10|Nitrososphaeria:10|Unclassified_Thermoproteota:7|Unclassified_Candidatus_Micrarchaeota:5|Unclassified_Nanoarchaeota:5|Methanococci:4|Unclassified_Candidatus_Lokiarchaeota:3|Unclassified_Candidatus_Aenigmatar…	Methanococci:11|Unclassified_Candidatus_Woesearchaeota:3|Unclassified_Archaea:2	Unclassified_Archaea:4|Methanococci:4|Unclassified_Candidatus_Woesearchaeota:3	Unclassified_Candidatus_Woesearchaeota:1
M00098|Acylglycerol_degradation	16	2	2719	0	258	0	1	K01046,K12298,K16816,K13534,K14073,K14074,K14075,K14076,K22283,K14452,K22284,K14674,K14675,K17900:66.03,683.87,603.97,655.40,561.37,661.77,639.93,715.40,641.90,603.20,689.73,534.23,494.13,373.90|K01054,K25824:217.83,615.63	Halobacteria:605|Methanomicrobia:290|Thermoprotei:272|Unclassified_Nitrososphaerota:262|Methanobacteria:255|Unclassified_Archaea:183|Unclassified_Euryarchaeota:156|Thermoplasmata:86|Unclassified_Thermoproteota:85|Unclassified_Candidatus_Bathyarchaeota:52|Unclassified_Candidatus_Micrarchaeota:49|Nitrososphaeria:48|Methanococci:45|Unclassified_Candidatus_Aenigmatarchaeota:41|Unclassified_Candidatus…	-	Thermococci:75|Halobacteria:53|Thermoprotei:39|Methanomicrobia:33|Nitrososphaeria:9|Unclassified_Archaea:9|Unclassified_Candidatus_Woesearchaeota:8|Archaeoglobi:5|Unclassified_Thermoproteota:4|Unclassified_Candidatus_Thorarchaeota:3|Unclassified_Nanoarchaeota:3|Unclassified_Candidatus_Heimdallarchaeota:2|Methanobacteria:2|Unclassified_Euryarchaeota:2|Unclassified_Nitrososphaerota:2|Unclassified_C…	-	Unclassified_Archaea:1
M00118|Glutathione_biosynthesis_glutamate_=>_glutathione	5	2	2806	0	171	0	1	K11204+K11205,K01919:351.30+121.17,80.40|K21456,K01920:334.57,137.57	Halobacteria:658|Methanomicrobia:323|Thermoprotei:311|Unclassified_Nitrososphaerota:263|Unclassified_Archaea:193|Unclassified_Euryarchaeota:157|Methanobacteria:93|Unclassified_Thermoproteota:89|Thermoplasmata:88|Thermococci:86|Nitrososphaeria:57|Unclassified_Candidatus_Bathyarchaeota:52|Unclassified_Candidatus_Micrarchaeota:48|Methanococci:45|Unclassified_Candidatus_Aenigmatarchaeota:41|Unclassif…	-	Methanobacteria:164|Unclassified_Candidatus_Woesearchaeota:3|Unclassified_Candidatus_Lokiarchaeota:2|Unclassified_Euryarchaeota:1|Unclassified_Candidatus_Micrarchaeota:1	-	Unclassified_Nitrososphaerota:1
M00959|Guanine_ribonucleotide_degradation_GMP_=>_Urate	21	4	1232	1726	19	0	1	K01081,K19970,K11751,K03787,K02566,K08693,K20881:153.07,624.60,479.47,155.90,258.37,760.30,116.20|K03783,K03784,K09913,K05810:169.67,228.80,49.33,54.00|K01487:311.67|K00106,K00087+K13479+K13480,K13481+K13482,K11177+K11178+K13483:1591.80,846.30+311.47+244.00,456.70+1086.53,651.33+249.90+250.67	Unclassified_Nitrososphaerota:234|Unclassified_Archaea:156|Thermoprotei:150|Unclassified_Euryarchaeota:120|Unclassified_Thermoproteota:77|Thermoplasmata:70|Nitrososphaeria:57|Unclassified_Candidatus_Bathyarchaeota:42|Unclassified_Candidatus_Aenigmatarchaeota:41|Unclassified_Candidatus_Woesearchaeota:39|Unclassified_Candidatus_Micrarchaeota:38|Halobacteria:29|Methanomicrobia:25|Unclassified_Candid…	Halobacteria:616|Methanomicrobia:298|Methanobacteria:250|Thermoprotei:160|Thermococci:73|Methanococci:45|Unclassified_Archaea:37|Unclassified_Euryarchaeota:37|Archaeoglobi:31|Unclassified_Nitrososphaerota:30|Unclassified_Candidatus_Parvarchaeota:16|Thermoplasmata:16|Candidatus_Poseidoniia:14|Unclassified_Thermoproteota:12|Unclassified_Candidatus_Micrarchaeota:11|Unclassified_Candidatus_Marsarchae…	Halobacteria:13|Thermococci:2|Thermoplasmata:2|Thermoprotei:1|Unclassified_Candidatus_Woesearchaeota:1	-	Unclassified_Euryarchaeota:1
M00627|beta-Lactam_resistance_Bla_system	4	3	2730	232	15	0	1	K02172:63.23|K02171:43.87|K18766,K17836:343.40,92.93	Halobacteria:605|Methanomicrobia:315|Thermoprotei:280|Unclassified_Nitrososphaerota:260|Methanobacteria:257|Unclassified_Archaea:184|Unclassified_Euryarchaeota:145|Unclassified_Thermoproteota:85|Thermoplasmata:84|Nitrososphaeria:57|Unclassified_Candidatus_Micrarchaeota:48|Unclassified_Candidatus_Bathyarchaeota:45|Methanococci:45|Unclassified_Candidatus_Aenigmatarchaeota:40|Unclassified_Candidatus…	Thermococci:83|Halobacteria:46|Thermoprotei:31|Archaeoglobi:14|Unclassified_Euryarchaeota:11|Unclassified_Archaea:9|Unclassified_Candidatus_Bathyarchaeota:6|Unclassified_Nanoarchaeota:5|Methanomicrobia:5|Unclassified_Candidatus_Woesearchaeota:4|Unclassified_Nitrososphaerota:4|Thermoplasmata:3|Unclassified_Thermoproteota:3|Unclassified_Candidatus_Heimdallarchaeota:2|Unclassified_Candidatus_Aenigma…	Halobacteria:7|Methanomicrobia:3|Unclassified_Euryarchaeota:2|Theionarchaea:1|Thermoplasmata:1|Unclassified_Thermoproteota:1	-	Unclassified_Candidatus_Bathyarchaeota:1
M00597|Anoxygenic_photosystem_II	2	1	2977	0	0	0	1	K08928+K08929:328.17+396.07	Halobacteria:658|Methanomicrobia:323|Thermoprotei:311|Unclassified_Nitrososphaerota:264|Methanobacteria:257|Unclassified_Archaea:193|Unclassified_Euryarchaeota:157|Unclassified_Thermoproteota:89|Thermoplasmata:88|Thermococci:86|Nitrososphaeria:57|Unclassified_Candidatus_Bathyarchaeota:52|Unclassified_Candidatus_Micrarchaeota:49|Methanococci:45|Unclassified_Candidatus_Woesearchaeota:43|Unclassifie…	-	-	-	Unclassified_Euryarchaeota:1
M00122|Cobalamin_biosynthesis_cobyrinate_ac-diamide_=>_cobalamin	6	4	501	693	641	1143	0	K00798,K19221:36.03,122.30|K02232:241.87|K02225,K02227:358.00,86.67|K02231:32.63	Unclassified_Archaea:93|Unclassified_Euryarchaeota:82|Unclassified_Nitrososphaerota:49|Thermoprotei:38|Unclassified_Candidatus_Woesearchaeota:25|Unclassified_Candidatus_Micrarchaeota:22|Unclassified_Thermoproteota:22|Thermoplasmata:20|Unclassified_Candidatus_Bathyarchaeota:19|Unclassified_Candidatus_Aenigmatarchaeota:17|Halobacteria:17|Unclassified_Nanoarchaeota:16|Methanomicrobia:10|Unclassified…	Unclassified_Nitrososphaerota:88|Unclassified_Archaea:79|Halobacteria:79|Unclassified_Euryarchaeota:56|Methanobacteria:37|Unclassified_Thermoproteota:37|Thermoprotei:32|Unclassified_Candidatus_Bathyarchaeota:30|Methanomicrobia:29|Unclassified_Candidatus_Micrarchaeota:27|Unclassified_Candidatus_Aenigmatarchaeota:24|Thermoplasmata:22|Unclassified_Candidatus_Woesearchaeota:18|Unclassified_Candidatus…	Methanobacteria:214|Methanomicrobia:162|Thermoprotei:69|Halobacteria:61|Methanococci:31|Unclassified_Nitrososphaerota:24|Unclassified_Thermoproteota:21|Thermoplasmata:9|Thermococci:7|Unclassified_Archaea:7|Archaeoglobi:6|Unclassified_Euryarchaeota:5|Unclassified_Candidatus_Marsarchaeota:3|Unclassified_Candidatus_Bathyarchaeota:3|Methanopyri:3|Unclassified_Candidatus_Altiarchaeota:3|Nitrososphaeri…	Halobacteria:501|Thermoprotei:172|Methanomicrobia:122|Unclassified_Nitrososphaerota:103|Thermococci:70|Nitrososphaeria:42|Thermoplasmata:37|Archaeoglobi:22|Unclassified_Euryarchaeota:15|Unclassified_Archaea:14|Methanococci:12|Unclassified_Thermoproteota:9|Unclassified_Candidatus_Marsarchaeota:7|Unclassified_Candidatus_Altiarchaeota:6|Methanonatronarchaeia:3|Candidatus_Methanoliparia:3|Candidatus_…	-
M00115|NAD_biosynthesis_aspartate_=>_quinolinate_=>_NAD	8	5	721	678	682	897	0	K00278,K06989:521.07,102.90|K03517:102.30|K00767:213.90|K00969,K06210:116.73,102.30|K01916,K01950:285.70,495.73	Unclassified_Archaea:127|Unclassified_Nitrososphaerota:116|Unclassified_Euryarchaeota:69|Thermoprotei:56|Unclassified_Thermoproteota:46|Unclassified_Candidatus_Micrarchaeota:41|Unclassified_Candidatus_Aenigmatarchaeota:40|Unclassified_Candidatus_Woesearchaeota:38|Unclassified_Candidatus_Parvarchaeota:26|Thermoplasmata:26|Halobacteria:22|Unclassified_Nanoarchaeota:17|Nitrososphaeria:15|Unclassifie…	Halobacteria:193|Thermoprotei:108|Unclassified_Euryarchaeota:58|Unclassified_Nitrososphaerota:44|Unclassified_Archaea:39|Unclassified_Thermoproteota:30|Thermoplasmata:25|Methanomicrobia:23|Archaeoglobi:19|Candidatus_Poseidoniia:18|Methanobacteria:17|Unclassified_Candidatus_Bathyarchaeota:17|Unclassified_Candidatus_Altiarchaeota:10|Unclassified_Candidatus_Micrarchaeota:8|Thermococci:8|Candidatus_M…	Thermoprotei:136|Unclassified_Nitrososphaerota:102|Methanomicrobia:95|Methanobacteria:83|Thermococci:78|Halobacteria:52|Nitrososphaeria:36|Unclassified_Archaea:21|Unclassified_Candidatus_Bathyarchaeota:17|Unclassified_Euryarchaeota:14|Thermoplasmata:13|Unclassified_Thermoproteota:9|Unclassified_Candidatus_Altiarchaeota:7|Unclassified_Candidatus_Lokiarchaeota:4|Hadesarchaea:3|Unclassified_Candidat…	Halobacteria:391|Methanomicrobia:198|Methanobacteria:157|Methanococci:44|Thermoplasmata:24|Unclassified_Euryarchaeota:17|Thermoprotei:11|Archaeoglobi:10|Unclassified_Candidatus_Bathyarchaeota:8|Unclassified_Archaea:6|Candidatus_Methanoliparia:5|Unclassified_Thermoproteota:4|Unclassified_Candidatus_Thermoplasmatota:3|Methanopyri:3|Unclassified_Candidatus_Thorarchaeota:3|Unclassified_Candidatus_Hei…	-
M00127|Thiamine_biosynthesis_prokaryotes_AIR_(+_DXP/tyrosine)_=>_TMP/TPP	3	2	855	250	1063	810	0	K03148+K03154:339.33+35.53|K03151:131.33	Unclassified_Nitrososphaerota:239|Unclassified_Archaea:118|Unclassified_Euryarchaeota:85|Nitrososphaeria:56|Unclassified_Thermoproteota:55|Thermoprotei:51|Halobacteria:45|Unclassified_Candidatus_Bathyarchaeota:25|Unclassified_Candidatus_Aenigmatarchaeota:24|Methanomicrobia:23|Candidatus_Poseidoniia:20|Unclassified_Candidatus_Micrarchaeota:18|Unclassified_Candidatus_Woesearchaeota:17|Thermoplasmat…	Halobacteria:193|Thermoprotei:15|Methanobacteria:14|Unclassified_Archaea:6|Methanomicrobia:5|Unclassified_Nanoarchaeota:4|Unclassified_Euryarchaeota:3|Unclassified_Candidatus_Woesearchaeota:2|Candidatus_Nanohaloarchaea:1|Thermoplasmata:1|Candidatus_Poseidoniia:1|Archaeoglobi:1|Candidatus_Nanohalobia:1|Nanohaloarchaea:1|Unclassified_Candidatus_Aenigmatarchaeota:1|Unclassified_Candidatus_Geoarchaeo…	Thermoprotei:225|Methanomicrobia:224|Methanobacteria:81|Unclassified_Archaea:59|Thermoplasmata:54|Unclassified_Euryarchaeota:49|Methanococci:44|Unclassified_Thermoproteota:32|Unclassified_Candidatus_Micrarchaeota:31|Halobacteria:30|Unclassified_Candidatus_Bathyarchaeota:27|Unclassified_Nitrososphaerota:24|Archaeoglobi:21|Unclassified_Candidatus_Woesearchaeota:20|Unclassified_Candidatus_Aenigmatar…	Halobacteria:390|Methanobacteria:159|Thermococci:82|Methanomicrobia:71|Unclassified_Euryarchaeota:21|Thermoprotei:20|Thermoplasmata:20|Archaeoglobi:11|Unclassified_Archaea:10|Unclassified_Candidatus_Woesearchaeota:4|Hadesarchaea:4|Unclassified_Candidatus_Lokiarchaeota:2|Unclassified_Thermoproteota:2|Unclassified_Nanoarchaeota:2|Candidatus_Hadarchaeia:2|Nanohaloarchaea:2|Candidatus_Nanoarchaeia:2|…	-
M00895|Thiamine_biosynthesis_prokaryotes_AIR_(+_DXP/glycine)_=>_TMP/TPP	3	2	855	250	1063	810	0	K03148+K03154:339.33+35.53|K03151:131.33	Unclassified_Nitrososphaerota:239|Unclassified_Archaea:118|Unclassified_Euryarchaeota:85|Nitrososphaeria:56|Unclassified_Thermoproteota:55|Thermoprotei:51|Halobacteria:45|Unclassified_Candidatus_Bathyarchaeota:25|Unclassified_Candidatus_Aenigmatarchaeota:24|Methanomicrobia:23|Candidatus_Poseidoniia:20|Unclassified_Candidatus_Micrarchaeota:18|Unclassified_Candidatus_Woesearchaeota:17|Thermoplasmat…	Halobacteria:193|Thermoprotei:15|Methanobacteria:14|Unclassified_Archaea:6|Methanomicrobia:5|Unclassified_Nanoarchaeota:4|Unclassified_Euryarchaeota:3|Unclassified_Candidatus_Woesearchaeota:2|Candidatus_Nanohaloarchaea:1|Thermoplasmata:1|Candidatus_Poseidoniia:1|Archaeoglobi:1|Candidatus_Nanohalobia:1|Nanohaloarchaea:1|Unclassified_Candidatus_Aenigmatarchaeota:1|Unclassified_Candidatus_Geoarchaeo…	Thermoprotei:225|Methanomicrobia:224|Methanobacteria:81|Unclassified_Archaea:59|Thermoplasmata:54|Unclassified_Euryarchaeota:49|Methanococci:44|Unclassified_Thermoproteota:32|Unclassified_Candidatus_Micrarchaeota:31|Halobacteria:30|Unclassified_Candidatus_Bathyarchaeota:27|Unclassified_Nitrososphaerota:24|Archaeoglobi:21|Unclassified_Candidatus_Woesearchaeota:20|Unclassified_Candidatus_Aenigmatar…	Halobacteria:390|Methanobacteria:159|Thermococci:82|Methanomicrobia:71|Unclassified_Euryarchaeota:21|Thermoprotei:20|Thermoplasmata:20|Archaeoglobi:11|Unclassified_Archaea:10|Unclassified_Candidatus_Woesearchaeota:4|Hadesarchaea:4|Unclassified_Candidatus_Lokiarchaeota:2|Unclassified_Thermoproteota:2|Unclassified_Nanoarchaeota:2|Candidatus_Hadarchaeia:2|Nanohaloarchaea:2|Candidatus_Nanoarchaeia:2|…	-
M00914|Coenzyme_A_biosynthesis_archaea_2-oxoisovalerate_=>_4-phosphopantoate_=>_CoA	7	7	454	661	1158	705	0	K00606:98.07|K00077:78.27|K06982:128.33|K09722:173.30|K13038:255.23|K02201:211.37|K09735:79.17	Unclassified_Archaea:114|Unclassified_Nitrososphaerota:71|Unclassified_Euryarchaeota:46|Unclassified_Candidatus_Woesearchaeota:38|Unclassified_Thermoproteota:31|Unclassified_Candidatus_Micrarchaeota:27|Unclassified_Candidatus_Aenigmatarchaeota:18|Unclassified_Candidatus_Parvarchaeota:18|Unclassified_Nanoarchaeota:16|Nitrososphaeria:10|Unclassified_Candidatus_Diapherotrites:8|Unclassified_Candidat…	Unclassified_Nitrososphaerota:85|Thermoprotei:66|Methanobacteria:65|Unclassified_Euryarchaeota:62|Unclassified_Archaea:55|Thermoplasmata:42|Methanomicrobia:41|Halobacteria:37|Unclassified_Thermoproteota:33|Unclassified_Candidatus_Bathyarchaeota:33|Unclassified_Candidatus_Aenigmatarchaeota:23|Unclassified_Candidatus_Micrarchaeota:20|Unclassified_Candidatus_Altiarchaeota:17|Unclassified_Candidatus_…	Methanomicrobia:275|Methanobacteria:192|Thermoprotei:181|Unclassified_Nitrososphaerota:105|Halobacteria:96|Unclassified_Euryarchaeota:47|Methanococci:44|Nitrososphaeria:41|Thermoplasmata:41|Archaeoglobi:26|Unclassified_Archaea:20|Unclassified_Thermoproteota:16|Candidatus_Poseidoniia:14|Candidatus_Methanofastidiosa:8|Unclassified_Candidatus_Bathyarchaeota:8|Thermococci:8|Candidatus_Methanoliparia:…	Halobacteria:524|Thermococci:77|Thermoprotei:58|Unclassified_Thermoproteota:9|Unclassified_Candidatus_Lokiarchaeota:7|Unclassified_Candidatus_Thorarchaeota:4|Unclassified_Candidatus_Heimdallarchaeota:4|Unclassified_Archaea:4|Unclassified_Nitrososphaerota:3|Unclassified_Candidatus_Bathyarchaeota:3|Candidatus_Methanomethylicia:3|Unclassified_Euryarchaeota:3|Unclassified_Candidatus_Verstraetearchaeo…	-
M00029|Urea_cycle	6	5	503	736	1203	536	0	K01948:2308.63|K00611:367.07|K01940:125.93|K01755,K14681:178.73,965.53|K01476:188.63	Unclassified_Archaea:103|Unclassified_Euryarchaeota:80|Unclassified_Nitrososphaerota:52|Unclassified_Candidatus_Woesearchaeota:31|Unclassified_Thermoproteota:31|Unclassified_Candidatus_Aenigmatarchaeota:30|Unclassified_Candidatus_Parvarchaeota:26|Unclassified_Candidatus_Micrarchaeota:25|Unclassified_Nanoarchaeota:17|Thermoprotei:16|Thermoplasmata:15|Unclassified_Candidatus_Bathyarchaeota:13|Uncla…	Unclassified_Nitrososphaerota:110|Thermoprotei:87|Thermococci:71|Unclassified_Archaea:64|Unclassified_Euryarchaeota:49|Thermoplasmata:46|Methanomicrobia:45|Unclassified_Thermoproteota:36|Halobacteria:32|Methanobacteria:27|Unclassified_Candidatus_Bathyarchaeota:25|Nitrososphaeria:23|Unclassified_Candidatus_Micrarchaeota:19|Candidatus_Poseidoniia:18|Unclassified_Candidatus_Altiarchaeota:10|Archaeog…	Methanomicrobia:266|Methanobacteria:227|Thermoprotei:208|Unclassified_Nitrososphaerota:100|Halobacteria:99|Methanococci:45|Unclassified_Euryarchaeota:28|Thermoplasmata:27|Archaeoglobi:26|Nitrososphaeria:26|Unclassified_Archaea:24|Unclassified_Thermoproteota:22|Unclassified_Candidatus_Bathyarchaeota:14|Thermococci:14|Unclassified_Candidatus_Altiarchaeota:8|Unclassified_Candidatus_Marsarchaeota:8|U…	Halobacteria:523|Methanomicrobia:5|Unclassified_Nitrososphaerota:2|Nitrososphaeria:2|Unclassified_Archaea:2|Unclassified_Euryarchaeota:1|Methanobacteria:1	-
M00016|Lysine_biosynthesis_succinyl-DAP_pathway_aspartate_=>_lysine	13	9	625	1068	841	444	0	K00928,K12524,K12525,K12526:352.37,750.40,770.90,465.37|K00133:218.23|K01714:258.37|K00215:136.13|K00674:156.30|K00821,K14267:499.57,446.37|K01439:278.90|K01778:65.70|K01586,K12526:305.00,465.37	Unclassified_Archaea:111|Unclassified_Euryarchaeota:96|Unclassified_Nitrososphaerota:82|Thermoplasmata:44|Unclassified_Candidatus_Aenigmatarchaeota:38|Unclassified_Thermoproteota:37|Thermoprotei:34|Unclassified_Candidatus_Woesearchaeota:33|Unclassified_Candidatus_Micrarchaeota:31|Unclassified_Candidatus_Parvarchaeota:26|Candidatus_Poseidoniia:23|Unclassified_Nanoarchaeota:15|Nitrososphaeria:8|Unc…	Thermoprotei:277|Unclassified_Nitrososphaerota:182|Halobacteria:85|Thermococci:83|Unclassified_Archaea:73|Nitrososphaeria:49|Unclassified_Thermoproteota:46|Unclassified_Euryarchaeota:44|Unclassified_Candidatus_Bathyarchaeota:35|Methanomicrobia:26|Methanobacteria:24|Thermoplasmata:23|Unclassified_Candidatus_Micrarchaeota:16|Unclassified_Candidatus_Marsarchaeota:12|Candidatus_Methanofastidiosa:8|Ar…	Halobacteria:367|Methanobacteria:233|Methanomicrobia:173|Unclassified_Candidatus_Bathyarchaeota:10|Unclassified_Candidatus_Altiarchaeota:8|Unclassified_Euryarchaeota:7|Unclassified_Thermoproteota:6|Hadesarchaea:5|Unclassified_Archaea:5|Unclassified_Candidatus_Woesearchaeota:4|Archaeoglobi:4|Thermoplasmata:4|Unclassified_Candidatus_Lokiarchaeota:3|Unclassified_Candidatus_Korarchaeota:2|Unclassifie…	Halobacteria:201|Methanomicrobia:123|Methanococci:45|Archaeoglobi:25|Thermoplasmata:17|Unclassified_Euryarchaeota:11|Unclassified_Candidatus_Altiarchaeota:5|Unclassified_Archaea:4|Candidatus_Methanoliparia:4|Methanopyri:3|Methanonatronarchaeia:2|Candidatus_Hydrothermarchaeia:1|Unclassified_Candidatus_Bathyarchaeota:1|Unclassified_Candidatus_Diapherotrites:1|Unclassified_Candidatus_Geoarchaeota:1	-
M00868|Heme_biosynthesis_animals_and_fungi_glycine_=>_heme	11	8	934	1654	248	142	0	K00643:405.13|K01698:79.50|K01749:125.47|K01719:43.90|K01599:182.23|K00228:66.83|K00231:142.47|K03795,K03794,K01772,K02190:121.23,138.33,89.67,139.47	Unclassified_Archaea:160|Unclassified_Euryarchaeota:118|Unclassified_Nitrososphaerota:96|Thermococci:77|Unclassified_Thermoproteota:54|Thermoprotei:50|Unclassified_Candidatus_Woesearchaeota:43|Unclassified_Candidatus_Bathyarchaeota:43|Unclassified_Candidatus_Aenigmatarchaeota:41|Unclassified_Candidatus_Micrarchaeota:38|Thermoplasmata:37|Candidatus_Poseidoniia:23|Unclassified_Candidatus_Parvarchae…	Halobacteria:394|Methanomicrobia:309|Thermoprotei:259|Methanobacteria:257|Unclassified_Nitrososphaerota:153|Nitrososphaeria:52|Unclassified_Thermoproteota:32|Archaeoglobi:31|Thermoplasmata:25|Unclassified_Euryarchaeota:25|Unclassified_Archaea:21|Methanococci:18|Thermococci:9|Candidatus_Methanofastidiosa:8|Unclassified_Candidatus_Bathyarchaeota:8|Unclassified_Candidatus_Parvarchaeota:8|Unclassifie…	Halobacteria:119|Methanococci:27|Thermoplasmata:26|Unclassified_Nitrososphaerota:15|Unclassified_Euryarchaeota:12|Unclassified_Archaea:11|Unclassified_Candidatus_Marsarchaeota:8|Methanomicrobia:6|Unclassified_Candidatus_Verstraetearchaeota:4|Unclassified_Candidatus_Micrarchaeota:4|Unclassified_Thermoproteota:3|Thermoprotei:2|Unclassified_Candidatus_Heimdallarchaeota:2|Archaeoglobi:2|Methanonatron…	Halobacteria:137|Unclassified_Euryarchaeota:3|Candidatus_Hydrothermarchaeia:1|Unclassified_Archaea:1	-
M00121|Heme_biosynthesis_plants_and_bacteria_glutamate_=>_heme	18	10	697	611	1529	141	0	K01885:315.53|K02492:72.33|K01845:313.37|K01698:79.50|K01749:125.47|K01719,K13542,K13543:43.90,402.40,433.60|K01599:182.23|K00228,K02495:66.83,254.90|K00230,K00231,K08973:71.33,142.47,45.57|K03795,K03794,K01772,K02190:121.23,138.33,89.67,139.47	Unclassified_Archaea:131|Unclassified_Euryarchaeota:92|Thermococci:54|Unclassified_Nitrososphaerota:48|Unclassified_Candidatus_Aenigmatarchaeota:41|Unclassified_Candidatus_Woesearchaeota:39|Unclassified_Candidatus_Micrarchaeota:36|Thermoprotei:35|Thermoplasmata:33|Unclassified_Thermoproteota:31|Candidatus_Poseidoniia:23|Unclassified_Candidatus_Bathyarchaeota:23|Unclassified_Candidatus_Parvarchaeo…	Unclassified_Nitrososphaerota:110|Thermoprotei:55|Halobacteria:54|Unclassified_Thermoproteota:48|Unclassified_Archaea:43|Methanomicrobia:42|Unclassified_Euryarchaeota:41|Methanobacteria:41|Thermococci:32|Unclassified_Candidatus_Bathyarchaeota:26|Nitrososphaeria:18|Thermoplasmata:15|Unclassified_Candidatus_Micrarchaeota:12|Unclassified_Candidatus_Parvarchaeota:10|Archaeoglobi:8|Unclassified_Candid…	Halobacteria:464|Methanomicrobia:277|Thermoprotei:221|Methanobacteria:216|Unclassified_Nitrososphaerota:106|Methanococci:42|Thermoplasmata:40|Nitrososphaeria:37|Archaeoglobi:26|Unclassified_Euryarchaeota:23|Unclassified_Archaea:18|Unclassified_Thermoproteota:10|Candidatus_Methanofastidiosa:8|Unclassified_Candidatus_Marsarchaeota:8|Unclassified_Candidatus_Verstraetearchaeota:5|Candidatus_Methanome…	Halobacteria:135|Unclassified_Candidatus_Heimdallarchaeota:2|Unclassified_Euryarchaeota:2|Candidatus_Hydrothermarchaeia:1|Unclassified_Archaea:1	-
M00975|Betaine_degradation_bacteria_betaine_=>_pyruvate	16	5	552	2109	202	115	0	K00479+K21832:568.43+463.30|K00309,K00315,K21833+K21834+K25960+K25961:873.83,780.73,1035.20+835.37+293.07+187.27|K00301,K00302+K00303+K00304+K00305,K21833+K21834+K25960+K25961:417.53,1347.53+639.87+110.40+135.87,1035.20+835.37+293.07+187.27|K00600:83.83|K01752,K01754:23.77,261.00	Unclassified_Archaea:102|Unclassified_Euryarchaeota:85|Unclassified_Nitrososphaerota:61|Unclassified_Thermoproteota:33|Methanococci:29|Unclassified_Candidatus_Micrarchaeota:28|Methanomicrobia:26|Unclassified_Candidatus_Woesearchaeota:26|Unclassified_Candidatus_Aenigmatarchaeota:25|Thermoplasmata:25|Unclassified_Candidatus_Parvarchaeota:23|Unclassified_Candidatus_Bathyarchaeota:15|Unclassified_Nan…	Halobacteria:343|Thermoprotei:302|Methanomicrobia:297|Methanobacteria:253|Unclassified_Nitrososphaerota:202|Unclassified_Archaea:89|Thermococci:86|Unclassified_Euryarchaeota:72|Thermoplasmata:63|Unclassified_Thermoproteota:56|Nitrososphaeria:50|Unclassified_Candidatus_Bathyarchaeota:37|Archaeoglobi:33|Unclassified_Candidatus_Micrarchaeota:21|Candidatus_Poseidoniia:19|Unclassified_Candidatus_Woese…	Halobacteria:198|Unclassified_Archaea:2|Unclassified_Euryarchaeota:1|Unclassified_Nitrososphaerota:1	Halobacteria:115	-
M00125|Riboflavin_biosynthesis_plants_and_bacteria_GTP_=>_riboflavin/FMN/FAD	11	4	2718	150	8	102	0	K01497,K14652:273.30,358.70|K01498,K11752:278.70,197.57|K00082,K11752:350.83,197.57|K22912,K20860,K20861,K20862,K21063,K21064:172.47,118.23,375.13,178.20,253.63,176.80	Halobacteria:652|Thermoprotei:311|Methanomicrobia:289|Unclassified_Nitrososphaerota:264|Methanobacteria:257|Unclassified_Archaea:185|Unclassified_Euryarchaeota:117|Unclassified_Thermoproteota:84|Nitrososphaeria:57|Thermoplasmata:55|Unclassified_Candidatus_Bathyarchaeota:51|Unclassified_Candidatus_Micrarchaeota:46|Methanococci:45|Unclassified_Candidatus_Aenigmatarchaeota:41|Unclassified_Candidatus…	Methanomicrobia:33|Thermoplasmata:28|Archaeoglobi:27|Unclassified_Euryarchaeota:26|Candidatus_Poseidoniia:9|Halobacteria:6|Unclassified_Thermoproteota:5|Unclassified_Candidatus_Heimdallarchaeota:4|Unclassified_Archaea:3|Unclassified_Candidatus_Thorarchaeota:2|Thermococci:2|Methanonatronarchaeia:1|Unclassified_Candidatus_Parvarchaeota:1|Unclassified_Candidatus_Bathyarchaeota:1|Unclassified_Candida…	Unclassified_Candidatus_Lokiarchaeota:2|Unclassified_Euryarchaeota:1|Thermococci:1|Thermoplasmata:1|Unclassified_Candidatus_Parvarchaeota:1|Unclassified_Candidatus_Thorarchaeota:1|Unclassified_Candidatus_Woesearchaeota:1	Thermococci:51|Unclassified_Euryarchaeota:14|Candidatus_Poseidoniia:11|Unclassified_Candidatus_Diapherotrites:6|Unclassified_Archaea:5|Unclassified_Candidatus_Woesearchaeota:4|Thermoplasmata:4|Unclassified_Candidatus_Micrarchaeota:3|Theionarchaea:2|Methanomicrobia:1|Unclassified_Candidatus_Thorarchaeota:1	-
M00012|Glyoxylate_cycle	9	5	1512	1171	215	80	0	K01647:368.13|K01681,K01682:1310.87,675.17|K01637:193.17|K01638,K19282:162.30,797.10|K00026,K00025,K00024:515.87,534.00,371.37	Methanobacteria:257|Methanomicrobia:165|Unclassified_Archaea:164|Unclassified_Nitrososphaerota:115|Unclassified_Euryarchaeota:108|Thermococci:81|Unclassified_Thermoproteota:75|Thermoprotei:73|Thermoplasmata:49|Unclassified_Candidatus_Bathyarchaeota:48|Methanococci:45|Unclassified_Candidatus_Aenigmatarchaeota:41|Unclassified_Candidatus_Woesearchaeota:38|Unclassified_Candidatus_Micrarchaeota:32|Hal…	Halobacteria:420|Thermoprotei:203|Unclassified_Nitrososphaerota:144|Methanomicrobia:133|Unclassified_Euryarchaeota:48|Thermoplasmata:37|Nitrososphaeria:36|Archaeoglobi:30|Unclassified_Archaea:25|Candidatus_Poseidoniia:20|Unclassified_Candidatus_Micrarchaeota:17|Unclassified_Candidatus_Parvarchaeota:13|Unclassified_Thermoproteota:11|Unclassified_Candidatus_Marsarchaeota:5|Unclassified_Candidatus_W…	Halobacteria:139|Thermoprotei:35|Methanomicrobia:25|Unclassified_Candidatus_Marsarchaeota:5|Unclassified_Thermoproteota:3|Unclassified_Nitrososphaerota:3|Unclassified_Archaea:3|Unclassified_Candidatus_Heimdallarchaeota:1|Unclassified_Euryarchaeota:1	Halobacteria:74|Unclassified_Nitrososphaerota:2|Thermoplasmata:2|Unclassified_Archaea:1|Unclassified_Euryarchaeota:1	-
M00529|Denitrification_nitrate_=>_nitrogen	10	4	2249	571	108	50	0	K00370+K00371+K00374,K02567+K02568:821.20+381.67+166.57,719.30+33.17|K00368,K15864:187.73,437.97|K04561+K02305:142.37+85.13|K00376:489.57	Methanomicrobia:319|Methanobacteria:257|Halobacteria:253|Thermoprotei:231|Unclassified_Archaea:177|Unclassified_Euryarchaeota:152|Unclassified_Nitrososphaerota:124|Thermococci:86|Thermoplasmata:85|Unclassified_Thermoproteota:73|Unclassified_Candidatus_Bathyarchaeota:52|Unclassified_Candidatus_Micrarchaeota:49|Methanococci:45|Unclassified_Candidatus_Woesearchaeota:41|Unclassified_Candidatus_Aenigm…	Halobacteria:257|Unclassified_Nitrososphaerota:140|Thermoprotei:78|Nitrososphaeria:46|Unclassified_Thermoproteota:16|Unclassified_Archaea:15|Unclassified_Euryarchaeota:6|Thermoplasmata:3|Unclassified_Candidatus_Woesearchaeota:2|Unclassified_Candidatus_Geothermarchaeota:2|Unclassified_Candidatus_Geoarchaeota:1|Candidatus_Hydrothermarchaeia:1|Candidatus_Poseidoniia:1|Unclassified_Candidatus_Heimdal…	Halobacteria:99|Methanomicrobia:3|Thermoprotei:2|Unclassified_Archaea:1|Archaeoglobi:1|Unclassified_Candidatus_Heimdallarchaeota:1|Unclassified_Candidatus_Hydrothermarchaeota:1	Halobacteria:49|Archaeoglobi:1	-
M00061|D-Glucuronate_degradation_D-glucuronate_=>_pyruvate_+_D-glyceraldehyde_3P	7	5	2261	557	112	48	0	K01812:134.50|K00040:595.90|K01686,K08323:142.50,394.57|K00874:237.90|K01625,K17463:191.60,265.20	Methanomicrobia:322|Unclassified_Nitrososphaerota:257|Thermoprotei:256|Methanobacteria:245|Unclassified_Archaea:182|Unclassified_Euryarchaeota:154|Unclassified_Thermoproteota:82|Halobacteria:81|Thermoplasmata:79|Thermococci:78|Nitrososphaeria:56|Unclassified_Candidatus_Micrarchaeota:49|Methanococci:45|Unclassified_Candidatus_Woesearchaeota:43|Unclassified_Candidatus_Bathyarchaeota:42|Unclassified…	Halobacteria:421|Thermoprotei:55|Methanobacteria:12|Unclassified_Archaea:11|Thermoplasmata:9|Thermococci:8|Unclassified_Candidatus_Bathyarchaeota:8|Unclassified_Nitrososphaerota:7|Unclassified_Thermoproteota:7|Unclassified_Candidatus_Marsarchaeota:5|Unclassified_Candidatus_Thorarchaeota:4|Unclassified_Euryarchaeota:4|Unclassified_Candidatus_Lokiarchaeota:2|Methanomicrobia:1|Candidatus_Poseidoniia…	Halobacteria:108|Unclassified_Candidatus_Lokiarchaeota:2|Unclassified_Candidatus_Bathyarchaeota:2	Halobacteria:48	-
M00855|Glycogen_degradation_glycogen_=>_glucose-6P	10	4	1876	868	189	45	0	K00688,K16153:75.87,1748.47|K01196,K00705,K22451:405.53,73.57,175.33|K01196,K02438,K01200:405.53,1022.73,388.67|K15779,K01835,K15778:1002.87,368.63,482.37	Halobacteria:370|Unclassified_Nitrososphaerota:246|Methanobacteria:245|Unclassified_Archaea:161|Methanomicrobia:124|Unclassified_Euryarchaeota:122|Thermoprotei:104|Thermoplasmata:74|Unclassified_Thermoproteota:57|Nitrososphaeria:56|Unclassified_Candidatus_Micrarchaeota:42|Archaeoglobi:38|Unclassified_Candidatus_Bathyarchaeota:29|Unclassified_Candidatus_Woesearchaeota:28|Unclassified_Candidatus_Pa…	Halobacteria:275|Methanomicrobia:159|Thermoprotei:151|Methanococci:44|Unclassified_Archaea:28|Unclassified_Euryarchaeota:27|Unclassified_Thermoproteota:23|Unclassified_Candidatus_Aenigmatarchaeota:20|Unclassified_Candidatus_Bathyarchaeota:18|Unclassified_Nitrososphaerota:17|Unclassified_Candidatus_Altiarchaeota:13|Candidatus_Poseidoniia:13|Methanobacteria:12|Thermoplasmata:12|Unclassified_Candida…	Thermoprotei:56|Thermococci:47|Methanomicrobia:36|Halobacteria:13|Unclassified_Thermoproteota:9|Unclassified_Candidatus_Bathyarchaeota:5|Unclassified_Candidatus_Woesearchaeota:4|Unclassified_Candidatus_Lokiarchaeota:4|Unclassified_Euryarchaeota:4|Unclassified_Archaea:3|Candidatus_Methanomethylicia:3|Unclassified_Candidatus_Heimdallarchaeota:1|Conexivisphaeria:1|Unclassified_Candidatus_Aenigmatarc…	Thermococci:34|Unclassified_Euryarchaeota:5|Methanomicrobia:4|Unclassified_Archaea:1|Thermoplasmata:1	-
M00931|Menaquinone_biosynthesis_modified_futalosine_pathway	5	5	2531	243	159	45	0	K11782:124.10|K18285:443.13|K18284:304.27|K11784:438.10|K11785:254.10	Halobacteria:655|Methanomicrobia:293|Methanobacteria:257|Thermoprotei:253|Unclassified_Archaea:183|Unclassified_Euryarchaeota:114|Unclassified_Nitrososphaerota:101|Thermococci:86|Unclassified_Thermoproteota:76|Thermoplasmata:67|Unclassified_Candidatus_Bathyarchaeota:51|Unclassified_Candidatus_Micrarchaeota:49|Methanococci:45|Unclassified_Candidatus_Woesearchaeota:43|Unclassified_Candidatus_Aenigm…	Unclassified_Nitrososphaerota:81|Thermoprotei:58|Unclassified_Euryarchaeota:24|Thermoplasmata:21|Nitrososphaeria:15|Unclassified_Thermoproteota:11|Methanomicrobia:9|Candidatus_Poseidoniia:8|Unclassified_Archaea:6|Archaeoglobi:4|Unclassified_Candidatus_Altiarchaeota:4|Unclassified_Candidatus_Bathyarchaeota:1|Unclassified_Candidatus_Thermoplasmatota:1	Unclassified_Nitrososphaerota:81|Nitrososphaeria:30|Archaeoglobi:16|Unclassified_Euryarchaeota:12|Candidatus_Poseidoniia:8|Methanomicrobia:5|Unclassified_Thermoproteota:2|Unclassified_Archaea:2|Conexivisphaeria:1|Unclassified_Candidatus_Altiarchaeota:1|Halobacteria:1	Methanomicrobia:16|Archaeoglobi:9|Unclassified_Euryarchaeota:8|Unclassified_Candidatus_Altiarchaeota:5|Halobacteria:2|Unclassified_Archaea:2|Candidatus_Hydrothermarchaeia:1|Candidatus_Poseidoniia:1|Unclassified_Nitrososphaerota:1	-
M00740|Methylaspartate_cycle	12	11	1319	1473	149	37	0	K01647:368.13|K01681:1310.87|K00031:155.37|K00261:524.57|K19268+K01846:251.17+103.77|K04835:420.53|K19280:753.50|K14449:271.60|K19281:571.60|K19282:797.10|K00024:371.37	Methanobacteria:257|Methanomicrobia:159|Unclassified_Archaea:158|Unclassified_Nitrososphaerota:111|Unclassified_Euryarchaeota:86|Unclassified_Thermoproteota:62|Thermoprotei:57|Methanococci:45|Unclassified_Candidatus_Aenigmatarchaeota:40|Thermococci:40|Unclassified_Candidatus_Bathyarchaeota:36|Thermoplasmata:32|Unclassified_Candidatus_Woesearchaeota:31|Unclassified_Candidatus_Micrarchaeota:29|Nitr…	Halobacteria:458|Thermoprotei:254|Methanomicrobia:164|Unclassified_Nitrososphaerota:153|Unclassified_Euryarchaeota:72|Thermoplasmata:56|Thermococci:46|Nitrososphaeria:38|Unclassified_Archaea:35|Archaeoglobi:32|Unclassified_Thermoproteota:27|Candidatus_Poseidoniia:21|Unclassified_Candidatus_Micrarchaeota:20|Unclassified_Candidatus_Bathyarchaeota:16|Unclassified_Candidatus_Parvarchaeota:13|Unclassi…	Halobacteria:149	Halobacteria:37	-
M00095|C5_isoprenoid_biosynthesis_mevalonate_pathway	8	7	410	1754	793	21	0	K00626:489.07|K01641:159.53|K00021:205.50|K00869:154.27|K00938,K13273:132.77,86.50|K01597:220.47|K01823:45.03	Unclassified_Archaea:101|Unclassified_Euryarchaeota:57|Unclassified_Nitrososphaerota:51|Unclassified_Candidatus_Woesearchaeota:32|Unclassified_Candidatus_Parvarchaeota:24|Unclassified_Thermoproteota:23|Unclassified_Nanoarchaeota:15|Unclassified_Candidatus_Aenigmatarchaeota:13|Unclassified_Candidatus_Bathyarchaeota:11|Thermoplasmata:10|Methanomicrobia:9|Nanohaloarchaea:7|Thermoprotei:7|Unclassifie…	Methanomicrobia:300|Methanobacteria:257|Unclassified_Nitrososphaerota:213|Thermoprotei:146|Unclassified_Euryarchaeota:92|Thermococci:86|Halobacteria:85|Unclassified_Archaea:80|Thermoplasmata:63|Unclassified_Thermoproteota:62|Nitrososphaeria:51|Methanococci:45|Unclassified_Candidatus_Bathyarchaeota:39|Archaeoglobi:35|Unclassified_Candidatus_Micrarchaeota:29|Unclassified_Candidatus_Aenigmatarchaeot…	Halobacteria:570|Thermoprotei:140|Thermoplasmata:15|Methanomicrobia:14|Unclassified_Candidatus_Micrarchaeota:12|Unclassified_Archaea:11|Unclassified_Euryarchaeota:9|Unclassified_Candidatus_Marsarchaeota:6|Unclassified_Candidatus_Aenigmatarchaeota:4|Unclassified_Thermoproteota:4|Unclassified_Candidatus_Diapherotrites:3|Unclassified_Candidatus_Bathyarchaeota:2|Unclassified_Candidatus_Heimdallarchae…	Thermoprotei:18|Unclassified_Candidatus_Micrarchaeota:2|Unclassified_Archaea:1	-
M00631|D-Galacturonate_degradation_(bacteria)_D-galacturonate_=>_pyruvate_+_D-glyceraldehyde_3P	8	5	2277	576	107	18	0	K01812:134.50|K00041:264.80|K01685,K16849+K16850:570.77,104.97+440.40|K00874:237.90|K01625,K17463:191.60,265.20	Methanomicrobia:322|Thermoprotei:277|Unclassified_Nitrososphaerota:257|Methanobacteria:245|Unclassified_Archaea:182|Unclassified_Euryarchaeota:152|Thermoplasmata:84|Halobacteria:82|Unclassified_Thermoproteota:79|Thermococci:78|Nitrososphaeria:57|Unclassified_Candidatus_Micrarchaeota:49|Methanococci:45|Unclassified_Candidatus_Woesearchaeota:43|Unclassified_Candidatus_Aenigmatarchaeota:41|Unclassif…	Halobacteria:454|Thermoprotei:34|Unclassified_Candidatus_Bathyarchaeota:15|Methanobacteria:12|Unclassified_Archaea:11|Unclassified_Thermoproteota:10|Thermococci:8|Unclassified_Euryarchaeota:6|Unclassified_Nitrososphaerota:5|Unclassified_Candidatus_Lokiarchaeota:5|Unclassified_Candidatus_Thorarchaeota:4|Thermoplasmata:4|Archaeoglobi:3|Unclassified_Candidatus_Geoarchaeota:2|Methanomicrobia:1|Hadesa…	Halobacteria:104|Unclassified_Nitrososphaerota:2|Unclassified_Candidatus_Lokiarchaeota:1	Halobacteria:18	-
M00087|beta-Oxidation	19	4	1922	776	267	13	0	K00232,K00249,K00255,K06445,K09479:174.33,386.47,563.80,377.27,832.97|K01692,K07511,K13767,K01825,K01782,K07514,K07515,K10527:318.30,443.20,315.63,733.43,804.00,901.70,857.43,720.87|K00022,K07516,K01825,K01782,K07514,K07515,K10527:364.97,407.97,733.43,804.00,901.70,857.43,720.87|K00632,K07508,K07509,K07513:500.90,551.77,571.17,561.60	Methanomicrobia:312|Methanobacteria:257|Unclassified_Nitrososphaerota:243|Unclassified_Archaea:165|Unclassified_Euryarchaeota:114|Thermoprotei:107|Thermococci:86|Unclassified_Thermoproteota:65|Halobacteria:64|Thermoplasmata:60|Nitrososphaeria:57|Unclassified_Candidatus_Micrarchaeota:48|Methanococci:45|Unclassified_Candidatus_Woesearchaeota:43|Unclassified_Candidatus_Aenigmatarchaeota:41|Unclassif…	Halobacteria:470|Thermoprotei:95|Unclassified_Euryarchaeota:32|Archaeoglobi:29|Thermoplasmata:25|Unclassified_Archaea:23|Unclassified_Thermoproteota:16|Unclassified_Nitrososphaerota:15|Candidatus_Poseidoniia:15|Unclassified_Candidatus_Bathyarchaeota:12|Methanomicrobia:11|Unclassified_Candidatus_Lokiarchaeota:7|Unclassified_Candidatus_Thorarchaeota:5|Candidatus_Methanoliparia:5|Unclassified_Candid…	Halobacteria:124|Thermoprotei:109|Unclassified_Candidatus_Marsarchaeota:7|Unclassified_Euryarchaeota:6|Unclassified_Nitrososphaerota:6|Unclassified_Thermoproteota:5|Unclassified_Archaea:5|Candidatus_Poseidoniia:4|Thermoplasmata:1	Unclassified_Euryarchaeota:6|Unclassified_Thermoproteota:3|Thermoplasmata:2|Unclassified_Candidatus_Geoarchaeota:1|Candidatus_Poseidoniia:1	-
M00925|Cobalamin_biosynthesis_aerobic_uroporphyrinogen_III_=>_precorrin_2_=>_cobyrinate_ac-diamide	16	11	956	1113	898	11	0	K02303,K13542:253.10,402.40|K03394,K13540:124.83,467.73|K02229:252.00|K05934,K13540,K13541:354.03,467.73,519.00|K05936:234.60|K02228:132.30|K05895:163.87|K00595:217.87|K06042:96.07|K02224:161.07|K02230+K09882+K09883:1015.67+176.30+132.23	Unclassified_Archaea:158|Unclassified_Euryarchaeota:123|Unclassified_Nitrososphaerota:71|Thermococci:61|Thermoprotei:54|Unclassified_Candidatus_Micrarchaeota:49|Unclassified_Candidatus_Bathyarchaeota:47|Halobacteria:47|Unclassified_Thermoproteota:44|Unclassified_Candidatus_Woesearchaeota:43|Unclassified_Candidatus_Aenigmatarchaeota:41|Thermoplasmata:40|Unclassified_Candidatus_Parvarchaeota:27|Can…	Halobacteria:301|Thermoprotei:216|Methanomicrobia:135|Unclassified_Nitrososphaerota:125|Methanobacteria:65|Unclassified_Thermoproteota:39|Archaeoglobi:33|Unclassified_Archaea:32|Nitrososphaeria:29|Thermoplasmata:28|Unclassified_Euryarchaeota:25|Thermococci:25|Candidatus_Methanofastidiosa:8|Unclassified_Candidatus_Marsarchaeota:7|Unclassified_Candidatus_Verstraetearchaeota:7|Unclassified_Candidatu…	Halobacteria:310|Methanobacteria:185|Methanomicrobia:182|Unclassified_Nitrososphaerota:68|Methanococci:44|Thermoprotei:41|Nitrososphaeria:26|Thermoplasmata:16|Unclassified_Euryarchaeota:10|Unclassified_Thermoproteota:6|Unclassified_Candidatus_Marsarchaeota:4|Unclassified_Archaea:3|Archaeoglobi:2|Candidatus_Hydrothermarchaeia:1	Methanobacteria:7|Thermoplasmata:4	-
M00375|Hydroxypropionate-hydroxybutylate_cycle	19	14	1315	1517	136	10	0	K01964+K15037+K15036:976.17+123.63+1071.07|K15017:695.97|K15039:610.00|K15018:1304.67|K15019:337.30|K15020:329.80|K05606:74.00|K01848+K01849:798.50+169.47|K15038,K15017:694.93,695.97|K14465:455.77|K14466,K18861,K25774:863.07,929.13,1025.33|K14534:417.20|K15016:459.87|K00626:489.07	Methanomicrobia:309|Methanobacteria:257|Unclassified_Archaea:157|Unclassified_Euryarchaeota:83|Thermoprotei:46|Methanococci:45|Unclassified_Candidatus_Woesearchaeota:43|Unclassified_Nitrososphaerota:43|Unclassified_Candidatus_Aenigmatarchaeota:41|Unclassified_Candidatus_Micrarchaeota:38|Unclassified_Thermoproteota:35|Unclassified_Candidatus_Bathyarchaeota:31|Unclassified_Candidatus_Parvarchaeota:…	Halobacteria:640|Unclassified_Nitrososphaerota:221|Thermoprotei:122|Thermococci:84|Unclassified_Euryarchaeota:75|Thermoplasmata:66|Nitrososphaeria:53|Unclassified_Thermoproteota:53|Unclassified_Archaea:34|Archaeoglobi:34|Unclassified_Candidatus_Bathyarchaeota:21|Candidatus_Poseidoniia:19|Methanomicrobia:14|Unclassified_Candidatus_Micrarchaeota:11|Candidatus_Methanofastidiosa:8|Unclassified_Candid…	Thermoprotei:133|Unclassified_Archaea:2|Unclassified_Thermoproteota:1	Thermoprotei:10	-
M00909|UDP-N-acetyl-D-glucosamine_biosynthesis_prokaryotes_glucose_=>_UDP-GlcNAc	8	5	463	1997	510	8	0	K00845,K25026:116.37,270.83|K01810,K13810,K15916:180.10,642.23,164.00|K00820:180.43|K03431:439.20|K04042:312.03	Unclassified_Archaea:88|Unclassified_Euryarchaeota:65|Unclassified_Nitrososphaerota:60|Methanomicrobia:34|Unclassified_Thermoproteota:33|Unclassified_Candidatus_Micrarchaeota:28|Thermoplasmata:23|Archaeoglobi:18|Unclassified_Candidatus_Aenigmatarchaeota:13|Unclassified_Candidatus_Woesearchaeota:11|Thermoprotei:10|Unclassified_Nanoarchaeota:10|Unclassified_Candidatus_Parvarchaeota:10|Halobacteria:…	Methanomicrobia:286|Halobacteria:273|Thermoprotei:255|Methanobacteria:253|Unclassified_Nitrososphaerota:202|Unclassified_Archaea:95|Unclassified_Euryarchaeota:90|Thermococci:85|Thermoplasmata:58|Nitrososphaeria:51|Unclassified_Thermoproteota:42|Unclassified_Candidatus_Bathyarchaeota:38|Unclassified_Candidatus_Aenigmatarchaeota:28|Unclassified_Candidatus_Woesearchaeota:23|Unclassified_Candidatus_M…	Halobacteria:376|Thermoprotei:46|Methanococci:31|Unclassified_Thermoproteota:14|Unclassified_Archaea:8|Thermoplasmata:7|Unclassified_Candidatus_Bathyarchaeota:6|Unclassified_Candidatus_Woesearchaeota:5|Unclassified_Euryarchaeota:3|Methanomicrobia:3|Unclassified_Nitrososphaerota:2|Nanohaloarchaea:2|Unclassified_Candidatus_Altiarchaeota:1|Conexivisphaeria:1|Unclassified_Candidatus_Geoarchaeota:1|Un…	Unclassified_Candidatus_Woesearchaeota:4|Unclassified_Archaea:2|Unclassified_Nanoarchaeota:1|Candidatus_Hadarchaeia:1	-
M00120|Coenzyme_A_biosynthesis_pantothenate_=>_CoA	12	5	1037	1845	89	7	0	K00867,K03525,K01947,K09680:135.83,47.47,504.17,96.53|K01922,K21977,K13038:138.47,214.37,255.23|K01598,K13038:190.37,255.23|K02318,K00954,K02201:327.60,83.23,211.37|K02318,K00859:327.60,61.57	Methanobacteria:150|Unclassified_Nitrososphaerota:142|Unclassified_Archaea:135|Unclassified_Euryarchaeota:102|Thermoprotei:63|Unclassified_Thermoproteota:54|Halobacteria:44|Unclassified_Candidatus_Micrarchaeota:42|Unclassified_Candidatus_Aenigmatarchaeota:41|Unclassified_Candidatus_Woesearchaeota:30|Methanomicrobia:28|Unclassified_Candidatus_Bathyarchaeota:28|Thermoplasmata:22|Candidatus_Poseidon…	Halobacteria:614|Methanomicrobia:285|Thermoprotei:248|Unclassified_Nitrososphaerota:121|Methanobacteria:106|Unclassified_Euryarchaeota:56|Unclassified_Archaea:54|Thermoplasmata:54|Methanococci:45|Nitrososphaeria:41|Unclassified_Thermoproteota:35|Archaeoglobi:29|Thermococci:27|Unclassified_Candidatus_Bathyarchaeota:24|Unclassified_Candidatus_Marsarchaeota:10|Unclassified_Candidatus_Woesearchaeota:…	Thermococci:58|Thermoplasmata:12|Methanomicrobia:10|Unclassified_Candidatus_Lokiarchaeota:2|Methanonatronarchaeia:1|Methanobacteria:1|Unclassified_Nitrososphaerota:1|Unclassified_Candidatus_Heimdallarchaeota:1|Unclassified_Candidatus_Woesearchaeota:1|Unclassified_Candidatus_Korarchaeota:1|Unclassified_Archaea:1	Unclassified_Archaea:3|Unclassified_Candidatus_Woesearchaeota:3|Unclassified_Candidatus_Diapherotrites:1	-
M00541|Benzoyl-CoA_degradation_benzoyl-CoA_=>_3-hydroxypimeloyl-CoA	9	4	2926	33	12	7	0	K04112+K04113+K04114+K04115,K19515+K19516:342.80+339.50+403.93+289.57,1326.63+309.80|K07537:301.87|K07538:500.77|K07539:614.93	Halobacteria:658|Methanomicrobia:323|Thermoprotei:311|Unclassified_Nitrososphaerota:263|Methanobacteria:257|Unclassified_Archaea:193|Unclassified_Euryarchaeota:156|Unclassified_Thermoproteota:87|Thermococci:86|Thermoplasmata:80|Nitrososphaeria:57|Unclassified_Candidatus_Micrarchaeota:48|Unclassified_Candidatus_Bathyarchaeota:45|Methanococci:45|Unclassified_Candidatus_Woesearchaeota:43|Unclassifie…	Archaeoglobi:14|Unclassified_Candidatus_Bathyarchaeota:6|Unclassified_Euryarchaeota:2|Unclassified_Candidatus_Heimdallarchaeota:2|Thermoplasmata:2|Unclassified_Candidatus_Lokiarchaeota:1|Unclassified_Nitrososphaerota:1|Unclassified_Candidatus_Hydrothermarchaeota:1|Theionarchaea:1|Unclassified_Candidatus_Geothermarchaeota:1|Unclassified_Thermoproteota:1|Unclassified_Candidatus_Micrarchaeota:1	Archaeoglobi:9|Unclassified_Candidatus_Lokiarchaeota:1|Unclassified_Thermoproteota:1|Unclassified_Candidatus_Bathyarchaeota:1	Thermoplasmata:6|Unclassified_Candidatus_Heimdallarchaeota:1	-
M00046|Pyrimidine_degradation_uracil_=>_beta-alanine_thymine_=>_3-aminoisobutanoate	6	3	2629	273	70	6	0	K00207,K17722+K17723:419.90,462.40+439.77|K01464:407.57|K01431,K06016:281.93,474.97	Halobacteria:397|Methanomicrobia:302|Thermoprotei:296|Methanobacteria:257|Unclassified_Nitrososphaerota:253|Unclassified_Archaea:191|Unclassified_Euryarchaeota:156|Unclassified_Thermoproteota:88|Thermococci:86|Thermoplasmata:82|Nitrososphaeria:57|Unclassified_Candidatus_Micrarchaeota:49|Unclassified_Candidatus_Bathyarchaeota:48|Methanococci:45|Unclassified_Candidatus_Woesearchaeota:43|Unclassifie…	Halobacteria:210|Methanomicrobia:21|Thermoprotei:15|Unclassified_Nitrososphaerota:7|Thermoplasmata:6|Candidatus_Methanofastidiosa:3|Unclassified_Candidatus_Bathyarchaeota:2|Unclassified_Euryarchaeota:2|Hadesarchaea:2|Unclassified_Archaea:1|Archaeoglobi:1|Theionarchaea:1|Candidatus_Methanomethylicia:1|Unclassified_Thermoproteota:1	Halobacteria:51|Unclassified_Candidatus_Verstraetearchaeota:4|Candidatus_Methanofastidiosa:4|Unclassified_Nitrososphaerota:4|Unclassified_Candidatus_Bathyarchaeota:2|Unclassified_Candidatus_Heimdallarchaeota:2|Unclassified_Archaea:1|Hadesarchaea:1|Candidatus_Bathyarchaeia:1	Unclassified_Candidatus_Thorarchaeota:4|Unclassified_Candidatus_Heimdallarchaeota:1|Theionarchaea:1	-
M00096|C5_isoprenoid_biosynthesis_non-mevalonate_pathway	9	8	1961	1006	5	6	0	K01662:352.73|K00099:225.80|K00991,K12506:233.77,317.87|K00919:103.07|K01770,K12506:239.20,317.87|K03526:74.80|K03527:42.47|K01823:45.03	Methanomicrobia:317|Thermoprotei:311|Methanobacteria:257|Unclassified_Archaea:158|Unclassified_Nitrososphaerota:133|Unclassified_Euryarchaeota:121|Thermococci:85|Thermoplasmata:78|Unclassified_Thermoproteota:63|Methanococci:45|Unclassified_Candidatus_Bathyarchaeota:42|Archaeoglobi:37|Nitrososphaeria:29|Halobacteria:29|Unclassified_Candidatus_Parvarchaeota:27|Unclassified_Candidatus_Micrarchaeota:…	Halobacteria:629|Unclassified_Nitrososphaerota:131|Unclassified_Euryarchaeota:36|Unclassified_Archaea:33|Nitrososphaeria:28|Unclassified_Thermoproteota:26|Unclassified_Candidatus_Aenigmatarchaeota:19|Candidatus_Poseidoniia:19|Unclassified_Candidatus_Micrarchaeota:18|Unclassified_Candidatus_Woesearchaeota:16|Unclassified_Candidatus_Marsarchaeota:11|Unclassified_Candidatus_Bathyarchaeota:10|Thermop…	Unclassified_Candidatus_Micrarchaeota:3|Unclassified_Candidatus_Woesearchaeota:1|Unclassified_Candidatus_Diapherotrites:1	Unclassified_Archaea:2|Unclassified_Candidatus_Woesearchaeota:1|Unclassified_Euryarchaeota:1|Unclassified_Candidatus_Diapherotrites:1|Unclassified_Candidatus_Micrarchaeota:1	-
M00036|Leucine_degradation_leucine_=>_acetoacetate_+_acetyl-CoA	13	6	752	2082	139	5	0	K00826:171.70|K00166+K00167+K09699+K00382,K11381+K09699+K00382:423.70+466.50+431.03+457.27,506.83+431.03+457.27|K00253,K00249:497.13,386.47|K01968+K01969:987.97+767.33|K05607,K13766:402.00,275.27|K01640:137.20	Unclassified_Archaea:115|Thermoprotei:108|Thermococci:86|Unclassified_Nitrososphaerota:71|Unclassified_Euryarchaeota:68|Unclassified_Thermoproteota:36|Unclassified_Candidatus_Aenigmatarchaeota:35|Methanomicrobia:30|Unclassified_Candidatus_Woesearchaeota:29|Unclassified_Candidatus_Parvarchaeota:26|Unclassified_Candidatus_Micrarchaeota:18|Methanobacteria:18|Unclassified_Nanoarchaeota:17|Unclassifie…	Halobacteria:567|Methanomicrobia:293|Methanobacteria:239|Thermoprotei:202|Unclassified_Nitrososphaerota:189|Unclassified_Archaea:75|Unclassified_Euryarchaeota:69|Thermoplasmata:67|Nitrososphaeria:54|Unclassified_Thermoproteota:52|Methanococci:45|Archaeoglobi:36|Unclassified_Candidatus_Bathyarchaeota:36|Unclassified_Candidatus_Micrarchaeota:31|Unclassified_Candidatus_Altiarchaeota:14|Unclassified_…	Halobacteria:89|Unclassified_Euryarchaeota:19|Candidatus_Poseidoniia:7|Unclassified_Candidatus_Marsarchaeota:7|Thermoplasmata:5|Unclassified_Nitrososphaerota:4|Unclassified_Archaea:3|Unclassified_Thermoproteota:1|Unclassified_Candidatus_Geoarchaeota:1|Theionarchaea:1|Thermoprotei:1|Unclassified_Candidatus_Heimdallarchaeota:1	Unclassified_Euryarchaeota:2|Unclassified_Candidatus_Heimdallarchaeota:1|Candidatus_Poseidoniia:1|Thermoplasmata:1	-
M00034|Methionine_salvage_pathway	20	11	367	2245	363	3	0	K00789:18.20|K01611:16.13|K00797:101.00|K01243,K01244,K00772,K05810:108.07,239.17,286.43,54.00|K00899,K00772,K05810:322.03,286.43,54.00|K08963:273.73|K16054,K08964:439.90,127.17|K16054,K09880,K08965:439.90,90.63,412.27|K16054,K09880,K08966:439.90,90.63,135.23|K08967:80.13|K00815,K08969,K23977,K00832,K00838:364.83,545.73,625.03,553.30,436.93	Unclassified_Archaea:81|Unclassified_Euryarchaeota:69|Unclassified_Nitrososphaerota:37|Halobacteria:27|Unclassified_Candidatus_Aenigmatarchaeota:22|Unclassified_Thermoproteota:20|Candidatus_Poseidoniia:18|Thermoplasmata:15|Unclassified_Nanoarchaeota:11|Unclassified_Candidatus_Woesearchaeota:10|Methanomicrobia:10|Unclassified_Candidatus_Micrarchaeota:8|Unclassified_Candidatus_Parvarchaeota:7|Nitro…	Halobacteria:631|Methanomicrobia:313|Methanobacteria:255|Unclassified_Nitrososphaerota:224|Unclassified_Archaea:104|Thermoprotei:92|Unclassified_Euryarchaeota:89|Unclassified_Thermoproteota:61|Thermoplasmata:57|Unclassified_Candidatus_Bathyarchaeota:48|Nitrososphaeria:47|Methanococci:45|Unclassified_Candidatus_Micrarchaeota:40|Unclassified_Candidatus_Woesearchaeota:33|Archaeoglobi:27|Unclassified…	Thermoprotei:218|Thermococci:81|Thermoplasmata:13|Archaeoglobi:9|Unclassified_Archaea:8|Unclassified_Thermoproteota:8|Unclassified_Candidatus_Verstraetearchaeota:5|Unclassified_Candidatus_Marsarchaeota:5|Unclassified_Candidatus_Thermoplasmatota:3|Unclassified_Nitrososphaerota:3|Nitrososphaeria:3|Candidatus_Methanomethylicia:2|Unclassified_Candidatus_Lokiarchaeota:2|Conexivisphaeria:1|Unclassified…	Thermoplasmata:3	-
M00083|Fatty_acid_biosynthesis_elongation	14	4	1557	1394	25	2	0	K00665,K00667,K11533,K00647,K09458:878.23,1423.90,2539.83,372.93,478.87|K00665,K00668,K11533,K00059:878.23,1595.60,2539.83,273.00|K00665,K11533,K02372,K01716,K16363:878.23,2539.83,73.03,151.67,406.83|K00665,K11533,K00208,K02371,K10780,K00209:878.23,2539.83,263.07,363.47,261.87,139.90	Methanomicrobia:215|Methanobacteria:164|Unclassified_Archaea:152|Unclassified_Nitrososphaerota:151|Unclassified_Euryarchaeota:126|Thermoprotei:118|Unclassified_Thermoproteota:73|Thermococci:55|Thermoplasmata:54|Halobacteria:50|Methanococci:45|Unclassified_Candidatus_Micrarchaeota:42|Unclassified_Candidatus_Woesearchaeota:39|Unclassified_Candidatus_Bathyarchaeota:34|Unclassified_Candidatus_Aenigma…	Halobacteria:593|Thermoprotei:193|Unclassified_Nitrososphaerota:113|Methanomicrobia:107|Methanobacteria:93|Unclassified_Archaea:36|Nitrososphaeria:36|Thermoplasmata:34|Thermococci:31|Unclassified_Euryarchaeota:30|Unclassified_Candidatus_Bathyarchaeota:18|Unclassified_Thermoproteota:16|Archaeoglobi:10|Unclassified_Candidatus_Aenigmatarchaeota:8|Unclassified_Candidatus_Micrarchaeota:7|Unclassified_…	Halobacteria:15|Unclassified_Archaea:4|Candidatus_Methanoliparia:2|Methanomicrobia:1|Unclassified_Euryarchaeota:1|Unclassified_Candidatus_Thorarchaeota:1|Nitrososphaeria:1	Unclassified_Archaea:1|Unclassified_Euryarchaeota:1	-
M00172|C4-dicarboxylic_acid_cycle_NADP_-_malic_enzyme_type	4	4	1317	953	707	1	0	K01595:46.33|K00051:665.90|K00029:306.00|K01006:374.83	Methanobacteria:210|Unclassified_Archaea:140|Unclassified_Euryarchaeota:133|Methanomicrobia:119|Unclassified_Nitrososphaerota:107|Thermoprotei:57|Thermococci:47|Thermoplasmata:44|Methanococci:43|Unclassified_Candidatus_Aenigmatarchaeota:41|Unclassified_Thermoproteota:40|Unclassified_Candidatus_Bathyarchaeota:39|Unclassified_Candidatus_Micrarchaeota:38|Unclassified_Candidatus_Woesearchaeota:27|Unc…	Thermoprotei:214|Unclassified_Nitrososphaerota:145|Halobacteria:119|Methanomicrobia:91|Unclassified_Archaea:46|Methanobacteria:46|Unclassified_Thermoproteota:43|Thermoplasmata:42|Thermococci:39|Nitrososphaeria:35|Unclassified_Euryarchaeota:23|Archaeoglobi:18|Unclassified_Candidatus_Bathyarchaeota:12|Unclassified_Candidatus_Woesearchaeota:12|Unclassified_Candidatus_Micrarchaeota:11|Unclassified_Ca…	Halobacteria:516|Methanomicrobia:113|Thermoprotei:40|Unclassified_Nitrososphaerota:11|Unclassified_Archaea:7|Unclassified_Thermoproteota:6|Unclassified_Candidatus_Woesearchaeota:4|Thermoplasmata:2|Unclassified_Euryarchaeota:2|Unclassified_Candidatus_Heimdallarchaeota:2|Unclassified_Candidatus_Bathyarchaeota:1|Candidatus_Bathyarchaeia:1|Unclassified_Candidatus_Geoarchaeota:1|Methanobacteria:1	Unclassified_Nitrososphaerota:1	-
M00377|Reductive_acetyl-CoA_pathway_(Wood-Ljungdahl_pathway)	12	7	1420	1415	142	1	0	K00198:371.20|K05299,K22015+K25123+K25124:1198.60,869.43+641.53+200.20|K01938:879.67|K01491:410.60|K00297:196.27|K15023:269.63|K14138+K00197+K00194:966.03+334.03+275.80	Thermoprotei:303|Methanobacteria:203|Unclassified_Nitrososphaerota:156|Unclassified_Archaea:150|Unclassified_Euryarchaeota:74|Unclassified_Thermoproteota:62|Thermococci:61|Thermoplasmata:51|Unclassified_Candidatus_Micrarchaeota:47|Halobacteria:45|Unclassified_Candidatus_Aenigmatarchaeota:40|Unclassified_Candidatus_Woesearchaeota:32|Nitrososphaeria:26|Unclassified_Candidatus_Parvarchaeota:25|Uncla…	Halobacteria:613|Methanomicrobia:182|Unclassified_Nitrososphaerota:108|Unclassified_Euryarchaeota:82|Methanobacteria:54|Methanococci:45|Unclassified_Archaea:42|Unclassified_Candidatus_Bathyarchaeota:31|Nitrososphaeria:31|Archaeoglobi:30|Unclassified_Thermoproteota:27|Thermoplasmata:26|Thermococci:25|Unclassified_Candidatus_Altiarchaeota:15|Candidatus_Poseidoniia:14|Unclassified_Candidatus_Woesear…	Methanomicrobia:129|Thermoplasmata:10|Unclassified_Euryarchaeota:2|Unclassified_Archaea:1	Thermoplasmata:1	-
M00923|UDP-L-FucNAm_biosynthesis	4	4	2599	371	7	1	0	K15894:309.63|K19068:232.17|K24258:587.60|K24259:656.90	Halobacteria:596|Thermoprotei:311|Methanomicrobia:253|Methanobacteria:182|Unclassified_Nitrososphaerota:182|Unclassified_Archaea:181|Unclassified_Euryarchaeota:148|Unclassified_Thermoproteota:85|Thermoplasmata:82|Thermococci:82|Unclassified_Candidatus_Bathyarchaeota:51|Unclassified_Candidatus_Micrarchaeota:46|Nitrososphaeria:41|Unclassified_Candidatus_Woesearchaeota:40|Methanococci:38|Archaeoglob…	Unclassified_Nitrososphaerota:82|Methanobacteria:75|Methanomicrobia:63|Halobacteria:62|Nitrososphaeria:16|Unclassified_Archaea:11|Unclassified_Euryarchaeota:10|Methanococci:7|Unclassified_Candidatus_Altiarchaeota:7|Thermoplasmata:6|Unclassified_Candidatus_Aenigmatarchaeota:4|Unclassified_Thermoproteota:4|Thermococci:4|Candidatus_Methanofastidiosa:3|Unclassified_Candidatus_Woesearchaeota:3|Unclass…	Methanomicrobia:6|Unclassified_Archaea:1	Methanomicrobia:1	-
M00038|Tryptophan_metabolism_tryptophan_=>_kynurenine_=>_2-aminomuconate	11	7	1424	1549	4	1	0	K00453,K00463:71.30,121.33|K01432,K14263,K07130:151.47,157.43,116.73|K00486:337.43|K01556:176.33|K00452:67.17|K03392:238.37|K10217,K23234:687.93,730.00	Methanobacteria:161|Thermoprotei:148|Unclassified_Archaea:146|Halobacteria:143|Unclassified_Nitrososphaerota:142|Unclassified_Euryarchaeota:120|Methanomicrobia:76|Unclassified_Thermoproteota:60|Thermoplasmata:50|Unclassified_Candidatus_Woesearchaeota:42|Unclassified_Candidatus_Micrarchaeota:35|Unclassified_Candidatus_Aenigmatarchaeota:33|Archaeoglobi:26|Unclassified_Candidatus_Bathyarchaeota:26|U…	Halobacteria:512|Methanomicrobia:247|Thermoprotei:163|Unclassified_Nitrososphaerota:122|Methanobacteria:96|Thermococci:79|Unclassified_Archaea:47|Unclassified_Euryarchaeota:38|Thermoplasmata:38|Nitrososphaeria:36|Unclassified_Thermoproteota:29|Unclassified_Candidatus_Bathyarchaeota:26|Methanococci:20|Candidatus_Poseidoniia:17|Unclassified_Candidatus_Micrarchaeota:14|Archaeoglobi:12|Unclassified_C…	Halobacteria:3|Unclassified_Candidatus_Heimdallarchaeota:1	Unclassified_Candidatus_Heimdallarchaeota:1	-
M00642|Multidrug_resistance_efflux_pump_MexJK-OprM	3	2	2977	0	0	1	0	K18301:168.13|K18302+K18303:347.53+1327.87	Halobacteria:658|Methanomicrobia:323|Thermoprotei:311|Unclassified_Nitrososphaerota:263|Methanobacteria:257|Unclassified_Archaea:193|Unclassified_Euryarchaeota:158|Unclassified_Thermoproteota:89|Thermoplasmata:88|Thermococci:86|Nitrososphaeria:57|Unclassified_Candidatus_Bathyarchaeota:52|Unclassified_Candidatus_Micrarchaeota:49|Methanococci:45|Unclassified_Candidatus_Woesearchaeota:43|Unclassifie…	-	-	Unclassified_Nitrososphaerota:1	-
M00017|Methionine_biosynthesis_aspartate_=>_homoserine_=>_methionine	13	7	543	1090	1345	0	0	K00928,K12524,K12525:352.37,750.40,770.90|K00133:218.23|K00003,K12524,K12525:287.93,750.40,770.90|K00651,K00641:242.27,85.57|K01739:453.70|K01760,K14155:468.20,290.03|K00548,K24042,K00549:290.37,396.77,37.90	Unclassified_Archaea:118|Unclassified_Euryarchaeota:78|Unclassified_Candidatus_Micrarchaeota:40|Unclassified_Candidatus_Aenigmatarchaeota:40|Unclassified_Candidatus_Woesearchaeota:34|Unclassified_Nitrososphaerota:34|Unclassified_Thermoproteota:27|Unclassified_Candidatus_Parvarchaeota:26|Thermoplasmata:25|Thermoprotei:23|Unclassified_Nanoarchaeota:16|Candidatus_Poseidoniia:15|Unclassified_Candidat…	Thermoprotei:288|Unclassified_Nitrososphaerota:152|Halobacteria:95|Thermococci:83|Unclassified_Euryarchaeota:63|Unclassified_Archaea:60|Methanomicrobia:55|Unclassified_Thermoproteota:51|Thermoplasmata:48|Unclassified_Candidatus_Bathyarchaeota:38|Nitrososphaeria:24|Unclassified_Candidatus_Altiarchaeota:15|Methanobacteria:14|Unclassified_Candidatus_Marsarchaeota:12|Archaeoglobi:12|Unclassified_Cand…	Halobacteria:559|Methanomicrobia:264|Methanobacteria:243|Unclassified_Nitrososphaerota:78|Methanococci:45|Nitrososphaeria:31|Archaeoglobi:24|Unclassified_Euryarchaeota:17|Thermoplasmata:15|Unclassified_Archaea:15|Unclassified_Thermoproteota:11|Unclassified_Candidatus_Bathyarchaeota:8|Candidatus_Methanoliparia:5|Unclassified_Candidatus_Verstraetearchaeota:4|Candidatus_Methanofastidiosa:3|Unclassif…	-	-
M00525|Lysine_biosynthesis_acetyl-DAP_pathway_aspartate_=>_lysine	9	9	712	1221	1045	0	0	K00928:352.37|K00133:218.23|K01714:258.37|K00215:136.13|K05822:339.07|K00841:489.30|K05823:359.00|K01778:65.70|K01586:305.00	Unclassified_Archaea:118|Unclassified_Euryarchaeota:101|Unclassified_Nitrososphaerota:84|Thermoprotei:53|Thermoplasmata:45|Unclassified_Candidatus_Aenigmatarchaeota:40|Unclassified_Thermoproteota:40|Unclassified_Candidatus_Micrarchaeota:39|Unclassified_Candidatus_Woesearchaeota:35|Unclassified_Candidatus_Parvarchaeota:27|Thermococci:25|Candidatus_Poseidoniia:23|Unclassified_Nanoarchaeota:16|Uncla…	Halobacteria:273|Thermoprotei:258|Unclassified_Nitrososphaerota:180|Unclassified_Archaea:69|Thermococci:61|Nitrososphaeria:49|Methanobacteria:44|Unclassified_Thermoproteota:43|Unclassified_Euryarchaeota:41|Methanomicrobia:34|Unclassified_Candidatus_Bathyarchaeota:34|Thermoplasmata:22|Unclassified_Candidatus_Marsarchaeota:12|Archaeoglobi:11|Unclassified_Candidatus_Micrarchaeota:10|Candidatus_Metha…	Halobacteria:380|Methanomicrobia:288|Methanobacteria:213|Methanococci:45|Archaeoglobi:26|Thermoplasmata:21|Unclassified_Euryarchaeota:16|Unclassified_Candidatus_Altiarchaeota:11|Unclassified_Candidatus_Bathyarchaeota:8|Unclassified_Archaea:6|Unclassified_Thermoproteota:6|Candidatus_Methanoliparia:4|Unclassified_Candidatus_Lokiarchaeota:3|Hadesarchaea:3|Methanonatronarchaeia:3|Methanopyri:3|Unclas…	-	-
M00882|Lipoic_acid_biosynthesis_eukaryotes_octanoyl-ACP_=>_dihydrolipoyl-H	2	2	2057	0	921	0	0	K23735:270.37|K03644:131.40	Methanomicrobia:311|Methanobacteria:257|Unclassified_Nitrososphaerota:243|Thermoprotei:186|Unclassified_Archaea:170|Unclassified_Euryarchaeota:125|Thermococci:85|Unclassified_Thermoproteota:79|Halobacteria:65|Nitrososphaeria:51|Unclassified_Candidatus_Bathyarchaeota:51|Thermoplasmata:47|Methanococci:45|Unclassified_Candidatus_Micrarchaeota:42|Unclassified_Candidatus_Aenigmatarchaeota:41|Unclassif…	-	Halobacteria:593|Thermoprotei:125|Thermoplasmata:41|Unclassified_Euryarchaeota:33|Unclassified_Archaea:23|Unclassified_Nitrososphaerota:21|Candidatus_Poseidoniia:18|Unclassified_Candidatus_Marsarchaeota:12|Methanomicrobia:12|Unclassified_Thermoproteota:10|Unclassified_Candidatus_Micrarchaeota:7|Nitrososphaeria:6|Unclassified_Candidatus_Woesearchaeota:5|Unclassified_Candidatus_Geoarchaeota:4|Uncla…	-	-
M00884|Lipoic_acid_biosynthesis_octanoyl-CoA_=>_dihydrolipoyl-E2	2	2	2057	0	921	0	0	K23750:373.17|K03644:131.40	Methanomicrobia:311|Methanobacteria:257|Unclassified_Nitrososphaerota:243|Thermoprotei:186|Unclassified_Archaea:170|Unclassified_Euryarchaeota:125|Thermococci:85|Unclassified_Thermoproteota:79|Halobacteria:65|Nitrososphaeria:51|Unclassified_Candidatus_Bathyarchaeota:51|Thermoplasmata:47|Methanococci:45|Unclassified_Candidatus_Micrarchaeota:42|Unclassified_Candidatus_Aenigmatarchaeota:41|Unclassif…	-	Halobacteria:593|Thermoprotei:125|Thermoplasmata:41|Unclassified_Euryarchaeota:33|Unclassified_Archaea:23|Unclassified_Nitrososphaerota:21|Candidatus_Poseidoniia:18|Unclassified_Candidatus_Marsarchaeota:12|Methanomicrobia:12|Unclassified_Thermoproteota:10|Unclassified_Candidatus_Micrarchaeota:7|Nitrososphaeria:6|Unclassified_Candidatus_Woesearchaeota:5|Unclassified_Candidatus_Geoarchaeota:4|Uncla…	-	-
M00845|Arginine_biosynthesis_glutamate_=>_acetylcitrulline_=>_arginine	7	7	787	1549	642	0	0	K22478:518.53|K00145:124.50|K00821:499.57|K09065:411.53|K01438:291.07|K01940:125.93|K01755:178.73	Unclassified_Archaea:126|Unclassified_Euryarchaeota:100|Thermococci:71|Unclassified_Nitrososphaerota:66|Thermoprotei:55|Unclassified_Thermoproteota:50|Thermoplasmata:42|Unclassified_Candidatus_Micrarchaeota:38|Unclassified_Candidatus_Aenigmatarchaeota:37|Unclassified_Candidatus_Woesearchaeota:34|Unclassified_Candidatus_Parvarchaeota:27|Candidatus_Poseidoniia:23|Unclassified_Nanoarchaeota:17|Uncla…	Halobacteria:638|Thermoprotei:256|Unclassified_Nitrososphaerota:198|Unclassified_Archaea:63|Methanomicrobia:53|Nitrososphaeria:49|Methanobacteria:44|Unclassified_Thermoproteota:39|Unclassified_Euryarchaeota:36|Unclassified_Candidatus_Bathyarchaeota:36|Thermoplasmata:29|Thermococci:15|Unclassified_Candidatus_Altiarchaeota:11|Unclassified_Candidatus_Micrarchaeota:10|Unclassified_Candidatus_Marsarch…	Methanomicrobia:265|Methanobacteria:213|Methanococci:45|Archaeoglobi:25|Unclassified_Euryarchaeota:22|Thermoplasmata:17|Halobacteria:13|Unclassified_Candidatus_Altiarchaeota:7|Hadesarchaea:6|Candidatus_Methanofastidiosa:5|Unclassified_Archaea:4|Candidatus_Methanoliparia:4|Methanopyri:3|Unclassified_Candidatus_Woesearchaeota:2|Unclassified_Candidatus_Aenigmatarchaeota:2|Methanonatronarchaeia:2|Unc…	-	-
M00116|Menaquinone_biosynthesis_chorismate_(+_polyprenyl-PP)_=>_menaquinol	9	9	2041	334	603	0	0	K02552:364.87|K02551:338.50|K08680:240.53|K02549:215.80|K01911:345.03|K01661:394.10|K19222:82.43|K02548:201.33|K03183:260.07	Methanomicrobia:302|Thermoprotei:269|Methanobacteria:257|Unclassified_Nitrososphaerota:216|Unclassified_Archaea:166|Unclassified_Euryarchaeota:134|Thermococci:86|Unclassified_Thermoproteota:68|Thermoplasmata:52|Unclassified_Candidatus_Micrarchaeota:47|Unclassified_Candidatus_Bathyarchaeota:45|Methanococci:45|Unclassified_Candidatus_Woesearchaeota:42|Unclassified_Candidatus_Aenigmatarchaeota:41|Ni…	Halobacteria:49|Unclassified_Nitrososphaerota:48|Thermoprotei:42|Thermoplasmata:36|Unclassified_Archaea:24|Unclassified_Euryarchaeota:24|Unclassified_Thermoproteota:21|Methanomicrobia:21|Nitrososphaeria:19|Unclassified_Candidatus_Marsarchaeota:8|Unclassified_Candidatus_Bathyarchaeota:7|Unclassified_Candidatus_Geoarchaeota:5|Unclassified_Candidatus_Korarchaeota:5|Unclassified_Candidatus_Geothermar…	Halobacteria:599|Unclassified_Archaea:3|Unclassified_Candidatus_Heimdallarchaeota:1	-	-
M00612|Anoxygenic_photosynthesis_in_purple_bacteria	20	12	209	2218	551	0	0	K08928+K08929:328.17+396.07|K00855:159.50|K01601:330.63|K00927:204.47|K05298,K00150,K00134:662.57,334.77,425.43|K01803:29.33|K01623,K01624:34.20,96.33|K03841,K02446,K11532,K01086:213.93,473.30,482.13,582.87|K00615:206.03|K01100,K11532,K01086:343.13,482.13,582.87|K01807,K01808:51.03,179.10|K01783:256.80	Unclassified_Archaea:43|Unclassified_Euryarchaeota:35|Unclassified_Nitrososphaerota:27|Unclassified_Candidatus_Micrarchaeota:22|Unclassified_Thermoproteota:16|Unclassified_Candidatus_Aenigmatarchaeota:14|Thermoplasmata:6|Unclassified_Nanoarchaeota:6|Unclassified_Candidatus_Parvarchaeota:5|Methanomicrobia:4|Unclassified_Candidatus_Woesearchaeota:4|Candidatus_Micrarchaeia:4|Thermoprotei:4|Nitrososp…	Halobacteria:432|Thermoprotei:304|Methanobacteria:257|Unclassified_Nitrososphaerota:234|Methanomicrobia:191|Unclassified_Archaea:142|Unclassified_Euryarchaeota:93|Thermococci:84|Unclassified_Thermoproteota:72|Nitrososphaeria:54|Thermoplasmata:43|Unclassified_Candidatus_Bathyarchaeota:39|Unclassified_Candidatus_Woesearchaeota:33|Archaeoglobi:28|Unclassified_Candidatus_Aenigmatarchaeota:27|Unclassi…	Halobacteria:226|Methanomicrobia:128|Methanococci:44|Thermoplasmata:39|Unclassified_Euryarchaeota:30|Unclassified_Candidatus_Bathyarchaeota:12|Archaeoglobi:8|Unclassified_Archaea:8|Unclassified_Candidatus_Micrarchaeota:7|Unclassified_Candidatus_Woesearchaeota:6|Unclassified_Candidatus_Marsarchaeota:6|Unclassified_Candidatus_Lokiarchaeota:5|Unclassified_Candidatus_Thermoplasmatota:4|Candidatus_Met…	-	-
M00165|Reductive_pentose_phosphate_cycle_(Calvin_cycle)	18	11	209	2219	550	0	0	K00855:159.50|K01601:330.63|K00927:204.47|K05298,K00150,K00134:662.57,334.77,425.43|K01803:29.33|K01623,K01624:34.20,96.33|K03841,K02446,K11532,K01086:213.93,473.30,482.13,582.87|K00615:206.03|K01100,K11532,K01086:343.13,482.13,582.87|K01807,K01808:51.03,179.10|K01783:256.80	Unclassified_Archaea:43|Unclassified_Euryarchaeota:35|Unclassified_Nitrososphaerota:27|Unclassified_Candidatus_Micrarchaeota:22|Unclassified_Thermoproteota:16|Unclassified_Candidatus_Aenigmatarchaeota:14|Thermoplasmata:6|Unclassified_Nanoarchaeota:6|Unclassified_Candidatus_Parvarchaeota:5|Methanomicrobia:4|Unclassified_Candidatus_Woesearchaeota:4|Candidatus_Micrarchaeia:4|Thermoprotei:4|Nitrososp…	Halobacteria:432|Thermoprotei:304|Methanobacteria:257|Unclassified_Nitrososphaerota:234|Methanomicrobia:191|Unclassified_Archaea:142|Unclassified_Euryarchaeota:94|Thermococci:84|Unclassified_Thermoproteota:72|Nitrososphaeria:54|Thermoplasmata:43|Unclassified_Candidatus_Bathyarchaeota:39|Unclassified_Candidatus_Woesearchaeota:33|Archaeoglobi:28|Unclassified_Candidatus_Aenigmatarchaeota:27|Unclassi…	Halobacteria:226|Methanomicrobia:128|Methanococci:44|Thermoplasmata:39|Unclassified_Euryarchaeota:29|Unclassified_Candidatus_Bathyarchaeota:12|Archaeoglobi:8|Unclassified_Archaea:8|Unclassified_Candidatus_Micrarchaeota:7|Unclassified_Candidatus_Woesearchaeota:6|Unclassified_Candidatus_Marsarchaeota:6|Unclassified_Candidatus_Lokiarchaeota:5|Unclassified_Candidatus_Thermoplasmatota:4|Candidatus_Met…	-	-
M00932|Phylloquinone_biosynthesis_chorismate_(+_phytyl-PP)_=>_phylloquinol	13	10	2224	218	536	0	0	K02552,K14759:364.87,1343.37|K02551,K14759:338.50,1343.37|K08680,K14759:240.53,1343.37|K02549,K14759:215.80,1343.37|K01911,K14760:345.03,388.10|K01661:394.10|K19222,K12073:82.43,121.47|K23094:164.97|K17872:350.13|K23095:244.83	Methanomicrobia:323|Thermoprotei:277|Unclassified_Nitrososphaerota:264|Methanobacteria:257|Unclassified_Archaea:180|Unclassified_Euryarchaeota:153|Thermococci:86|Unclassified_Thermoproteota:81|Thermoplasmata:70|Nitrososphaeria:57|Unclassified_Candidatus_Bathyarchaeota:51|Unclassified_Candidatus_Micrarchaeota:49|Methanococci:45|Unclassified_Candidatus_Woesearchaeota:43|Unclassified_Candidatus_Aeni…	Halobacteria:112|Thermoprotei:34|Thermoplasmata:18|Unclassified_Archaea:12|Unclassified_Thermoproteota:8|Unclassified_Candidatus_Marsarchaeota:8|Unclassified_Euryarchaeota:5|Unclassified_Candidatus_Korarchaeota:5|Unclassified_Candidatus_Geothermarchaeota:4|Unclassified_Candidatus_Heimdallarchaeota:3|Theionarchaea:2|Nanohaloarchaea:2|Unclassified_Candidatus_Geoarchaeota:2|Unclassified_Candidatus_B…	Halobacteria:535|Unclassified_Archaea:1	-	-
M00842|Tetrahydrobiopterin_biosynthesis_GTP_=>_BH4	3	3	875	1582	521	0	0	K01495:53.90|K01737:23.97|K00072:208.70	Unclassified_Archaea:144|Halobacteria:101|Unclassified_Nitrososphaerota:82|Unclassified_Euryarchaeota:69|Thermoprotei:60|Unclassified_Thermoproteota:53|Unclassified_Candidatus_Micrarchaeota:45|Unclassified_Candidatus_Bathyarchaeota:45|Unclassified_Candidatus_Woesearchaeota:41|Unclassified_Candidatus_Aenigmatarchaeota:41|Archaeoglobi:19|Thermoplasmata:18|Unclassified_Nanoarchaeota:17|Methanomicrob…	Halobacteria:477|Methanomicrobia:306|Methanobacteria:249|Unclassified_Nitrososphaerota:91|Thermococci:85|Thermoplasmata:62|Unclassified_Euryarchaeota:55|Methanococci:44|Thermoprotei:39|Unclassified_Archaea:36|Unclassified_Thermoproteota:20|Archaeoglobi:19|Unclassified_Candidatus_Altiarchaeota:16|Unclassified_Candidatus_Parvarchaeota:11|Unclassified_Candidatus_Marsarchaeota:10|Nitrososphaeria:10|U…	Thermoprotei:212|Unclassified_Nitrososphaerota:91|Halobacteria:80|Nitrososphaeria:40|Unclassified_Euryarchaeota:34|Candidatus_Poseidoniia:16|Unclassified_Thermoproteota:16|Unclassified_Archaea:13|Thermoplasmata:8|Unclassified_Candidatus_Micrarchaeota:4|Methanomicrobia:2|Unclassified_Candidatus_Thorarchaeota:1|Unclassified_Candidatus_Heimdallarchaeota:1|Methanobacteria:1|Unclassified_Candidatus_Pa…	-	-
M00843|L-threo-Tetrahydrobiopterin_biosynthesis_GTP_=>_L-threo-BH4	3	3	875	1582	521	0	0	K01495:53.90|K01737:23.97|K17745:402.67	Unclassified_Archaea:144|Halobacteria:101|Unclassified_Nitrososphaerota:82|Unclassified_Euryarchaeota:69|Thermoprotei:60|Unclassified_Thermoproteota:53|Unclassified_Candidatus_Micrarchaeota:45|Unclassified_Candidatus_Bathyarchaeota:45|Unclassified_Candidatus_Woesearchaeota:41|Unclassified_Candidatus_Aenigmatarchaeota:41|Archaeoglobi:19|Thermoplasmata:18|Unclassified_Nanoarchaeota:17|Methanomicrob…	Halobacteria:477|Methanomicrobia:306|Methanobacteria:249|Unclassified_Nitrososphaerota:91|Thermococci:85|Thermoplasmata:62|Unclassified_Euryarchaeota:55|Methanococci:44|Thermoprotei:39|Unclassified_Archaea:36|Unclassified_Thermoproteota:20|Archaeoglobi:19|Unclassified_Candidatus_Altiarchaeota:16|Unclassified_Candidatus_Parvarchaeota:11|Unclassified_Candidatus_Marsarchaeota:10|Nitrososphaeria:10|U…	Thermoprotei:212|Unclassified_Nitrososphaerota:91|Halobacteria:80|Nitrososphaeria:40|Unclassified_Euryarchaeota:34|Candidatus_Poseidoniia:16|Unclassified_Thermoproteota:16|Unclassified_Archaea:13|Thermoplasmata:8|Unclassified_Candidatus_Micrarchaeota:4|Methanomicrobia:2|Unclassified_Candidatus_Thorarchaeota:1|Unclassified_Candidatus_Heimdallarchaeota:1|Methanobacteria:1|Unclassified_Candidatus_Pa…	-	-
M00531|Assimilatory_nitrate_reduction_nitrate_=>_ammonia	8	2	2464	1	513	0	0	K00367,K10534,K00372:1062.80,656.90,1054.10|K00366,K17877,K26139+K26138,K00361:608.00,1424.50,786.80+109.20,1789.43	Methanomicrobia:323|Thermoprotei:311|Unclassified_Nitrososphaerota:264|Methanobacteria:257|Unclassified_Archaea:189|Unclassified_Euryarchaeota:158|Halobacteria:149|Unclassified_Thermoproteota:89|Thermoplasmata:88|Thermococci:86|Nitrososphaeria:57|Unclassified_Candidatus_Bathyarchaeota:52|Unclassified_Candidatus_Micrarchaeota:49|Methanococci:45|Unclassified_Candidatus_Woesearchaeota:43|Unclassifie…	Unclassified_Archaea:1	Halobacteria:509|Unclassified_Archaea:3|Candidatus_Methanoliparia:1	-	-
M00144|NADH:quinone_oxidoreductase_prokaryotes	16	1	1530	967	481	0	0	K00330+K00331+K00332+K00333+K00334+K00335+K00336+K00337+K00338+K00339+K00340+K00341+K00342+K00343,K00330+K00331+K13378+K00334+K00335+K00336+K00337+K00338+K00339+K00340+K00341+K00342+K00343,K00330+K13380+K00334+K00335+K00336+K00337+K00338+K00339+K00340+K00341+K00342+K00343:126.53+277.27+191.67+514.80+148.93+611.13+683.03+415.47+150.03+126.37+94.67+550.80+549.70+335.10,126.53+277.27+593.37+148.93+6…	Thermoprotei:261|Methanomicrobia:229|Methanobacteria:228|Unclassified_Archaea:146|Unclassified_Nitrososphaerota:117|Unclassified_Euryarchaeota:69|Unclassified_Thermoproteota:54|Methanococci:45|Unclassified_Candidatus_Woesearchaeota:41|Unclassified_Candidatus_Aenigmatarchaeota:41|Thermococci:32|Unclassified_Candidatus_Micrarchaeota:29|Unclassified_Candidatus_Parvarchaeota:27|Thermoplasmata:27|Arch…	Halobacteria:196|Unclassified_Nitrososphaerota:146|Unclassified_Euryarchaeota:87|Methanomicrobia:85|Thermoplasmata:61|Thermococci:54|Thermoprotei:50|Unclassified_Archaea:44|Nitrososphaeria:42|Unclassified_Thermoproteota:35|Unclassified_Candidatus_Bathyarchaeota:30|Methanobacteria:29|Unclassified_Candidatus_Micrarchaeota:20|Candidatus_Poseidoniia:13|Unclassified_Candidatus_Altiarchaeota:12|Unclass…	Halobacteria:456|Methanomicrobia:9|Archaeoglobi:6|Unclassified_Archaea:3|Unclassified_Euryarchaeota:2|Unclassified_Candidatus_Altiarchaeota:1|Methanonatronarchaeia:1|Candidatus_Hydrothermarchaeia:1|Unclassified_Candidatus_Hydrothermarchaeota:1|Unclassified_Nitrososphaerota:1	-	-
M00176|Assimilatory_sulfate_reduction_sulfate_=>_H2S	11	3	2009	556	413	0	0	K13811,K00958+K00860,K00955+K00957,K00956+K00957+K00860:442.93,259.60+336.37,726.83+194.70,540.10+194.70+336.37|K00390,K05907:180.93,463.60|K00380+K00381,K00392:532.37+491.53,571.63	Halobacteria:631|Methanobacteria:257|Unclassified_Archaea:159|Unclassified_Nitrososphaerota:133|Methanomicrobia:126|Unclassified_Euryarchaeota:118|Thermoprotei:102|Unclassified_Thermoproteota:77|Thermoplasmata:57|Unclassified_Candidatus_Bathyarchaeota:37|Unclassified_Candidatus_Aenigmatarchaeota:37|Unclassified_Candidatus_Woesearchaeota:35|Unclassified_Candidatus_Micrarchaeota:28|Unclassified_Can…	Methanomicrobia:160|Thermoprotei:76|Methanococci:38|Unclassified_Euryarchaeota:35|Thermococci:34|Unclassified_Archaea:27|Archaeoglobi:26|Halobacteria:25|Thermoplasmata:24|Unclassified_Candidatus_Micrarchaeota:21|Unclassified_Nitrososphaerota:21|Unclassified_Candidatus_Bathyarchaeota:14|Unclassified_Candidatus_Marsarchaeota:10|Unclassified_Candidatus_Woesearchaeota:8|Nitrososphaeria:6|Unclassified…	Thermoprotei:133|Unclassified_Nitrososphaerota:110|Thermococci:50|Nitrososphaeria:38|Methanomicrobia:37|Unclassified_Thermoproteota:9|Thermoplasmata:7|Unclassified_Archaea:7|Unclassified_Euryarchaeota:5|Methanococci:4|Archaeoglobi:2|Candidatus_Methanoliparia:2|Halobacteria:2|Unclassified_Candidatus_Parvarchaeota:2|Unclassified_Candidatus_Lokiarchaeota:2|Unclassified_Candidatus_Bathyarchaeota:1|Un…	-	-
M00153|Cytochrome_bd_ubiquinol_oxidase	4	1	2376	208	394	0	0	K00425+K00426+K00424,K00425+K00426+K22501:69.07+36.50+33.57,69.07+36.50+73.27	Halobacteria:310|Methanomicrobia:291|Methanobacteria:257|Unclassified_Nitrososphaerota:252|Thermoprotei:207|Unclassified_Archaea:185|Unclassified_Euryarchaeota:155|Unclassified_Thermoproteota:82|Thermococci:78|Thermoplasmata:61|Nitrososphaeria:56|Unclassified_Candidatus_Bathyarchaeota:52|Methanococci:45|Unclassified_Candidatus_Woesearchaeota:43|Unclassified_Candidatus_Aenigmatarchaeota:41|Unclass…	Thermoprotei:104|Thermoplasmata:26|Unclassified_Candidatus_Parvarchaeota:12|Unclassified_Nitrososphaerota:12|Archaeoglobi:8|Unclassified_Archaea:7|Unclassified_Thermoproteota:7|Halobacteria:6|Methanomicrobia:5|Unclassified_Candidatus_Korarchaeota:5|Unclassified_Candidatus_Geoarchaeota:3|Unclassified_Euryarchaeota:2|Unclassified_Nanoarchaeota:2|Unclassified_Candidatus_Micrarchaeota:2|Candidatus_Na…	Halobacteria:342|Methanomicrobia:27|Unclassified_Candidatus_Micrarchaeota:10|Thermococci:8|Candidatus_Micrarchaeia:3|Unclassified_Candidatus_Heimdallarchaeota:1|Thermoplasmata:1|Unclassified_Euryarchaeota:1|Unclassified_Archaea:1	-	-
M00608|2-Oxocarboxylic_acid_chain_extension_2-oxoglutarate_=>_2-oxoadipate_=>_2-oxopimelate_=>_2-oxosuberate	4	3	2401	187	390	0	0	K10977:548.70|K16792+K16793:621.30+231.27|K10978:474.83	Halobacteria:658|Thermoprotei:311|Unclassified_Nitrososphaerota:264|Unclassified_Archaea:192|Unclassified_Euryarchaeota:155|Unclassified_Thermoproteota:89|Thermoplasmata:87|Thermococci:86|Nitrososphaeria:57|Unclassified_Candidatus_Bathyarchaeota:52|Unclassified_Candidatus_Micrarchaeota:49|Methanomicrobia:45|Unclassified_Candidatus_Woesearchaeota:43|Unclassified_Candidatus_Aenigmatarchaeota:41|Arc…	Methanomicrobia:129|Methanobacteria:41|Methanococci:8|Methanopyri:3|Unclassified_Euryarchaeota:3|Thermoplasmata:1|Candidatus_Methanofastidiosa:1|Unclassified_Archaea:1	Methanobacteria:204|Methanomicrobia:149|Methanococci:37	-	-
M00346|Formaldehyde_assimilation_serine_pathway	10	9	246	2344	388	0	0	K00600:83.83|K00830:405.63|K00018:321.47|K11529:184.13|K01689:70.27|K01595:46.33|K00024:371.37|K08692+K14067:467.93+613.97|K08691:392.17	Unclassified_Euryarchaeota:45|Unclassified_Archaea:44|Unclassified_Nitrososphaerota:44|Unclassified_Thermoproteota:24|Unclassified_Candidatus_Micrarchaeota:18|Unclassified_Candidatus_Aenigmatarchaeota:11|Thermoplasmata:9|Unclassified_Candidatus_Woesearchaeota:8|Methanomicrobia:6|Unclassified_Nanoarchaeota:6|Unclassified_Candidatus_Bathyarchaeota:5|Unclassified_Candidatus_Parvarchaeota:5|Nitrososp…	Methanomicrobia:312|Thermoprotei:307|Halobacteria:278|Methanobacteria:257|Unclassified_Nitrososphaerota:220|Unclassified_Archaea:148|Unclassified_Euryarchaeota:113|Thermococci:86|Thermoplasmata:79|Unclassified_Thermoproteota:65|Nitrososphaeria:53|Unclassified_Candidatus_Bathyarchaeota:45|Methanococci:45|Archaeoglobi:37|Unclassified_Candidatus_Woesearchaeota:35|Unclassified_Candidatus_Micrarchaeot…	Halobacteria:380|Methanomicrobia:5|Unclassified_Candidatus_Bathyarchaeota:2|Unclassified_Archaea:1	-	-
M00173|Reductive_citrate_cycle_(Arnon-Buchanan_cycle)	35	12	236	2393	349	0	0	K00169+K00170+K00171+K00172,K03737:290.13+313.30+100.10+151.70,427.13|K01007,K01006,K01959+K01960,K01958:390.73,374.83,742.23+765.03,829.43|K01595,K01959+K01960,K01958:46.33,742.23+765.03,829.43|K00024:371.37|K01676,K01679,K01677+K01678:353.47,654.27,305.93+225.10|K00239+K00240,K18556+K18557+K18558+K18559+K18560:651.07+140.63,780.67+364.73+586.97+795.57+299.10|K01902+K01903:361.23+499.70|K00174+K…	Unclassified_Nitrososphaerota:53|Unclassified_Euryarchaeota:43|Unclassified_Archaea:40|Unclassified_Thermoproteota:20|Unclassified_Candidatus_Aenigmatarchaeota:13|Unclassified_Candidatus_Parvarchaeota:10|Unclassified_Nanoarchaeota:9|Unclassified_Candidatus_Woesearchaeota:6|Unclassified_Candidatus_Micrarchaeota:5|Nitrososphaeria:5|Thermoplasmata:5|Thermoprotei:4|Unclassified_Candidatus_Bathyarchae…	Halobacteria:467|Thermoprotei:273|Methanobacteria:257|Unclassified_Nitrososphaerota:211|Methanomicrobia:210|Unclassified_Archaea:152|Unclassified_Euryarchaeota:115|Thermococci:86|Thermoplasmata:83|Unclassified_Thermoproteota:66|Nitrososphaeria:52|Unclassified_Candidatus_Bathyarchaeota:49|Methanococci:45|Unclassified_Candidatus_Micrarchaeota:44|Unclassified_Candidatus_Woesearchaeota:37|Archaeoglob…	Halobacteria:189|Methanomicrobia:111|Thermoprotei:34|Archaeoglobi:7|Unclassified_Thermoproteota:3|Candidatus_Poseidoniia:2|Unclassified_Archaea:1|Unclassified_Candidatus_Geoarchaeota:1|Unclassified_Candidatus_Heimdallarchaeota:1	-	-
M00433|Lysine_biosynthesis_2-oxoglutarate_=>_2-oxoadipate	6	4	2466	203	309	0	0	K01655:409.90|K17450,K16792+K16793:1201.47,621.30+231.27|K01705,K16792+K16793:587.20,621.30+231.27|K05824:422.83	Halobacteria:658|Thermoprotei:311|Unclassified_Nitrososphaerota:264|Unclassified_Archaea:191|Unclassified_Euryarchaeota:153|Methanomicrobia:130|Unclassified_Thermoproteota:88|Thermoplasmata:88|Thermococci:86|Nitrososphaeria:57|Unclassified_Candidatus_Micrarchaeota:49|Unclassified_Candidatus_Woesearchaeota:43|Unclassified_Candidatus_Aenigmatarchaeota:41|Unclassified_Candidatus_Bathyarchaeota:40|Ar…	Methanobacteria:125|Methanomicrobia:42|Unclassified_Candidatus_Bathyarchaeota:12|Methanococci:10|Unclassified_Euryarchaeota:5|Methanopyri:3|Hadesarchaea:3|Unclassified_Archaea:1|Unclassified_Thermoproteota:1|Unclassified_Candidatus_Geothermarchaeota:1	Methanomicrobia:151|Methanobacteria:125|Methanococci:32|Unclassified_Archaea:1	-	-
M00615|Nitrate_assimilation	12	3	2401	286	291	0	0	K02575,K15576+K15577+K15578:199.30,509.57+283.13+407.60|K00367,K10534,K00372:1062.80,656.90,1054.10|K00366,K17877,K26139+K26138,K00361:608.00,1424.50,786.80+109.20,1789.43	Methanomicrobia:323|Thermoprotei:272|Unclassified_Nitrososphaerota:264|Methanobacteria:257|Unclassified_Archaea:188|Unclassified_Euryarchaeota:158|Halobacteria:136|Unclassified_Thermoproteota:89|Thermoplasmata:88|Thermococci:86|Nitrososphaeria:57|Unclassified_Candidatus_Bathyarchaeota:52|Unclassified_Candidatus_Micrarchaeota:49|Unclassified_Candidatus_Woesearchaeota:43|Methanococci:42|Unclassifie…	Halobacteria:231|Thermoprotei:39|Unclassified_Archaea:5|Archaeoglobi:3|Methanococci:3|Unclassified_Candidatus_Heimdallarchaeota:2|Candidatus_Methanoliparia:1|Candidatus_Poseidoniia:1|Unclassified_Candidatus_Hydrothermarchaeota:1	Halobacteria:291	-	-
M00573|Biotin_biosynthesis_BioI_pathway_long-chain-acyl-ACP_=>_pimeloyl-ACP_=>_biotin	5	5	2203	517	258	0	0	K16593:486.03|K00652:464.80|K19563:784.47|K01935:117.40|K01012:168.67	Halobacteria:337|Methanomicrobia:301|Thermoprotei:300|Unclassified_Archaea:184|Unclassified_Euryarchaeota:151|Unclassified_Nitrososphaerota:129|Methanobacteria:125|Thermococci:85|Thermoplasmata:84|Unclassified_Thermoproteota:71|Unclassified_Candidatus_Micrarchaeota:48|Unclassified_Candidatus_Bathyarchaeota:47|Unclassified_Candidatus_Aenigmatarchaeota:41|Unclassified_Candidatus_Woesearchaeota:39|A…	Unclassified_Nitrososphaerota:134|Methanobacteria:117|Halobacteria:96|Nitrososphaeria:47|Methanococci:41|Unclassified_Thermoproteota:18|Methanomicrobia:11|Thermoprotei:11|Unclassified_Archaea:8|Unclassified_Euryarchaeota:7|Unclassified_Candidatus_Bathyarchaeota:5|Thermoplasmata:4|Unclassified_Candidatus_Woesearchaeota:4|Unclassified_Candidatus_Geothermarchaeota:2|Unclassified_Candidatus_Korarchae…	Halobacteria:225|Methanobacteria:15|Methanomicrobia:11|Methanococci:4|Archaeoglobi:1|Unclassified_Nitrososphaerota:1|Unclassified_Archaea:1	-	-
M00552|D-galactonate_degradation_De_Ley-Doudoroff_pathway_D-galactonate_=>_glycerate-3P	5	5	661	2069	248	0	0	K01684:351.37|K00883:50.20|K01631:196.03|K00134:425.43|K00927:204.47	Unclassified_Archaea:114|Unclassified_Nitrososphaerota:101|Unclassified_Euryarchaeota:87|Thermoprotei:49|Unclassified_Thermoproteota:45|Unclassified_Candidatus_Micrarchaeota:30|Unclassified_Candidatus_Parvarchaeota:23|Halobacteria:22|Unclassified_Candidatus_Aenigmatarchaeota:20|Thermoplasmata:19|Methanomicrobia:18|Unclassified_Nanoarchaeota:15|Nitrososphaeria:14|Unclassified_Candidatus_Woesearcha…	Halobacteria:393|Methanomicrobia:305|Thermoprotei:262|Methanobacteria:247|Unclassified_Nitrososphaerota:163|Thermococci:85|Unclassified_Archaea:79|Unclassified_Euryarchaeota:71|Thermoplasmata:69|Methanococci:44|Nitrososphaeria:43|Unclassified_Thermoproteota:42|Unclassified_Candidatus_Bathyarchaeota:36|Unclassified_Candidatus_Woesearchaeota:30|Archaeoglobi:27|Unclassified_Candidatus_Aenigmatarchae…	Halobacteria:243|Unclassified_Candidatus_Bathyarchaeota:3|Unclassified_Thermoproteota:2	-	-
M00170|C4-dicarboxylic_acid_cycle_phosphoenolpyruvate_carboxykinase_type	4	4	1524	1239	215	0	0	K01595:46.33|K14454:630.70|K14455:690.10|K01610:86.17	Methanobacteria:238|Methanomicrobia:181|Unclassified_Archaea:153|Unclassified_Euryarchaeota:128|Unclassified_Nitrososphaerota:108|Thermoprotei:82|Unclassified_Thermoproteota:67|Thermoplasmata:67|Halobacteria:53|Unclassified_Candidatus_Micrarchaeota:48|Thermococci:48|Methanococci:43|Unclassified_Candidatus_Bathyarchaeota:40|Unclassified_Candidatus_Woesearchaeota:35|Unclassified_Candidatus_Aenigmat…	Halobacteria:402|Thermoprotei:227|Unclassified_Nitrososphaerota:153|Methanomicrobia:142|Nitrososphaeria:43|Unclassified_Archaea:38|Thermococci:38|Unclassified_Euryarchaeota:30|Unclassified_Thermoproteota:22|Thermoplasmata:21|Methanobacteria:19|Candidatus_Poseidoniia:18|Archaeoglobi:17|Unclassified_Candidatus_Bathyarchaeota:10|Unclassified_Candidatus_Aenigmatarchaeota:8|Unclassified_Candidatus_Woe…	Halobacteria:203|Unclassified_Nitrososphaerota:3|Thermoprotei:2|Unclassified_Candidatus_Bathyarchaeota:2|Unclassified_Archaea:2|Unclassified_Candidatus_Woesearchaeota:2|Unclassified_Candidatus_Heimdallarchaeota:1	-	-
M00961|Betacyanin_biosynthesis_L-tyrosine_=>_amaranthin	2	2	2768	0	210	0	0	K26037:848.93|K15777:89.87	Halobacteria:658|Methanomicrobia:295|Unclassified_Nitrososphaerota:264|Methanobacteria:245|Unclassified_Archaea:185|Thermoprotei:168|Unclassified_Euryarchaeota:158|Unclassified_Thermoproteota:88|Thermococci:86|Thermoplasmata:82|Nitrososphaeria:57|Unclassified_Candidatus_Bathyarchaeota:52|Unclassified_Candidatus_Micrarchaeota:49|Methanococci:45|Unclassified_Candidatus_Woesearchaeota:43|Unclassifie…	-	Thermoprotei:143|Methanomicrobia:28|Methanobacteria:12|Unclassified_Archaea:8|Unclassified_Candidatus_Marsarchaeota:7|Thermoplasmata:6|Unclassified_Candidatus_Thorarchaeota:2|Unclassified_Candidatus_Lokiarchaeota:2|Unclassified_Candidatus_Heimdallarchaeota:1|Unclassified_Thermoproteota:1	-	-
M00088|Ketone_body_biosynthesis_acetyl-CoA_=>_acetoacetate/3-hydroxybutyrate/acetone	3	3	746	2034	198	0	0	K00626:489.07|K01641:159.53|K01640:137.20	Unclassified_Archaea:133|Unclassified_Nitrososphaerota:93|Unclassified_Euryarchaeota:83|Thermoprotei:51|Unclassified_Candidatus_Woesearchaeota:43|Halobacteria:42|Unclassified_Thermoproteota:33|Methanobacteria:33|Unclassified_Candidatus_Parvarchaeota:27|Unclassified_Candidatus_Aenigmatarchaeota:27|Methanomicrobia:26|Unclassified_Candidatus_Bathyarchaeota:22|Thermoplasmata:20|Unclassified_Candidatu…	Halobacteria:541|Methanomicrobia:284|Thermoprotei:233|Methanobacteria:224|Unclassified_Nitrososphaerota:166|Thermococci:84|Unclassified_Euryarchaeota:58|Unclassified_Archaea:58|Unclassified_Thermoproteota:54|Thermoplasmata:49|Nitrososphaeria:45|Methanococci:45|Unclassified_Candidatus_Micrarchaeota:30|Unclassified_Candidatus_Bathyarchaeota:28|Unclassified_Candidatus_Aenigmatarchaeota:14|Unclassifi…	Halobacteria:75|Thermoprotei:27|Archaeoglobi:20|Thermoplasmata:19|Unclassified_Euryarchaeota:17|Methanomicrobia:13|Unclassified_Candidatus_Korarchaeota:5|Unclassified_Nitrososphaerota:5|Candidatus_Methanoliparia:3|Unclassified_Candidatus_Geoarchaeota:2|Unclassified_Candidatus_Bathyarchaeota:2|Unclassified_Thermoproteota:2|Unclassified_Archaea:2|Unclassified_Candidatus_Thermoplasmatota:1|Unclassif…	-	-
M00878|Phenylacetate_degradation_phenylaxetate_=>_acetyl-CoA/succinyl-CoA	11	7	1336	1465	177	0	0	K01912:267.03|K02609+K02610+K02611+K02612+K02613:141.93+60.50+149.80+138.70+362.53|K15866:286.77|K02618:686.87|K02615:763.73|K01692:318.30|K00074:413.67	Unclassified_Nitrososphaerota:245|Unclassified_Archaea:160|Thermoprotei:153|Unclassified_Euryarchaeota:108|Thermococci:85|Unclassified_Thermoproteota:61|Nitrososphaeria:57|Halobacteria:57|Unclassified_Candidatus_Micrarchaeota:47|Unclassified_Candidatus_Woesearchaeota:43|Unclassified_Candidatus_Bathyarchaeota:43|Unclassified_Candidatus_Aenigmatarchaeota:41|Methanomicrobia:35|Thermoplasmata:28|Uncl…	Halobacteria:434|Methanomicrobia:288|Methanobacteria:256|Thermoprotei:158|Thermoplasmata:60|Unclassified_Euryarchaeota:50|Archaeoglobi:36|Unclassified_Archaea:30|Unclassified_Thermoproteota:28|Methanococci:28|Unclassified_Nitrososphaerota:18|Candidatus_Poseidoniia:11|Unclassified_Candidatus_Bathyarchaeota:9|Candidatus_Methanofastidiosa:8|Unclassified_Candidatus_Verstraetearchaeota:6|Candidatus_Me…	Halobacteria:167|Unclassified_Candidatus_Marsarchaeota:6|Unclassified_Archaea:3|Unclassified_Nitrososphaerota:1	-	-
M00611|Oxygenic_photosynthesis_in_plants_and_cyanobacteria	30	12	209	2595	174	0	0	K02703+K02706+K02705+K02704+K02707+K02708,K02689+K02690+K02691+K02692+K02693+K02694:292.63+380.53+407.73+321.97+98.83+78.60,889.03+902.40+151.73+136.70+65.37+134.77|K00855:159.50|K01601:330.63|K00927:204.47|K05298,K00150,K00134:662.57,334.77,425.43|K01803:29.33|K01623,K01624:34.20,96.33|K03841,K02446,K11532,K01086:213.93,473.30,482.13,582.87|K00615:206.03|K01100,K11532,K01086:343.13,482.13,582.87…	Unclassified_Archaea:43|Unclassified_Euryarchaeota:35|Unclassified_Nitrososphaerota:27|Unclassified_Candidatus_Micrarchaeota:22|Unclassified_Thermoproteota:16|Unclassified_Candidatus_Aenigmatarchaeota:14|Thermoplasmata:6|Unclassified_Nanoarchaeota:6|Unclassified_Candidatus_Parvarchaeota:5|Methanomicrobia:4|Unclassified_Candidatus_Woesearchaeota:4|Candidatus_Micrarchaeia:4|Thermoprotei:4|Nitrososp…	Halobacteria:590|Thermoprotei:307|Methanomicrobia:269|Methanobacteria:257|Unclassified_Nitrososphaerota:237|Unclassified_Archaea:148|Unclassified_Euryarchaeota:114|Thermococci:86|Unclassified_Thermoproteota:73|Thermoplasmata:64|Nitrososphaeria:54|Unclassified_Candidatus_Bathyarchaeota:50|Unclassified_Candidatus_Woesearchaeota:38|Archaeoglobi:36|Methanococci:34|Unclassified_Candidatus_Aenigmatarch…	Halobacteria:68|Methanomicrobia:50|Thermoplasmata:18|Methanococci:11|Unclassified_Euryarchaeota:9|Unclassified_Candidatus_Thermoplasmatota:3|Unclassified_Candidatus_Altiarchaeota:3|Unclassified_Candidatus_Micrarchaeota:3|Unclassified_Candidatus_Lokiarchaeota:2|Hadesarchaea:2|Unclassified_Archaea:2|Unclassified_Candidatus_Woesearchaeota:1|Unclassified_Candidatus_Bathyarchaeota:1|Unclassified_Candi…	-	-
M00535|Isoleucine_biosynthesis_pyruvate_=>_2-oxobutanoate	4	3	1758	1062	158	0	0	K09011:622.07|K01703+K01704:461.53+130.77|K00052:435.77	Thermoprotei:294|Unclassified_Nitrososphaerota:263|Unclassified_Archaea:181|Halobacteria:153|Unclassified_Euryarchaeota:133|Unclassified_Thermoproteota:88|Thermoplasmata:88|Thermococci:79|Nitrososphaeria:57|Methanomicrobia:49|Unclassified_Candidatus_Micrarchaeota:48|Unclassified_Candidatus_Woesearchaeota:41|Unclassified_Candidatus_Aenigmatarchaeota:40|Unclassified_Candidatus_Bathyarchaeota:28|Unc…	Halobacteria:505|Methanomicrobia:234|Methanobacteria:185|Archaeoglobi:20|Unclassified_Candidatus_Bathyarchaeota:19|Thermoprotei:17|Methanococci:15|Unclassified_Euryarchaeota:14|Unclassified_Archaea:12|Thermococci:7|Unclassified_Candidatus_Altiarchaeota:5|Candidatus_Methanofastidiosa:4|Hadesarchaea:4|Unclassified_Candidatus_Lokiarchaeota:3|Unclassified_Candidatus_Woesearchaeota:2|Methanonatronarch…	Methanobacteria:50|Methanomicrobia:40|Methanococci:30|Unclassified_Euryarchaeota:11|Archaeoglobi:11|Unclassified_Candidatus_Bathyarchaeota:5|Candidatus_Methanoliparia:3|Methanopyri:3|Unclassified_Candidatus_Altiarchaeota:2|Hadesarchaea:2|Methanonatronarchaeia:1	-	-
M00972|Proline_metabolism	3	3	1743	1078	157	0	0	K00819:497.30|K00286:133.23|K00318:185.00	Unclassified_Nitrososphaerota:242|Methanobacteria:219|Unclassified_Archaea:175|Thermoprotei:134|Unclassified_Euryarchaeota:123|Halobacteria:117|Methanomicrobia:98|Unclassified_Thermoproteota:75|Nitrososphaeria:57|Thermoplasmata:50|Thermococci:47|Unclassified_Candidatus_Micrarchaeota:45|Methanococci:45|Unclassified_Candidatus_Aenigmatarchaeota:41|Unclassified_Candidatus_Woesearchaeota:39|Unclassif…	Halobacteria:396|Methanomicrobia:225|Thermoprotei:177|Thermococci:39|Thermoplasmata:38|Methanobacteria:38|Unclassified_Euryarchaeota:28|Unclassified_Candidatus_Bathyarchaeota:24|Unclassified_Nitrososphaerota:22|Unclassified_Archaea:18|Unclassified_Thermoproteota:14|Archaeoglobi:12|Candidatus_Poseidoniia:6|Unclassified_Candidatus_Lokiarchaeota:4|Unclassified_Candidatus_Woesearchaeota:4|Candidatus_…	Halobacteria:145|Unclassified_Euryarchaeota:7|Unclassified_Candidatus_Heimdallarchaeota:2|Unclassified_Candidatus_Lokiarchaeota:2|Unclassified_Candidatus_Diapherotrites:1	-	-
M00912|NAD_biosynthesis_tryptophan_=>_quinolinate_=>_NAD	13	8	620	2204	154	0	0	K00453,K00463:71.30,121.33|K01432,K14263,K07130:151.47,157.43,116.73|K00486:337.43|K01556:176.33|K00452:67.17|K00767:213.90|K00969,K06210:116.73,102.30|K01916,K01950:285.70,495.73	Unclassified_Archaea:116|Unclassified_Nitrososphaerota:90|Unclassified_Euryarchaeota:75|Unclassified_Thermoproteota:42|Unclassified_Candidatus_Woesearchaeota:41|Thermoprotei:36|Unclassified_Candidatus_Aenigmatarchaeota:32|Unclassified_Candidatus_Micrarchaeota:30|Unclassified_Candidatus_Parvarchaeota:24|Unclassified_Nanoarchaeota:16|Halobacteria:14|Nitrososphaeria:13|Methanomicrobia:12|Thermoplasm…	Halobacteria:496|Methanomicrobia:311|Thermoprotei:275|Methanobacteria:253|Unclassified_Nitrososphaerota:174|Unclassified_Euryarchaeota:83|Thermococci:83|Unclassified_Archaea:77|Thermoplasmata:76|Unclassified_Thermoproteota:47|Unclassified_Candidatus_Bathyarchaeota:45|Methanococci:45|Nitrososphaeria:44|Archaeoglobi:32|Unclassified_Candidatus_Micrarchaeota:19|Candidatus_Poseidoniia:16|Unclassified_…	Halobacteria:148|Unclassified_Candidatus_Heimdallarchaeota:3|Thermococci:2|Thermoplasmata:1	-	-
M00565|Trehalose_biosynthesis_D-glucose_1P_=>_trehalose	7	6	2477	352	149	0	0	K00975:194.97|K00703:129.90|K00700,K16149:282.43,331.50|K01214:916.13|K06044:596.13|K01236:414.30	Halobacteria:658|Methanomicrobia:291|Unclassified_Nitrososphaerota:258|Methanobacteria:235|Unclassified_Archaea:181|Unclassified_Euryarchaeota:152|Thermoprotei:84|Thermoplasmata:74|Unclassified_Thermoproteota:68|Nitrososphaeria:57|Unclassified_Candidatus_Bathyarchaeota:51|Unclassified_Candidatus_Micrarchaeota:49|Unclassified_Candidatus_Woesearchaeota:42|Archaeoglobi:38|Unclassified_Candidatus_Aen…	Thermoprotei:99|Thermococci:82|Methanococci:38|Methanomicrobia:32|Methanobacteria:22|Unclassified_Thermoproteota:20|Unclassified_Archaea:9|Unclassified_Candidatus_Altiarchaeota:7|Unclassified_Candidatus_Lokiarchaeota:7|Unclassified_Euryarchaeota:6|Unclassified_Nitrososphaerota:5|Thermoplasmata:5|Unclassified_Candidatus_Heimdallarchaeota:3|Unclassified_Candidatus_Geoarchaeota:3|Candidatus_Methanom…	Thermoprotei:128|Thermoplasmata:9|Unclassified_Candidatus_Marsarchaeota:4|Candidatus_Methanomethylicia:3|Unclassified_Archaea:3|Unclassified_Nitrososphaerota:1|Unclassified_Thermoproteota:1	-	-
M00374|Dicarboxylate-hydroxybutyrate_cycle	22	13	469	2362	147	0	0	K00169+K00170+K00171+K00172:290.13+313.30+100.10+151.70|K01007:390.73|K01595:46.33|K00024:371.37|K01677+K01678:305.93+225.10|K00239+K00240:651.07+140.63|K01902+K01903:361.23+499.70|K15038,K15017:694.93,695.97|K14465:455.77|K14467,K18861,K25774:1011.63,929.13,1025.33|K14534:417.20|K15016:459.87|K00626:489.07	Unclassified_Euryarchaeota:73|Unclassified_Archaea:70|Unclassified_Nitrososphaerota:57|Unclassified_Thermoproteota:41|Methanobacteria:23|Unclassified_Candidatus_Aenigmatarchaeota:22|Methanomicrobia:19|Unclassified_Candidatus_Micrarchaeota:19|Unclassified_Candidatus_Bathyarchaeota:19|Thermoplasmata:15|Unclassified_Candidatus_Parvarchaeota:13|Unclassified_Candidatus_Woesearchaeota:12|Nitrososphaeri…	Halobacteria:652|Methanomicrobia:304|Methanobacteria:234|Unclassified_Nitrososphaerota:207|Thermoprotei:154|Unclassified_Archaea:122|Unclassified_Euryarchaeota:85|Thermococci:83|Thermoplasmata:73|Unclassified_Thermoproteota:48|Nitrososphaeria:46|Methanococci:45|Archaeoglobi:36|Unclassified_Candidatus_Bathyarchaeota:33|Unclassified_Candidatus_Woesearchaeota:31|Unclassified_Candidatus_Micrarchaeota…	Thermoprotei:146|Unclassified_Archaea:1	-	-
M00344|Formaldehyde_assimilation_xylulose_monophosphate_pathway	4	4	2109	726	143	0	0	K17100:904.07|K00863:528.50|K01624:96.33|K03841:213.93	Thermoprotei:310|Unclassified_Nitrososphaerota:263|Methanobacteria:238|Methanomicrobia:212|Unclassified_Archaea:168|Unclassified_Euryarchaeota:143|Thermoplasmata:87|Thermococci:86|Unclassified_Thermoproteota:84|Nitrososphaeria:57|Methanococci:45|Unclassified_Candidatus_Aenigmatarchaeota:41|Halobacteria:39|Archaeoglobi:37|Unclassified_Candidatus_Bathyarchaeota:37|Unclassified_Candidatus_Micrarchae…	Halobacteria:500|Methanomicrobia:97|Unclassified_Archaea:24|Methanobacteria:19|Unclassified_Candidatus_Bathyarchaeota:14|Unclassified_Candidatus_Woesearchaeota:13|Unclassified_Candidatus_Micrarchaeota:13|Unclassified_Euryarchaeota:11|Unclassified_Candidatus_Marsarchaeota:7|Unclassified_Thermoproteota:5|Unclassified_Candidatus_Lokiarchaeota:5|Unclassified_Candidatus_Diapherotrites:4|Nanohaloarchae…	Halobacteria:119|Methanomicrobia:14|Unclassified_Candidatus_Altiarchaeota:4|Unclassified_Euryarchaeota:4|Unclassified_Candidatus_Bathyarchaeota:1|Unclassified_Archaea:1	-	-
M00100|Sphingosine_degradation	2	2	2848	0	130	0	0	K04718:288.87|K01634:364.73	Halobacteria:652|Methanomicrobia:323|Methanobacteria:257|Unclassified_Nitrososphaerota:255|Thermoprotei:242|Unclassified_Archaea:185|Unclassified_Euryarchaeota:157|Thermococci:86|Unclassified_Thermoproteota:84|Thermoplasmata:82|Nitrososphaeria:57|Unclassified_Candidatus_Bathyarchaeota:51|Unclassified_Candidatus_Micrarchaeota:49|Methanococci:45|Unclassified_Candidatus_Woesearchaeota:43|Unclassifie…	-	Thermoprotei:69|Archaeoglobi:19|Unclassified_Nitrososphaerota:9|Unclassified_Archaea:8|Halobacteria:6|Thermoplasmata:6|Unclassified_Thermoproteota:5|Unclassified_Candidatus_Lokiarchaeota:2|Unclassified_Candidatus_Nezhaarchaeota:2|Candidatus_Hadarchaeia:1|Unclassified_Euryarchaeota:1|Unclassified_Candidatus_Geothermarchaeota:1|Unclassified_Candidatus_Bathyarchaeota:1	-	-
M00947|D-Arginine_racemization_D-arginine_=>_L-arginine	2	2	2866	0	112	0	0	K19746:199.23|K19744:370.87	Halobacteria:548|Methanomicrobia:323|Thermoprotei:311|Unclassified_Nitrososphaerota:264|Methanobacteria:257|Unclassified_Archaea:193|Unclassified_Euryarchaeota:156|Unclassified_Thermoproteota:89|Thermoplasmata:88|Thermococci:86|Nitrososphaeria:57|Unclassified_Candidatus_Bathyarchaeota:52|Unclassified_Candidatus_Micrarchaeota:49|Methanococci:45|Unclassified_Candidatus_Woesearchaeota:43|Unclassifie…	-	Halobacteria:110|Unclassified_Euryarchaeota:2	-	-
M00618|Acetogen	16	9	1394	1475	109	0	0	K00198:371.20|K05299,K22015+K25123+K25124:1198.60,869.43+641.53+200.20|K01938:879.67|K01491:410.60|K00297:196.27|K15023:269.63|K14138+K00197+K00194:966.03+334.03+275.80|K00625,K13788,K15024:378.60,568.80,265.27|K00925:134.27	Thermoprotei:300|Methanobacteria:203|Unclassified_Nitrososphaerota:155|Unclassified_Archaea:140|Unclassified_Euryarchaeota:73|Unclassified_Thermoproteota:62|Thermococci:61|Thermoplasmata:51|Unclassified_Candidatus_Micrarchaeota:47|Halobacteria:45|Unclassified_Candidatus_Aenigmatarchaeota:40|Nitrososphaeria:26|Unclassified_Candidatus_Woesearchaeota:25|Unclassified_Candidatus_Parvarchaeota:23|Uncla…	Halobacteria:613|Methanomicrobia:210|Unclassified_Nitrososphaerota:109|Unclassified_Euryarchaeota:83|Methanobacteria:54|Unclassified_Archaea:53|Methanococci:45|Unclassified_Candidatus_Bathyarchaeota:32|Thermoplasmata:31|Nitrososphaeria:31|Archaeoglobi:30|Unclassified_Thermoproteota:27|Thermococci:25|Unclassified_Candidatus_Woesearchaeota:18|Unclassified_Candidatus_Altiarchaeota:15|Candidatus_Pose…	Methanomicrobia:101|Thermoplasmata:6|Unclassified_Euryarchaeota:2	-	-
M00024|Phenylalanine_biosynthesis_chorismate_=>_phenylpyruvate_=>_phenylalanine	13	3	1667	1203	108	0	0	K01850,K04092,K14187,K04093,K04516,K06208,K06209,K14170:134.23,89.87,350.20,61.80,213.13,85.10,125.30,360.77|K01713,K04518,K05359,K14170:234.23,328.13,347.50,360.77|K00832,K00838:553.30,436.93	Thermoprotei:306|Unclassified_Archaea:166|Unclassified_Nitrososphaerota:146|Unclassified_Euryarchaeota:127|Methanobacteria:120|Methanomicrobia:118|Thermococci:82|Thermoplasmata:79|Unclassified_Thermoproteota:73|Unclassified_Candidatus_Woesearchaeota:43|Unclassified_Candidatus_Micrarchaeota:43|Halobacteria:43|Unclassified_Candidatus_Aenigmatarchaeota:41|Methanococci:35|Unclassified_Candidatus_Bath…	Halobacteria:615|Methanomicrobia:199|Methanobacteria:137|Unclassified_Nitrososphaerota:106|Nitrososphaeria:37|Unclassified_Euryarchaeota:25|Unclassified_Candidatus_Bathyarchaeota:15|Methanococci:10|Unclassified_Archaea:10|Thermoplasmata:8|Unclassified_Thermoproteota:8|Hadesarchaea:5|Thermococci:4|Candidatus_Methanofastidiosa:3|Unclassified_Candidatus_Geoarchaeota:3|Unclassified_Candidatus_Micrarc…	Archaeoglobi:27|Unclassified_Archaea:17|Unclassified_Nitrososphaerota:12|Unclassified_Thermoproteota:8|Unclassified_Candidatus_Bathyarchaeota:7|Methanomicrobia:6|Unclassified_Euryarchaeota:6|Candidatus_Methanomethylicia:4|Thermoprotei:4|Unclassified_Candidatus_Lokiarchaeota:3|Unclassified_Candidatus_Micrarchaeota:3|Unclassified_Candidatus_Altiarchaeota:2|Unclassified_Candidatus_Verstraetearchaeot…	-	-
M00174|Methane_oxidation_methanotroph_methane_=>_formaldehyde	11	2	2771	107	100	0	0	K10944+K10945+K10946,K16157+K16158+K16159+K16160+K16161+K16162:152.33+159.87+134.27,1158.10+694.17+253.13+244.63+491.20+85.03|K14028,K23995:1078.30,839.43	Halobacteria:658|Methanomicrobia:323|Thermoprotei:311|Methanobacteria:257|Unclassified_Archaea:186|Unclassified_Euryarchaeota:155|Unclassified_Nitrososphaerota:124|Thermoplasmata:88|Thermococci:86|Unclassified_Thermoproteota:74|Unclassified_Candidatus_Bathyarchaeota:52|Unclassified_Candidatus_Micrarchaeota:49|Methanococci:45|Unclassified_Candidatus_Woesearchaeota:43|Unclassified_Candidatus_Aenigm…	Unclassified_Nitrososphaerota:72|Nitrososphaeria:15|Unclassified_Thermoproteota:13|Unclassified_Archaea:4|Unclassified_Euryarchaeota:3	Unclassified_Nitrososphaerota:68|Nitrososphaeria:27|Unclassified_Archaea:3|Unclassified_Thermoproteota:2	-	-
M00066|Lactosylceramide_biosynthesis	3	2	2909	0	69	0	0	K00720:116.60|K07553,K09905:683.87,728.97	Halobacteria:658|Methanomicrobia:323|Thermoprotei:288|Unclassified_Nitrososphaerota:264|Methanobacteria:257|Unclassified_Archaea:192|Unclassified_Euryarchaeota:152|Unclassified_Thermoproteota:88|Thermococci:86|Thermoplasmata:68|Nitrososphaeria:57|Unclassified_Candidatus_Bathyarchaeota:52|Methanococci:45|Unclassified_Candidatus_Woesearchaeota:43|Unclassified_Candidatus_Aenigmatarchaeota:41|Archaeo…	-	Thermoprotei:23|Thermoplasmata:20|Unclassified_Candidatus_Micrarchaeota:14|Unclassified_Euryarchaeota:6|Candidatus_Micrarchaeia:3|Unclassified_Archaea:1|Unclassified_Thermoproteota:1|Unclassified_Candidatus_Geoarchaeota:1	-	-
M00008|Entner-Doudoroff_pathway_glucose-6P_=>_glyceraldehyde-3P_+_pyruvate	5	4	2503	410	65	0	0	K00036:370.97|K01057,K07404:114.33,129.30|K01690:547.53|K01625:191.60	Methanomicrobia:323|Thermoprotei:311|Unclassified_Nitrososphaerota:258|Methanobacteria:257|Halobacteria:244|Unclassified_Archaea:175|Unclassified_Euryarchaeota:155|Thermoplasmata:88|Unclassified_Thermoproteota:87|Thermococci:86|Nitrososphaeria:52|Unclassified_Candidatus_Micrarchaeota:49|Methanococci:45|Unclassified_Candidatus_Bathyarchaeota:44|Unclassified_Candidatus_Aenigmatarchaeota:41|Unclassi…	Halobacteria:357|Unclassified_Archaea:14|Unclassified_Candidatus_Bathyarchaeota:7|Nitrososphaeria:5|Unclassified_Nitrososphaerota:5|Unclassified_Candidatus_Woesearchaeota:5|Unclassified_Candidatus_Thorarchaeota:4|Unclassified_Candidatus_Lokiarchaeota:3|Unclassified_Euryarchaeota:3|Unclassified_Thermoproteota:2|Hadesarchaea:1|Unclassified_Candidatus_Heimdallarchaeota:1|Nanohaloarchaea:1|Unclassifi…	Halobacteria:57|Unclassified_Archaea:4|Unclassified_Nitrososphaerota:1|Unclassified_Candidatus_Heimdallarchaeota:1|Unclassified_Candidatus_Diapherotrites:1|Unclassified_Candidatus_Bathyarchaeota:1	-	-
M00546|Purine_degradation_xanthine_=>_urea	20	6	2650	263	65	0	0	K00106,K00087+K13479+K13480,K13481+K13482,K11177+K11178+K13483:1591.80,846.30+311.47+244.00,456.70+1086.53,651.33+249.90+250.67|K00365,K16838,K16839,K22879:201.30,333.93,310.80,190.97|K13484,K07127:165.73,125.23|K13484,K13485,K16838,K16840:165.73,205.87,333.93,165.00|K01466,K16842:362.67,313.27|K01477:151.27	Halobacteria:490|Methanomicrobia:306|Thermoprotei:289|Methanobacteria:256|Unclassified_Nitrososphaerota:235|Unclassified_Archaea:178|Unclassified_Euryarchaeota:152|Thermoplasmata:86|Thermococci:86|Unclassified_Thermoproteota:81|Nitrososphaeria:57|Unclassified_Candidatus_Micrarchaeota:49|Methanococci:45|Unclassified_Candidatus_Woesearchaeota:43|Unclassified_Candidatus_Aenigmatarchaeota:41|Archaeog…	Halobacteria:105|Unclassified_Nitrososphaerota:28|Unclassified_Candidatus_Bathyarchaeota:27|Thermoprotei:22|Methanomicrobia:17|Unclassified_Archaea:15|Unclassified_Candidatus_Marsarchaeota:10|Unclassified_Thermoproteota:8|Unclassified_Candidatus_Thorarchaeota:5|Unclassified_Euryarchaeota:5|Unclassified_Candidatus_Altiarchaeota:4|Hadesarchaea:4|Thermoplasmata:2|Candidatus_Poseidoniia:2|Unclassifie…	Halobacteria:63|Unclassified_Nitrososphaerota:1|Unclassified_Euryarchaeota:1	-	-
M00528|Nitrification_ammonia_=>_nitrite	4	2	2929	0	49	0	0	K10944+K10945+K10946:152.33+159.87+134.27|K10535:291.80	Halobacteria:658|Thermoprotei:303|Methanomicrobia:299|Unclassified_Nitrososphaerota:264|Methanobacteria:257|Unclassified_Archaea:193|Unclassified_Euryarchaeota:155|Unclassified_Thermoproteota:89|Thermoplasmata:88|Thermococci:86|Nitrososphaeria:57|Unclassified_Candidatus_Bathyarchaeota:51|Unclassified_Candidatus_Micrarchaeota:49|Methanococci:45|Unclassified_Candidatus_Woesearchaeota:43|Unclassifie…	-	Methanomicrobia:24|Archaeoglobi:11|Thermoprotei:8|Unclassified_Euryarchaeota:3|Candidatus_Hydrothermarchaeia:1|Unclassified_Candidatus_Bathyarchaeota:1|Unclassified_Candidatus_Hydrothermarchaeota:1	-	-
M00126|Tetrahydrofolate_biosynthesis_GTP_=>_THF	17	7	1101	1842	35	0	0	K01495,K09007,K22391:53.90,188.97,163.87|K01077,K01113,K08310,K19965:74.10,98.60,84.87,169.97|K13939,K13940,K01633:653.00,265.93,91.53|K13939,K13940,K00950,K01633,K13941:653.00,265.93,41.20,91.53,579.70|K13939,K00796,K13941:653.00,247.07,579.70|K11754,K20457:378.93,446.40|K00287,K13998:56.13,629.83	Methanobacteria:255|Unclassified_Archaea:125|Unclassified_Nitrososphaerota:99|Methanomicrobia:74|Thermoprotei:67|Unclassified_Euryarchaeota:61|Unclassified_Thermoproteota:57|Unclassified_Candidatus_Bathyarchaeota:41|Methanococci:37|Unclassified_Candidatus_Micrarchaeota:35|Archaeoglobi:35|Unclassified_Candidatus_Aenigmatarchaeota:32|Unclassified_Candidatus_Woesearchaeota:28|Thermococci:14|Unclassi…	Halobacteria:629|Methanomicrobia:249|Thermoprotei:243|Unclassified_Nitrososphaerota:165|Unclassified_Euryarchaeota:91|Thermoplasmata:74|Thermococci:72|Unclassified_Archaea:67|Nitrososphaeria:46|Unclassified_Thermoproteota:32|Candidatus_Poseidoniia:22|Unclassified_Candidatus_Parvarchaeota:15|Unclassified_Candidatus_Woesearchaeota:14|Unclassified_Candidatus_Altiarchaeota:12|Unclassified_Candidatus_…	Halobacteria:23|Unclassified_Euryarchaeota:6|Unclassified_Candidatus_Micrarchaeota:2|Unclassified_Candidatus_Heimdallarchaeota:1|Thermoprotei:1|Unclassified_Candidatus_Woesearchaeota:1|Unclassified_Archaea:1	-	-
M00614|Anoxygenic_photosynthesis_in_green_sulfur_bacteria	39	13	236	2709	33	0	0	K08940+K08941+K08942+K08943:1014.30+194.87+246.00+185.30|K00169+K00170+K00171+K00172,K03737:290.13+313.30+100.10+151.70,427.13|K01007,K01006,K01959+K01960,K01958:390.73,374.83,742.23+765.03,829.43|K01595,K01959+K01960,K01958:46.33,742.23+765.03,829.43|K00024:371.37|K01676,K01679,K01677+K01678:353.47,654.27,305.93+225.10|K00239+K00240,K18556+K18557+K18558+K18559+K18560:651.07+140.63,780.67+364.73+…	Unclassified_Nitrososphaerota:53|Unclassified_Euryarchaeota:43|Unclassified_Archaea:40|Unclassified_Thermoproteota:20|Unclassified_Candidatus_Aenigmatarchaeota:13|Unclassified_Candidatus_Parvarchaeota:10|Unclassified_Nanoarchaeota:9|Unclassified_Candidatus_Woesearchaeota:6|Unclassified_Candidatus_Micrarchaeota:5|Nitrososphaeria:5|Thermoplasmata:5|Thermoprotei:4|Unclassified_Candidatus_Bathyarchae…	Halobacteria:655|Methanomicrobia:300|Thermoprotei:297|Methanobacteria:257|Unclassified_Nitrososphaerota:211|Unclassified_Archaea:153|Unclassified_Euryarchaeota:115|Thermococci:86|Thermoplasmata:83|Unclassified_Thermoproteota:69|Nitrososphaeria:52|Unclassified_Candidatus_Bathyarchaeota:49|Methanococci:45|Unclassified_Candidatus_Micrarchaeota:44|Archaeoglobi:38|Unclassified_Candidatus_Woesearchaeot…	Methanomicrobia:21|Thermoprotei:10|Unclassified_Candidatus_Heimdallarchaeota:1|Halobacteria:1	-	-
M00082|Fatty_acid_biosynthesis_initiation	14	3	1788	1158	32	0	0	K11262,K02160+K01961,K11263,K01962+K01963,K18472:1270.53,88.00+743.67,797.07,364.90+371.53,607.23|K00665,K00667+K00668,K11533,K00645:878.23,1423.90+1595.60,2539.83,268.43|K00665,K00667+K00668,K11533,K00648,K18473:878.23,1423.90+1595.60,2539.83,227.07,603.87	Thermoprotei:307|Unclassified_Nitrososphaerota:262|Unclassified_Archaea:180|Unclassified_Euryarchaeota:141|Methanomicrobia:91|Halobacteria:88|Thermococci:86|Unclassified_Thermoproteota:85|Thermoplasmata:78|Nitrososphaeria:57|Unclassified_Candidatus_Micrarchaeota:49|Unclassified_Candidatus_Bathyarchaeota:46|Unclassified_Candidatus_Aenigmatarchaeota:41|Unclassified_Candidatus_Woesearchaeota:36|Arch…	Halobacteria:547|Methanobacteria:231|Methanomicrobia:226|Methanococci:45|Unclassified_Euryarchaeota:17|Unclassified_Archaea:13|Candidatus_Poseidoniia:13|Thermoplasmata:10|Archaeoglobi:9|Candidatus_Methanofastidiosa:8|Unclassified_Candidatus_Woesearchaeota:7|Unclassified_Candidatus_Verstraetearchaeota:6|Unclassified_Candidatus_Bathyarchaeota:5|Thermoprotei:4|Unclassified_Thermoproteota:4|Candidatu…	Halobacteria:23|Methanomicrobia:6|Archaeoglobi:1|Unclassified_Nitrososphaerota:1|Unclassified_Candidatus_Bathyarchaeota:1	-	-
M00555|Betaine_biosynthesis_choline_=>_betaine	6	2	2949	0	29	0	0	K17755,K00108,K11440,K00499:814.43,737.90,508.97,292.53|K17755,K00130,K14085:814.43,694.40,788.57	Halobacteria:637|Methanomicrobia:323|Thermoprotei:311|Unclassified_Nitrososphaerota:264|Methanobacteria:257|Unclassified_Archaea:192|Unclassified_Euryarchaeota:158|Thermoplasmata:88|Thermococci:86|Unclassified_Thermoproteota:82|Nitrososphaeria:57|Unclassified_Candidatus_Bathyarchaeota:52|Unclassified_Candidatus_Micrarchaeota:49|Methanococci:45|Unclassified_Candidatus_Woesearchaeota:43|Unclassifie…	-	Halobacteria:21|Unclassified_Thermoproteota:7|Unclassified_Archaea:1	-	-
M00714|Multidrug_resistance_efflux_pump_QacA	2	2	2952	0	26	0	0	K18938:212.80|K08167:412.70	Halobacteria:658|Methanomicrobia:321|Thermoprotei:311|Unclassified_Nitrososphaerota:262|Methanobacteria:256|Unclassified_Archaea:193|Unclassified_Euryarchaeota:149|Unclassified_Thermoproteota:89|Thermoplasmata:86|Thermococci:86|Nitrososphaeria:57|Unclassified_Candidatus_Bathyarchaeota:52|Unclassified_Candidatus_Micrarchaeota:49|Methanococci:45|Unclassified_Candidatus_Woesearchaeota:43|Unclassifie…	-	Candidatus_Poseidoniia:10|Unclassified_Euryarchaeota:9|Unclassified_Nitrososphaerota:2|Thermoplasmata:2|Methanomicrobia:2|Methanobacteria:1	-	-
M00027|GABA_(gamma-Aminobutyrate)_shunt	8	3	2524	437	17	0	0	K01580:335.17|K13524,K07250,K00823,K16871:385.70,647.40,606.17,593.13|K00135,K00139,K17761:587.53,830.23,821.13	Halobacteria:392|Thermoprotei:302|Unclassified_Nitrososphaerota:258|Methanomicrobia:245|Methanobacteria:221|Unclassified_Archaea:187|Unclassified_Euryarchaeota:149|Unclassified_Thermoproteota:85|Thermococci:85|Thermoplasmata:79|Nitrososphaeria:56|Unclassified_Candidatus_Micrarchaeota:48|Methanococci:45|Unclassified_Candidatus_Woesearchaeota:43|Unclassified_Candidatus_Aenigmatarchaeota:41|Archaeog…	Halobacteria:261|Methanomicrobia:66|Methanobacteria:36|Unclassified_Candidatus_Bathyarchaeota:15|Thermoprotei:9|Thermoplasmata:9|Unclassified_Euryarchaeota:9|Unclassified_Nitrososphaerota:6|Unclassified_Archaea:6|Unclassified_Thermoproteota:4|Unclassified_Candidatus_Geothermarchaeota:2|Unclassified_Candidatus_Korarchaeota:2|Theionarchaea:2|Candidatus_Poseidoniia:2|Unclassified_Candidatus_Geoarcha…	Methanomicrobia:12|Halobacteria:5	-	-
M00044|Tyrosine_degradation_tyrosine_=>_homogentisate	9	5	2894	68	16	0	0	K00815,K00838,K00832,K03334:364.83,436.93,553.30,518.00|K00457:308.13|K00451:47.20|K01800:133.57|K01555,K16171:219.57,168.17	Halobacteria:658|Methanomicrobia:323|Thermoprotei:272|Unclassified_Nitrososphaerota:263|Methanobacteria:257|Unclassified_Archaea:188|Unclassified_Euryarchaeota:152|Thermococci:86|Unclassified_Thermoproteota:84|Thermoplasmata:62|Nitrososphaeria:57|Unclassified_Candidatus_Bathyarchaeota:52|Unclassified_Candidatus_Micrarchaeota:49|Methanococci:45|Unclassified_Candidatus_Woesearchaeota:43|Unclassifie…	Thermoprotei:39|Thermoplasmata:20|Unclassified_Euryarchaeota:5|Unclassified_Thermoproteota:2|Unclassified_Nitrososphaerota:1|Unclassified_Archaea:1	Thermoplasmata:6|Unclassified_Archaea:4|Unclassified_Thermoproteota:3|Unclassified_Candidatus_Heimdallarchaeota:2|Unclassified_Euryarchaeota:1	-	-
M00025|Tyrosine_biosynthesis_chorismate_=>_HPP_=>_tyrosine	12	3	1982	986	10	0	0	K01850,K04092,K14170,K04093,K04516,K06208,K06209,K14187:134.23,89.87,360.77,61.80,213.13,85.10,125.30,350.20|K04517,K00211,K14187:193.50,421.97,350.20|K00832,K00838:553.30,436.93	Thermoprotei:307|Unclassified_Nitrososphaerota:252|Methanobacteria:226|Unclassified_Archaea:172|Methanomicrobia:155|Unclassified_Euryarchaeota:143|Thermococci:84|Thermoplasmata:80|Unclassified_Thermoproteota:79|Nitrososphaeria:56|Unclassified_Candidatus_Micrarchaeota:46|Unclassified_Candidatus_Bathyarchaeota:45|Halobacteria:43|Unclassified_Candidatus_Woesearchaeota:42|Unclassified_Candidatus_Aeni…	Halobacteria:615|Methanomicrobia:168|Methanococci:34|Methanobacteria:31|Archaeoglobi:27|Unclassified_Archaea:20|Unclassified_Euryarchaeota:15|Unclassified_Nitrososphaerota:12|Unclassified_Thermoproteota:10|Thermoplasmata:8|Unclassified_Candidatus_Bathyarchaeota:7|Unclassified_Candidatus_Altiarchaeota:5|Candidatus_Methanomethylicia:4|Thermoprotei:4|Candidatus_Methanofastidiosa:3|Unclassified_Candi…	Methanococci:9|Unclassified_Archaea:1	-	-
M00533|Homoprotocatechuate_degradation_homoprotocatechuate_=>_2-oxohept-3-enedioate	4	4	2555	415	8	0	0	K00455:228.53|K00151:718.47|K01826:43.63|K05921:246.33	Halobacteria:426|Thermoprotei:311|Unclassified_Nitrososphaerota:261|Methanobacteria:232|Unclassified_Archaea:192|Methanomicrobia:190|Unclassified_Euryarchaeota:152|Thermoplasmata:87|Thermococci:86|Unclassified_Thermoproteota:82|Nitrososphaeria:57|Unclassified_Candidatus_Bathyarchaeota:52|Unclassified_Candidatus_Micrarchaeota:49|Methanococci:45|Unclassified_Candidatus_Woesearchaeota:43|Unclassifie…	Halobacteria:232|Methanomicrobia:133|Methanobacteria:25|Archaeoglobi:8|Unclassified_Euryarchaeota:5|Unclassified_Thermoproteota:4|Unclassified_Nitrososphaerota:3|Candidatus_Hydrothermarchaeia:1|Unclassified_Candidatus_Thermoplasmatota:1|Unclassified_Candidatus_Hydrothermarchaeota:1|Unclassified_Candidatus_Heimdallarchaeota:1|Thermoplasmata:1	Unclassified_Thermoproteota:3|Unclassified_Candidatus_Geoarchaeota:3|Unclassified_Archaea:1|Unclassified_Euryarchaeota:1	-	-
M00705|Multidrug_resistance_efflux_pump_MepA	2	2	2970	0	8	0	0	K18909:116.57|K18908:481.00	Halobacteria:658|Methanomicrobia:321|Thermoprotei:311|Unclassified_Nitrososphaerota:264|Methanobacteria:257|Unclassified_Archaea:193|Unclassified_Euryarchaeota:158|Unclassified_Thermoproteota:89|Thermoplasmata:88|Thermococci:86|Nitrososphaeria:57|Unclassified_Candidatus_Bathyarchaeota:52|Unclassified_Candidatus_Micrarchaeota:49|Unclassified_Candidatus_Woesearchaeota:43|Unclassified_Candidatus_Aen…	-	Methanococci:6|Methanomicrobia:2	-	-
M00911|Riboflavin_biosynthesis_fungi_GTP_=>_riboflavin/FMN/FAD	3	3	1369	1602	7	0	0	K01497:273.30|K14654:226.30|K14655:768.07	Thermoprotei:263|Unclassified_Archaea:164|Unclassified_Nitrososphaerota:159|Unclassified_Euryarchaeota:101|Thermococci:84|Unclassified_Thermoproteota:70|Methanomicrobia:53|Thermoplasmata:51|Unclassified_Candidatus_Bathyarchaeota:48|Unclassified_Candidatus_Micrarchaeota:46|Halobacteria:45|Unclassified_Candidatus_Aenigmatarchaeota:41|Unclassified_Candidatus_Woesearchaeota:40|Unclassified_Candidatus…	Halobacteria:613|Methanomicrobia:269|Methanobacteria:237|Unclassified_Nitrososphaerota:105|Unclassified_Euryarchaeota:56|Thermoprotei:48|Methanococci:45|Nitrososphaeria:41|Thermoplasmata:35|Unclassified_Archaea:28|Archaeoglobi:27|Candidatus_Poseidoniia:20|Unclassified_Thermoproteota:18|Unclassified_Candidatus_Marsarchaeota:9|Hadesarchaea:6|Unclassified_Candidatus_Thermoplasmatota:4|Unclassified_C…	Thermoplasmata:2|Unclassified_Euryarchaeota:1|Methanonatronarchaeia:1|Unclassified_Archaea:1|Methanomicrobia:1|Unclassified_Thermoproteota:1	-	-
M00936|Melatonin_biosynthesis_plants_tryptophan_=>_serotonin_=>_melatonin	5	4	2883	89	6	0	0	K01593:364.43|K24541:741.20|K22450:84.97|K22588,K13066:481.87,497.73	Halobacteria:635|Thermoprotei:311|Methanomicrobia:268|Unclassified_Nitrososphaerota:264|Methanobacteria:257|Unclassified_Archaea:193|Unclassified_Euryarchaeota:158|Unclassified_Thermoproteota:89|Thermococci:86|Thermoplasmata:80|Nitrososphaeria:57|Unclassified_Candidatus_Micrarchaeota:49|Methanococci:45|Unclassified_Candidatus_Bathyarchaeota:44|Unclassified_Candidatus_Woesearchaeota:43|Unclassifie…	Methanomicrobia:49|Halobacteria:23|Unclassified_Candidatus_Bathyarchaeota:8|Thermoplasmata:8|Unclassified_Candidatus_Heimdallarchaeota:1	Methanomicrobia:6	-	-
M00538|Toluene_degradation_toluene_=>_benzoate	6	3	2865	108	5	0	0	K15760+K15761+K15763+K15764:301.93+50.30+77.27+302.03|K00055:378.03|K00141:648.70	Halobacteria:586|Methanomicrobia:323|Thermoprotei:271|Unclassified_Nitrososphaerota:264|Methanobacteria:257|Unclassified_Archaea:193|Unclassified_Euryarchaeota:158|Unclassified_Thermoproteota:89|Thermoplasmata:88|Thermococci:86|Nitrososphaeria:57|Unclassified_Candidatus_Bathyarchaeota:52|Unclassified_Candidatus_Micrarchaeota:49|Methanococci:45|Unclassified_Candidatus_Woesearchaeota:43|Unclassifie…	Halobacteria:67|Thermoprotei:40|Unclassified_Candidatus_Geoarchaeota:1	Halobacteria:5	-	-
M00892|UDP-N-acetyl-D-glucosamine_biosynthesis_eukaryotes_glucose_=>_UDP-GlcNAc	8	6	599	2375	4	0	0	K00844,K12407,K00845:103.40,758.20,116.37|K01810:180.10|K00820:180.43|K00621:82.80|K01836:391.73|K00972:398.50	Unclassified_Archaea:100|Unclassified_Euryarchaeota:92|Unclassified_Nitrososphaerota:59|Thermoplasmata:52|Methanomicrobia:45|Unclassified_Candidatus_Micrarchaeota:32|Unclassified_Thermoproteota:25|Unclassified_Candidatus_Bathyarchaeota:21|Candidatus_Poseidoniia:21|Archaeoglobi:19|Thermoprotei:17|Unclassified_Candidatus_Aenigmatarchaeota:15|Halobacteria:12|Unclassified_Candidatus_Woesearchaeota:11…	Halobacteria:646|Thermoprotei:294|Methanomicrobia:278|Methanobacteria:251|Unclassified_Nitrososphaerota:205|Unclassified_Archaea:93|Thermococci:86|Unclassified_Euryarchaeota:66|Unclassified_Thermoproteota:64|Nitrososphaeria:51|Methanococci:45|Thermoplasmata:36|Unclassified_Candidatus_Bathyarchaeota:31|Unclassified_Candidatus_Woesearchaeota:30|Unclassified_Candidatus_Aenigmatarchaeota:26|Archaeogl…	Unclassified_Candidatus_Woesearchaeota:2|Nanohaloarchaea:2	-	-
M00609|Cysteine_biosynthesis_methionine_=>_cysteine	6	6	882	2093	3	0	0	K00789:18.20|K17462:128.47|K01243:108.07|K07173:111.10|K17216:457.23|K17217:602.50	Unclassified_Archaea:126|Unclassified_Euryarchaeota:105|Halobacteria:104|Unclassified_Nitrososphaerota:103|Methanobacteria:88|Unclassified_Thermoproteota:39|Thermoplasmata:36|Unclassified_Candidatus_Aenigmatarchaeota:29|Methanomicrobia:27|Thermoprotei:25|Archaeoglobi:24|Unclassified_Candidatus_Bathyarchaeota:23|Unclassified_Candidatus_Parvarchaeota:23|Candidatus_Poseidoniia:18|Unclassified_Candid…	Halobacteria:554|Methanomicrobia:293|Thermoprotei:286|Methanobacteria:169|Unclassified_Nitrososphaerota:161|Thermococci:85|Unclassified_Archaea:67|Unclassified_Euryarchaeota:53|Thermoplasmata:52|Unclassified_Thermoproteota:50|Methanococci:44|Nitrososphaeria:42|Unclassified_Candidatus_Micrarchaeota:34|Unclassified_Candidatus_Bathyarchaeota:29|Unclassified_Candidatus_Woesearchaeota:27|Unclassified_…	Methanomicrobia:3	-	-
M00778|Type_II_polyketide_backbone_biosynthesis_acyl-CoA_+_malonyl-CoA_=>_polyketide	10	3	2828	147	3	0	0	K05551+K05552+K05553:695.97+554.97+62.97|K05554,K14249,K15884,K15885,K15886:192.77,-,524.40,362.33,-|K05555,K14250,K15886:159.83,296.37,-	Halobacteria:655|Methanomicrobia:323|Unclassified_Nitrososphaerota:264|Methanobacteria:257|Thermoprotei:203|Unclassified_Archaea:189|Unclassified_Euryarchaeota:158|Unclassified_Thermoproteota:88|Thermococci:86|Thermoplasmata:84|Nitrososphaeria:55|Unclassified_Candidatus_Bathyarchaeota:51|Unclassified_Candidatus_Micrarchaeota:49|Methanococci:45|Unclassified_Candidatus_Woesearchaeota:43|Unclassifie…	Thermoprotei:108|Archaeoglobi:10|Unclassified_Candidatus_Lokiarchaeota:4|Unclassified_Archaea:4|Thermoplasmata:4|Unclassified_Candidatus_Thorarchaeota:3|Candidatus_Methanoliparia:3|Unclassified_Candidatus_Heimdallarchaeota:3|Nitrososphaeria:2|Theionarchaea:2|Unclassified_Candidatus_Bathyarchaeota:1|Hadesarchaea:1|Candidatus_Hadarchaeia:1|Unclassified_Thermoproteota:1	Halobacteria:3	-	-
M00866|KDO2-lipid_A_biosynthesis_Raetz_pathway_non-LpxL-LpxM_type	11	9	2828	147	3	0	0	K00677:204.03|K02535,K16363:330.30,406.83|K02536:159.17|K03269,K09949:66.07,104.63|K00748:134.80|K00912:99.00|K02527:156.40|K02517:208.33|K09778:206.10	Halobacteria:607|Methanomicrobia:302|Thermoprotei:300|Methanobacteria:253|Unclassified_Nitrososphaerota:243|Unclassified_Archaea:189|Unclassified_Euryarchaeota:150|Unclassified_Thermoproteota:89|Thermococci:86|Thermoplasmata:86|Unclassified_Candidatus_Micrarchaeota:49|Unclassified_Candidatus_Bathyarchaeota:49|Methanococci:45|Unclassified_Candidatus_Woesearchaeota:43|Nitrososphaeria:42|Unclassifie…	Halobacteria:51|Unclassified_Nitrososphaerota:21|Methanomicrobia:21|Nitrososphaeria:15|Thermoprotei:11|Unclassified_Euryarchaeota:6|Methanobacteria:4|Unclassified_Archaea:3|Unclassified_Candidatus_Bathyarchaeota:3|Thermoplasmata:2|Theionarchaea:2|Unclassified_Candidatus_Thorarchaeota:2|Unclassified_Candidatus_Altiarchaeota:2|Archaeoglobi:1|Unclassified_Candidatus_Heimdallarchaeota:1|Candidatus_Me…	Unclassified_Euryarchaeota:2|Unclassified_Archaea:1	-	-
M00776|Pikromycin/methymycin_biosynthesis_methylmalonyl-CoA_+_malonyl-CoA_=>_narbonolide/10-deoxymethynolide_=>_pikromycin/methymycin	6	4	2786	190	2	0	0	K16000+K16001+K16002:-+-+-|K16004:-|K16005:-|K16006:-	Halobacteria:658|Thermoprotei:311|Unclassified_Nitrososphaerota:262|Methanobacteria:238|Methanomicrobia:215|Unclassified_Archaea:191|Unclassified_Euryarchaeota:140|Thermococci:86|Unclassified_Thermoproteota:81|Thermoplasmata:78|Nitrososphaeria:57|Unclassified_Candidatus_Micrarchaeota:49|Unclassified_Candidatus_Bathyarchaeota:48|Methanococci:45|Unclassified_Candidatus_Woesearchaeota:43|Unclassifie…	Methanomicrobia:106|Methanobacteria:19|Unclassified_Euryarchaeota:18|Thermoplasmata:10|Unclassified_Thermoproteota:8|Unclassified_Candidatus_Altiarchaeota:6|Hadesarchaea:4|Unclassified_Candidatus_Bathyarchaeota:4|Unclassified_Candidatus_Thermoplasmatota:2|Unclassified_Archaea:2|Archaeoglobi:2|Unclassified_Candidatus_Geothermarchaeota:2|Unclassified_Nitrososphaerota:2|Unclassified_Candidatus_Geoar…	Methanomicrobia:2	-	-
M00060|KDO2-lipid_A_biosynthesis_Raetz_pathway_LpxL-LpxM_type	10	9	2829	147	2	0	0	K00677:204.03|K02535:330.30|K02536:159.17|K03269,K09949:66.07,104.63|K00748:134.80|K00912:99.00|K02527:156.40|K02517:208.33|K02560:354.33	Halobacteria:607|Methanomicrobia:303|Thermoprotei:300|Methanobacteria:253|Unclassified_Nitrososphaerota:243|Unclassified_Archaea:189|Unclassified_Euryarchaeota:150|Unclassified_Thermoproteota:89|Thermococci:86|Thermoplasmata:86|Unclassified_Candidatus_Micrarchaeota:49|Unclassified_Candidatus_Bathyarchaeota:49|Methanococci:45|Unclassified_Candidatus_Woesearchaeota:43|Nitrososphaeria:42|Unclassifie…	Halobacteria:51|Unclassified_Nitrososphaerota:21|Methanomicrobia:20|Nitrososphaeria:15|Thermoprotei:11|Unclassified_Euryarchaeota:7|Methanobacteria:4|Unclassified_Archaea:3|Unclassified_Candidatus_Bathyarchaeota:3|Thermoplasmata:2|Theionarchaea:2|Unclassified_Candidatus_Thorarchaeota:2|Unclassified_Candidatus_Altiarchaeota:2|Archaeoglobi:1|Unclassified_Candidatus_Heimdallarchaeota:1|Candidatus_Me…	Unclassified_Archaea:1|Unclassified_Euryarchaeota:1	-	-
M00876|Staphyloferrin_A_biosynthesis_L-ornithine_=>_staphyloferrin_A	3	3	2908	68	2	0	0	K21898:200.73|K23446:562.00|K23447:510.37	Halobacteria:599|Methanomicrobia:323|Thermoprotei:311|Unclassified_Nitrososphaerota:264|Methanobacteria:257|Unclassified_Archaea:192|Unclassified_Euryarchaeota:158|Unclassified_Thermoproteota:89|Thermoplasmata:85|Thermococci:81|Nitrososphaeria:57|Unclassified_Candidatus_Bathyarchaeota:52|Unclassified_Candidatus_Micrarchaeota:49|Methanococci:45|Unclassified_Candidatus_Woesearchaeota:43|Unclassifie…	Halobacteria:57|Thermococci:5|Thermoplasmata:3|Unclassified_Candidatus_Thermoplasmatota:1|Unclassified_Candidatus_Lokiarchaeota:1|Unclassified_Archaea:1	Halobacteria:2	-	-
M00777|Avermectin_biosynthesis_2-methylbutanoyl-CoA/isobutyryl-CoA_=>_68a-Seco-68a-deoxy-5-oxoavermectin_1a/1b_aglycone_=>_avermectin_A1a/B1a/A1b/B1b	8	5	2954	22	2	0	0	K14371+K24567+K24568+K24569:-+-+-+-|K14372:-|K14373:-|K14374:-|K14375:-	Halobacteria:658|Methanomicrobia:323|Thermoprotei:305|Unclassified_Nitrososphaerota:264|Methanobacteria:257|Unclassified_Archaea:191|Unclassified_Euryarchaeota:155|Unclassified_Thermoproteota:89|Thermoplasmata:87|Thermococci:77|Nitrososphaeria:57|Unclassified_Candidatus_Bathyarchaeota:51|Unclassified_Candidatus_Micrarchaeota:49|Methanococci:45|Unclassified_Candidatus_Woesearchaeota:43|Unclassifie…	Thermococci:7|Thermoprotei:6|Unclassified_Euryarchaeota:3|Unclassified_Archaea:2|Unclassified_Candidatus_Thermoplasmatota:1|Unclassified_Candidatus_Heimdallarchaeota:1|Unclassified_Candidatus_Bathyarchaeota:1|Thermoplasmata:1	Thermococci:2	-	-
M00572|Pimeloyl-ACP_biosynthesis_BioC-BioH_pathway_malonyl-ACP_=>_pimeloyl-ACP	10	6	1563	1414	1	0	0	K02169:172.17|K00647,K09458:372.93,478.87|K00059:273.00|K02372:73.03|K00208:263.07|K02170,K09789,K19560,K19561:150.07,129.73,173.63,548.17	Methanomicrobia:216|Methanobacteria:164|Unclassified_Archaea:152|Unclassified_Nitrososphaerota:150|Unclassified_Euryarchaeota:129|Thermoprotei:118|Unclassified_Thermoproteota:73|Thermococci:55|Thermoplasmata:54|Halobacteria:50|Methanococci:45|Unclassified_Candidatus_Micrarchaeota:42|Unclassified_Candidatus_Woesearchaeota:39|Unclassified_Candidatus_Bathyarchaeota:34|Unclassified_Candidatus_Aenigma…	Halobacteria:608|Thermoprotei:193|Unclassified_Nitrososphaerota:114|Methanomicrobia:107|Methanobacteria:93|Unclassified_Archaea:40|Nitrososphaeria:37|Thermoplasmata:34|Thermococci:31|Unclassified_Euryarchaeota:29|Unclassified_Candidatus_Bathyarchaeota:18|Unclassified_Thermoproteota:16|Archaeoglobi:10|Unclassified_Candidatus_Aenigmatarchaeota:8|Unclassified_Candidatus_Micrarchaeota:7|Unclassified_…	Unclassified_Archaea:1	-	-
M00014|Glucuronate_pathway_(uronate_pathway)	12	8	1597	1380	1	0	0	K00012:380.77|K12447,K00699:380.43,154.47|K16190,K01195,K14756:235.13,413.47,1330.17|K00002:472.13|K13247:289.93|K03331:241.13|K05351,K00008:494.70,426.73|K00854:338.00	Thermoprotei:236|Unclassified_Nitrososphaerota:194|Unclassified_Archaea:142|Unclassified_Euryarchaeota:132|Halobacteria:121|Methanomicrobia:116|Methanobacteria:86|Thermoplasmata:73|Unclassified_Thermoproteota:71|Nitrososphaeria:50|Thermococci:47|Unclassified_Candidatus_Micrarchaeota:39|Unclassified_Candidatus_Bathyarchaeota:33|Unclassified_Candidatus_Aenigmatarchaeota:30|Unclassified_Candidatus_P…	Halobacteria:536|Methanomicrobia:207|Methanobacteria:171|Thermoprotei:75|Unclassified_Nitrososphaerota:70|Unclassified_Archaea:51|Thermococci:39|Methanococci:30|Unclassified_Euryarchaeota:26|Unclassified_Candidatus_Woesearchaeota:23|Unclassified_Candidatus_Bathyarchaeota:19|Unclassified_Thermoproteota:18|Unclassified_Candidatus_Altiarchaeota:15|Thermoplasmata:15|Archaeoglobi:14|Unclassified_Candi…	Halobacteria:1	-	-
M00616|Sulfate-sulfur_assimilation	16	4	2009	968	1	0	0	K02048+K02046+K02047+K02045,K23163+K02046+K02047+K02045:508.93+289.27+283.03+433.17,496.97+289.27+283.03+433.17|K13811,K00958+K00860,K00955+K00957,K00956+K00957+K00860:442.93,259.60+336.37,726.83+194.70,540.10+194.70+336.37|K00390,K05907:180.93,463.60|K00380+K00381,K00392:532.37+491.53,571.63	Halobacteria:631|Methanobacteria:257|Unclassified_Archaea:159|Unclassified_Nitrososphaerota:133|Methanomicrobia:126|Unclassified_Euryarchaeota:118|Thermoprotei:102|Unclassified_Thermoproteota:77|Thermoplasmata:57|Unclassified_Candidatus_Bathyarchaeota:37|Unclassified_Candidatus_Aenigmatarchaeota:37|Unclassified_Candidatus_Woesearchaeota:35|Unclassified_Candidatus_Micrarchaeota:28|Unclassified_Can…	Thermoprotei:209|Methanomicrobia:197|Unclassified_Nitrososphaerota:131|Thermococci:84|Nitrososphaeria:44|Methanococci:42|Unclassified_Euryarchaeota:40|Unclassified_Archaea:34|Thermoplasmata:30|Archaeoglobi:28|Halobacteria:27|Unclassified_Candidatus_Micrarchaeota:21|Unclassified_Candidatus_Bathyarchaeota:15|Unclassified_Thermoproteota:12|Unclassified_Candidatus_Marsarchaeota:10|Unclassified_Candid…	Thermoplasmata:1	-	-
M00135|GABA_biosynthesis_eukaryotes_putrescine_=>_GABA	5	3	2558	419	1	0	0	K00657:70.60|K00274:310.83|K00128,K14085,K00149:585.90,788.57,774.50	Halobacteria:480|Thermoprotei:311|Unclassified_Nitrososphaerota:263|Methanobacteria:211|Methanomicrobia:200|Unclassified_Archaea:187|Unclassified_Euryarchaeota:153|Thermococci:86|Unclassified_Thermoproteota:80|Thermoplasmata:78|Nitrososphaeria:56|Unclassified_Candidatus_Micrarchaeota:48|Unclassified_Candidatus_Bathyarchaeota:47|Unclassified_Candidatus_Woesearchaeota:43|Unclassified_Candidatus_Aen…	Halobacteria:177|Methanomicrobia:123|Methanobacteria:46|Methanococci:23|Thermoplasmata:10|Unclassified_Thermoproteota:9|Unclassified_Archaea:6|Unclassified_Candidatus_Bathyarchaeota:5|Unclassified_Euryarchaeota:5|Unclassified_Candidatus_Geoarchaeota:3|Unclassified_Nanoarchaeota:2|Unclassified_Candidatus_Heimdallarchaeota:2|Archaeoglobi:2|Nitrososphaeria:1|Unclassified_Candidatus_Diapherotrites:1|…	Halobacteria:1	-	-
M00568|Catechol_ortho-cleavage_catechol_=>_3-oxoadipate	5	4	2723	254	1	0	0	K03381:351.03|K01856:369.80|K03464:36.07|K01055,K14727:227.73,353.13	Halobacteria:584|Methanomicrobia:312|Unclassified_Nitrososphaerota:263|Methanobacteria:250|Thermoprotei:189|Unclassified_Archaea:183|Unclassified_Euryarchaeota:157|Unclassified_Thermoproteota:86|Thermococci:86|Thermoplasmata:84|Unclassified_Candidatus_Bathyarchaeota:50|Unclassified_Candidatus_Micrarchaeota:49|Nitrososphaeria:48|Methanococci:45|Unclassified_Candidatus_Woesearchaeota:43|Unclassifie…	Thermoprotei:122|Halobacteria:73|Methanomicrobia:11|Unclassified_Archaea:10|Nitrososphaeria:9|Methanobacteria:7|Archaeoglobi:6|Thermoplasmata:4|Unclassified_Thermoproteota:3|Unclassified_Candidatus_Bathyarchaeota:2|Candidatus_Hydrothermarchaeia:1|Hadesarchaea:1|Candidatus_Hadarchaeia:1|Candidatus_Methanomethylicia:1|Unclassified_Euryarchaeota:1|Unclassified_Nitrososphaerota:1|Unclassified_Candida…	Halobacteria:1	-	-
M00824|9-membered_enediyne_core_biosynthesis_malonyl-CoA_=>_3-hydroxyhexadeca-468101214-hexaenoyl-ACP_=>_9-membered_enediyne_core	9	2	2818	159	1	0	0	K15314:845.40|K21160+K21161+K21162+K21163+K21164+K21165+K21166+K21167:403.40+352.97+194.93+177.90+421.93+215.10+912.73+378.70	Halobacteria:516|Methanomicrobia:323|Thermoprotei:311|Unclassified_Nitrososphaerota:261|Methanobacteria:257|Unclassified_Archaea:191|Unclassified_Euryarchaeota:154|Unclassified_Thermoproteota:89|Thermococci:86|Thermoplasmata:84|Nitrososphaeria:56|Unclassified_Candidatus_Bathyarchaeota:51|Unclassified_Candidatus_Micrarchaeota:49|Methanococci:45|Unclassified_Candidatus_Woesearchaeota:43|Unclassifie…	Halobacteria:142|Unclassified_Euryarchaeota:4|Thermoplasmata:4|Unclassified_Nitrososphaerota:3|Unclassified_Archaea:2|Candidatus_Poseidoniia:1|Theionarchaea:1|Candidatus_Nanohaloarchaea:1|Nitrososphaeria:1	Unclassified_Candidatus_Bathyarchaeota:1	-	-
M00540|Benzoate_degradation_cyclohexanecarboxylic_acid_=>pimeloyl-CoA	5	5	2920	57	1	0	0	K04116:596.20|K04117:442.60|K07534:469.37|K07535:308.33|K07536:396.70	Halobacteria:639|Methanomicrobia:323|Thermoprotei:311|Unclassified_Nitrososphaerota:263|Methanobacteria:257|Unclassified_Archaea:184|Unclassified_Euryarchaeota:154|Thermoplasmata:88|Thermococci:86|Unclassified_Thermoproteota:83|Nitrososphaeria:57|Unclassified_Candidatus_Bathyarchaeota:51|Unclassified_Candidatus_Micrarchaeota:49|Methanococci:45|Unclassified_Candidatus_Woesearchaeota:43|Unclassifie…	Halobacteria:18|Unclassified_Archaea:9|Unclassified_Candidatus_Marsarchaeota:9|Archaeoglobi:7|Unclassified_Thermoproteota:6|Unclassified_Euryarchaeota:4|Unclassified_Candidatus_Geoarchaeota:2|Unclassified_Candidatus_Bathyarchaeota:1|Unclassified_Nitrososphaerota:1	Halobacteria:1	-	-
M00161|Photosystem_II	6	1	2976	1	1	0	0	K02703+K02706+K02705+K02704+K02707+K02708:292.63+380.53+407.73+321.97+98.83+78.60	Halobacteria:658|Methanomicrobia:323|Thermoprotei:311|Unclassified_Nitrososphaerota:264|Methanobacteria:257|Unclassified_Archaea:193|Unclassified_Euryarchaeota:157|Unclassified_Thermoproteota:89|Thermoplasmata:87|Thermococci:86|Nitrososphaeria:57|Unclassified_Candidatus_Bathyarchaeota:52|Unclassified_Candidatus_Micrarchaeota:49|Methanococci:45|Unclassified_Candidatus_Woesearchaeota:43|Unclassifie…	Unclassified_Euryarchaeota:1	Thermoplasmata:1	-	-
M00551|Benzoate_degradation_benzoate_=>_catechol_/_methylbenzoate_=>_methylcatechol	4	2	2977	0	1	0	0	K05549+K05550+K05784:580.57+212.83+445.07|K05783:406.60	Halobacteria:658|Methanomicrobia:323|Thermoprotei:311|Unclassified_Nitrososphaerota:263|Methanobacteria:257|Unclassified_Archaea:193|Unclassified_Euryarchaeota:158|Unclassified_Thermoproteota:89|Thermoplasmata:88|Thermococci:86|Nitrososphaeria:57|Unclassified_Candidatus_Bathyarchaeota:52|Unclassified_Candidatus_Micrarchaeota:49|Methanococci:45|Unclassified_Candidatus_Woesearchaeota:43|Unclassifie…	-	Unclassified_Nitrososphaerota:1	-	-
M00825|10-membered_enediyne_core_biosynthesis_malonyl-CoA_=>_3-hydroxyhexadeca-468101214-hexaenoyl-ACP_=>_10-membered_enediyne_core	8	2	2977	0	1	0	0	K15314:845.40|K21168+K21169+K21170+K21171+K21172+K21173+K21174:-+391.90+326.70+688.97+376.40+649.53+719.90	Halobacteria:658|Methanomicrobia:323|Thermoprotei:311|Unclassified_Nitrososphaerota:264|Methanobacteria:257|Unclassified_Archaea:193|Unclassified_Euryarchaeota:158|Unclassified_Thermoproteota:89|Thermoplasmata:88|Thermococci:86|Nitrososphaeria:57|Unclassified_Candidatus_Bathyarchaeota:51|Unclassified_Candidatus_Micrarchaeota:49|Methanococci:45|Unclassified_Candidatus_Woesearchaeota:43|Unclassifie…	-	Unclassified_Candidatus_Bathyarchaeota:1	-	-
M00532|Photorespiration	10	9	533	2445	0	0	0	K01601:330.63|K19269:395.00|K11517:507.47|K03781:81.80|K14272:733.10|K00600:83.83|K00830:405.63|K15893,K15919:526.43,447.13|K15918:111.10	Unclassified_Nitrososphaerota:90|Unclassified_Archaea:82|Unclassified_Euryarchaeota:74|Unclassified_Thermoproteota:40|Unclassified_Candidatus_Woesearchaeota:22|Unclassified_Candidatus_Micrarchaeota:22|Unclassified_Candidatus_Parvarchaeota:20|Unclassified_Candidatus_Aenigmatarchaeota:20|Thermoplasmata:20|Thermoprotei:17|Halobacteria:16|Methanomicrobia:15|Unclassified_Candidatus_Bathyarchaeota:14|U…	Halobacteria:642|Methanomicrobia:308|Thermoprotei:294|Methanobacteria:254|Unclassified_Nitrososphaerota:174|Unclassified_Archaea:111|Thermococci:86|Unclassified_Euryarchaeota:84|Thermoplasmata:68|Unclassified_Thermoproteota:49|Nitrososphaeria:45|Unclassified_Candidatus_Bathyarchaeota:38|Archaeoglobi:33|Methanococci:33|Unclassified_Candidatus_Micrarchaeota:27|Unclassified_Candidatus_Woesearchaeota…	-	-	-
M00620|Incomplete_reductive_citrate_cycle_acetyl-CoA_=>_oxoglutarate	17	7	628	2350	0	0	0	K00169+K00170+K00171+K00172:290.13+313.30+100.10+151.70|K01959+K01960:742.23+765.03|K00024:371.37|K01677+K01678:305.93+225.10|K18209+K18210:646.90+335.93|K01902+K01903:361.23+499.70|K00174+K00175+K00176+K00177:258.93+235.40+69.00+153.33	Unclassified_Archaea:121|Unclassified_Nitrososphaerota:89|Unclassified_Euryarchaeota:84|Methanomicrobia:39|Unclassified_Thermoproteota:35|Unclassified_Candidatus_Woesearchaeota:29|Unclassified_Candidatus_Bathyarchaeota:24|Thermoprotei:23|Unclassified_Candidatus_Aenigmatarchaeota:22|Thermoplasmata:22|Unclassified_Candidatus_Altiarchaeota:18|Unclassified_Candidatus_Micrarchaeota:17|Nitrososphaeria:…	Halobacteria:652|Thermoprotei:288|Methanomicrobia:284|Methanobacteria:257|Unclassified_Nitrososphaerota:175|Thermococci:86|Unclassified_Euryarchaeota:74|Unclassified_Archaea:72|Thermoplasmata:66|Unclassified_Thermoproteota:54|Methanococci:45|Nitrososphaeria:42|Unclassified_Candidatus_Micrarchaeota:32|Unclassified_Candidatus_Bathyarchaeota:28|Archaeoglobi:27|Candidatus_Poseidoniia:21|Unclassified_…	-	-	-
M00141|C1-unit_interconversion_eukaryotes	4	3	688	2290	0	0	0	K00600:83.83|K00288,K13403:1438.80,407.13|K00288,K13402:1438.80,1577.03	Unclassified_Archaea:109|Unclassified_Nitrososphaerota:96|Unclassified_Euryarchaeota:92|Unclassified_Thermoproteota:42|Methanococci:35|Thermoprotei:31|Thermoplasmata:30|Unclassified_Candidatus_Micrarchaeota:28|Methanomicrobia:27|Unclassified_Candidatus_Woesearchaeota:26|Unclassified_Candidatus_Aenigmatarchaeota:25|Unclassified_Candidatus_Parvarchaeota:23|Unclassified_Candidatus_Bathyarchaeota:21|…	Halobacteria:637|Methanomicrobia:296|Thermoprotei:280|Methanobacteria:253|Unclassified_Nitrososphaerota:168|Thermococci:86|Unclassified_Archaea:84|Unclassified_Euryarchaeota:66|Thermoplasmata:58|Unclassified_Thermoproteota:47|Nitrososphaeria:45|Archaeoglobi:32|Unclassified_Candidatus_Bathyarchaeota:31|Unclassified_Candidatus_Micrarchaeota:21|Unclassified_Candidatus_Woesearchaeota:17|Unclassified_…	-	-	-
M00368|Ethylene_biosynthesis_methionine_=>_ethylene	4	3	917	2061	0	0	0	K00789:18.20|K01762,K20772:758.80,715.03|K05933:270.30	Unclassified_Archaea:128|Methanobacteria:106|Unclassified_Euryarchaeota:105|Halobacteria:104|Unclassified_Nitrososphaerota:103|Methanomicrobia:40|Unclassified_Thermoproteota:39|Thermoplasmata:36|Unclassified_Candidatus_Aenigmatarchaeota:29|Thermoprotei:25|Archaeoglobi:24|Unclassified_Candidatus_Bathyarchaeota:23|Unclassified_Candidatus_Parvarchaeota:23|Candidatus_Poseidoniia:18|Unclassified_Candi…	Halobacteria:554|Thermoprotei:286|Methanomicrobia:283|Unclassified_Nitrososphaerota:161|Methanobacteria:151|Thermococci:85|Unclassified_Archaea:65|Unclassified_Euryarchaeota:53|Thermoplasmata:52|Unclassified_Thermoproteota:50|Methanococci:44|Nitrososphaeria:42|Unclassified_Candidatus_Micrarchaeota:34|Unclassified_Candidatus_Bathyarchaeota:29|Unclassified_Candidatus_Woesearchaeota:26|Unclassified_…	-	-	-
M00953|Mugineic_acid_biosynthesis_methionine_=>_3-epihydroxymugineic_acid	5	5	917	2061	0	0	0	K00789:18.20|K05953:196.67|K14271:902.63|K22374:539.03|K18054:397.83	Unclassified_Archaea:128|Methanobacteria:106|Unclassified_Euryarchaeota:105|Halobacteria:104|Unclassified_Nitrososphaerota:103|Methanomicrobia:40|Unclassified_Thermoproteota:39|Thermoplasmata:36|Unclassified_Candidatus_Aenigmatarchaeota:29|Thermoprotei:25|Archaeoglobi:24|Unclassified_Candidatus_Bathyarchaeota:23|Unclassified_Candidatus_Parvarchaeota:23|Candidatus_Poseidoniia:18|Unclassified_Candi…	Halobacteria:554|Thermoprotei:286|Methanomicrobia:283|Unclassified_Nitrososphaerota:161|Methanobacteria:151|Thermococci:85|Unclassified_Archaea:65|Unclassified_Euryarchaeota:53|Thermoplasmata:52|Unclassified_Thermoproteota:50|Methanococci:44|Nitrososphaeria:42|Unclassified_Candidatus_Micrarchaeota:34|Unclassified_Candidatus_Bathyarchaeota:29|Unclassified_Candidatus_Woesearchaeota:26|Unclassified_…	-	-	-
M00117|Ubiquinone_biosynthesis_prokaryotes_chorismate_(+_polyprenyl-PP)_=>_ubiquinol	11	8	1336	1642	0	0	0	K03181,K18240:51.27,318.27|K03179:202.60|K03182+K03186:498.30+148.63|K18800:463.20|K00568:306.87|K03185:424.60|K03183:260.07|K03184,K06134:464.57,65.27	Halobacteria:624|Unclassified_Archaea:158|Unclassified_Nitrososphaerota:83|Unclassified_Euryarchaeota:78|Unclassified_Candidatus_Woesearchaeota:43|Unclassified_Thermoproteota:42|Unclassified_Candidatus_Aenigmatarchaeota:41|Unclassified_Candidatus_Bathyarchaeota:39|Unclassified_Candidatus_Micrarchaeota:36|Methanomicrobia:29|Thermoprotei:24|Unclassified_Candidatus_Parvarchaeota:23|Thermoplasmata:18…	Methanomicrobia:294|Thermoprotei:287|Methanobacteria:255|Unclassified_Nitrososphaerota:181|Thermococci:85|Unclassified_Euryarchaeota:80|Thermoplasmata:70|Unclassified_Thermoproteota:47|Methanococci:45|Nitrososphaeria:44|Unclassified_Archaea:35|Halobacteria:34|Archaeoglobi:34|Candidatus_Poseidoniia:19|Unclassified_Candidatus_Altiarchaeota:17|Unclassified_Candidatus_Micrarchaeota:13|Unclassified_Ca…	-	-	-
M00171|C4-dicarboxylic_acid_cycle_NAD_-_malic_enzyme_type	9	7	1417	1561	0	0	0	K01595:46.33|K14454:630.70|K14455:690.10|K00025,K00026:534.00,515.87|K00028:750.70|K00814,K14272:713.27,733.10|K01006:374.83	Methanobacteria:232|Unclassified_Archaea:140|Unclassified_Euryarchaeota:134|Methanomicrobia:120|Unclassified_Nitrososphaerota:108|Halobacteria:92|Thermoprotei:57|Thermoplasmata:48|Thermococci:47|Methanococci:43|Unclassified_Candidatus_Aenigmatarchaeota:41|Unclassified_Thermoproteota:40|Unclassified_Candidatus_Bathyarchaeota:39|Unclassified_Candidatus_Micrarchaeota:38|Unclassified_Candidatus_Woese…	Halobacteria:566|Thermoprotei:254|Methanomicrobia:203|Unclassified_Nitrososphaerota:156|Unclassified_Archaea:53|Unclassified_Thermoproteota:49|Thermoplasmata:40|Thermococci:39|Nitrososphaeria:35|Methanobacteria:25|Unclassified_Euryarchaeota:24|Archaeoglobi:18|Unclassified_Candidatus_Woesearchaeota:15|Unclassified_Candidatus_Bathyarchaeota:13|Unclassified_Candidatus_Micrarchaeota:11|Unclassified_C…	-	-	-
M00376|3-Hydroxypropionate_bi-cycle	17	9	1437	1541	0	0	0	K02160+K01961+K01962+K01963:88.00+743.67+364.90+371.53|K14468:1761.63|K14469:1888.77|K15052:955.77|K05606:74.00|K01847,K01848+K01849:754.27,798.50+169.47|K14471+K14472:829.63+815.37|K00239+K00240+K00241:651.07+140.63+56.13|K01679:654.27	Methanomicrobia:309|Methanobacteria:250|Unclassified_Archaea:153|Unclassified_Euryarchaeota:100|Unclassified_Nitrososphaerota:94|Thermoprotei:85|Methanococci:45|Unclassified_Candidatus_Woesearchaeota:43|Thermoplasmata:43|Unclassified_Candidatus_Aenigmatarchaeota:41|Unclassified_Thermoproteota:40|Unclassified_Candidatus_Bathyarchaeota:35|Unclassified_Candidatus_Micrarchaeota:31|Unclassified_Candid…	Halobacteria:654|Thermoprotei:226|Unclassified_Nitrososphaerota:170|Thermococci:85|Unclassified_Euryarchaeota:58|Unclassified_Thermoproteota:49|Nitrososphaeria:48|Thermoplasmata:45|Unclassified_Archaea:40|Archaeoglobi:29|Candidatus_Poseidoniia:20|Unclassified_Candidatus_Micrarchaeota:18|Unclassified_Candidatus_Bathyarchaeota:17|Methanomicrobia:14|Unclassified_Candidatus_Marsarchaeota:10|Candidatu…	-	-	-
M00613|Anoxygenic_photosynthesis_in_green_nonsulfur_bacteria	19	10	1437	1541	0	0	0	K08928+K08929:328.17+396.07|K02160+K01961+K01962+K01963:88.00+743.67+364.90+371.53|K14468:1761.63|K14469:1888.77|K15052:955.77|K05606:74.00|K01847,K01848+K01849:754.27,798.50+169.47|K14471+K14472:829.63+815.37|K00239+K00240+K00241:651.07+140.63+56.13|K01679:654.27	Methanomicrobia:309|Methanobacteria:250|Unclassified_Archaea:153|Unclassified_Euryarchaeota:100|Unclassified_Nitrososphaerota:94|Thermoprotei:85|Methanococci:45|Unclassified_Candidatus_Woesearchaeota:43|Thermoplasmata:43|Unclassified_Candidatus_Aenigmatarchaeota:41|Unclassified_Thermoproteota:40|Unclassified_Candidatus_Bathyarchaeota:35|Unclassified_Candidatus_Micrarchaeota:31|Unclassified_Candid…	Halobacteria:654|Thermoprotei:226|Unclassified_Nitrososphaerota:170|Thermococci:85|Unclassified_Euryarchaeota:58|Unclassified_Thermoproteota:49|Nitrososphaeria:48|Thermoplasmata:45|Unclassified_Archaea:40|Archaeoglobi:29|Candidatus_Poseidoniia:20|Unclassified_Candidatus_Micrarchaeota:18|Unclassified_Candidatus_Bathyarchaeota:17|Methanomicrobia:14|Unclassified_Candidatus_Marsarchaeota:10|Candidatu…	-	-	-
M00129|Ascorbate_biosynthesis_animals_glucose-1P_=>_ascorbate	7	7	1491	1487	0	0	0	K00963:77.70|K00012:380.77|K00699:154.47|K01195:413.47|K00002:472.13|K01053:207.03|K00103:391.87	Thermoprotei:214|Unclassified_Nitrososphaerota:196|Unclassified_Archaea:144|Unclassified_Euryarchaeota:124|Halobacteria:123|Methanomicrobia:110|Unclassified_Thermoproteota:71|Thermoplasmata:69|Nitrososphaeria:50|Thermococci:47|Unclassified_Candidatus_Micrarchaeota:39|Unclassified_Candidatus_Bathyarchaeota:34|Unclassified_Candidatus_Aenigmatarchaeota:30|Unclassified_Candidatus_Parvarchaeota:26|Arc…	Halobacteria:535|Methanobacteria:244|Methanomicrobia:213|Thermoprotei:97|Unclassified_Nitrososphaerota:68|Unclassified_Archaea:49|Thermococci:39|Unclassified_Euryarchaeota:34|Methanococci:32|Unclassified_Candidatus_Woesearchaeota:23|Thermoplasmata:19|Unclassified_Candidatus_Bathyarchaeota:18|Unclassified_Thermoproteota:18|Unclassified_Candidatus_Altiarchaeota:16|Archaeoglobi:14|Unclassified_Candi…	-	-	-
M00874|Fatty_acid_biosynthesis_in_mitochondria_fungi	7	6	1576	1402	0	0	0	K11262:1270.53|K03955+K00645:108.20+268.43|K09458:478.87|K00059:273.00|K22541:200.37|K07512:266.63	Methanomicrobia:216|Methanobacteria:164|Unclassified_Archaea:153|Unclassified_Nitrososphaerota:149|Unclassified_Euryarchaeota:140|Thermoprotei:118|Unclassified_Thermoproteota:73|Thermoplasmata:56|Thermococci:55|Halobacteria:50|Methanococci:45|Unclassified_Candidatus_Micrarchaeota:42|Unclassified_Candidatus_Woesearchaeota:36|Unclassified_Candidatus_Bathyarchaeota:34|Unclassified_Candidatus_Aenigma…	Halobacteria:608|Thermoprotei:193|Unclassified_Nitrososphaerota:115|Methanomicrobia:107|Methanobacteria:93|Unclassified_Archaea:40|Nitrososphaeria:37|Thermoplasmata:32|Thermococci:31|Unclassified_Euryarchaeota:18|Unclassified_Candidatus_Bathyarchaeota:18|Unclassified_Thermoproteota:16|Archaeoglobi:10|Unclassified_Candidatus_Aenigmatarchaeota:8|Unclassified_Candidatus_Micrarchaeota:7|Unclassified_…	-	-	-
M00154|Cytochrome_c_oxidase	15	1	1592	1386	0	0	0	K02257+K02262+K02256+K02261+K02263+K02264+K02265+K02266+K02267+K02268+K02270+K02272+K02258+K02259+K02260:119.97+425.07+931.20+327.07+32.97+98.37+37.77+27.70+42.43+44.63+22.73+25.83+73.07+62.70+40.33	Methanomicrobia:319|Methanobacteria:257|Unclassified_Archaea:159|Unclassified_Euryarchaeota:111|Thermococci:85|Unclassified_Nitrososphaerota:62|Thermoprotei:55|Thermoplasmata:50|Unclassified_Candidatus_Micrarchaeota:49|Unclassified_Candidatus_Bathyarchaeota:47|Methanococci:45|Unclassified_Candidatus_Woesearchaeota:43|Unclassified_Candidatus_Aenigmatarchaeota:41|Unclassified_Thermoproteota:40|Halo…	Halobacteria:621|Thermoprotei:256|Unclassified_Nitrososphaerota:202|Nitrososphaeria:54|Unclassified_Thermoproteota:49|Unclassified_Euryarchaeota:47|Thermoplasmata:38|Unclassified_Archaea:34|Archaeoglobi:27|Candidatus_Poseidoniia:18|Unclassified_Candidatus_Marsarchaeota:7|Unclassified_Candidatus_Geoarchaeota:5|Unclassified_Candidatus_Bathyarchaeota:5|Unclassified_Candidatus_Korarchaeota:5|Methanom…	-	-	-
M00569|Catechol_meta-cleavage_catechol_=>_acetyl-CoA_/_4-methylcatechol_=>_propanoyl-CoA	12	7	1638	1340	0	0	0	K00446,K07104:189.60,86.60|K10217,K10216:687.93,272.90|K01821,K10216:31.30,272.90|K01617,K10216:294.57,272.90|K18364,K02554:353.77,303.67|K18365,K01666:549.67,158.37|K18366,K04073:476.03,462.93	Methanomicrobia:249|Halobacteria:220|Unclassified_Archaea:163|Thermoprotei:147|Unclassified_Nitrososphaerota:142|Unclassified_Euryarchaeota:128|Thermoplasmata:73|Unclassified_Thermoproteota:55|Thermococci:50|Unclassified_Candidatus_Micrarchaeota:49|Unclassified_Candidatus_Aenigmatarchaeota:41|Unclassified_Candidatus_Woesearchaeota:38|Unclassified_Candidatus_Bathyarchaeota:31|Unclassified_Candidat…	Halobacteria:438|Methanobacteria:236|Thermoprotei:164|Unclassified_Nitrososphaerota:122|Methanomicrobia:74|Nitrososphaeria:41|Thermococci:36|Unclassified_Thermoproteota:34|Unclassified_Euryarchaeota:30|Unclassified_Archaea:30|Methanococci:24|Unclassified_Candidatus_Bathyarchaeota:21|Archaeoglobi:16|Thermoplasmata:15|Candidatus_Methanofastidiosa:8|Unclassified_Candidatus_Verstraetearchaeota:6|Uncl…	-	-	-
M00957|Lysine_degradation_bacteria_L-lysine_=>_glutarate_=>_succinate/acetyl-CoA	13	9	1958	1020	0	0	0	K00468:608.17|K01506:260.37|K14268,K07250:779.07,647.40|K00135:587.53|K15737,K01041:321.17,559.00|K15737,K00252:321.17,501.00|K15737,K15736,K01692,K01825,K01782:321.17,554.87,318.30,733.43,804.00|K15736,K01825,K01782:554.87,733.43,804.00|K15736,K00626:554.87,489.07	Methanobacteria:257|Unclassified_Nitrososphaerota:254|Methanomicrobia:247|Unclassified_Archaea:177|Thermoprotei:149|Halobacteria:108|Unclassified_Euryarchaeota:103|Thermococci:86|Unclassified_Thermoproteota:69|Nitrososphaeria:55|Thermoplasmata:52|Unclassified_Candidatus_Bathyarchaeota:49|Methanococci:45|Unclassified_Candidatus_Woesearchaeota:43|Unclassified_Candidatus_Aenigmatarchaeota:41|Unclass…	Halobacteria:550|Thermoprotei:162|Methanomicrobia:76|Unclassified_Euryarchaeota:55|Thermoplasmata:36|Archaeoglobi:28|Unclassified_Thermoproteota:20|Candidatus_Poseidoniia:17|Unclassified_Archaea:16|Unclassified_Candidatus_Micrarchaeota:10|Unclassified_Nitrososphaerota:10|Unclassified_Candidatus_Marsarchaeota:9|Unclassified_Candidatus_Geoarchaeota:6|Unclassified_Candidatus_Korarchaeota:5|Candidatu…	-	-	-
M00366|C10-C20_isoprenoid_biosynthesis_plants	4	4	1990	988	0	0	0	K01823:45.03|K14066:414.57|K00787:151.63|K13789:364.53	Methanomicrobia:320|Thermoprotei:311|Methanobacteria:257|Unclassified_Archaea:163|Unclassified_Nitrososphaerota:133|Unclassified_Euryarchaeota:125|Thermococci:86|Thermoplasmata:79|Unclassified_Thermoproteota:63|Methanococci:45|Unclassified_Candidatus_Bathyarchaeota:42|Archaeoglobi:37|Unclassified_Candidatus_Woesearchaeota:32|Unclassified_Candidatus_Micrarchaeota:31|Nitrososphaeria:30|Halobacteria…	Halobacteria:629|Unclassified_Nitrososphaerota:131|Unclassified_Euryarchaeota:33|Unclassified_Archaea:30|Nitrososphaeria:27|Unclassified_Thermoproteota:26|Unclassified_Candidatus_Aenigmatarchaeota:19|Candidatus_Poseidoniia:19|Unclassified_Candidatus_Micrarchaeota:18|Unclassified_Candidatus_Woesearchaeota:11|Unclassified_Candidatus_Marsarchaeota:11|Unclassified_Candidatus_Bathyarchaeota:10|Thermop…	-	-	-
M00367|C10-C20_isoprenoid_biosynthesis_non-plant_eukaryotes	3	3	1991	987	0	0	0	K01823:45.03|K00787:151.63|K00804:244.87	Methanomicrobia:320|Thermoprotei:311|Methanobacteria:257|Unclassified_Archaea:163|Unclassified_Nitrososphaerota:133|Unclassified_Euryarchaeota:126|Thermococci:86|Thermoplasmata:79|Unclassified_Thermoproteota:63|Methanococci:45|Unclassified_Candidatus_Bathyarchaeota:42|Archaeoglobi:37|Unclassified_Candidatus_Woesearchaeota:32|Unclassified_Candidatus_Micrarchaeota:31|Nitrososphaeria:30|Halobacteria…	Halobacteria:629|Unclassified_Nitrososphaerota:131|Unclassified_Euryarchaeota:32|Unclassified_Archaea:30|Nitrososphaeria:27|Unclassified_Thermoproteota:26|Unclassified_Candidatus_Aenigmatarchaeota:19|Candidatus_Poseidoniia:19|Unclassified_Candidatus_Micrarchaeota:18|Unclassified_Candidatus_Woesearchaeota:11|Unclassified_Candidatus_Marsarchaeota:11|Unclassified_Candidatus_Bathyarchaeota:10|Thermop…	-	-	-
M00055|N-glycan_precursor_biosynthesis	13	12	2000	978	0	0	0	K01001:105.03|K07432+K07441:142.67+72.03|K03842:197.23|K03843:189.90|K03844:157.40|K03845:298.87|K03846:278.53|K03847:193.80|K00729:198.57|K03848:275.53|K03849:287.63|K03850:140.87	Halobacteria:653|Unclassified_Nitrososphaerota:257|Methanomicrobia:216|Unclassified_Euryarchaeota:140|Thermoprotei:103|Unclassified_Archaea:95|Thermoplasmata:82|Unclassified_Thermoproteota:74|Nitrososphaeria:56|Methanobacteria:43|Unclassified_Candidatus_Woesearchaeota:34|Archaeoglobi:32|Methanococci:32|Unclassified_Candidatus_Bathyarchaeota:32|Unclassified_Candidatus_Aenigmatarchaeota:23|Candidat…	Methanobacteria:214|Thermoprotei:208|Methanomicrobia:107|Unclassified_Archaea:98|Thermococci:80|Unclassified_Candidatus_Micrarchaeota:39|Unclassified_Candidatus_Bathyarchaeota:20|Unclassified_Candidatus_Aenigmatarchaeota:18|Unclassified_Euryarchaeota:18|Unclassified_Thermoproteota:15|Unclassified_Candidatus_Altiarchaeota:15|Unclassified_Candidatus_Parvarchaeota:13|Methanococci:13|Unclassified_Can…	-	-	-
M00032|Lysine_degradation_lysine_=>_saccharopine_=>_acetoacetyl-CoA	11	7	2051	927	0	0	0	K14157:568.10|K14085:788.57|K00825:463.23|K15791+K00658+K00382:1142.87+450.77+457.27|K00252:501.00|K07514,K00022:901.70,364.97|K07514,K07515,K07511:901.70,857.43,443.20	Methanomicrobia:314|Thermoprotei:278|Methanobacteria:257|Unclassified_Nitrososphaerota:241|Unclassified_Archaea:174|Unclassified_Euryarchaeota:115|Thermococci:86|Unclassified_Thermoproteota:67|Nitrososphaeria:54|Thermoplasmata:54|Unclassified_Candidatus_Bathyarchaeota:48|Methanococci:45|Unclassified_Candidatus_Woesearchaeota:40|Unclassified_Candidatus_Aenigmatarchaeota:39|Halobacteria:35|Unclassi…	Halobacteria:623|Unclassified_Euryarchaeota:43|Thermoplasmata:34|Thermoprotei:33|Unclassified_Nitrososphaerota:23|Unclassified_Thermoproteota:22|Unclassified_Archaea:19|Unclassified_Candidatus_Micrarchaeota:19|Candidatus_Poseidoniia:19|Archaeoglobi:17|Unclassified_Candidatus_Marsarchaeota:10|Methanomicrobia:9|Unclassified_Candidatus_Verstraetearchaeota:7|Unclassified_Candidatus_Lokiarchaeota:6|Ca…	-	-	-
M00097|beta-Carotene_biosynthesis_GGAP_=>_beta-carotene	6	6	2112	866	0	0	0	K02291:171.10|K02293:500.13|K15744:250.90|K00514:419.03|K09835:533.00|K06443:106.20	Methanomicrobia:302|Unclassified_Nitrososphaerota:261|Methanobacteria:239|Unclassified_Archaea:189|Thermoprotei:181|Unclassified_Euryarchaeota:135|Unclassified_Thermoproteota:89|Thermococci:86|Thermoplasmata:77|Nitrososphaeria:57|Unclassified_Candidatus_Bathyarchaeota:51|Methanococci:45|Unclassified_Candidatus_Micrarchaeota:44|Unclassified_Candidatus_Woesearchaeota:43|Unclassified_Candidatus_Aeni…	Halobacteria:627|Thermoprotei:130|Unclassified_Euryarchaeota:23|Methanomicrobia:21|Candidatus_Poseidoniia:18|Methanobacteria:18|Thermoplasmata:11|Unclassified_Candidatus_Micrarchaeota:5|Unclassified_Archaea:4|Unclassified_Nitrososphaerota:3|Unclassified_Candidatus_Thorarchaeota:2|Candidatus_Methanofastidiosa:1|Nanohaloarchaea:1|Unclassified_Candidatus_Parvarchaeota:1|Unclassified_Candidatus_Bathy…	-	-	-
M00921|Cyclooctatin_biosynthesis_dimethylallyl-PP_+_isopentenyl-PP_=>_cyclooctatin	4	4	2140	838	0	0	0	K13787:296.43|K18686:623.63|K22997:639.53|K22998:710.97	Halobacteria:605|Unclassified_Nitrososphaerota:198|Thermoprotei:195|Unclassified_Archaea:174|Methanomicrobia:167|Unclassified_Euryarchaeota:145|Thermoplasmata:73|Unclassified_Thermoproteota:71|Unclassified_Candidatus_Micrarchaeota:48|Methanobacteria:46|Unclassified_Candidatus_Bathyarchaeota:42|Unclassified_Candidatus_Aenigmatarchaeota:41|Unclassified_Candidatus_Woesearchaeota:40|Nitrososphaeria:3…	Methanobacteria:211|Methanomicrobia:156|Thermoprotei:116|Thermococci:84|Unclassified_Nitrososphaerota:66|Halobacteria:53|Nitrososphaeria:20|Unclassified_Archaea:19|Unclassified_Thermoproteota:18|Methanococci:15|Thermoplasmata:15|Unclassified_Euryarchaeota:13|Unclassified_Candidatus_Bathyarchaeota:10|Hadesarchaea:7|Archaeoglobi:6|Candidatus_Methanomethylicia:5|Unclassified_Candidatus_Altiarchaeota…	-	-	-
M00841|Tetrahydrofolate_biosynthesis_mediated_by_PTPS_GTP_=>_THF	5	5	2146	832	0	0	0	K01495:53.90|K22101:223.63|K13941:579.70|K11754:378.93|K13998:629.83	Halobacteria:540|Methanomicrobia:317|Methanobacteria:256|Unclassified_Archaea:152|Unclassified_Nitrososphaerota:137|Unclassified_Euryarchaeota:93|Thermococci:86|Thermoprotei:75|Unclassified_Thermoproteota:66|Methanococci:45|Unclassified_Candidatus_Bathyarchaeota:42|Unclassified_Candidatus_Micrarchaeota:40|Unclassified_Candidatus_Aenigmatarchaeota:40|Archaeoglobi:38|Unclassified_Candidatus_Woesear…	Thermoprotei:236|Unclassified_Nitrososphaerota:127|Halobacteria:118|Unclassified_Euryarchaeota:65|Thermoplasmata:65|Nitrososphaeria:46|Unclassified_Archaea:41|Unclassified_Thermoproteota:23|Candidatus_Poseidoniia:16|Unclassified_Candidatus_Parvarchaeota:14|Unclassified_Candidatus_Woesearchaeota:12|Unclassified_Candidatus_Bathyarchaeota:10|Unclassified_Candidatus_Altiarchaeota:10|Unclassified_Cand…	-	-	-
M00835|Pyocyanine_biosynthesis_chorismate_=>_pyocyanine	7	7	2148	830	0	0	0	K13063:372.03|K20261:315.23|K06998:116.60|K20260:161.83|K20262:227.93|K21103:437.93|K20940:278.97	Thermoprotei:311|Unclassified_Nitrososphaerota:263|Methanomicrobia:237|Methanobacteria:227|Unclassified_Archaea:185|Unclassified_Euryarchaeota:137|Unclassified_Thermoproteota:88|Thermococci:75|Thermoplasmata:74|Nitrososphaeria:57|Unclassified_Candidatus_Micrarchaeota:49|Unclassified_Candidatus_Bathyarchaeota:47|Halobacteria:45|Methanococci:45|Unclassified_Candidatus_Woesearchaeota:43|Unclassified…	Halobacteria:613|Methanomicrobia:86|Methanobacteria:30|Unclassified_Euryarchaeota:21|Thermoplasmata:14|Thermococci:11|Unclassified_Candidatus_Altiarchaeota:10|Unclassified_Archaea:8|Unclassified_Candidatus_Lokiarchaeota:7|Unclassified_Candidatus_Thorarchaeota:5|Candidatus_Methanofastidiosa:5|Unclassified_Candidatus_Bathyarchaeota:5|Unclassified_Candidatus_Heimdallarchaeota:4|Archaeoglobi:3|Theion…	-	-	-
M00840|Tetrahydrofolate_biosynthesis_mediated_by_ribA_and_trpF_GTP_=>_THF	6	6	2223	755	0	0	0	K14652:358.70|K22100:264.03|K01633:91.53|K13941:579.70|K22099:437.63|K00287:56.13	Thermoprotei:309|Methanomicrobia:295|Unclassified_Nitrososphaerota:263|Methanobacteria:257|Unclassified_Archaea:162|Halobacteria:144|Unclassified_Euryarchaeota:124|Unclassified_Thermoproteota:89|Thermoplasmata:83|Nitrososphaeria:57|Unclassified_Candidatus_Bathyarchaeota:51|Methanococci:45|Unclassified_Candidatus_Micrarchaeota:44|Thermococci:34|Unclassified_Candidatus_Aenigmatarchaeota:33|Unclassi…	Halobacteria:514|Thermococci:52|Unclassified_Euryarchaeota:34|Unclassified_Archaea:31|Methanomicrobia:28|Archaeoglobi:27|Candidatus_Poseidoniia:15|Unclassified_Candidatus_Woesearchaeota:11|Unclassified_Candidatus_Aenigmatarchaeota:8|Unclassified_Candidatus_Diapherotrites:6|Nanohaloarchaea:6|Thermoplasmata:5|Unclassified_Candidatus_Micrarchaeota:5|Candidatus_Nanohaloarchaea:3|Thermoprotei:2|Unclas…	-	-	-
M00131|Inositol_phosphate_metabolism_Ins(1345)P4_=>_Ins(134)P3_=>_myo-inositol	4	4	2362	616	0	0	0	K01106:129.00|K01107:188.73|K01109:691.67|K01092:204.47	Methanomicrobia:317|Thermoprotei:310|Methanobacteria:257|Unclassified_Nitrososphaerota:255|Unclassified_Archaea:181|Halobacteria:145|Unclassified_Euryarchaeota:143|Unclassified_Thermoproteota:89|Thermococci:86|Thermoplasmata:73|Nitrososphaeria:54|Unclassified_Candidatus_Bathyarchaeota:51|Methanococci:45|Unclassified_Candidatus_Micrarchaeota:39|Unclassified_Candidatus_Aenigmatarchaeota:39|Archaeog…	Halobacteria:513|Unclassified_Euryarchaeota:15|Thermoplasmata:15|Unclassified_Candidatus_Woesearchaeota:14|Unclassified_Archaea:12|Unclassified_Candidatus_Micrarchaeota:10|Unclassified_Nitrososphaerota:9|Methanomicrobia:6|Candidatus_Methanofastidiosa:5|Unclassified_Candidatus_Diapherotrites:4|Nitrososphaeria:3|Unclassified_Candidatus_Altiarchaeota:2|Unclassified_Candidatus_Aenigmatarchaeota:2|Can…	-	-	-
M00072|N-glycosylation_by_oligosaccharyltransferase	6	1	2404	574	0	0	0	K07151+K12666+K12667+K12668+K12669+K12670:226.20+67.53+62.33+33.77+251.20+203.60	Halobacteria:658|Methanomicrobia:323|Methanobacteria:257|Unclassified_Archaea:158|Unclassified_Euryarchaeota:153|Unclassified_Nitrososphaerota:128|Thermoplasmata:88|Thermococci:85|Thermoprotei:75|Unclassified_Thermoproteota:57|Unclassified_Candidatus_Micrarchaeota:49|Methanococci:45|Unclassified_Candidatus_Woesearchaeota:43|Unclassified_Candidatus_Aenigmatarchaeota:41|Archaeoglobi:37|Unclassified…	Thermoprotei:236|Unclassified_Nitrososphaerota:136|Nitrososphaeria:38|Unclassified_Candidatus_Bathyarchaeota:38|Unclassified_Archaea:35|Unclassified_Thermoproteota:32|Unclassified_Candidatus_Marsarchaeota:10|Unclassified_Candidatus_Lokiarchaeota:7|Candidatus_Methanomethylicia:6|Unclassified_Candidatus_Thorarchaeota:5|Unclassified_Candidatus_Heimdallarchaeota:5|Unclassified_Candidatus_Verstraetear…	-	-	-
M00114|Ascorbate_biosynthesis_plants_fructose-6P_=>_ascorbate	8	8	2439	539	0	0	0	K01809:37.57|K17497:80.43|K00966:292.90|K10046:425.30|K14190:265.07|K10047:380.50|K17744:409.53|K00225:617.53	Halobacteria:658|Unclassified_Nitrososphaerota:262|Methanobacteria:228|Thermoprotei:190|Unclassified_Archaea:179|Unclassified_Euryarchaeota:147|Methanomicrobia:133|Thermoplasmata:72|Unclassified_Thermoproteota:71|Nitrososphaeria:57|Unclassified_Candidatus_Micrarchaeota:49|Methanococci:45|Unclassified_Candidatus_Woesearchaeota:43|Unclassified_Candidatus_Aenigmatarchaeota:41|Unclassified_Candidatus…	Methanomicrobia:190|Thermoprotei:121|Thermococci:83|Methanobacteria:29|Unclassified_Candidatus_Bathyarchaeota:23|Archaeoglobi:18|Unclassified_Thermoproteota:18|Thermoplasmata:16|Unclassified_Archaea:14|Unclassified_Euryarchaeota:11|Unclassified_Candidatus_Lokiarchaeota:7|Candidatus_Methanoliparia:4|Unclassified_Nitrososphaerota:2|Methanonatronarchaeia:1|Candidatus_Methanomethylicia:1|Candidatus_B…	-	-	-
M00373|Ethylmalonyl_pathway	9	9	2460	518	0	0	0	K00626:489.07|K00023:332.43|K17865:170.23|K14446:498.93|K14447:939.40|K14448:525.47|K14449:271.60|K08691:392.17|K14451:402.03	Halobacteria:342|Methanomicrobia:308|Thermoprotei:264|Methanobacteria:257|Unclassified_Nitrososphaerota:253|Unclassified_Archaea:190|Unclassified_Euryarchaeota:132|Unclassified_Thermoproteota:87|Thermococci:86|Thermoplasmata:60|Nitrososphaeria:57|Unclassified_Candidatus_Bathyarchaeota:49|Methanococci:45|Unclassified_Candidatus_Woesearchaeota:43|Unclassified_Candidatus_Aenigmatarchaeota:41|Unclass…	Halobacteria:316|Thermoprotei:47|Thermoplasmata:28|Unclassified_Euryarchaeota:26|Archaeoglobi:24|Methanomicrobia:15|Unclassified_Nitrososphaerota:11|Unclassified_Candidatus_Micrarchaeota:10|Unclassified_Candidatus_Lokiarchaeota:6|Unclassified_Candidatus_Korarchaeota:5|Unclassified_Candidatus_Thorarchaeota:4|Candidatus_Methanoliparia:4|Candidatus_Micrarchaeia:3|Unclassified_Candidatus_Geoarchaeota…	-	-	-
M00973|Anammox_nitrite_+_ammonia_=>_nitrogen	6	3	2468	510	0	0	0	K00368,K15864:187.73,437.97|K20932+K20933+K20934:624.27+753.97+743.53|K20935:1334.77	Halobacteria:366|Methanomicrobia:323|Thermoprotei:309|Methanobacteria:257|Unclassified_Archaea:181|Unclassified_Euryarchaeota:152|Unclassified_Nitrososphaerota:131|Thermoplasmata:87|Thermococci:86|Unclassified_Thermoproteota:75|Unclassified_Candidatus_Bathyarchaeota:52|Unclassified_Candidatus_Micrarchaeota:49|Methanococci:45|Unclassified_Candidatus_Woesearchaeota:41|Unclassified_Candidatus_Aenigm…	Halobacteria:292|Unclassified_Nitrososphaerota:133|Nitrososphaeria:46|Unclassified_Thermoproteota:14|Unclassified_Archaea:12|Unclassified_Euryarchaeota:6|Unclassified_Candidatus_Woesearchaeota:2|Thermoprotei:2|Unclassified_Candidatus_Geoarchaeota:1|Unclassified_Candidatus_Heimdallarchaeota:1|Thermoplasmata:1	-	-	-
M00622|Nicotinate_degradation_nicotinate_=>_fumarate	7	6	2528	450	0	0	0	K18029+K18030:222.13+561.97|K14974:448.33|K18028:291.43|K15357:222.00|K13995:167.30|K01799:76.77	Halobacteria:420|Methanomicrobia:317|Methanobacteria:257|Unclassified_Nitrososphaerota:252|Thermoprotei:242|Unclassified_Archaea:185|Unclassified_Euryarchaeota:155|Unclassified_Thermoproteota:83|Thermoplasmata:79|Nitrososphaeria:57|Unclassified_Candidatus_Micrarchaeota:48|Methanococci:45|Unclassified_Candidatus_Bathyarchaeota:44|Unclassified_Candidatus_Woesearchaeota:43|Unclassified_Candidatus_Ae…	Halobacteria:238|Thermococci:84|Thermoprotei:69|Unclassified_Nitrososphaerota:12|Thermoplasmata:9|Unclassified_Archaea:8|Unclassified_Candidatus_Bathyarchaeota:8|Unclassified_Thermoproteota:6|Methanomicrobia:6|Unclassified_Euryarchaeota:3|Unclassified_Candidatus_Geoarchaeota:1|Theionarchaea:1|Unclassified_Candidatus_Verstraetearchaeota:1|Hadesarchaea:1|Unclassified_Candidatus_Altiarchaeota:1|Uncl…	-	-	-
M00545|Trans-cinnamate_degradation_trans-cinnamate_=>_acetyl-CoA	11	7	2559	419	0	0	0	K05708+K05709+K05710+K00529,K05712:596.83+257.70+107.23+388.93,375.03|K05711,K05712:384.00,375.03|K05713:170.97|K05714:289.87|K02554:303.67|K01666:158.37|K04073:462.93	Halobacteria:601|Methanomicrobia:314|Methanobacteria:256|Thermoprotei:194|Unclassified_Archaea:171|Unclassified_Nitrososphaerota:160|Unclassified_Euryarchaeota:146|Thermococci:85|Thermoplasmata:82|Unclassified_Thermoproteota:70|Unclassified_Candidatus_Micrarchaeota:49|Unclassified_Candidatus_Bathyarchaeota:49|Methanococci:45|Unclassified_Candidatus_Woesearchaeota:43|Unclassified_Candidatus_Aenigm…	Thermoprotei:117|Unclassified_Nitrososphaerota:104|Halobacteria:57|Nitrososphaeria:42|Unclassified_Archaea:22|Unclassified_Thermoproteota:19|Unclassified_Euryarchaeota:12|Unclassified_Candidatus_Marsarchaeota:10|Methanomicrobia:9|Thermoplasmata:6|Archaeoglobi:5|Candidatus_Methanomethylicia:5|Unclassified_Candidatus_Aenigmatarchaeota:3|Unclassified_Candidatus_Bathyarchaeota:3|Unclassified_Candidat…	-	-	-
M00013|Malonate_semialdehyde_pathway_propanoyl-CoA_=>_acetyl-CoA	7	5	2604	374	0	0	0	K00248,K00232:531.20,174.33|K07511,K14729:443.20,476.00|K05605:166.97|K23146:455.73|K00140:507.23	Halobacteria:458|Methanomicrobia:323|Thermoprotei:259|Methanobacteria:257|Unclassified_Nitrososphaerota:255|Unclassified_Archaea:175|Unclassified_Euryarchaeota:139|Thermococci:86|Unclassified_Thermoproteota:84|Thermoplasmata:64|Nitrososphaeria:57|Unclassified_Candidatus_Micrarchaeota:49|Unclassified_Candidatus_Bathyarchaeota:46|Methanococci:45|Unclassified_Candidatus_Woesearchaeota:43|Unclassifie…	Halobacteria:200|Thermoprotei:52|Thermoplasmata:24|Unclassified_Euryarchaeota:19|Unclassified_Archaea:18|Unclassified_Nitrososphaerota:9|Candidatus_Methanofastidiosa:8|Unclassified_Candidatus_Marsarchaeota:8|Unclassified_Candidatus_Verstraetearchaeota:7|Unclassified_Candidatus_Bathyarchaeota:6|Unclassified_Thermoproteota:5|Unclassified_Candidatus_Thorarchaeota:4|Candidatus_Methanomethylicia:4|Unc…	-	-	-
M00956|Lysine_degradation_bacteria_L-lysine_=>_succinate	7	7	2633	345	0	0	0	K01582:1057.57|K09251:508.07|K00137:684.47|K07250:647.40|K00135:587.53|K15737:321.17|K15736:554.87	Halobacteria:395|Thermoprotei:311|Methanomicrobia:261|Unclassified_Nitrososphaerota:260|Methanobacteria:257|Unclassified_Archaea:189|Unclassified_Euryarchaeota:153|Thermoplasmata:88|Unclassified_Thermoproteota:86|Thermococci:86|Nitrososphaeria:56|Unclassified_Candidatus_Bathyarchaeota:52|Unclassified_Candidatus_Micrarchaeota:49|Methanococci:45|Unclassified_Candidatus_Woesearchaeota:43|Unclassifie…	Halobacteria:263|Methanomicrobia:62|Unclassified_Euryarchaeota:5|Unclassified_Archaea:4|Unclassified_Nitrososphaerota:4|Unclassified_Thermoproteota:3|Unclassified_Candidatus_Geoarchaeota:2|Archaeoglobi:1|Nitrososphaeria:1	-	-	-
M00773|Tylosin_biosynthesis_methylmalonyl-CoA_+_malonyl-CoA_=>_tylactone_=>_tylosin	13	8	2704	274	0	0	0	K15988+K24555+K24556+K24557+K24558:-+-+4350.63+-+-|K15989+K15990:-+-|K15992:-|K15991:540.33|K15993:-|K15994:-|K15995:-|K15996:-	Halobacteria:658|Thermoprotei:311|Unclassified_Nitrososphaerota:262|Methanobacteria:207|Methanomicrobia:185|Unclassified_Archaea:182|Unclassified_Euryarchaeota:141|Thermococci:86|Unclassified_Thermoproteota:82|Thermoplasmata:76|Nitrososphaeria:57|Unclassified_Candidatus_Micrarchaeota:48|Unclassified_Candidatus_Bathyarchaeota:46|Methanococci:45|Unclassified_Candidatus_Woesearchaeota:40|Unclassifie…	Methanomicrobia:138|Methanobacteria:50|Unclassified_Euryarchaeota:17|Thermoplasmata:12|Unclassified_Archaea:11|Unclassified_Thermoproteota:7|Unclassified_Candidatus_Bathyarchaeota:6|Unclassified_Candidatus_Marsarchaeota:5|Unclassified_Candidatus_Altiarchaeota:5|Candidatus_Methanomethylicia:4|Unclassified_Candidatus_Woesearchaeota:3|Candidatus_Methanofastidiosa:3|Unclassified_Candidatus_Geothermar…	-	-	-
M00078|Heparan_sulfate_degradation	9	8	2738	240	0	0	0	K07964,K07965:528.13,565.30|K01136:463.13|K01217:280.87|K01565:274.30|K10532:116.57|K01205:309.43|K01195:413.47|K01137:532.77	Halobacteria:499|Methanomicrobia:322|Thermoprotei:269|Unclassified_Nitrososphaerota:260|Methanobacteria:253|Unclassified_Archaea:180|Unclassified_Euryarchaeota:155|Thermoplasmata:88|Thermococci:86|Unclassified_Thermoproteota:85|Nitrososphaeria:57|Unclassified_Candidatus_Micrarchaeota:49|Methanococci:45|Unclassified_Candidatus_Bathyarchaeota:45|Unclassified_Candidatus_Woesearchaeota:43|Unclassifie…	Halobacteria:159|Thermoprotei:42|Unclassified_Archaea:13|Unclassified_Candidatus_Bathyarchaeota:7|Methanobacteria:4|Unclassified_Nitrososphaerota:4|Unclassified_Thermoproteota:4|Unclassified_Candidatus_Lokiarchaeota:3|Unclassified_Euryarchaeota:3|Methanomicrobia:1	-	-	-
M00550|Ascorbate_degradation_ascorbate_=>_D-xylulose-5P	7	5	2749	229	0	0	0	K02821+K02822+K03475:125.63+68.20+155.73|K03476:389.13|K03078:185.07|K03079:154.63|K03077:232.13	Halobacteria:517|Methanomicrobia:320|Thermoprotei:289|Methanobacteria:257|Unclassified_Nitrososphaerota:249|Unclassified_Archaea:182|Unclassified_Euryarchaeota:158|Unclassified_Thermoproteota:88|Thermoplasmata:88|Thermococci:74|Unclassified_Candidatus_Micrarchaeota:49|Nitrososphaeria:46|Methanococci:45|Unclassified_Candidatus_Woesearchaeota:42|Unclassified_Candidatus_Bathyarchaeota:42|Unclassifie…	Halobacteria:141|Thermoprotei:22|Unclassified_Nitrososphaerota:15|Thermococci:12|Nitrososphaeria:11|Unclassified_Archaea:11|Unclassified_Candidatus_Bathyarchaeota:10|Methanomicrobia:3|Unclassified_Thermoproteota:1|Hadesarchaea:1|Candidatus_Methanomethylicia:1|Unclassified_Candidatus_Woesearchaeota:1	-	-	-
M00860|Bacillus_anthracis_pathogenicity_signature_polyglutamic_acid_capsule_biosynthesis	7	7	2755	223	0	0	0	K22976:496.07|K22977:692.70|K22980:380.77|K07282:215.33|K22116:52.43|K01932:149.00|K22981:92.73	Halobacteria:550|Thermoprotei:311|Methanomicrobia:294|Unclassified_Nitrososphaerota:262|Unclassified_Archaea:191|Methanobacteria:182|Unclassified_Euryarchaeota:158|Unclassified_Thermoproteota:88|Thermoplasmata:88|Thermococci:86|Nitrososphaeria:57|Unclassified_Candidatus_Bathyarchaeota:51|Unclassified_Candidatus_Micrarchaeota:49|Methanococci:45|Unclassified_Candidatus_Woesearchaeota:43|Unclassifie…	Halobacteria:108|Methanobacteria:75|Methanomicrobia:29|Unclassified_Candidatus_Korarchaeota:5|Unclassified_Nitrososphaerota:2|Unclassified_Archaea:2|Unclassified_Candidatus_Bathyarchaeota:1|Unclassified_Thermoproteota:1	-	-	-
M00112|Tocopherol/tocotorienol_biosynthesis_homogentisate_+_phytyl/geranylgeranyl-PP_=>_tocopherol/tocotorienol	5	4	2756	222	0	0	0	K09833:289.17|K12502,K18534:249.17,339.40|K09834:88.77|K05928:305.20	Halobacteria:658|Thermoprotei:311|Unclassified_Nitrososphaerota:264|Methanomicrobia:247|Unclassified_Archaea:193|Unclassified_Euryarchaeota:158|Methanobacteria:116|Unclassified_Thermoproteota:89|Thermoplasmata:88|Thermococci:86|Nitrososphaeria:57|Unclassified_Candidatus_Bathyarchaeota:52|Unclassified_Candidatus_Micrarchaeota:49|Methanococci:45|Unclassified_Candidatus_Woesearchaeota:43|Unclassifie…	Methanobacteria:141|Methanomicrobia:76|Unclassified_Candidatus_Lokiarchaeota:4|Unclassified_Candidatus_Heimdallarchaeota:1	-	-	-
M00124|Pyridoxal-P_biosynthesis_erythrose-4P_=>_pyridoxal-P	6	6	2764	214	0	0	0	K03472:491.50|K03473:282.73|K00831:130.07|K00097:422.30|K03474:125.00|K00275:31.77	Halobacteria:653|Thermoprotei:310|Unclassified_Nitrososphaerota:261|Methanobacteria:241|Methanomicrobia:200|Unclassified_Archaea:189|Unclassified_Euryarchaeota:135|Unclassified_Thermoproteota:87|Thermococci:85|Thermoplasmata:73|Nitrososphaeria:57|Unclassified_Candidatus_Bathyarchaeota:51|Unclassified_Candidatus_Micrarchaeota:49|Methanococci:45|Unclassified_Candidatus_Woesearchaeota:42|Unclassifie…	Methanomicrobia:123|Unclassified_Euryarchaeota:23|Methanobacteria:16|Thermoplasmata:15|Candidatus_Poseidoniia:12|Halobacteria:5|Unclassified_Candidatus_Thorarchaeota:4|Unclassified_Archaea:4|Unclassified_Nitrososphaerota:3|Unclassified_Candidatus_Heimdallarchaeota:2|Unclassified_Thermoproteota:2|Unclassified_Candidatus_Bathyarchaeota:1|Unclassified_Candidatus_Woesearchaeota:1|Unclassified_Candida…	-	-	-
M00104|Bile_acid_biosynthesis_cholesterol_=>_cholate/chenodeoxycholate	12	12	2765	213	0	0	0	K00489:635.37|K12408:506.90|K07431:656.00|K00251:595.87|K00037:660.30|K00488:723.60|K08748:928.93|K01796:334.27|K10214:994.80|K12405:788.00|K08764:754.50|K11992:370.50	Halobacteria:485|Methanomicrobia:320|Thermoprotei:311|Unclassified_Nitrososphaerota:262|Methanobacteria:257|Unclassified_Archaea:187|Unclassified_Euryarchaeota:149|Thermoplasmata:88|Unclassified_Thermoproteota:87|Thermococci:86|Nitrososphaeria:57|Unclassified_Candidatus_Bathyarchaeota:49|Unclassified_Candidatus_Micrarchaeota:48|Methanococci:45|Unclassified_Candidatus_Woesearchaeota:43|Unclassifie…	Halobacteria:173|Unclassified_Euryarchaeota:9|Unclassified_Archaea:6|Candidatus_Methanoliparia:5|Unclassified_Candidatus_Lokiarchaeota:4|Methanomicrobia:3|Unclassified_Candidatus_Bathyarchaeota:3|Candidatus_Hadarchaeia:2|Unclassified_Nitrososphaerota:2|Unclassified_Thermoproteota:2|Hadesarchaea:1|Unclassified_Candidatus_Heimdallarchaeota:1|Theionarchaea:1|Unclassified_Candidatus_Micrarchaeota:1	-	-	-
M00919|Ectoine_degradation_ectoine_=>_aspartate	4	4	2783	195	0	0	0	K15783:384.63|K15784:426.50|K15785:609.80|K15786:742.00	Halobacteria:465|Methanomicrobia:323|Thermoprotei:311|Unclassified_Nitrososphaerota:263|Methanobacteria:257|Unclassified_Archaea:192|Unclassified_Euryarchaeota:158|Unclassified_Thermoproteota:89|Thermoplasmata:88|Thermococci:86|Nitrososphaeria:57|Unclassified_Candidatus_Bathyarchaeota:52|Unclassified_Candidatus_Micrarchaeota:49|Methanococci:45|Unclassified_Candidatus_Woesearchaeota:43|Unclassifie…	Halobacteria:193|Unclassified_Nitrososphaerota:1|Unclassified_Archaea:1	-	-	-
M00918|Aerobactin_biosynthesis_lysine_=>_aerobactin	4	4	2823	155	0	0	0	K03897:406.40|K03896:286.07|K03894:572.53|K03895:595.73	Halobacteria:503|Methanomicrobia:323|Thermoprotei:311|Unclassified_Nitrososphaerota:264|Methanobacteria:257|Unclassified_Archaea:193|Unclassified_Euryarchaeota:158|Unclassified_Thermoproteota:89|Thermoplasmata:88|Thermococci:86|Nitrososphaeria:57|Unclassified_Candidatus_Bathyarchaeota:52|Unclassified_Candidatus_Micrarchaeota:49|Methanococci:45|Unclassified_Candidatus_Woesearchaeota:43|Unclassifie…	Halobacteria:155	-	-	-
M00372|Abscisic_acid_biosynthesis_beta-carotene_=>_abscisic_acid	6	5	2842	136	0	0	0	K15746,K15747:118.47,822.80|K09838:396.63|K09840:614.73|K09841:387.17|K09842:2249.13	Halobacteria:658|Methanomicrobia:323|Unclassified_Nitrososphaerota:264|Methanobacteria:257|Unclassified_Archaea:192|Thermoprotei:182|Unclassified_Euryarchaeota:158|Unclassified_Thermoproteota:89|Thermococci:86|Thermoplasmata:82|Nitrososphaeria:57|Unclassified_Candidatus_Bathyarchaeota:52|Unclassified_Candidatus_Micrarchaeota:49|Methanococci:45|Unclassified_Candidatus_Woesearchaeota:43|Unclassifie…	Thermoprotei:129|Thermoplasmata:6|Unclassified_Archaea:1	-	-	-
M00076|Dermatan_sulfate_degradation	5	5	2874	104	0	0	0	K01136:463.13|K01217:280.87|K01135:373.83|K01197:33.87|K01195:413.47	Halobacteria:626|Methanomicrobia:323|Thermoprotei:269|Unclassified_Nitrososphaerota:260|Methanobacteria:257|Unclassified_Archaea:181|Unclassified_Euryarchaeota:156|Thermoplasmata:88|Unclassified_Thermoproteota:86|Thermococci:86|Nitrososphaeria:57|Unclassified_Candidatus_Micrarchaeota:49|Unclassified_Candidatus_Bathyarchaeota:46|Methanococci:45|Unclassified_Candidatus_Woesearchaeota:43|Unclassifie…	Thermoprotei:42|Halobacteria:32|Unclassified_Archaea:12|Unclassified_Candidatus_Bathyarchaeota:6|Unclassified_Nitrososphaerota:4|Unclassified_Candidatus_Lokiarchaeota:3|Unclassified_Thermoproteota:3|Unclassified_Euryarchaeota:2	-	-	-
M00077|Chondroitin_sulfate_degradation	4	4	2875	103	0	0	0	K01135:373.83|K01197:33.87|K01195:413.47|K01132:553.43	Halobacteria:626|Methanomicrobia:323|Thermoprotei:269|Unclassified_Nitrososphaerota:260|Methanobacteria:257|Unclassified_Archaea:181|Unclassified_Euryarchaeota:157|Thermoplasmata:88|Unclassified_Thermoproteota:86|Thermococci:86|Nitrososphaeria:57|Unclassified_Candidatus_Micrarchaeota:49|Unclassified_Candidatus_Bathyarchaeota:46|Methanococci:45|Unclassified_Candidatus_Woesearchaeota:43|Unclassifie…	Thermoprotei:42|Halobacteria:32|Unclassified_Archaea:12|Unclassified_Candidatus_Bathyarchaeota:6|Unclassified_Nitrososphaerota:4|Unclassified_Candidatus_Lokiarchaeota:3|Unclassified_Thermoproteota:3|Unclassified_Euryarchaeota:1	-	-	-
M00726|Cationic_antimicrobial_peptide_(CAMP)_resistance_lysyl-phosphatidylglycerol_(L-PG)_synthase_MprF	3	3	2878	100	0	0	0	K19077:426.53|K19078:368.60|K14205:357.83	Halobacteria:654|Thermoprotei:311|Unclassified_Nitrososphaerota:264|Methanobacteria:257|Methanomicrobia:227|Unclassified_Archaea:193|Unclassified_Euryarchaeota:158|Unclassified_Thermoproteota:89|Thermoplasmata:88|Thermococci:86|Nitrososphaeria:57|Unclassified_Candidatus_Bathyarchaeota:52|Unclassified_Candidatus_Micrarchaeota:49|Methanococci:45|Unclassified_Candidatus_Woesearchaeota:43|Unclassifie…	Methanomicrobia:96|Halobacteria:4	-	-	-
M00595|Thiosulfate_oxidation_by_SOX_complex_thiosulfate_=>_sulfate	5	1	2879	99	0	0	0	K17222+K17223+K17224+K17226+K17227:170.40+84.17+386.70+74.43+78.57	Halobacteria:603|Thermoprotei:311|Methanomicrobia:302|Unclassified_Nitrososphaerota:264|Methanobacteria:241|Unclassified_Archaea:193|Unclassified_Euryarchaeota:154|Unclassified_Thermoproteota:89|Thermoplasmata:88|Thermococci:86|Nitrososphaeria:57|Unclassified_Candidatus_Bathyarchaeota:52|Unclassified_Candidatus_Micrarchaeota:49|Methanococci:45|Unclassified_Candidatus_Woesearchaeota:43|Unclassifie…	Halobacteria:55|Methanomicrobia:21|Methanobacteria:16|Unclassified_Euryarchaeota:4|Theionarchaea:2|Methanonatronarchaeia:1	-	-	-
M00040|Tyrosine_biosynthesis_chorismate_=>_arogenate_=>_tyrosine	8	3	2880	98	0	0	0	K01850,K04092,K14170:134.23,89.87,360.77|K00832,K15849:553.30,601.67|K00220,K24018,K15227:385.10,754.87,293.17	Halobacteria:658|Methanomicrobia:323|Thermoprotei:307|Methanobacteria:257|Unclassified_Nitrososphaerota:252|Unclassified_Archaea:176|Unclassified_Euryarchaeota:155|Thermoplasmata:87|Thermococci:86|Unclassified_Thermoproteota:81|Nitrososphaeria:56|Unclassified_Candidatus_Micrarchaeota:46|Unclassified_Candidatus_Bathyarchaeota:46|Methanococci:45|Unclassified_Candidatus_Woesearchaeota:43|Unclassifie…	Archaeoglobi:27|Unclassified_Archaea:17|Unclassified_Nitrososphaerota:12|Unclassified_Thermoproteota:8|Unclassified_Candidatus_Bathyarchaeota:6|Candidatus_Methanomethylicia:4|Thermoprotei:4|Unclassified_Candidatus_Lokiarchaeota:3|Unclassified_Candidatus_Micrarchaeota:3|Unclassified_Euryarchaeota:3|Unclassified_Candidatus_Altiarchaeota:2|Unclassified_Candidatus_Verstraetearchaeota:1|Conexivisphaer…	-	-	-
M00059|Glycosaminoglycan_biosynthesis_heparan_sulfate_backbone	10	5	2882	96	0	0	0	K02369,K02370:295.87,465.10|K02366,K02367:733.70,645.33|K02368,K02370:1114.90,465.10|K02576,K02577,K02578,K02579:1653.50,1507.17,1802.90,1736.67|K01793:111.70	Halobacteria:645|Methanomicrobia:319|Thermoprotei:311|Unclassified_Nitrososphaerota:262|Methanobacteria:256|Unclassified_Archaea:190|Unclassified_Euryarchaeota:156|Unclassified_Thermoproteota:89|Thermoplasmata:87|Nitrososphaeria:52|Unclassified_Candidatus_Bathyarchaeota:51|Unclassified_Candidatus_Micrarchaeota:48|Unclassified_Candidatus_Woesearchaeota:43|Unclassified_Candidatus_Aenigmatarchaeota:…	Thermococci:46|Halobacteria:13|Methanococci:6|Nitrososphaeria:5|Candidatus_Methanofastidiosa:5|Methanomicrobia:4|Unclassified_Candidatus_Korarchaeota:3|Unclassified_Archaea:3|Unclassified_Nitrososphaerota:2|Unclassified_Candidatus_Hydrothermarchaeota:2|Unclassified_Euryarchaeota:2|Thermoplasmata:1|Unclassified_Candidatus_Micrarchaeota:1|Methanobacteria:1|Unclassified_Candidatus_Heimdallarchaeota:…	-	-	-
M00079|Keratan_sulfate_degradation	4	4	2891	87	0	0	0	K01132:553.43|K12309:785.87|K01137:532.77|K12373:99.47	Halobacteria:630|Methanomicrobia:322|Thermoprotei:294|Unclassified_Nitrososphaerota:260|Methanobacteria:256|Unclassified_Archaea:179|Unclassified_Euryarchaeota:157|Thermoplasmata:88|Thermococci:86|Unclassified_Thermoproteota:85|Nitrososphaeria:57|Unclassified_Candidatus_Micrarchaeota:49|Methanococci:45|Unclassified_Candidatus_Woesearchaeota:43|Unclassified_Candidatus_Bathyarchaeota:42|Unclassifie…	Halobacteria:28|Thermoprotei:17|Unclassified_Archaea:14|Unclassified_Candidatus_Bathyarchaeota:10|Unclassified_Candidatus_Lokiarchaeota:6|Unclassified_Nitrososphaerota:4|Unclassified_Thermoproteota:4|Methanobacteria:1|Methanomicrobia:1|Unclassified_Candidatus_Heimdallarchaeota:1|Unclassified_Euryarchaeota:1	-	-	-
M00848|Aurachin_biosynthesis_anthranilate_=>_aurachin_A	11	8	2905	73	0	0	0	K09460:-|K02078+K14245+K14246+K22798:40.43+-+-+-|K22799:-|K22800:-|K21272:-|K21271:-|K22801:-|K22802:-	Halobacteria:629|Methanomicrobia:322|Thermoprotei:303|Unclassified_Nitrososphaerota:260|Methanobacteria:257|Unclassified_Archaea:183|Unclassified_Euryarchaeota:155|Unclassified_Thermoproteota:89|Thermoplasmata:87|Thermococci:86|Nitrososphaeria:56|Unclassified_Candidatus_Micrarchaeota:49|Unclassified_Candidatus_Bathyarchaeota:45|Methanococci:45|Unclassified_Candidatus_Woesearchaeota:43|Unclassifie…	Halobacteria:29|Unclassified_Archaea:10|Thermoprotei:8|Unclassified_Candidatus_Bathyarchaeota:7|Unclassified_Nitrososphaerota:4|Unclassified_Candidatus_Parvarchaeota:4|Unclassified_Euryarchaeota:3|Unclassified_Candidatus_Lokiarchaeota:1|Thermoplasmata:1|Nitrososphaeria:1|Unclassified_Candidatus_Heimdallarchaeota:1|Unclassified_Candidatus_Thorarchaeota:1|Unclassified_Candidatus_Aenigmatarchaeota:1…	-	-	-
M00537|Xylene_degradation_xylene_=>_methylbenzoate	4	3	2907	71	0	0	0	K15757+K15758:573.90+504.50|K00055:378.03|K00141:648.70	Halobacteria:587|Methanomicrobia:323|Thermoprotei:311|Unclassified_Nitrososphaerota:264|Methanobacteria:257|Unclassified_Archaea:193|Unclassified_Euryarchaeota:158|Unclassified_Thermoproteota:89|Thermoplasmata:88|Thermococci:86|Nitrososphaeria:57|Unclassified_Candidatus_Bathyarchaeota:52|Unclassified_Candidatus_Micrarchaeota:49|Methanococci:45|Unclassified_Candidatus_Woesearchaeota:43|Unclassifie…	Halobacteria:71	-	-	-
M00089|Triacylglycerol_biosynthesis	22	4	2909	69	0	0	0	K00629,K13506,K13507,K00630,K13508:442.53,176.67,160.97,316.23,201.20|K00655,K13509,K13523,K19007,K13513,K13517,K13519,K14674,K22831:119.97,248.97,279.60,270.10,289.47,381.33,431.57,534.23,129.13|K01080,K15728,K18693:214.43,164.50,189.07|K11155,K11160,K14456,K22848,K22849:286.23,551.93,552.60,229.53,143.40	Halobacteria:658|Methanomicrobia:321|Thermoprotei:311|Unclassified_Nitrososphaerota:263|Methanobacteria:256|Unclassified_Archaea:190|Unclassified_Euryarchaeota:134|Unclassified_Thermoproteota:89|Thermococci:86|Thermoplasmata:79|Nitrososphaeria:57|Unclassified_Candidatus_Bathyarchaeota:52|Unclassified_Candidatus_Micrarchaeota:49|Methanococci:45|Unclassified_Candidatus_Aenigmatarchaeota:41|Unclassi…	Unclassified_Euryarchaeota:24|Candidatus_Poseidoniia:14|Thermoplasmata:9|Unclassified_Candidatus_Lokiarchaeota:6|Unclassified_Candidatus_Heimdallarchaeota:3|Unclassified_Candidatus_Woesearchaeota:3|Unclassified_Archaea:3|Unclassified_Nanoarchaeota:2|Methanomicrobia:2|Unclassified_Candidatus_Diapherotrites:1|Methanobacteria:1|Unclassified_Nitrososphaerota:1	-	-	-
M00081|Pectin_degradation	3	3	2915	63	0	0	0	K01051:78.20|K01184:461.83|K01213:525.20	Halobacteria:598|Methanomicrobia:321|Thermoprotei:311|Unclassified_Nitrososphaerota:264|Methanobacteria:257|Unclassified_Archaea:192|Unclassified_Euryarchaeota:158|Unclassified_Thermoproteota:89|Thermoplasmata:88|Thermococci:86|Nitrososphaeria:57|Unclassified_Candidatus_Bathyarchaeota:52|Unclassified_Candidatus_Micrarchaeota:49|Methanococci:45|Unclassified_Candidatus_Woesearchaeota:43|Unclassifie…	Halobacteria:60|Methanomicrobia:2|Unclassified_Archaea:1	-	-	-
M00903|Fosfomycin_biosynthesis_phosphoenolpyruvate_=>_fosfomycin	6	6	2917	61	0	0	0	K23999:646.77|K09459:342.43|K12901:-|K12902:-|K24000:-|K12903:-	Halobacteria:658|Methanomicrobia:318|Thermoprotei:311|Unclassified_Nitrososphaerota:264|Methanobacteria:213|Unclassified_Archaea:189|Unclassified_Euryarchaeota:158|Unclassified_Thermoproteota:88|Thermoplasmata:86|Thermococci:86|Nitrososphaeria:57|Unclassified_Candidatus_Bathyarchaeota:52|Unclassified_Candidatus_Micrarchaeota:49|Methanococci:45|Unclassified_Candidatus_Woesearchaeota:42|Unclassifie…	Methanobacteria:44|Methanomicrobia:5|Unclassified_Archaea:4|Unclassified_Candidatus_Lokiarchaeota:3|Thermoplasmata:2|Unclassified_Thermoproteota:1|Hadesarchaea:1|Unclassified_Candidatus_Woesearchaeota:1	-	-	-
M00042|Catecholamine_biosynthesis_tyrosine_=>_dopamine_=>_noradrenaline_=>_adrenaline	5	4	2918	60	0	0	0	K00505,K00501:161.17,669.97|K01593:364.43|K00503:216.63|K00553:332.53	Halobacteria:632|Thermoprotei:311|Methanomicrobia:307|Unclassified_Nitrososphaerota:260|Methanobacteria:257|Unclassified_Archaea:193|Unclassified_Euryarchaeota:158|Unclassified_Thermoproteota:89|Thermoplasmata:87|Thermococci:86|Nitrososphaeria:53|Unclassified_Candidatus_Micrarchaeota:49|Methanococci:45|Unclassified_Candidatus_Bathyarchaeota:44|Unclassified_Candidatus_Woesearchaeota:43|Unclassifie…	Halobacteria:26|Methanomicrobia:16|Unclassified_Candidatus_Bathyarchaeota:8|Unclassified_Nitrososphaerota:4|Nitrososphaeria:4|Thermoplasmata:1|Unclassified_Candidatus_Heimdallarchaeota:1	-	-	-
M00775|Oleandomycin_biosynthesis_malonyl-CoA_+_methylmalonyl-CoA_=>_88a-deoxyoleandolide_=>_oleandomycin	7	5	2922	56	0	0	0	K16007+K24565+K24566:-+2177.43+-|K16008:-|K16009:-|K13320:-|K16010:-	Halobacteria:658|Thermoprotei:311|Methanomicrobia:300|Unclassified_Nitrososphaerota:264|Methanobacteria:244|Unclassified_Archaea:190|Unclassified_Euryarchaeota:156|Unclassified_Thermoproteota:89|Thermococci:85|Thermoplasmata:84|Nitrososphaeria:57|Unclassified_Candidatus_Bathyarchaeota:51|Unclassified_Candidatus_Micrarchaeota:49|Methanococci:45|Unclassified_Candidatus_Woesearchaeota:42|Unclassifie…	Methanomicrobia:23|Methanobacteria:13|Thermoplasmata:4|Candidatus_Methanofastidiosa:3|Unclassified_Archaea:3|Candidatus_Methanomethylicia:2|Unclassified_Euryarchaeota:2|Unclassified_Candidatus_Aenigmatarchaeota:1|Nanohaloarchaea:1|Thermococci:1|Unclassified_Candidatus_Woesearchaeota:1|Unclassified_Candidatus_Diapherotrites:1|Unclassified_Candidatus_Bathyarchaeota:1	-	-	-
M00969|Fumagillin_biosynthesis_farnesyl-PP_=>_fumagillin	5	5	2924	54	0	0	0	K22569:-|K21295:617.50|K22570:583.10|K22571:469.37|K22572:-	Halobacteria:604|Methanomicrobia:323|Thermoprotei:311|Unclassified_Nitrososphaerota:264|Methanobacteria:257|Unclassified_Archaea:193|Unclassified_Euryarchaeota:158|Unclassified_Thermoproteota:89|Thermoplasmata:88|Thermococci:86|Nitrososphaeria:57|Unclassified_Candidatus_Bathyarchaeota:52|Unclassified_Candidatus_Micrarchaeota:49|Methanococci:45|Unclassified_Candidatus_Woesearchaeota:43|Unclassifie…	Halobacteria:54	-	-	-
M00039|Monolignol_biosynthesis_phenylalanine/tyrosine_=>_monolignol	12	10	2926	52	0	0	0	K10775,K13064:511.40,1437.83|K00487:560.30|K01904:552.33|K13065:360.30|K09754:666.10|K00588:382.53|K09753:374.67|K09755:663.90|K13066:497.73|K00083,K22395:563.87,758.83	Halobacteria:655|Methanomicrobia:323|Thermoprotei:292|Unclassified_Nitrososphaerota:259|Methanobacteria:257|Unclassified_Archaea:187|Unclassified_Euryarchaeota:158|Thermoplasmata:88|Thermococci:86|Unclassified_Thermoproteota:83|Nitrososphaeria:57|Unclassified_Candidatus_Micrarchaeota:49|Unclassified_Candidatus_Bathyarchaeota:47|Methanococci:45|Unclassified_Candidatus_Woesearchaeota:43|Unclassifie…	Thermoprotei:19|Unclassified_Thermoproteota:6|Unclassified_Archaea:6|Unclassified_Nitrososphaerota:5|Unclassified_Candidatus_Bathyarchaeota:5|Halobacteria:3|Archaeoglobi:2|Unclassified_Candidatus_Geoarchaeota:2|Unclassified_Candidatus_Nezhaarchaeota:2|Unclassified_Candidatus_Geothermarchaeota:1|Unclassified_Candidatus_Lokiarchaeota:1	-	-	-
M00137|Flavanone_biosynthesis_phenylalanine_=>_naringenin	5	5	2926	52	0	0	0	K10775:511.40|K00487:560.30|K01904:552.33|K00660:610.80|K01859:100.10	Halobacteria:655|Methanomicrobia:323|Thermoprotei:292|Unclassified_Nitrososphaerota:259|Methanobacteria:257|Unclassified_Archaea:187|Unclassified_Euryarchaeota:158|Thermoplasmata:88|Thermococci:86|Unclassified_Thermoproteota:83|Nitrososphaeria:57|Unclassified_Candidatus_Micrarchaeota:49|Unclassified_Candidatus_Bathyarchaeota:47|Methanococci:45|Unclassified_Candidatus_Woesearchaeota:43|Unclassifie…	Thermoprotei:19|Unclassified_Thermoproteota:6|Unclassified_Archaea:6|Unclassified_Nitrososphaerota:5|Unclassified_Candidatus_Bathyarchaeota:5|Halobacteria:3|Archaeoglobi:2|Unclassified_Candidatus_Geoarchaeota:2|Unclassified_Candidatus_Nezhaarchaeota:2|Unclassified_Candidatus_Geothermarchaeota:1|Unclassified_Candidatus_Lokiarchaeota:1	-	-	-
M00037|Melatonin_biosynthesis_animals_tryptophan_=>_serotonin_=>_melatonin	4	4	2929	49	0	0	0	K00502:755.57|K01593:364.43|K00669:61.47|K00543:429.63	Halobacteria:635|Thermoprotei:311|Methanomicrobia:307|Unclassified_Nitrososphaerota:264|Methanobacteria:257|Unclassified_Archaea:193|Unclassified_Euryarchaeota:158|Unclassified_Thermoproteota:89|Thermoplasmata:87|Thermococci:86|Nitrososphaeria:57|Unclassified_Candidatus_Micrarchaeota:49|Methanococci:45|Unclassified_Candidatus_Bathyarchaeota:44|Unclassified_Candidatus_Woesearchaeota:43|Unclassifie…	Halobacteria:23|Methanomicrobia:16|Unclassified_Candidatus_Bathyarchaeota:8|Thermoplasmata:1|Unclassified_Candidatus_Heimdallarchaeota:1	-	-	-
M00804|Complete_nitrification_comammox_ammonia_=>_nitrite_=>_nitrate	6	3	2929	49	0	0	0	K10944+K10945+K10946:152.33+159.87+134.27|K10535:291.80|K00370+K00371:821.20+381.67	Halobacteria:658|Thermoprotei:303|Methanomicrobia:299|Unclassified_Nitrososphaerota:264|Methanobacteria:257|Unclassified_Archaea:193|Unclassified_Euryarchaeota:155|Unclassified_Thermoproteota:89|Thermoplasmata:88|Thermococci:86|Nitrososphaeria:57|Unclassified_Candidatus_Bathyarchaeota:51|Unclassified_Candidatus_Micrarchaeota:49|Methanococci:45|Unclassified_Candidatus_Woesearchaeota:43|Unclassifie…	Methanomicrobia:24|Archaeoglobi:11|Thermoprotei:8|Unclassified_Euryarchaeota:3|Candidatus_Hydrothermarchaeia:1|Unclassified_Candidatus_Bathyarchaeota:1|Unclassified_Candidatus_Hydrothermarchaeota:1	-	-	-
M00922|CMP-Neu5Ac_biosynthesis	3	3	2931	47	0	0	0	K24257:507.13|K01654:350.63|K00983:284.97	Halobacteria:658|Methanomicrobia:321|Thermoprotei:311|Methanobacteria:256|Unclassified_Nitrososphaerota:235|Unclassified_Archaea:192|Unclassified_Euryarchaeota:157|Unclassified_Thermoproteota:88|Thermoplasmata:88|Thermococci:85|Unclassified_Candidatus_Bathyarchaeota:52|Unclassified_Candidatus_Micrarchaeota:49|Nitrososphaeria:48|Methanococci:45|Unclassified_Candidatus_Woesearchaeota:43|Unclassifie…	Unclassified_Nitrososphaerota:29|Nitrososphaeria:9|Methanomicrobia:2|Unclassified_Thermoproteota:1|Unclassified_Candidatus_Heimdallarchaeota:1|Thermococci:1|Methanonatronarchaeia:1|Unclassified_Archaea:1|Unclassified_Euryarchaeota:1|Methanobacteria:1	-	-	-
M00099|Sphingosine_biosynthesis	11	5	2934	44	0	0	0	K00654:394.30|K04708:225.53|K04709,K04710,K24621,K24622,K23727:271.13,227.07,632.47,674.23,532.90|K04712:170.97|K01441,K12348,K12349:186.40,411.83,118.87	Halobacteria:649|Methanomicrobia:323|Thermoprotei:308|Methanobacteria:257|Unclassified_Nitrososphaerota:249|Unclassified_Archaea:191|Unclassified_Euryarchaeota:157|Thermoplasmata:87|Thermococci:86|Unclassified_Thermoproteota:84|Nitrososphaeria:56|Unclassified_Candidatus_Micrarchaeota:49|Unclassified_Candidatus_Bathyarchaeota:49|Methanococci:45|Unclassified_Candidatus_Woesearchaeota:43|Unclassifie…	Unclassified_Nitrososphaerota:15|Halobacteria:9|Unclassified_Thermoproteota:5|Unclassified_Candidatus_Lokiarchaeota:3|Thermoprotei:3|Unclassified_Candidatus_Bathyarchaeota:3|Unclassified_Archaea:2|Nitrososphaeria:1|Candidatus_Methanoliparia:1|Unclassified_Euryarchaeota:1|Thermoplasmata:1	-	-	-
M00960|Lysine_degradation_bacteria_L-lysine_=>_D-lysine_=>_succinate	10	9	2934	44	0	0	0	K25316,K25317:357.70,403.40|K26064:414.87|K13609:356.50|K26065:471.73|K26061:753.17|K26062:619.80|K25986:478.27|K26063:1327.30|K15737:321.17	Halobacteria:658|Methanomicrobia:316|Thermoprotei:311|Unclassified_Nitrososphaerota:263|Methanobacteria:257|Unclassified_Archaea:192|Unclassified_Euryarchaeota:156|Unclassified_Thermoproteota:89|Thermococci:86|Thermoplasmata:83|Nitrososphaeria:57|Unclassified_Candidatus_Bathyarchaeota:51|Unclassified_Candidatus_Micrarchaeota:49|Unclassified_Candidatus_Woesearchaeota:42|Unclassified_Candidatus_Aen…	Archaeoglobi:11|Methanococci:9|Methanomicrobia:7|Thermoplasmata:5|Unclassified_Candidatus_Lokiarchaeota:2|Unclassified_Euryarchaeota:2|Unclassified_Nitrososphaerota:1|Hadesarchaea:1|Unclassified_Candidatus_Heimdallarchaeota:1|Unclassified_Archaea:1|Theionarchaea:1|Unclassified_Candidatus_Thermoplasmatota:1|Unclassified_Candidatus_Woesearchaeota:1|Unclassified_Candidatus_Bathyarchaeota:1	-	-	-
M00873|Fatty_acid_biosynthesis_in_mitochondria_animals	8	6	2937	41	0	0	0	K18660:452.67|K03955+K00645:108.20+268.43|K09458:478.87|K11539+K13370:315.30+335.50|K22540:168.77|K07512:266.63	Halobacteria:633|Methanomicrobia:322|Thermoprotei:311|Unclassified_Nitrososphaerota:262|Methanobacteria:257|Unclassified_Archaea:191|Unclassified_Euryarchaeota:157|Unclassified_Thermoproteota:89|Thermoplasmata:88|Thermococci:86|Nitrososphaeria:57|Unclassified_Candidatus_Bathyarchaeota:52|Unclassified_Candidatus_Micrarchaeota:49|Methanococci:45|Unclassified_Candidatus_Aenigmatarchaeota:41|Unclassi…	Halobacteria:25|Unclassified_Candidatus_Woesearchaeota:4|Unclassified_Candidatus_Heimdallarchaeota:3|Unclassified_Archaea:2|Unclassified_Candidatus_Lokiarchaeota:2|Unclassified_Nitrososphaerota:2|Methanomicrobia:1|Unclassified_Euryarchaeota:1|Unclassified_Candidatus_Thorarchaeota:1	-	-	-
M00831|Kedarcidin_2-hydroxynaphthoate_moiety_biosynthesis_malonyl-CoA_=>_368-trihydroxy-2-naphthoate_=>_3-hydroxy-78-dimethoxy-6-isopropoxy-2-naphthoyl-CoA	5	5	2938	40	0	0	0	K21221:-|K21222:-|K21223:-|K21224:906.17|K21225:-	Halobacteria:658|Methanomicrobia:308|Thermoprotei:307|Unclassified_Nitrososphaerota:264|Methanobacteria:238|Unclassified_Archaea:193|Unclassified_Euryarchaeota:158|Unclassified_Thermoproteota:89|Thermoplasmata:88|Thermococci:86|Nitrososphaeria:57|Unclassified_Candidatus_Bathyarchaeota:52|Unclassified_Candidatus_Micrarchaeota:49|Methanococci:45|Unclassified_Candidatus_Woesearchaeota:43|Unclassifie…	Methanobacteria:19|Methanomicrobia:15|Thermoprotei:4|Archaeoglobi:2	-	-	-
M00623|Phthalate_degradation_phthalate_=>_protocatechuate	4	3	2939	39	0	0	0	K18068+K18069:342.67+375.70|K18067:237.53|K04102:195.73	Halobacteria:633|Methanomicrobia:322|Thermoprotei:305|Unclassified_Nitrososphaerota:264|Methanobacteria:257|Unclassified_Archaea:192|Unclassified_Euryarchaeota:158|Unclassified_Thermoproteota:88|Thermoplasmata:88|Thermococci:86|Nitrososphaeria:57|Unclassified_Candidatus_Bathyarchaeota:50|Unclassified_Candidatus_Micrarchaeota:49|Methanococci:45|Unclassified_Candidatus_Woesearchaeota:43|Unclassifie…	Halobacteria:25|Thermoprotei:6|Unclassified_Candidatus_Bathyarchaeota:2|Unclassified_Candidatus_Marsarchaeota:2|Methanomicrobia:1|Unclassified_Thermoproteota:1|Unclassified_Archaea:1|Unclassified_Candidatus_Geoarchaeota:1	-	-	-
M00673|Cephamycin_C_biosynthesis_aminoadipate_+_cycteine_+_valine_=>_cephamycin_C	8	8	2940	38	0	0	0	K12743:4791.03|K04126:466.90|K04127:401.53|K12744:614.90|K12745:595.63|K04128:885.67|K18062:441.17|K18063:493.43	Halobacteria:658|Methanomicrobia:323|Thermoprotei:311|Unclassified_Nitrososphaerota:264|Methanobacteria:257|Unclassified_Archaea:192|Unclassified_Euryarchaeota:141|Unclassified_Thermoproteota:88|Thermococci:86|Thermoplasmata:82|Nitrososphaeria:57|Unclassified_Candidatus_Bathyarchaeota:52|Unclassified_Candidatus_Micrarchaeota:49|Methanococci:45|Unclassified_Candidatus_Woesearchaeota:43|Unclassifie…	Unclassified_Euryarchaeota:17|Candidatus_Poseidoniia:13|Thermoplasmata:6|Unclassified_Archaea:1|Unclassified_Thermoproteota:1	-	-	-
M00651|Vancomycin_resistance_D-Ala-D-Lac_type	11	7	2945	33	0	0	0	K18345,K18351:349.17,311.33|K18344,K18352:238.37,330.07|K07260,K18354:67.97,786.37|K18346,K18353:82.17,124.07|K18347:430.80|K15739:552.00|K08641:49.87	Halobacteria:653|Methanomicrobia:322|Thermoprotei:310|Unclassified_Nitrososphaerota:264|Methanobacteria:241|Unclassified_Archaea:190|Unclassified_Euryarchaeota:156|Unclassified_Thermoproteota:89|Thermoplasmata:88|Thermococci:86|Nitrososphaeria:57|Unclassified_Candidatus_Bathyarchaeota:52|Unclassified_Candidatus_Micrarchaeota:48|Methanococci:45|Unclassified_Candidatus_Woesearchaeota:41|Unclassifie…	Methanobacteria:16|Halobacteria:5|Unclassified_Archaea:3|Unclassified_Candidatus_Woesearchaeota:2|Unclassified_Nanoarchaeota:2|Unclassified_Euryarchaeota:2|Unclassified_Candidatus_Micrarchaeota:1|Thermoprotei:1|Methanomicrobia:1	-	-	-
M00030|Lysine_biosynthesis_AAA_pathway_2-oxoglutarate_=>_2-aminoadipate_=>_lysine	9	8	2947	31	0	0	0	K01655:409.90|K17450:1201.47|K01705:587.20|K05824:422.83|K00838:436.93|K00143:946.80|K00293,K24034:719.13,994.53|K00290:148.10	Halobacteria:658|Methanomicrobia:319|Thermoprotei:311|Unclassified_Nitrososphaerota:264|Methanobacteria:257|Unclassified_Archaea:192|Unclassified_Euryarchaeota:157|Unclassified_Thermoproteota:89|Thermococci:86|Thermoplasmata:80|Nitrososphaeria:57|Unclassified_Candidatus_Bathyarchaeota:52|Unclassified_Candidatus_Micrarchaeota:47|Methanococci:45|Unclassified_Candidatus_Woesearchaeota:41|Unclassifie…	Thermoplasmata:8|Unclassified_Candidatus_Thorarchaeota:5|Methanomicrobia:4|Unclassified_Candidatus_Heimdallarchaeota:3|Unclassified_Candidatus_Lokiarchaeota:2|Candidatus_Methanofastidiosa:2|Unclassified_Candidatus_Woesearchaeota:2|Unclassified_Candidatus_Micrarchaeota:2|Unclassified_Candidatus_Diapherotrites:1|Unclassified_Euryarchaeota:1|Unclassified_Archaea:1	-	-	-
M00790|Pyrrolnitrin_biosynthesis_tryptophan_=>_pyrrolnitrin	4	4	2947	31	0	0	0	K14266:401.63|K19981:235.27|K14257:328.53|K19982:240.03	Halobacteria:628|Methanomicrobia:323|Thermoprotei:311|Unclassified_Nitrososphaerota:264|Methanobacteria:257|Unclassified_Archaea:193|Unclassified_Euryarchaeota:157|Unclassified_Thermoproteota:89|Thermoplasmata:88|Thermococci:86|Nitrososphaeria:57|Unclassified_Candidatus_Bathyarchaeota:52|Unclassified_Candidatus_Micrarchaeota:49|Methanococci:45|Unclassified_Candidatus_Woesearchaeota:43|Unclassifie…	Halobacteria:30|Unclassified_Euryarchaeota:1	-	-	-
M00823|Chlortetracycline_biosynthesis_pretetramide_=>_chlortetracycline	9	8	2948	30	0	0	0	K14251:350.97|K14252:606.53|K14253:411.30|K14254:574.13|K14255:453.90|K14256:654.10|K21301:190.00|K14257+K21297:328.53+183.73	Halobacteria:628|Methanomicrobia:323|Thermoprotei:311|Unclassified_Nitrososphaerota:264|Methanobacteria:257|Unclassified_Archaea:193|Unclassified_Euryarchaeota:158|Unclassified_Thermoproteota:89|Thermoplasmata:88|Thermococci:86|Nitrososphaeria:57|Unclassified_Candidatus_Bathyarchaeota:52|Unclassified_Candidatus_Micrarchaeota:49|Methanococci:45|Unclassified_Candidatus_Woesearchaeota:43|Unclassifie…	Halobacteria:30	-	-	-
M00798|dTDP-L-mycarose_biosynthesis	6	5	2949	29	0	0	0	K16435:213.37|K13315:451.33|K13317:542.77|K13316,K16438:287.47,293.73|K13318:427.00	Halobacteria:658|Methanomicrobia:317|Thermoprotei:311|Methanobacteria:256|Unclassified_Nitrososphaerota:248|Unclassified_Archaea:192|Unclassified_Euryarchaeota:156|Unclassified_Thermoproteota:89|Thermoplasmata:88|Thermococci:86|Nitrososphaeria:55|Unclassified_Candidatus_Bathyarchaeota:52|Unclassified_Candidatus_Micrarchaeota:49|Methanococci:45|Unclassified_Candidatus_Woesearchaeota:42|Unclassifie…	Unclassified_Nitrososphaerota:16|Methanomicrobia:6|Unclassified_Euryarchaeota:2|Nitrososphaeria:2|Methanobacteria:1|Unclassified_Archaea:1|Unclassified_Candidatus_Woesearchaeota:1	-	-	-
M00094|Ceramide_biosynthesis	8	4	2952	26	0	0	0	K00654:394.30|K04708:225.53|K04709,K04710,K24621,K24622,K23727:271.13,227.07,632.47,674.23,532.90|K04712:170.97	Halobacteria:658|Methanomicrobia:323|Thermoprotei:311|Methanobacteria:257|Unclassified_Nitrososphaerota:250|Unclassified_Archaea:192|Unclassified_Euryarchaeota:157|Thermoplasmata:88|Thermococci:86|Unclassified_Thermoproteota:84|Nitrososphaeria:56|Unclassified_Candidatus_Bathyarchaeota:52|Unclassified_Candidatus_Micrarchaeota:49|Methanococci:45|Unclassified_Candidatus_Woesearchaeota:43|Unclassifie…	Unclassified_Nitrososphaerota:14|Unclassified_Thermoproteota:5|Unclassified_Candidatus_Lokiarchaeota:3|Unclassified_Archaea:1|Nitrososphaeria:1|Candidatus_Methanoliparia:1|Unclassified_Euryarchaeota:1	-	-	-
M00774|Erythromycin_biosynthesis_propanoyl-CoA_+_methylmalonyl-CoA_=>_deoxyerythronolide_B_=>_erythromycin_A/B	9	6	2955	23	0	0	0	K10817+K24563+K24564:4623.27+5355.43+4849.63|K14366:649.33|K14367:616.80|K14368+K15997:535.47+449.63|K14370:771.90|K14369:-	Halobacteria:658|Methanomicrobia:323|Thermoprotei:305|Unclassified_Nitrososphaerota:264|Methanobacteria:257|Unclassified_Archaea:192|Unclassified_Euryarchaeota:155|Unclassified_Thermoproteota:89|Thermoplasmata:87|Thermococci:77|Nitrososphaeria:57|Unclassified_Candidatus_Bathyarchaeota:51|Unclassified_Candidatus_Micrarchaeota:49|Methanococci:45|Unclassified_Candidatus_Woesearchaeota:43|Unclassifie…	Thermococci:9|Thermoprotei:6|Unclassified_Euryarchaeota:3|Unclassified_Candidatus_Thermoplasmatota:1|Unclassified_Archaea:1|Unclassified_Candidatus_Heimdallarchaeota:1|Unclassified_Candidatus_Bathyarchaeota:1|Thermoplasmata:1	-	-	-
M00799|dTDP-L-oleandrose_biosynthesis	5	5	2956	22	0	0	0	K16435:213.37|K13315:451.33|K16438:293.73|K19856:410.27|K19857:-	Halobacteria:658|Methanomicrobia:322|Thermoprotei:311|Methanobacteria:256|Unclassified_Nitrososphaerota:248|Unclassified_Archaea:193|Unclassified_Euryarchaeota:157|Unclassified_Thermoproteota:89|Thermoplasmata:88|Thermococci:86|Nitrososphaeria:55|Unclassified_Candidatus_Bathyarchaeota:52|Unclassified_Candidatus_Micrarchaeota:49|Methanococci:45|Unclassified_Candidatus_Woesearchaeota:42|Unclassifie…	Unclassified_Nitrososphaerota:16|Nitrososphaeria:2|Methanomicrobia:1|Unclassified_Euryarchaeota:1|Methanobacteria:1|Unclassified_Candidatus_Woesearchaeota:1	-	-	-
M00800|dTDP-L-megosamine_biosynthesis	5	5	2958	20	0	0	0	K16435:213.37|K16436:524.37|K13326:298.63|K16438:293.73|K13322:-	Halobacteria:658|Methanomicrobia:323|Thermoprotei:311|Methanobacteria:257|Unclassified_Nitrososphaerota:248|Unclassified_Archaea:193|Unclassified_Euryarchaeota:157|Unclassified_Thermoproteota:89|Thermoplasmata:88|Thermococci:86|Nitrososphaeria:55|Unclassified_Candidatus_Bathyarchaeota:52|Unclassified_Candidatus_Micrarchaeota:49|Methanococci:45|Unclassified_Candidatus_Woesearchaeota:42|Unclassifie…	Unclassified_Nitrososphaerota:16|Nitrososphaeria:2|Unclassified_Euryarchaeota:1|Unclassified_Candidatus_Woesearchaeota:1	-	-	-
M00801|dTDP-L-olivose_biosynthesis	4	4	2958	20	0	0	0	K16435:213.37|K13327:355.53|K19858:-|K13319:-	Halobacteria:658|Methanomicrobia:323|Thermoprotei:311|Methanobacteria:257|Unclassified_Nitrososphaerota:248|Unclassified_Archaea:193|Unclassified_Euryarchaeota:157|Unclassified_Thermoproteota:89|Thermoplasmata:88|Thermococci:86|Nitrososphaeria:55|Unclassified_Candidatus_Bathyarchaeota:52|Unclassified_Candidatus_Micrarchaeota:49|Methanococci:45|Unclassified_Candidatus_Woesearchaeota:42|Unclassifie…	Unclassified_Nitrososphaerota:16|Nitrososphaeria:2|Unclassified_Euryarchaeota:1|Unclassified_Candidatus_Woesearchaeota:1	-	-	-
M00802|dTDP-D-forosamine_biosynthesis	5	5	2958	20	0	0	0	K16435:213.37|K13327:355.53|K13328:728.90|K13329:577.30|K13330:399.23	Halobacteria:658|Methanomicrobia:323|Thermoprotei:311|Methanobacteria:257|Unclassified_Nitrososphaerota:248|Unclassified_Archaea:193|Unclassified_Euryarchaeota:157|Unclassified_Thermoproteota:89|Thermoplasmata:88|Thermococci:86|Nitrososphaeria:55|Unclassified_Candidatus_Bathyarchaeota:52|Unclassified_Candidatus_Micrarchaeota:49|Methanococci:45|Unclassified_Candidatus_Woesearchaeota:42|Unclassifie…	Unclassified_Nitrososphaerota:16|Nitrososphaeria:2|Unclassified_Euryarchaeota:1|Unclassified_Candidatus_Woesearchaeota:1	-	-	-
M00803|dTDP-D-angolosamine_biosynthesis	4	4	2958	20	0	0	0	K16435:213.37|K19859:-|K16436:524.37|K13332:-	Halobacteria:658|Methanomicrobia:323|Thermoprotei:311|Methanobacteria:257|Unclassified_Nitrososphaerota:248|Unclassified_Archaea:193|Unclassified_Euryarchaeota:157|Unclassified_Thermoproteota:89|Thermoplasmata:88|Thermococci:86|Nitrososphaeria:55|Unclassified_Candidatus_Bathyarchaeota:52|Unclassified_Candidatus_Micrarchaeota:49|Methanococci:45|Unclassified_Candidatus_Woesearchaeota:42|Unclassifie…	Unclassified_Nitrososphaerota:16|Nitrososphaeria:2|Unclassified_Euryarchaeota:1|Unclassified_Candidatus_Woesearchaeota:1	-	-	-
M00544|Carbazole_degradation_carbazole_=>_2-oxopent-4-enoate_+_anthranilate	4	3	2963	15	0	0	0	K15751:559.70|K15754+K15755:35.13+317.20|K15756:374.90	Halobacteria:658|Methanomicrobia:323|Thermoprotei:298|Unclassified_Nitrososphaerota:263|Methanobacteria:257|Unclassified_Archaea:193|Unclassified_Euryarchaeota:157|Unclassified_Thermoproteota:89|Thermoplasmata:88|Thermococci:86|Nitrososphaeria:57|Unclassified_Candidatus_Bathyarchaeota:52|Unclassified_Candidatus_Micrarchaeota:49|Methanococci:45|Unclassified_Candidatus_Woesearchaeota:43|Unclassifie…	Thermoprotei:13|Unclassified_Euryarchaeota:1|Unclassified_Nitrososphaerota:1	-	-	-
M00162|Cytochrome_b6f_complex	8	1	2963	15	0	0	0	K02635+K02637+K02634+K02636+K02642+K02643+K03689+K02640:317.53+94.33+212.53+110.23+28.63+38.63+36.77+57.13	Halobacteria:658|Methanomicrobia:323|Thermoprotei:299|Unclassified_Nitrososphaerota:264|Methanobacteria:257|Unclassified_Archaea:193|Unclassified_Euryarchaeota:158|Unclassified_Thermoproteota:89|Thermoplasmata:88|Thermococci:86|Nitrososphaeria:57|Unclassified_Candidatus_Bathyarchaeota:52|Unclassified_Candidatus_Micrarchaeota:49|Methanococci:45|Unclassified_Candidatus_Woesearchaeota:43|Unclassifie…	Thermoprotei:12|Archaeoglobi:2|Candidatus_Hydrothermarchaeia:1	-	-	-
M00939|Pyrimidine_degradation_uracil_=>_3-hydroxypropanoate	7	5	2964	14	0	0	0	K09018+K09024:332.00+218.17|K09020:219.67|K09021:141.73|K09023:199.73|K09019,K16066:130.13,374.67	Halobacteria:657|Methanomicrobia:322|Thermoprotei:311|Unclassified_Nitrososphaerota:263|Methanobacteria:257|Unclassified_Archaea:193|Unclassified_Euryarchaeota:157|Unclassified_Thermoproteota:89|Thermoplasmata:87|Thermococci:86|Unclassified_Candidatus_Bathyarchaeota:52|Nitrososphaeria:49|Unclassified_Candidatus_Micrarchaeota:49|Methanococci:45|Unclassified_Candidatus_Woesearchaeota:43|Unclassifie…	Nitrososphaeria:8|Unclassified_Nitrososphaerota:1|Halobacteria:1|Thermoplasmata:1|Methanomicrobia:1|Archaeoglobi:1|Unclassified_Euryarchaeota:1	-	-	-
M00872|O-glycan_biosynthesis_mannose_type_(core_M3)	4	4	2964	14	0	0	0	K00728:135.67|K18207:363.33|K09654:175.17|K17547:156.93	Halobacteria:658|Methanomicrobia:319|Thermoprotei:311|Unclassified_Nitrososphaerota:264|Methanobacteria:257|Unclassified_Archaea:192|Unclassified_Euryarchaeota:158|Unclassified_Thermoproteota:88|Thermoplasmata:88|Thermococci:86|Nitrososphaeria:57|Unclassified_Candidatus_Micrarchaeota:49|Methanococci:45|Unclassified_Candidatus_Bathyarchaeota:44|Unclassified_Candidatus_Woesearchaeota:43|Unclassifie…	Unclassified_Candidatus_Bathyarchaeota:8|Methanomicrobia:4|Unclassified_Archaea:1|Unclassified_Thermoproteota:1	-	-	-
M00856|Salmonella_enterica_pathogenicity_signature_typhoid_toxin	4	4	2967	11	0	0	0	K11014:79.93|K11023:113.67|K19298:113.17|K22918:413.97	Halobacteria:658|Methanomicrobia:323|Thermoprotei:311|Unclassified_Nitrososphaerota:264|Methanobacteria:257|Unclassified_Archaea:193|Unclassified_Euryarchaeota:158|Unclassified_Thermoproteota:89|Thermoplasmata:88|Thermococci:86|Nitrososphaeria:56|Unclassified_Candidatus_Bathyarchaeota:52|Unclassified_Candidatus_Micrarchaeota:49|Unclassified_Candidatus_Woesearchaeota:43|Unclassified_Candidatus_Aen…	Methanococci:10|Nitrososphaeria:1	-	-	-
M00974|Betaine_metabolism_animals_betaine_=>_glycine	4	3	2971	7	0	0	0	K00544:333.77|K00315:780.73|K00306,K00314:325.30,688.87	Halobacteria:658|Methanomicrobia:323|Thermoprotei:311|Unclassified_Nitrososphaerota:263|Methanobacteria:257|Unclassified_Archaea:193|Unclassified_Euryarchaeota:153|Unclassified_Thermoproteota:89|Thermoplasmata:88|Thermococci:86|Nitrososphaeria:57|Unclassified_Candidatus_Bathyarchaeota:52|Unclassified_Candidatus_Micrarchaeota:49|Methanococci:45|Unclassified_Candidatus_Woesearchaeota:43|Unclassifie…	Unclassified_Euryarchaeota:5|Unclassified_Candidatus_Heimdallarchaeota:1|Unclassified_Nitrososphaerota:1	-	-	-
M00047|Creatine_pathway	3	3	2972	6	0	0	0	K00613:149.93|K00542:128.23|K00933:421.17	Halobacteria:658|Methanomicrobia:323|Thermoprotei:311|Unclassified_Nitrososphaerota:263|Methanobacteria:257|Unclassified_Archaea:190|Unclassified_Euryarchaeota:158|Unclassified_Thermoproteota:89|Thermoplasmata:86|Thermococci:86|Nitrososphaeria:57|Unclassified_Candidatus_Bathyarchaeota:52|Unclassified_Candidatus_Micrarchaeota:49|Methanococci:45|Unclassified_Candidatus_Woesearchaeota:43|Unclassifie…	Unclassified_Archaea:3|Thermoplasmata:2|Unclassified_Nitrososphaerota:1	-	-	-
M00151|Cytochrome_bc1_complex_respiratory_unit	10	1	2972	6	0	0	0	K00412+K00413+K00411,K00410+K00411,K03886+K03887+K03888,K03890+K03891+K03889:313.83+58.97+75.73,730.23+75.73,123.97+279.67+172.73,179.67+472.60+161.33	Halobacteria:658|Methanomicrobia:318|Thermoprotei:311|Unclassified_Nitrososphaerota:264|Methanobacteria:257|Unclassified_Archaea:193|Unclassified_Euryarchaeota:158|Unclassified_Thermoproteota:89|Thermoplasmata:88|Thermococci:86|Nitrososphaeria:57|Unclassified_Candidatus_Bathyarchaeota:52|Unclassified_Candidatus_Micrarchaeota:49|Methanococci:45|Unclassified_Candidatus_Woesearchaeota:43|Unclassifie…	Methanomicrobia:5|Archaeoglobi:1	-	-	-
M00101|Cholesterol_biosynthesis_squalene_23-epoxide_=>_cholesterol	11	10	2973	5	0	0	0	K01852:1005.90|K05917:304.00|K00222,K19532:720.90,709.73|K07750:330.50|K07748:415.43|K13373:254.63|K09828:247.07|K01824:83.87|K00227:135.00|K00213:429.87	Halobacteria:658|Methanomicrobia:323|Thermoprotei:311|Unclassified_Nitrososphaerota:264|Methanobacteria:257|Unclassified_Archaea:190|Unclassified_Euryarchaeota:158|Unclassified_Thermoproteota:89|Thermoplasmata:86|Thermococci:86|Nitrososphaeria:57|Unclassified_Candidatus_Bathyarchaeota:52|Unclassified_Candidatus_Micrarchaeota:49|Methanococci:45|Unclassified_Candidatus_Woesearchaeota:43|Unclassifie…	Unclassified_Archaea:3|Thermoplasmata:2	-	-	-
M00575|Pertussis_pathogenicity_signature_T1SS	5	5	2973	5	0	0	0	K22944:3963.67|K11004:968.67|K07389:47.07|K11003:348.20|K12340:240.80	Halobacteria:658|Methanomicrobia:323|Thermoprotei:311|Unclassified_Nitrososphaerota:264|Methanobacteria:257|Unclassified_Archaea:193|Unclassified_Euryarchaeota:155|Unclassified_Thermoproteota:89|Thermoplasmata:88|Thermococci:86|Nitrososphaeria:57|Unclassified_Candidatus_Bathyarchaeota:52|Unclassified_Candidatus_Micrarchaeota:49|Methanococci:45|Unclassified_Candidatus_Woesearchaeota:43|Unclassifie…	Unclassified_Euryarchaeota:3|Unclassified_Candidatus_Altiarchaeota:2	-	-	-
M00697|Multidrug_resistance_efflux_pump_MdtEF-TolC	4	2	2973	5	0	0	0	K07690:236.70|K18898+K18899+K12340:520.07+2115.97+240.80	Halobacteria:658|Methanomicrobia:323|Thermoprotei:311|Unclassified_Nitrososphaerota:264|Methanobacteria:257|Unclassified_Archaea:193|Unclassified_Euryarchaeota:155|Unclassified_Thermoproteota:89|Thermoplasmata:88|Thermococci:86|Nitrososphaeria:57|Unclassified_Candidatus_Bathyarchaeota:52|Unclassified_Candidatus_Micrarchaeota:49|Methanococci:45|Unclassified_Candidatus_Woesearchaeota:43|Unclassifie…	Unclassified_Euryarchaeota:3|Unclassified_Candidatus_Altiarchaeota:2	-	-	-
M00696|Multidrug_resistance_efflux_pump_AcrEF-TolC	4	2	2973	5	0	0	0	K18140:250.93|K18141+K18142+K12340:564.50+2139.97+240.80	Halobacteria:658|Methanomicrobia:323|Thermoprotei:311|Unclassified_Nitrososphaerota:264|Methanobacteria:257|Unclassified_Archaea:193|Unclassified_Euryarchaeota:155|Unclassified_Thermoproteota:89|Thermoplasmata:88|Thermococci:86|Nitrososphaeria:57|Unclassified_Candidatus_Bathyarchaeota:52|Unclassified_Candidatus_Micrarchaeota:49|Methanococci:45|Unclassified_Candidatus_Woesearchaeota:43|Unclassifie…	Unclassified_Euryarchaeota:3|Unclassified_Candidatus_Altiarchaeota:2	-	-	-
M00085|Fatty_acid_elongation_in_mitochondria	6	4	2974	4	0	0	0	K07508,K07509:551.77,571.17|K00022,K07515:364.97,857.43|K07511,K07515:443.20,857.43|K07512:266.63	Halobacteria:658|Methanomicrobia:323|Thermoprotei:311|Unclassified_Nitrososphaerota:264|Methanobacteria:257|Unclassified_Archaea:193|Unclassified_Euryarchaeota:157|Unclassified_Thermoproteota:89|Thermoplasmata:88|Thermococci:86|Nitrososphaeria:57|Unclassified_Candidatus_Bathyarchaeota:52|Unclassified_Candidatus_Micrarchaeota:49|Methanococci:45|Unclassified_Candidatus_Woesearchaeota:43|Unclassifie…	Unclassified_Candidatus_Heimdallarchaeota:2|Unclassified_Candidatus_Lokiarchaeota:1|Unclassified_Euryarchaeota:1	-	-	-
M00418|Toluene_degradation_anaerobic_toluene_=>_benzoyl-CoA	9	6	2974	4	0	0	0	K07540:502.07|K07543+K07544:365.37+461.77|K07545:666.37|K07546:288.93|K07547+K07548:470.23+428.73|K07549+K07550:179.33+471.00	Halobacteria:656|Methanomicrobia:323|Thermoprotei:311|Unclassified_Nitrososphaerota:264|Methanobacteria:257|Unclassified_Archaea:193|Unclassified_Euryarchaeota:157|Unclassified_Thermoproteota:88|Thermoplasmata:88|Thermococci:86|Nitrososphaeria:57|Unclassified_Candidatus_Bathyarchaeota:52|Unclassified_Candidatus_Micrarchaeota:49|Methanococci:45|Unclassified_Candidatus_Woesearchaeota:43|Unclassifie…	Halobacteria:2|Unclassified_Thermoproteota:1|Unclassified_Euryarchaeota:1	-	-	-
M00718|Multidrug_resistance_efflux_pump_MexAB-OprM	4	2	2974	4	0	0	0	K18131:139.73|K03585+K18138+K18139:261.03+1105.10+422.37	Halobacteria:658|Methanomicrobia:323|Thermoprotei:311|Unclassified_Nitrososphaerota:263|Methanobacteria:257|Unclassified_Archaea:191|Unclassified_Euryarchaeota:158|Unclassified_Thermoproteota:89|Thermoplasmata:87|Thermococci:86|Nitrososphaeria:57|Unclassified_Candidatus_Bathyarchaeota:52|Unclassified_Candidatus_Micrarchaeota:49|Methanococci:45|Unclassified_Candidatus_Woesearchaeota:43|Unclassifie…	Unclassified_Archaea:2|Thermoplasmata:1|Unclassified_Nitrososphaerota:1	-	-	-
M00725|Cationic_antimicrobial_peptide_(CAMP)_resistance_dltABCD_operon	6	3	2974	4	0	0	0	K19077:426.53|K19078:368.60|K03367+K03739+K14188+K03740:600.30+276.40+58.97+160.63	Halobacteria:658|Methanomicrobia:321|Thermoprotei:311|Unclassified_Nitrososphaerota:264|Methanobacteria:257|Unclassified_Archaea:192|Unclassified_Euryarchaeota:158|Unclassified_Thermoproteota:89|Thermoplasmata:88|Thermococci:86|Nitrososphaeria:57|Unclassified_Candidatus_Bathyarchaeota:52|Unclassified_Candidatus_Micrarchaeota:49|Methanococci:45|Unclassified_Candidatus_Woesearchaeota:43|Unclassifie…	Methanomicrobia:2|Unclassified_Candidatus_Hydrothermarchaeota:1|Unclassified_Archaea:1	-	-	-
M00783|Tetracenomycin_C/8-demethyltetracenomycin_C_biosynthesis_tetracenomycin_F2_=>_tetracenomycin_C/8-demethyltetracenomycin_C	5	5	2975	3	0	0	0	K15968:172.07|K15969:-|K15886:-|K15971:-|K15972:630.50	Halobacteria:655|Methanomicrobia:323|Thermoprotei:311|Unclassified_Nitrososphaerota:264|Methanobacteria:257|Unclassified_Archaea:193|Unclassified_Euryarchaeota:158|Unclassified_Thermoproteota:89|Thermoplasmata:88|Thermococci:86|Nitrososphaeria:57|Unclassified_Candidatus_Bathyarchaeota:52|Unclassified_Candidatus_Micrarchaeota:49|Methanococci:45|Unclassified_Candidatus_Woesearchaeota:43|Unclassifie…	Halobacteria:3	-	-	-
M00779|Dihydrokalafungin_biosynthesis_octaketide_=>_dihydrokalafungin	8	4	2976	2	0	0	0	K05556:370.57|K14626,K14627:158.30,119.70|K14628,K14629:462.33,407.47|K14630+K14631,K14632:412.33+192.73,81.40	Halobacteria:657|Methanomicrobia:323|Thermoprotei:311|Unclassified_Nitrososphaerota:264|Methanobacteria:257|Unclassified_Archaea:192|Unclassified_Euryarchaeota:158|Unclassified_Thermoproteota:89|Thermoplasmata:88|Thermococci:86|Nitrososphaeria:57|Unclassified_Candidatus_Bathyarchaeota:52|Unclassified_Candidatus_Micrarchaeota:49|Methanococci:45|Unclassified_Candidatus_Woesearchaeota:43|Unclassifie…	Halobacteria:1|Unclassified_Archaea:1	-	-	-
M00815|Validamycin_A_biosynthesis_sedoheptulopyranose-7P_=>_validamycin_A	9	9	2976	2	0	0	0	K19969:407.47|K20431:94.73|K20432:338.17|K20433:424.00|K20434:320.53|K20435:588.73|K20436:595.80|K20437:308.33|K20438:-	Halobacteria:656|Methanomicrobia:323|Thermoprotei:311|Unclassified_Nitrososphaerota:264|Methanobacteria:257|Unclassified_Archaea:193|Unclassified_Euryarchaeota:158|Unclassified_Thermoproteota:89|Thermoplasmata:88|Thermococci:86|Nitrososphaeria:57|Unclassified_Candidatus_Bathyarchaeota:52|Unclassified_Candidatus_Micrarchaeota:49|Methanococci:45|Unclassified_Candidatus_Woesearchaeota:43|Unclassifie…	Halobacteria:2	-	-	-
M00850|Vibrio_cholerae_pathogenicity_signature_cholera_toxins	7	6	2976	2	0	0	0	K10928+K10929:449.53+266.70|K10954:70.30|K10952:107.97|K10953:2608.20|K10948:183.00|K11018:332.90	Halobacteria:658|Methanomicrobia:322|Thermoprotei:311|Unclassified_Nitrososphaerota:263|Methanobacteria:257|Unclassified_Archaea:193|Unclassified_Euryarchaeota:158|Unclassified_Thermoproteota:89|Thermoplasmata:88|Thermococci:86|Nitrososphaeria:57|Unclassified_Candidatus_Bathyarchaeota:52|Unclassified_Candidatus_Micrarchaeota:49|Methanococci:45|Unclassified_Candidatus_Woesearchaeota:43|Unclassifie…	Methanomicrobia:1|Unclassified_Nitrososphaerota:1	-	-	-
M00879|Arginine_succinyltransferase_pathway_arginine_=>_glutamate	5	5	2976	2	0	0	0	K00673:129.30|K01484:265.90|K00840:707.70|K06447:444.73|K05526:109.60	Halobacteria:658|Methanomicrobia:323|Thermoprotei:311|Unclassified_Nitrososphaerota:263|Methanobacteria:257|Unclassified_Archaea:193|Unclassified_Euryarchaeota:158|Unclassified_Thermoproteota:89|Thermoplasmata:88|Thermococci:86|Nitrososphaeria:57|Unclassified_Candidatus_Bathyarchaeota:52|Unclassified_Candidatus_Micrarchaeota:49|Methanococci:45|Unclassified_Candidatus_Woesearchaeota:42|Unclassifie…	Unclassified_Candidatus_Woesearchaeota:1|Unclassified_Nitrososphaerota:1	-	-	-
M00065|GPI-anchor_biosynthesis_core_oligosaccharide	17	9	2977	1	0	0	0	K03857+K03859+K03858+K03861+K03860+K11001,K03857+K03859+K03858+K03861+K03860+K11002:239.13+59.90+44.50+47.93+131.60+46.53,239.13+59.90+44.50+47.93+131.60+81.63|K03434:116.73|K05283:150.43|K05284+K07541:217.77+48.33|K07542:146.83|K05285:262.20|K05286:171.50|K05288+K05287:508.80+55.50|K05310+K05287:480.77+55.50	Halobacteria:658|Methanomicrobia:323|Thermoprotei:311|Unclassified_Nitrososphaerota:264|Methanobacteria:257|Unclassified_Archaea:193|Unclassified_Euryarchaeota:158|Unclassified_Thermoproteota:89|Thermoplasmata:88|Thermococci:86|Nitrososphaeria:57|Unclassified_Candidatus_Bathyarchaeota:52|Unclassified_Candidatus_Micrarchaeota:49|Methanococci:45|Unclassified_Candidatus_Woesearchaeota:43|Unclassifie…	Unclassified_Candidatus_Heimdallarchaeota:1	-	-	-
M00160|V-type_ATPase_eukaryotes	14	1	2977	1	0	0	0	K02145+K02147+K02148+K02149+K02150+K02151+K02152+K02144+K02154+K03661+K02146+K02153+K03662,K02145+K02147+K02148+K02149+K02150+K02151+K02152+K02144+K02154+K02155+K02146+K02153+K03662:859.37+773.50+63.83+187.37+93.17+62.53+36.13+115.07+265.77+118.77+126.23+28.43+81.90,859.37+773.50+63.83+187.37+93.17+62.53+36.13+115.07+265.77+134.90+126.23+28.43+81.90	Halobacteria:658|Methanomicrobia:323|Thermoprotei:311|Unclassified_Nitrososphaerota:264|Methanobacteria:257|Unclassified_Archaea:193|Unclassified_Euryarchaeota:158|Unclassified_Thermoproteota:89|Thermoplasmata:88|Thermococci:86|Nitrososphaeria:57|Unclassified_Candidatus_Bathyarchaeota:52|Unclassified_Candidatus_Micrarchaeota:49|Methanococci:45|Unclassified_Candidatus_Woesearchaeota:43|Unclassifie…	Unclassified_Candidatus_Hydrothermarchaeota:1	-	-	-
M00163|Photosystem_I	6	1	2977	1	0	0	0	K02689+K02690+K02691+K02692+K02693+K02694:889.03+902.40+151.73+136.70+65.37+134.77	Halobacteria:658|Methanomicrobia:323|Thermoprotei:311|Unclassified_Nitrososphaerota:264|Methanobacteria:257|Unclassified_Archaea:193|Unclassified_Euryarchaeota:158|Unclassified_Thermoproteota:89|Thermoplasmata:87|Thermococci:86|Nitrososphaeria:57|Unclassified_Candidatus_Bathyarchaeota:52|Unclassified_Candidatus_Micrarchaeota:49|Methanococci:45|Unclassified_Candidatus_Woesearchaeota:43|Unclassifie…	Thermoplasmata:1	-	-	-
M00417|Cytochrome_o_ubiquinol_oxidase	4	1	2977	1	0	0	0	K02297+K02298+K02299+K02300:339.03+985.73+268.73+80.63	Halobacteria:658|Methanomicrobia:323|Thermoprotei:311|Unclassified_Nitrososphaerota:263|Methanobacteria:257|Unclassified_Archaea:193|Unclassified_Euryarchaeota:158|Unclassified_Thermoproteota:89|Thermoplasmata:88|Thermococci:86|Nitrososphaeria:57|Unclassified_Candidatus_Bathyarchaeota:52|Unclassified_Candidatus_Micrarchaeota:49|Methanococci:45|Unclassified_Candidatus_Woesearchaeota:43|Unclassifie…	Unclassified_Nitrososphaerota:1	-	-	-
M00547|Benzene/toluene_degradation_benzene_=>_catechol_/_toluene_=>_3-methylcatechol	5	2	2977	1	0	0	0	K03268+K16268+K18089+K18090:1055.20+-+241.07+887.37|K16269:598.70	Halobacteria:658|Methanomicrobia:323|Thermoprotei:311|Unclassified_Nitrososphaerota:264|Methanobacteria:257|Unclassified_Archaea:193|Unclassified_Euryarchaeota:158|Unclassified_Thermoproteota:89|Thermoplasmata:88|Thermococci:86|Nitrososphaeria:57|Unclassified_Candidatus_Bathyarchaeota:52|Unclassified_Candidatus_Micrarchaeota:49|Methanococci:45|Unclassified_Candidatus_Woesearchaeota:43|Unclassifie…	Unclassified_Candidatus_Altiarchaeota:1	-	-	-
M00630|D-Galacturonate_degradation_(fungi)_D-galacturonate_=>_glycerol	5	4	2977	1	0	0	0	K18106,K19634:214.80,611.03|K18102:679.57|K18103:477.67|K18107:446.40	Halobacteria:658|Methanomicrobia:323|Thermoprotei:311|Unclassified_Nitrososphaerota:264|Methanobacteria:256|Unclassified_Archaea:193|Unclassified_Euryarchaeota:158|Unclassified_Thermoproteota:89|Thermoplasmata:88|Thermococci:86|Nitrososphaeria:57|Unclassified_Candidatus_Bathyarchaeota:52|Unclassified_Candidatus_Micrarchaeota:49|Methanococci:45|Unclassified_Candidatus_Woesearchaeota:43|Unclassifie…	Methanobacteria:1	-	-	-
M00787|Bacilysin_biosynthesis_prephenate_=>_bacilysin	6	6	2977	1	0	0	0	K19546:181.90|K19547:161.03|K19550:388.33|K19549:688.50|K19548:318.67|K13037:475.30	Halobacteria:658|Methanomicrobia:323|Thermoprotei:311|Unclassified_Nitrososphaerota:264|Methanobacteria:257|Unclassified_Archaea:193|Unclassified_Euryarchaeota:157|Unclassified_Thermoproteota:89|Thermoplasmata:88|Thermococci:86|Nitrososphaeria:57|Unclassified_Candidatus_Bathyarchaeota:52|Unclassified_Candidatus_Micrarchaeota:49|Methanococci:45|Unclassified_Candidatus_Woesearchaeota:43|Unclassifie…	Unclassified_Euryarchaeota:1	-	-	-
M00789|Rebeccamycin_biosynthesis_tryptophan_=>_rebeccamycin	7	6	2977	1	0	0	0	K14266:401.63|K19884:-|K19885:-|K19886+K19887:-+-|K19888:-|K19889:-	Halobacteria:658|Methanomicrobia:323|Thermoprotei:311|Unclassified_Nitrososphaerota:264|Methanobacteria:257|Unclassified_Archaea:193|Unclassified_Euryarchaeota:157|Unclassified_Thermoproteota:89|Thermoplasmata:88|Thermococci:86|Nitrososphaeria:57|Unclassified_Candidatus_Bathyarchaeota:52|Unclassified_Candidatus_Micrarchaeota:49|Methanococci:45|Unclassified_Candidatus_Woesearchaeota:43|Unclassifie…	Unclassified_Euryarchaeota:1	-	-	-
M00905|Grixazone_biosynthesis_aspartate_4-semialdehyde_=>_grixazone_B	3	3	2977	1	0	0	0	K18287:340.60|K17835:385.97|K20204:601.60	Halobacteria:657|Methanomicrobia:323|Thermoprotei:311|Unclassified_Nitrososphaerota:264|Methanobacteria:257|Unclassified_Archaea:193|Unclassified_Euryarchaeota:158|Unclassified_Thermoproteota:89|Thermoplasmata:88|Thermococci:86|Nitrososphaeria:57|Unclassified_Candidatus_Bathyarchaeota:52|Unclassified_Candidatus_Micrarchaeota:49|Methanococci:45|Unclassified_Candidatus_Woesearchaeota:43|Unclassifie…	Halobacteria:1	-	-	-
M00944|Morphine_biosynthesis_(S)-reticuline_=>_morphine	8	8	2977	1	0	0	0	K22093:-|K13391:1204.03|K13392:705.90|K13393:1120.40|K01742:-|K14975:-|K14976:827.20|K13394:725.63	Halobacteria:658|Methanomicrobia:323|Thermoprotei:311|Unclassified_Nitrososphaerota:264|Methanobacteria:257|Unclassified_Archaea:193|Unclassified_Euryarchaeota:158|Unclassified_Thermoproteota:89|Thermoplasmata:88|Thermococci:86|Nitrososphaeria:57|Unclassified_Candidatus_Bathyarchaeota:52|Unclassified_Candidatus_Micrarchaeota:49|Methanococci:44|Unclassified_Candidatus_Woesearchaeota:43|Unclassifie…	Methanococci:1	-	-	-
M00967|Flavone_degradation_luteolin/apigenin_=>_DHCA/phloretate	3	3	2977	1	0	0	0	K26176:286.07|K26178:729.47|K22906:283.63	Halobacteria:658|Methanomicrobia:323|Thermoprotei:311|Unclassified_Nitrososphaerota:264|Methanobacteria:257|Unclassified_Archaea:193|Unclassified_Euryarchaeota:158|Unclassified_Thermoproteota:89|Thermoplasmata:88|Thermococci:86|Nitrososphaeria:57|Unclassified_Candidatus_Bathyarchaeota:51|Unclassified_Candidatus_Micrarchaeota:49|Methanococci:45|Unclassified_Candidatus_Woesearchaeota:43|Unclassifie…	Unclassified_Candidatus_Bathyarchaeota:1	-	-	-
M00643|Multidrug_resistance_efflux_pump_MexXY-OprM	4	2	2977	1	0	0	0	K18129:226.90|K18094+K18095+K18139:512.90+1608.83+422.37	Halobacteria:658|Methanomicrobia:323|Thermoprotei:311|Unclassified_Nitrososphaerota:263|Methanobacteria:257|Unclassified_Archaea:193|Unclassified_Euryarchaeota:158|Unclassified_Thermoproteota:89|Thermoplasmata:88|Thermococci:86|Nitrososphaeria:57|Unclassified_Candidatus_Bathyarchaeota:52|Unclassified_Candidatus_Micrarchaeota:49|Methanococci:45|Unclassified_Candidatus_Woesearchaeota:43|Unclassifie…	Unclassified_Nitrososphaerota:1	-	-	-
M00043|Thyroid_hormone_biosynthesis_tyrosine_=>_triiodothyronine/thyroxine	1	1	2978	0	0	0	0	K00431:1161.33	Halobacteria:658|Methanomicrobia:323|Thermoprotei:311|Unclassified_Nitrososphaerota:264|Methanobacteria:257|Unclassified_Archaea:193|Unclassified_Euryarchaeota:158|Unclassified_Thermoproteota:89|Thermoplasmata:88|Thermococci:86|Nitrososphaeria:57|Unclassified_Candidatus_Bathyarchaeota:52|Unclassified_Candidatus_Micrarchaeota:49|Methanococci:45|Unclassified_Candidatus_Woesearchaeota:43|Unclassifie…	-	-	-	-
M00056|O-glycan_biosynthesis_mucin_type_core	7	4	2978	0	0	0	0	K00710:83.03|K00731,K09653:223.53,213.27|K00727,K09662,K09663:542.93,673.93,564.23|K00739:466.03	Halobacteria:658|Methanomicrobia:323|Thermoprotei:311|Unclassified_Nitrososphaerota:264|Methanobacteria:257|Unclassified_Archaea:193|Unclassified_Euryarchaeota:158|Unclassified_Thermoproteota:89|Thermoplasmata:88|Thermococci:86|Nitrososphaeria:57|Unclassified_Candidatus_Bathyarchaeota:52|Unclassified_Candidatus_Micrarchaeota:49|Methanococci:45|Unclassified_Candidatus_Woesearchaeota:43|Unclassifie…	-	-	-	-
M00058|Glycosaminoglycan_biosynthesis_chondroitin_sulfate_backbone	4	2	2978	0	0	0	0	K00746:367.77|K13499,K00747,K03419:424.67,954.17,1166.30	Halobacteria:658|Methanomicrobia:323|Thermoprotei:311|Unclassified_Nitrososphaerota:264|Methanobacteria:257|Unclassified_Archaea:193|Unclassified_Euryarchaeota:158|Unclassified_Thermoproteota:89|Thermoplasmata:88|Thermococci:86|Nitrososphaeria:57|Unclassified_Candidatus_Bathyarchaeota:52|Unclassified_Candidatus_Micrarchaeota:49|Methanococci:45|Unclassified_Candidatus_Woesearchaeota:43|Unclassifie…	-	-	-	-
M00067|Sulfoglycolipids_biosynthesis_ceramide/1-alkyl-2-acylglycerol_=>_sulfatide/seminolipid	2	2	2978	0	0	0	0	K04628:569.80|K01019:398.77	Halobacteria:658|Methanomicrobia:323|Thermoprotei:311|Unclassified_Nitrososphaerota:264|Methanobacteria:257|Unclassified_Archaea:193|Unclassified_Euryarchaeota:158|Unclassified_Thermoproteota:89|Thermoplasmata:88|Thermococci:86|Nitrososphaeria:57|Unclassified_Candidatus_Bathyarchaeota:52|Unclassified_Candidatus_Micrarchaeota:49|Methanococci:45|Unclassified_Candidatus_Woesearchaeota:43|Unclassifie…	-	-	-	-
M00068|Glycosphingolipid_biosynthesis_globo-series_LacCer_=>_Gb4Cer	2	2	2978	0	0	0	0	K01988:292.57|K00719:349.50	Halobacteria:658|Methanomicrobia:323|Thermoprotei:311|Unclassified_Nitrososphaerota:264|Methanobacteria:257|Unclassified_Archaea:193|Unclassified_Euryarchaeota:158|Unclassified_Thermoproteota:89|Thermoplasmata:88|Thermococci:86|Nitrososphaeria:57|Unclassified_Candidatus_Bathyarchaeota:52|Unclassified_Candidatus_Micrarchaeota:49|Methanococci:45|Unclassified_Candidatus_Woesearchaeota:43|Unclassifie…	-	-	-	-
M00070|Glycosphingolipid_biosynthesis_lacto-series_LacCer_=>_Lc4Cer	4	2	2978	0	0	0	0	K03766:425.73|K07819,K07820,K03877:354.23,403.97,396.73	Halobacteria:658|Methanomicrobia:323|Thermoprotei:311|Unclassified_Nitrososphaerota:264|Methanobacteria:257|Unclassified_Archaea:193|Unclassified_Euryarchaeota:158|Unclassified_Thermoproteota:89|Thermoplasmata:88|Thermococci:86|Nitrososphaeria:57|Unclassified_Candidatus_Bathyarchaeota:52|Unclassified_Candidatus_Micrarchaeota:49|Methanococci:45|Unclassified_Candidatus_Woesearchaeota:43|Unclassifie…	-	-	-	-
M00071|Glycosphingolipid_biosynthesis_neolacto-series_LacCer_=>_nLc4Cer	5	2	2978	0	0	0	0	K03766:425.73|K07966,K07967,K07968,K07969:556.17,555.10,497.03,444.57	Halobacteria:658|Methanomicrobia:323|Thermoprotei:311|Unclassified_Nitrososphaerota:264|Methanobacteria:257|Unclassified_Archaea:193|Unclassified_Euryarchaeota:158|Unclassified_Thermoproteota:89|Thermoplasmata:88|Thermococci:86|Nitrososphaeria:57|Unclassified_Candidatus_Bathyarchaeota:52|Unclassified_Candidatus_Micrarchaeota:49|Methanococci:45|Unclassified_Candidatus_Woesearchaeota:43|Unclassifie…	-	-	-	-
M00073|N-glycan_precursor_trimming	4	4	2978	0	0	0	0	K01228:262.17|K05546:1306.20|K23741:669.43|K01230:617.03	Halobacteria:658|Methanomicrobia:323|Thermoprotei:311|Unclassified_Nitrososphaerota:264|Methanobacteria:257|Unclassified_Archaea:193|Unclassified_Euryarchaeota:158|Unclassified_Thermoproteota:89|Thermoplasmata:88|Thermococci:86|Nitrososphaeria:57|Unclassified_Candidatus_Bathyarchaeota:52|Unclassified_Candidatus_Micrarchaeota:49|Methanococci:45|Unclassified_Candidatus_Woesearchaeota:43|Unclassifie…	-	-	-	-
M00074|N-glycan_biosynthesis_high-mannose_type	11	7	2978	0	0	0	0	K05546:1306.20|K23741:669.43|K01230:617.03|K05528:247.03|K05529+K05530:343.50+701.20|K05529+K05531+K05532+K05533+K05534:343.50+185.53+225.33+533.07+449.70|K05535:176.17	Halobacteria:658|Methanomicrobia:323|Thermoprotei:311|Unclassified_Nitrososphaerota:264|Methanobacteria:257|Unclassified_Archaea:193|Unclassified_Euryarchaeota:158|Unclassified_Thermoproteota:89|Thermoplasmata:88|Thermococci:86|Nitrososphaeria:57|Unclassified_Candidatus_Bathyarchaeota:52|Unclassified_Candidatus_Micrarchaeota:49|Methanococci:45|Unclassified_Candidatus_Woesearchaeota:43|Unclassifie…	-	-	-	-
M00075|N-glycan_biosynthesis_complex_type	2	2	2978	0	0	0	0	K01231:1138.70|K00736:70.03	Halobacteria:658|Methanomicrobia:323|Thermoprotei:311|Unclassified_Nitrososphaerota:264|Methanobacteria:257|Unclassified_Archaea:193|Unclassified_Euryarchaeota:158|Unclassified_Thermoproteota:89|Thermoplasmata:88|Thermococci:86|Nitrososphaeria:57|Unclassified_Candidatus_Bathyarchaeota:52|Unclassified_Candidatus_Micrarchaeota:49|Methanococci:45|Unclassified_Candidatus_Woesearchaeota:43|Unclassifie…	-	-	-	-
M00090|Phosphatidylcholine_(PC)_biosynthesis_choline_=>_PC	5	3	2978	0	0	0	0	K00866,K14156:338.63,319.80|K00968:219.80|K00994,K13644:699.50,712.17	Halobacteria:658|Methanomicrobia:323|Thermoprotei:311|Unclassified_Nitrososphaerota:264|Methanobacteria:257|Unclassified_Archaea:193|Unclassified_Euryarchaeota:158|Unclassified_Thermoproteota:89|Thermoplasmata:88|Thermococci:86|Nitrososphaeria:57|Unclassified_Candidatus_Bathyarchaeota:52|Unclassified_Candidatus_Micrarchaeota:49|Methanococci:45|Unclassified_Candidatus_Woesearchaeota:43|Unclassifie…	-	-	-	-
M00092|Phosphatidylethanolamine_(PE)_biosynthesis_ethanolamine_=>_PE	5	3	2978	0	0	0	0	K00894,K14156:338.70,319.80|K00967:230.73|K00993,K13644:406.83,712.17	Halobacteria:658|Methanomicrobia:323|Thermoprotei:311|Unclassified_Nitrososphaerota:264|Methanobacteria:257|Unclassified_Archaea:193|Unclassified_Euryarchaeota:158|Unclassified_Thermoproteota:89|Thermoplasmata:88|Thermococci:86|Nitrososphaeria:57|Unclassified_Candidatus_Bathyarchaeota:52|Unclassified_Candidatus_Micrarchaeota:49|Methanococci:45|Unclassified_Candidatus_Woesearchaeota:43|Unclassifie…	-	-	-	-
M00102|Ergocalciferol_biosynthesis_squalene_23-epoxide_=>_ergosterol/ergocalciferol	11	11	2978	0	0	0	0	K01852:1005.90|K05917:304.00|K00222:720.90|K07750:330.50|K07748:415.43|K09827:239.13|K00559:399.37|K09829:200.87|K00227:135.00|K09831:661.83|K00223:479.40	Halobacteria:658|Methanomicrobia:323|Thermoprotei:311|Unclassified_Nitrososphaerota:264|Methanobacteria:257|Unclassified_Archaea:193|Unclassified_Euryarchaeota:158|Unclassified_Thermoproteota:89|Thermoplasmata:88|Thermococci:86|Nitrososphaeria:57|Unclassified_Candidatus_Bathyarchaeota:52|Unclassified_Candidatus_Micrarchaeota:49|Methanococci:45|Unclassified_Candidatus_Woesearchaeota:43|Unclassifie…	-	-	-	-
M00103|Cholecalciferol_biosynthesis	2	2	2978	0	0	0	0	K07419:634.73|K07438:669.93	Halobacteria:658|Methanomicrobia:323|Thermoprotei:311|Unclassified_Nitrososphaerota:264|Methanobacteria:257|Unclassified_Archaea:193|Unclassified_Euryarchaeota:158|Unclassified_Thermoproteota:89|Thermoplasmata:88|Thermococci:86|Nitrososphaeria:57|Unclassified_Candidatus_Bathyarchaeota:52|Unclassified_Candidatus_Micrarchaeota:49|Methanococci:45|Unclassified_Candidatus_Woesearchaeota:43|Unclassifie…	-	-	-	-
M00106|Conjugated_bile_acid_biosynthesis_cholate_=>_taurocholate/glycocholate	2	2	2978	0	0	0	0	K08748:928.93|K00659:575.17	Halobacteria:658|Methanomicrobia:323|Thermoprotei:311|Unclassified_Nitrososphaerota:264|Methanobacteria:257|Unclassified_Archaea:193|Unclassified_Euryarchaeota:158|Unclassified_Thermoproteota:89|Thermoplasmata:88|Thermococci:86|Nitrososphaeria:57|Unclassified_Candidatus_Bathyarchaeota:52|Unclassified_Candidatus_Micrarchaeota:49|Methanococci:45|Unclassified_Candidatus_Woesearchaeota:43|Unclassifie…	-	-	-	-
[truncated: 136 more rows]

## Sheet: archaea_STANDARD_MANUAL
Module completeness for archaea with STANDARD KEGG cutoffs and MANUAL KEGG modules
[truncated: 43 more rows]

## Sheet: archaea_LOWERED_ORIGINAL
Module completeness for archaea with LOWERED KEGG cutoffs and ORIGINAL KEGG modules
[truncated: 480 more rows]

[truncated: 5 more sheets: archaea_LOWERED_MANUAL, bacteria_STANDARD_ORIGINAL, bacteria_STANDARD_MANUAL, bacteria_LOWERED_ORIGINAL, bacteria_LOWERED_MANUAL]
